# Supplementary material for: Coordinated stimulation of axon regenerative and neurodegenerative transcriptional programs by ATF4 following optic nerve injury
Source: eLife. 2026 Feb 26;12:RP87528. doi: 10.7554/eLife.87528 (PMC12945389; doi:10.7554/eLife.87528)
Supplement: Figure 1—source data 1. [file elife-87528-fig1-data1.xlsx]

## Sheet: Fig 1A source data
	% Surviving RBPMS+ RGCs
	replicate 1	replicate 2	replicate 3	replicate 4
Ddit3 cKO: Control AAV	33.1028	27.519	20.8965	37.251
	replicate 1	replicate 2	replicate 3	replicate 4
Ddit3 cKO: Cre AAV	37.4947	37.8733	28.6219	29.1577	32.1383	31.6667
	replicate 1	replicate 2	replicate 3
Atf4 cKO: Control AAV	19.645	26.5964	23.9729
	replicate 1	replicate 2	replicate 3	replicate 4
Atf4 cKO: Cre AAV	67.5325	51.597	55.6168	64.7043

## Sheet: Fig 1B source data
	# Surviving p-c-Jun+ RGCs/field
	replicate 1	replicate 2	replicate 3	replicate 4	replicate 5
wildtype: Cre-AAV	402.9	300.7	320.9	310.7	345.1
	replicate 1	replicate 2	replicate 3	replicate 4	replicate 5	replicate 6	replicate 7
Atf4 cKO: Cre-AAV	944.2	1064.9	1004	1117.1	782.4	1021.8	1124.9
	replicate 1	replicate 2	replicate 3	replicate 4	replicate 5	replicate 6
Ddit3 cKO: Cre-AAV	647	360.3	663.3	589	407.4	520.7
	replicate 1	replicate 2	replicate 3	replicate 4	replicate 5
Ddit3 cKO: Control AAV	302.8	578	381.3	381.1	380

## Sheet: Fig 1C source data
	# Surviving p-c-Jun+ RGCs/field
	replicate 1	replicate 2	replicate 3	replicate 4	replicate 5	replicate 6	replicate 7
wildtype	397.4	339.8	294.8	261.8	268	339.2	261.8
	replicate 1	replicate 2	replicate 3	replicate 4	replicate 5
Atf4 cKO	971.75	1094.2	1136.4	181.5	773.75
	replicate 1	replicate 2	replicate 3	replicate 4	replicate 5
Atf4/Ddit3 dcKO	854.4	1083.5	953	1389	939.6

## Sheet: Fig 1D source data
	# Surviving p-c-Jun+ RGCs/field
	replicate 1	replicate 2	replicate 3	replicate 4	replicate 5	replicate 6
wildtype	396.5	296	262.1	217.6	379.1	276.2
	replicate 1	replicate 2	replicate 3	replicate 4	replicate 5
Atf4 cKO	352.2	906.4	1093.2	836.75	847.4
	replicate 1	replicate 2	replicate 3	replicate 4	replicate 5
Eif2ak3 cKO	598.2	757.6	706.75	589.6	586
