# Supplementary material for: Coordinated stimulation of axon regenerative and neurodegenerative transcriptional programs by ATF4 following optic nerve injury
Source: eLife. 2026 Feb 26;12:RP87528. doi: 10.7554/eLife.87528 (PMC12945389; doi:10.7554/eLife.87528)
Supplement: Figure 5—source data 1. [file elife-87528-fig5-data1.xlsx]

## Sheet: Fig 5D source data
genotype	distance past lesion	# axons
		replicate 1	replicate 2	replicate 3	replicate 4	replicate 5	replicate 6	replicate 7	replicate 8
Pten cKO	0.75-mm	77	66	46	81	166	18	194	183
	1.5-mm	4	19	17	12	19	3	22	50
		replicate 1	replicate 2	replicate 3	replicate 4	replicate 5	replicate 6	replicate 7
Pten/Atf4 dcKO	0.75-mm	15	44	64	64	40	12	33
	1.5-mm	0	10	10	2	1	2	3
		replicate 1	replicate 2	replicate 3	replicate 4
Pten/Eif2ak3 dcKO	0.75-mm	94	14	10	13
	1.5-mm	18	0	3	0
