# Supplementary material for: Coordinated stimulation of axon regenerative and neurodegenerative transcriptional programs by ATF4 following optic nerve injury
Source: eLife. 2026 Feb 26;12:RP87528. doi: 10.7554/eLife.87528 (PMC12945389; doi:10.7554/eLife.87528)
Supplement: Supplementary file 1. [file elife-87528-supp1.xlsx]

## Sheet: Supplementary file 1 RNA-seq
gene_id	WT_crushvsWT_uninjured_WT_crush	WT_crushvsWT_uninjured_WT_uninjured	WT_crushvsWT_uninjured_log2FoldChange	WT_crushvsWT_uninjured_pvalue	WT_crushvsWT_uninjured_FDR	ATF4_cKOvsWT_crush_ATF4_cKO	ATF4_cKOvsWT_crush_WT_crush	ATF4_cKOvsWT_crush_log2FoldChange	ATF4_cKOvsWT_crush_pvalue	ATF4_cKOvsWT_crush_FDR	PERK_cKOvsWT_crush_PERK_cKO	PERK_cKOvsWT_crush_WT_crush	PERK_cKOvsWT_crush_log2FoldChange	PERK_cKOvsWT_crush_pvalue	PERK_cKOvsWT_crush_FDR	CHOP_cKOvsWT_crush_CHOP_cKO	CHOP_cKOvsWT_crush_WT_crush	CHOP_cKOvsWT_crush_log2FoldChange	CHOP_cKOvsWT_crush_pvalue	CHOP_cKOvsWT_crush_FDR	gene_name	gene_chr	gene_start	gene_end	gene_strand	gene_length	gene_biotype	gene_description	tf_family
ENSMUSG00000026247	928.531	29.4807	4.97171	9.81357e-69	1.97292e-64	181.712	955.327	-2.39387	2.80848e-23	1.09056e-19	161.107	942.266	-2.5474	8.63875e-08	1.20015e-05	603.761	950.709	-0.65486	6.16618e-05	0.041387	Ecel1	1	87147655	87156521	-	3500	protein_coding	endothelin converting enzyme-like 1 [Source:MGI Symbol;Acc:MGI:1343461]	-
ENSMUSG00000063632	316.487	38.5825	3.03592	2.72145e-55	2.7356e-51	309.869	325.507	-0.0706878	0.72293	0.955714	313.84	321.206	-0.0321012	0.86161	0.977207	335.321	323.959	0.0507487	0.701439	0.999695	Sox11	12	27334264	27342574	-	8311	protein_coding	SRY (sex determining region Y)-box 11 [Source:MGI Symbol;Acc:MGI:98359]	HMG
ENSMUSG00000046275	89.6116	408.912	-2.1904	5.24039e-53	3.51176e-49	105.629	92.1711	0.197401	0.301334	0.815196	117.145	90.9458	0.367137	0.0171983	0.265476	88.2023	91.7335	-0.0552099	0.720714	0.999695	Tusc5	11	76679808	76698664	+	3302	protein_coding	tumor suppressor candidate 5 [Source:MGI Symbol;Acc:MGI:3029307]	-
ENSMUSG00000046480	9.03693	132.468	-3.88	1.49494e-43	7.51356e-40	13.4194	9.29217	0.534926	0.345706	0.837728	21.4694	9.17196	1.22459	0.00463173	0.116863	9.50298	9.249	0.0428379	0.920085	1	Scn4b	9	45138395	45154152	+	4982	protein_coding	sodium channel, type IV, beta [Source:MGI Symbol;Acc:MGI:2687406]	-
ENSMUSG00000050359	243.823	2.49391	6.60503	3.11755e-43	1.2535e-39	106.743	250.839	-1.23205	4.31759e-05	0.00649289	157.765	247.46	-0.648952	NA	1	356.274	249.609	0.514236	0.000238504	0.10953	Sprr1a	3	92483952	92485895	-	806	protein_coding	small proline-rich protein 1A [Source:MGI Symbol;Acc:MGI:106660]	-
ENSMUSG00000032802	1829.91	887.641	1.04368	2.50703e-42	8.40022e-39	1219.61	1882.55	-0.62622	9.35144e-10	9.10741e-07	1241.31	1857.14	-0.580743	6.87127e-08	9.72608e-06	1707.04	1873.4	-0.134019	0.14798	0.999695	Srxn1	2	152105516	152111376	+	2820	protein_coding	sulfiredoxin 1 homolog (S. cerevisiae) [Source:MGI Symbol;Acc:MGI:104971]	-
ENSMUSG00000031491	446.787	1280.57	-1.51903	6.71682e-41	1.92907e-37	578.643	459.679	0.332149	0.00222704	0.0843469	692.879	453.433	0.611221	6.20381e-08	8.9502e-06	497.696	457.421	0.121281	0.147166	0.999695	Chrna6	8	27403212	27413944	-	2906	protein_coding	cholinergic receptor, nicotinic, alpha polypeptide 6 [Source:MGI Symbol;Acc:MGI:106213]	-
ENSMUSG00000023067	245.223	46.4825	2.39812	1.41595e-34	3.55829e-31	194.471	252.306	-0.375808	0.0343857	0.393101	107.775	248.87	-1.20608	1.25447e-05	0.00100117	201.293	251.063	-0.318384	0.00823952	0.95766	Cdkn1a	17	29090976	29100727	+	3553	protein_coding	cyclin-dependent kinase inhibitor 1A (P21) [Source:MGI Symbol;Acc:MGI:104556]	-
ENSMUSG00000046607	150.816	23.5279	2.68903	1.0815e-33	2.41583e-30	78.5962	155.149	-0.982749	3.26517e-10	3.5147e-07	113.664	153.066	-0.431361	0.0018155	0.058791	180.014	154.39	0.222518	0.195735	0.999695	Hrk	5	118164648	118189478	+	5677	protein_coding	harakiri, BCL2 interacting protein (contains only BH3 domain) [Source:MGI Symbol;Acc:MGI:1201608]	-
ENSMUSG00000026628	684.342	149.467	2.19654	5.33829e-33	1.07321e-29	408.124	704.026	-0.786752	1.40212e-05	0.00289658	286.107	694.502	-1.27892	0.00374137	0.0996488	648.569	700.619	-0.111164	0.374659	0.999695	Atf3	1	191170296	191218039	-	2154	protein_coding	activating transcription factor 3 [Source:MGI Symbol;Acc:MGI:109384]	TF_bZIP
ENSMUSG00000049511	30.3094	150.252	-2.31035	5.40524e-31	9.87882e-28	38.5323	31.1667	0.305538	0.24361	0.767903	54.7209	30.7598	0.828394	0.00365518	0.0979328	24.4493	31.0247	-0.341038	0.242433	0.999695	Htr1b	9	81628291	81633828	-	4724	protein_coding	5-hydroxytryptamine (serotonin) receptor 1B [Source:MGI Symbol;Acc:MGI:96274]	-
ENSMUSG00000022055	1768.2	3472.18	-0.973629	9.77215e-31	1.63716e-27	2147.85	1818.78	0.239932	0.217337	0.748286	2782.73	1794.48	0.632748	1.21905e-18	1.01614e-15	2122.7	1810.12	0.229922	0.00377433	0.679029	Nefl	14	68083863	68089095	+	3380	protein_coding	neurofilament, light polypeptide [Source:MGI Symbol;Acc:MGI:97313]	-
ENSMUSG00000048349	173.443	476.105	-1.45744	1.05142e-23	1.62598e-20	294.716	178.417	0.724308	0.00218439	0.0837692	337.116	176.029	0.937241	1.26709e-18	1.01847e-15	200.794	177.553	0.178225	0.335674	0.999695	Pou4f1	14	104461676	104467999	-	4672	protein_coding	POU domain, class 4, transcription factor 1 [Source:MGI Symbol;Acc:MGI:102525]	Pou
ENSMUSG00000031688	31.7232	157.654	-2.31058	1.62033e-23	2.32679e-20	71.7765	32.6562	1.13579	0.00199235	0.0808484	77.0822	32.1985	1.25615	9.90061e-06	0.000828339	33.7867	32.4812	0.0561828	0.861419	0.999695	Pou4f2	8	78433010	78436645	-	3204	protein_coding	POU domain, class 4, transcription factor 2 [Source:MGI Symbol;Acc:MGI:102524]	Pou
ENSMUSG00000069372	22.7266	105.192	-2.21298	5.37819e-22	7.2082e-19	41.4547	23.3878	0.826548	0.04403	0.440762	54.2227	23.0694	1.23104	0.000381115	0.0175864	26.0489	23.2646	0.166621	0.561841	0.999695	Ctxn3	18	57468516	57478133	+	1605	protein_coding	cortexin 3 [Source:MGI Symbol;Acc:MGI:3642816]	-
ENSMUSG00000020396	485.523	1244.22	-1.35763	6.42498e-22	8.07299e-19	608.751	499.476	0.285356	0.0173465	0.277019	735.33	492.738	0.577955	7.24468e-07	8.36148e-05	542.448	497.067	0.125651	0.160664	0.999695	Nefh	11	4938754	4948064	-	3994	protein_coding	neurofilament, heavy polypeptide [Source:MGI Symbol;Acc:MGI:97309]	-
ENSMUSG00000099839	89.0718	1.78102	5.66577	6.98905e-22	8.26517e-19	11.1502	91.5912	-3.03583	4.26435e-26	2.90715e-22	7.93461	90.3885	-3.50741	1.01082e-23	1.33821e-20	44.2025	91.1745	-1.04363	1.04343e-06	0.00130063	Gm29374	1	87142874	87146983	-	1340	lincRNA	predicted gene 29374 [Source:MGI Symbol;Acc:MGI:5580080]	-
ENSMUSG00000032387	87.2137	307.383	-1.81754	1.10432e-20	1.2334e-17	172.604	89.681	0.944994	4.77824e-09	3.90899e-06	176.684	88.5075	0.996332	2.95966e-11	7.65633e-09	105.982	89.2717	0.247302	0.0915255	0.999695	Rbpms2	9	65629648	65660528	+	2506	protein_coding	RNA binding protein with multiple splicing 2 [Source:MGI Symbol;Acc:MGI:1919223]	-
ENSMUSG00000024256	175.749	48.9352	1.84046	3.70209e-19	3.9172e-16	100.154	180.783	-0.851527	0.00268505	0.0941617	141.447	178.351	-0.333116	0.192183	0.725366	227.183	179.928	0.336348	0.0182834	0.999695	Adcyap1	17	93199422	93205485	+	2088	protein_coding	adenylate cyclase activating polypeptide 1 [Source:MGI Symbol;Acc:MGI:105094]	-
ENSMUSG00000031586	211.014	476.098	-1.17458	2.93048e-18	2.94572e-15	314.094	217.07	0.533223	0.000611059	0.0390543	316.761	214.159	0.565009	1.32143e-08	2.21941e-06	239.151	216.019	0.147549	0.245918	0.999695	Rbpms	8	33782643	33929863	-	6556	protein_coding	RNA binding protein gene with multiple splicing [Source:MGI Symbol;Acc:MGI:1334446]	-
ENSMUSG00000032318	17.6972	79.8318	-2.1697	4.09235e-18	3.91775e-15	39.3061	18.2082	1.10865	9.10198e-05	0.0105769	40.5239	17.9602	1.17091	7.56078e-05	0.00461146	30.2827	18.1188	0.737767	0.00941046	0.999695	Isl2	9	55538672	55546180	+	2193	protein_coding	insulin related protein 2 (islet 2) [Source:MGI Symbol;Acc:MGI:109156]	Homeobox
ENSMUSG00000021260	197.084	71.0667	1.46967	1.1805e-17	1.07876e-14	83.7272	202.701	-1.27726	1.15138e-18	2.9435e-15	85.7253	199.997	-1.21779	1.24252e-09	2.56553e-07	145.224	201.767	-0.47379	0.000564233	0.218809	Hhipl1	12	108306270	108330869	+	5601	protein_coding	hedgehog interacting protein-like 1 [Source:MGI Symbol;Acc:MGI:1919265]	-
ENSMUSG00000005716	36.1912	170.238	-2.23225	8.22385e-17	7.18836e-14	55.5984	37.2691	0.577339	0.111384	0.624289	75.4545	36.7308	1.03826	0.00046139	0.0202814	43.6719	37.0648	0.234478	0.436633	0.999695	Pvalb	15	78191114	78206400	-	1041	protein_coding	parvalbumin [Source:MGI Symbol;Acc:MGI:97821]	-
ENSMUSG00000022454	287.801	579.355	-1.01007	3.66196e-16	3.0675e-13	309.68	296.023	0.0655051	0.699155	0.951815	377.395	292.083	0.370823	9.54015e-05	0.00554808	291.242	294.62	-0.0155764	0.890335	0.999695	Nell2	15	95075230	95528559	-	4670	protein_coding	NEL-like 2 [Source:MGI Symbol;Acc:MGI:1858510]	-
ENSMUSG00000031492	504.289	1179.51	-1.22573	5.55374e-16	4.4661e-13	703.996	518.605	0.440841	0.00184416	0.0767039	896.947	511.797	0.808857	1.24103e-10	3.03594e-08	529.146	516.186	0.0358965	0.677691	0.999695	Chrnb3	8	27368711	27399730	+	6369	protein_coding	cholinergic receptor, nicotinic, beta polypeptide 3 [Source:MGI Symbol;Acc:MGI:106212]	-
ENSMUSG00000072812	106.041	234.091	-1.14165	6.27064e-16	4.84865e-13	153.049	109.095	0.488758	0.0371126	0.407641	239.179	107.619	1.15251	3.3024e-19	2.97295e-16	126.408	108.56	0.219696	0.164683	0.999695	Ahnak2	12	112772194	112802657	-	14163	protein_coding	AHNAK nucleoprotein 2 [Source:MGI Symbol;Acc:MGI:2144831]	-
ENSMUSG00000054459	730.419	1449.36	-0.988642	1.08152e-15	8.05292e-13	825.2	751.368	0.135694	0.102834	0.60873	890.279	741.308	0.263351	0.00177256	0.0578162	761.556	747.725	0.0270953	0.677823	0.999695	Vsnl1	12	11325242	11436613	-	1956	protein_coding	visinin-like 1 [Source:MGI Symbol;Acc:MGI:1349453]	-
ENSMUSG00000028926	869.793	1723.4	-0.986341	1.90164e-15	1.36537e-12	1023.02	894.705	0.193159	0.0809392	0.559691	1140.23	882.743	0.368677	2.51221e-06	0.000256241	921.436	890.406	0.0494353	0.51976	0.999695	Cdk14	5	4803391	5420312	-	18877	protein_coding	cyclin-dependent kinase 14 [Source:MGI Symbol;Acc:MGI:894318]	-
ENSMUSG00000027313	187.367	58.9019	1.66843	9.988e-15	6.92409e-12	15.4499	192.835	-3.63887	4.6696e-51	9.55027e-47	21.5821	190.165	-3.13795	1.12549e-30	2.53303e-27	216.686	191.839	0.175659	0.268322	0.999695	Chac1	2	119351229	119354381	+	1637	protein_coding	ChaC, cation transport regulator 1 [Source:MGI Symbol;Acc:MGI:1916315]	-
ENSMUSG00000038530	446.055	803.992	-0.849445	1.46978e-14	9.8495e-12	680.571	458.846	0.568538	0.00125557	0.0593949	819.487	452.685	0.855928	6.96024e-16	3.72969e-13	613.34	456.644	0.425646	0.00433456	0.713608	Rgs4	1	169741477	169747642	-	3098	protein_coding	regulator of G-protein signaling 4 [Source:MGI Symbol;Acc:MGI:108409]	-
ENSMUSG00000029088	297.224	590.032	-0.988833	2.35881e-14	1.52972e-11	320.423	305.707	0.0670306	0.56035	0.919806	310.043	301.644	0.0381692	0.732439	0.953569	294.275	304.264	-0.0478731	0.578476	0.999695	Kcnip4	5	48389502	49524907	-	3627	protein_coding	Kv channel interacting protein 4 [Source:MGI Symbol;Acc:MGI:1933131]	-
ENSMUSG00000022523	508.607	994.587	-0.967291	3.86691e-14	2.42939e-11	517.244	523.151	-0.0166385	0.891608	0.980959	655.519	516.189	0.344201	0.000426193	0.0190058	520.119	520.648	-0.00169447	0.985185	0.999695	Fgf12	16	28160098	28753068	-	6203	protein_coding	fibroblast growth factor 12 [Source:MGI Symbol;Acc:MGI:109183]	-
ENSMUSG00000029552	208.317	90.9115	1.19935	5.61789e-14	3.42249e-11	177.164	214.289	-0.275115	0.020789	0.304786	169.271	211.415	-0.318182	0.0605272	0.500266	222.677	213.255	0.0620634	0.546606	0.999695	Tes	6	17065149	17105828	+	6835	protein_coding	testis derived transcript [Source:MGI Symbol;Acc:MGI:105081]	-
ENSMUSG00000032515	144.834	49.1878	1.55684	5.93135e-14	3.50717e-11	116.987	148.999	-0.349565	0.161574	0.690955	107.699	146.98	-0.446451	0.0650514	0.513881	152.257	148.281	0.0371006	0.782576	0.999695	Csrnp1	9	119971163	119984658	-	3473	protein_coding	cysteine-serine-rich nuclear protein 1 [Source:MGI Symbol;Acc:MGI:2387989]	-
ENSMUSG00000049796	61.1566	13.551	2.17587	2.15937e-13	1.24034e-10	44.9096	62.9446	-0.48507	0.0739456	0.543224	44.0026	62.0734	-0.491759	0.153779	0.684492	49.3309	62.6166	-0.342518	0.135998	0.999695	Crh	3	19693401	19695396	-	1320	protein_coding	corticotropin releasing hormone [Source:MGI Symbol;Acc:MGI:88496]	-
ENSMUSG00000117324	36.6354	2.2345	4.02527	2.9499e-13	1.64735e-10	25.8662	37.6831	-0.540992	0.196403	0.727821	24.1886	37.1798	-0.616695	0.0388221	0.408372	28.325	37.5045	-0.407129	0.0748916	0.999695	AC167169.1	16	96918732	96922160	+	1547	antisense	novel transcript, antisense to Dscam	-
ENSMUSG00000074968	86.7414	239.13	-1.46316	2.95802e-12	1.60725e-09	109.028	89.1835	0.290083	0.215805	0.748053	129.728	88.0285	0.558241	0.0155805	0.25011	81.237	88.7826	-0.127617	0.456722	0.999695	Ano3	2	110655201	110950923	-	7218	protein_coding	anoctamin 3 [Source:MGI Symbol;Acc:MGI:3613666]	-
ENSMUSG00000019558	2157.02	1323.01	0.70494	3.45052e-12	1.82551e-09	1575.44	2219.02	-0.494057	4.06358e-11	5.54056e-08	1617.02	2189.09	-0.436824	1.86739e-10	4.28852e-08	1958.06	2208.27	-0.173554	0.00801204	0.953806	Slc6a8	X	73673150	73682502	+	5210	protein_coding	solute carrier family 6 (neurotransmitter transporter, creatine), member 8 [Source:MGI Symbol;Acc:MGI:2147834]	-
ENSMUSG00000040703	26.4706	75.9333	-1.52308	7.05971e-12	3.63919e-09	46.0964	27.2285	0.761953	0.0034918	0.110334	52.3064	26.8673	0.963168	0.000122852	0.00689503	33.1781	27.0952	0.296117	0.232567	0.999695	Cyp2s1	7	25802475	25816913	-	4938	protein_coding	cytochrome P450, family 2, subfamily s, polypeptide 1 [Source:MGI Symbol;Acc:MGI:1921384]	-
ENSMUSG00000023905	328.779	70.2057	2.22591	7.83892e-12	3.93216e-09	258.592	338.407	-0.388167	0.14209	0.66882	172.579	333.653	-0.949709	0.000169718	0.00890365	302.14	336.681	-0.156166	0.426776	0.999695	Tnfrsf12a	17	23675445	23677468	-	1932	protein_coding	tumor necrosis factor receptor superfamily, member 12a [Source:MGI Symbol;Acc:MGI:1351484]	-
ENSMUSG00000022044	473.217	181.864	1.37884	8.01923e-12	3.93216e-09	593.295	486.988	0.284812	0.112802	0.62502	547.595	480.282	0.189	0.13177	0.658443	594.996	484.504	0.296369	0.0178685	0.999695	Stmn4	14	66344296	66361680	+	1916	protein_coding	stathmin-like 4 [Source:MGI Symbol;Acc:MGI:1931224]	-
ENSMUSG00000036815	90.9272	218.412	-1.26483	1.0667e-11	5.10593e-09	118.042	93.5344	0.336495	0.0490749	0.45914	152.325	92.2901	0.722687	5.29958e-05	0.00344718	105.974	93.0724	0.188299	0.23244	0.999695	Dpp10	1	123321471	124045559	-	15784	protein_coding	dipeptidylpeptidase 10 [Source:MGI Symbol;Acc:MGI:2442409]	-
ENSMUSG00000000555	140.209	58.2355	1.27203	1.30472e-11	6.10003e-09	112.296	144.233	-0.361973	0.015262	0.263185	90.113	142.29	-0.658638	5.12359e-06	0.000476493	142.196	143.54	-0.0150557	0.895043	0.999695	Itga5	15	103344286	103366763	-	4933	protein_coding	integrin alpha 5 (fibronectin receptor alpha) [Source:MGI Symbol;Acc:MGI:96604]	-
ENSMUSG00000087006	898.89	215.967	2.05669	1.76674e-11	8.07239e-09	358.211	925.064	-1.36855	1.59234e-12	3.25665e-09	347.827	912.254	-1.38978	2.09398e-11	5.54437e-09	532.1	920.395	-0.790279	1.34619e-06	0.00156616	Gm13889	2	93955810	93957201	-	1392	protein_coding	predicted gene 13889 [Source:MGI Symbol;Acc:MGI:3652053]	-
ENSMUSG00000030272	493.561	261.368	0.915858	1.86058e-11	8.31223e-09	342.653	507.831	-0.567351	2.81504e-07	0.00012794	299.884	500.912	-0.739258	6.34456e-09	1.14232e-06	424.849	505.316	-0.249765	0.0134095	0.999695	Camk1	6	113334124	113343984	-	5975	protein_coding	calcium/calmodulin-dependent protein kinase I [Source:MGI Symbol;Acc:MGI:1098535]	-
ENSMUSG00000004891	255.375	98.2954	1.37907	2.33963e-11	1.02252e-08	208.682	262.666	-0.332499	0.156021	0.684626	115.047	259.139	-1.16877	4.15271e-07	5.10715e-05	188.084	261.446	-0.475585	0.00421682	0.712093	Nes	3	87971078	87980451	+	6416	protein_coding	nestin [Source:MGI Symbol;Acc:MGI:101784]	-
ENSMUSG00000037447	295.604	137.233	1.1079	8.24749e-11	3.52782e-08	340.166	304.02	0.161846	0.421719	0.870225	319.317	299.986	0.0909985	0.442898	0.873272	320.899	302.604	0.0848488	0.567136	0.999695	Arid5a	1	36307733	36324029	+	12540	protein_coding	AT rich interactive domain 5A (MRF1-like) [Source:MGI Symbol;Acc:MGI:2443039]	ARID
ENSMUSG00000025432	87.4315	28.2576	1.62888	8.44692e-11	3.53785e-08	29.3406	89.9615	-1.61428	2.32913e-13	5.29283e-10	24.3013	88.7402	-1.8665	9.15362e-14	3.67877e-11	36.2999	89.5051	-1.30045	2.14646e-08	3.74578e-05	Avil	10	127000709	127020994	+	3398	protein_coding	advillin [Source:MGI Symbol;Acc:MGI:1333798]	-
ENSMUSG00000053398	317.654	108.901	1.54307	1.48089e-10	6.07586e-08	64.0271	326.963	-2.35077	3.19937e-23	1.09056e-19	58.641	322.396	-2.45861	2.46319e-33	7.91951e-30	367.232	325.258	0.175357	0.250516	0.999695	Phgdh	3	98313170	98339990	-	2486	protein_coding	3-phosphoglycerate dehydrogenase [Source:MGI Symbol;Acc:MGI:1355330]	-
ENSMUSG00000021062	491.248	264.603	0.892285	2.42207e-10	9.73867e-08	343.55	505.374	-0.556566	2.00672e-05	0.00380013	363.453	498.536	-0.455038	0.000479772	0.0209665	464.06	502.942	-0.116102	0.227122	0.999695	Rab15	12	76797960	76822908	-	4614	protein_coding	RAB15, member RAS oncogene family [Source:MGI Symbol;Acc:MGI:1916865]	-
ENSMUSG00000060882	76.9713	168.255	-1.12703	2.55297e-10	1.00637e-07	88.3113	79.1555	0.15676	0.422349	0.87065	116.841	78.1083	0.576531	0.00144372	0.0494643	92.0116	78.7973	0.223513	0.202619	0.999695	Kcnd2	6	21215503	21729805	+	5152	protein_coding	potassium voltage-gated channel, Shal-related family, member 2 [Source:MGI Symbol;Acc:MGI:102663]	-
ENSMUSG00000064329	591.995	1210.31	-1.03155	2.74031e-10	1.05944e-07	568.108	608.669	-0.0997092	0.53655	0.916033	934.883	600.783	0.637793	2.51619e-06	0.000256241	611.122	605.927	0.0122981	0.918606	0.999695	Scn1a	2	66270778	66440840	-	11146	protein_coding	sodium channel, voltage-gated, type I, alpha [Source:MGI Symbol;Acc:MGI:98246]	-
ENSMUSG00000033595	151.481	297.411	-0.973287	3.2637e-10	1.23799e-07	192.154	155.828	0.302295	0.0226371	0.318847	227.548	153.723	0.564939	0.000177646	0.00925489	161.418	155.09	0.0576471	0.658415	0.999695	Lgi3	14	70530685	70538324	+	3899	protein_coding	leucine-rich repeat LGI family, member 3 [Source:MGI Symbol;Acc:MGI:2182619]	-
ENSMUSG00000093536	57.2904	127.483	-1.15235	5.13489e-10	1.9117e-07	86.7468	58.9197	0.555653	0.0141387	0.252545	102.227	58.1347	0.811569	1.28726e-05	0.00102371	68.0154	58.6508	0.212814	0.247785	0.999695	Smim17	7	6398715	6432093	+	3683	protein_coding	small integral membrane protein 17 [Source:MGI Symbol;Acc:MGI:4365374]	-
ENSMUSG00000003657	1917.04	3157.37	-0.719971	6.58142e-10	2.40569e-07	1644.09	1972.43	-0.262522	0.0142932	0.253754	1792.95	1945.64	-0.117717	0.163385	0.694537	1906.54	1962.65	-0.0416993	0.631719	0.999695	Calb2	8	110137502	110168210	-	1743	protein_coding	calbindin 2 [Source:MGI Symbol;Acc:MGI:101914]	-
ENSMUSG00000048899	517.738	830.194	-0.681516	8.6358e-10	3.10025e-07	591.843	532.438	0.152531	0.0903976	0.583647	702.874	525.426	0.419704	1.4881e-05	0.00116289	527.237	529.972	-0.00711585	0.927174	0.999695	Rimkla	4	119465283	119492628	-	4158	protein_coding	ribosomal modification protein rimK-like family member A [Source:MGI Symbol;Acc:MGI:3040686]	-
ENSMUSG00000034683	0.986925	23.7306	-4.60176	8.94899e-10	3.15632e-07	2.96054	1.01792	1.5475	0.191961	1	5.32456	1.00248	2.41284	0.0389628	0.409	0.989386	1.01066	-0.0231068	0.986187	1	Ppp1r1c	2	79707780	79818496	+	5826	protein_coding	protein phosphatase 1, regulatory inhibitor subunit 1C [Source:MGI Symbol;Acc:MGI:1923185]	-
ENSMUSG00000036585	382.149	603.422	-0.658708	1.07331e-09	3.72032e-07	333.137	392.999	-0.238466	0.0319752	0.380439	492.346	387.818	0.342781	0.000863809	0.0334611	396.103	391.183	0.0182812	0.861942	0.999695	Fgf1	18	38838673	38929404	-	4648	protein_coding	fibroblast growth factor 1 [Source:MGI Symbol;Acc:MGI:95515]	-
ENSMUSG00000017737	160.217	301.582	-0.912061	1.35531e-09	4.61816e-07	205.265	164.827	0.315719	0.0203583	0.302187	214.863	162.606	0.401989	0.00283532	0.082444	177.302	164.019	0.111545	0.402931	0.999695	Mmp9	2	164940780	164955850	+	3539	protein_coding	matrix metallopeptidase 9 [Source:MGI Symbol;Acc:MGI:97011]	-
ENSMUSG00000032452	213.501	409.266	-0.938769	2.23339e-09	7.48335e-07	245.177	219.597	0.159163	0.266664	0.790063	300.89	216.686	0.473031	0.000787843	0.0313844	204.29	218.54	-0.0959758	0.49598	0.999695	Clstn2	9	97444395	98033181	-	5691	protein_coding	calsyntenin 2 [Source:MGI Symbol;Acc:MGI:1929897]	-
ENSMUSG00000034394	96.0811	18.6216	2.36961	2.99871e-09	9.85481e-07	68.549	98.7862	-0.528577	0.0805541	0.559691	24.5679	97.4834	-1.98463	3.64628e-07	4.53387e-05	64.7512	98.3589	-0.603829	0.0527257	0.999695	Lif	11	4257557	4272514	+	4350	protein_coding	leukemia inhibitory factor [Source:MGI Symbol;Acc:MGI:96787]	-
ENSMUSG00000024907	44.0996	7.19116	2.6089	3.03919e-09	9.85481e-07	103.069	45.4063	1.18299	0.0269867	0.348002	78.4804	44.7578	0.810841	NA	1	79.2712	45.1633	0.811937	0.0254856	0.999695	Gal	19	3409919	3414472	-	712	protein_coding	galanin [Source:MGI Symbol;Acc:MGI:95637]	-
ENSMUSG00000059854	3.50291	26.4661	-2.91128	4.27486e-09	1.36415e-06	8.8315	3.60167	1.29005	0.018014	0.28275	14.4699	3.55499	2.01998	0.000156324	0.00829769	7.86253	3.58543	1.13329	0.0584172	1	Hydin	8	110266977	110610253	+	18037	protein_coding	HYDIN, axonemal central pair apparatus protein [Source:MGI Symbol;Acc:MGI:2389007]	-
ENSMUSG00000039114	195.795	340.374	-0.797459	4.80823e-09	1.51038e-06	170.688	201.419	-0.238975	0.292496	0.809603	253.81	198.705	0.354358	0.0216438	0.299203	246.577	200.45	0.298985	0.0647998	0.999695	Nrn1	13	36725361	36735131	-	2249	protein_coding	neuritin 1 [Source:MGI Symbol;Acc:MGI:1915654]	-
ENSMUSG00000040373	385.783	590.777	-0.615017	5.81844e-09	1.7996e-06	467.912	396.811	0.237737	0.0154288	0.264059	491.776	391.521	0.329433	0.000192326	0.00988237	399.687	394.92	0.0181509	0.839523	0.999695	Cacng5	11	107874605	107915055	-	3834	protein_coding	calcium channel, voltage-dependent, gamma subunit 5 [Source:MGI Symbol;Acc:MGI:2157946]	-
ENSMUSG00000047963	105.455	38.1808	1.46722	6.39621e-09	1.92938e-06	39.9672	108.581	-1.44091	5.34884e-10	5.46972e-07	22.2505	107.037	-2.2557	2.78111e-14	1.1591e-11	39.6706	107.987	-1.44168	7.45879e-08	0.000108469	Stbd1	5	92603041	92606579	+	2221	protein_coding	starch binding domain 1 [Source:MGI Symbol;Acc:MGI:1261768]	-
ENSMUSG00000032564	90.892	180.173	-0.988011	6.43e-09	1.92938e-06	90.6047	93.4604	-0.043708	0.822751	0.971246	116.424	92.243	0.334366	0.0577967	0.489748	97.2143	93.0343	0.0650982	0.713569	0.999695	Cpne4	9	104547286	105034544	+	5499	protein_coding	copine IV [Source:MGI Symbol;Acc:MGI:1921270]	-
ENSMUSG00000020875	16.2972	0	6.46386	1.15146e-08	3.40427e-06	0.19295	16.7725	-5.95844	5.41538e-09	4.25982e-06	0.482007	16.5445	-5.05255	6.51796e-06	0.000575268	11.3216	16.6817	-0.558972	0.233985	0.999695	Hoxb9	11	96271457	96276595	+	2574	protein_coding	homeobox B9 [Source:MGI Symbol;Acc:MGI:96190]	Homeobox
ENSMUSG00000048440	276.449	159.669	0.792182	1.19701e-08	3.48762e-06	230.385	284.376	-0.304043	0.0122292	0.235289	227.732	280.546	-0.298775	0.0577862	0.489748	305.513	283.021	0.109911	0.30068	0.999695	Cyp4f16	17	32536558	32551798	+	3017	protein_coding	cytochrome P450, family 4, subfamily f, polypeptide 16 [Source:MGI Symbol;Acc:MGI:1917351]	-
ENSMUSG00000026347	131.023	244.567	-0.90024	1.34526e-08	3.8636e-06	108.284	134.818	-0.315205	0.153262	0.68029	126.706	132.97	-0.0681739	0.665271	0.941828	140.425	134.153	0.0665082	0.675816	0.999695	Tmem163	1	127486546	127679548	-	4292	protein_coding	transmembrane protein 163 [Source:MGI Symbol;Acc:MGI:1919410]	-
ENSMUSG00000037259	1242.13	1728.89	-0.47716	1.41071e-08	3.98267e-06	1516.55	1277.64	0.247283	0.0483814	0.456831	1862.24	1260.61	0.562506	3.94926e-09	7.28542e-07	1298.9	1271.56	0.0306189	0.652454	0.999695	Dzank1	2	144470557	144527414	-	8262	protein_coding	double zinc ribbon and ankyrin repeat domains 1 [Source:MGI Symbol;Acc:MGI:2139080]	-
ENSMUSG00000029135	201.59	113.476	0.829675	1.42634e-08	3.98267e-06	184.426	207.375	-0.169247	0.272923	0.795098	146.704	204.594	-0.477284	0.0133645	0.229358	204.941	206.368	-0.00980453	0.93745	0.999695	Fosl2	5	32135801	32157842	+	9680	protein_coding	fos-like antigen 2 [Source:MGI Symbol;Acc:MGI:102858]	TF_bZIP
ENSMUSG00000009734	83.6003	169.473	-1.0191	1.75171e-08	4.82415e-06	101.867	85.9485	0.243996	0.162703	0.691973	132.276	84.8371	0.640081	0.000206639	0.0105218	80.8649	85.5708	-0.0811957	0.648511	0.999695	Pou6f2	13	18121098	18397686	-	6985	protein_coding	POU domain, class 6, transcription factor 2 [Source:MGI Symbol;Acc:MGI:2443631]	Pou
ENSMUSG00000021604	18.2299	84.6041	-2.2125	1.80912e-08	4.91495e-06	32.6117	18.7612	0.795396	0.0827578	0.562834	25.9537	18.5031	0.48725	0.207116	0.741671	14.6412	18.6649	-0.352701	0.409575	0.999695	Irx4	13	73260479	73269608	+	2607	protein_coding	Iroquois homeobox 4 [Source:MGI Symbol;Acc:MGI:1355275]	Homeobox
ENSMUSG00000047261	613.83	353.718	0.795076	1.97411e-08	5.29166e-06	471.867	631.675	-0.42086	0.0225131	0.318201	515.403	622.956	-0.272832	0.195782	0.728985	581.134	628.51	-0.11288	0.463041	0.999695	Gap43	16	42248442	42340651	-	1523	protein_coding	growth associated protein 43 [Source:MGI Symbol;Acc:MGI:95639]	-
ENSMUSG00000112854	14.9374	0	6.34206	2.1101e-08	5.58178e-06	1.77823	15.3554	-3.12049	1.40354e-06	0.000503602	1.27638	15.1561	-3.60258	5.94144e-06	0.000536126	6.65509	15.2897	-1.19544	0.0139781	0.999695	Gm38403	10	118920381	118927143	-	2357	lincRNA	predicted gene, 38403 [Source:MGI Symbol;Acc:MGI:5621288]	-
ENSMUSG00000070604	201.975	108.311	0.897412	2.33864e-08	6.10599e-06	197.868	207.751	-0.0711243	0.488881	0.897821	170.889	204.978	-0.26001	0.1885	0.72201	191.772	206.763	-0.109317	0.400371	0.999695	Vsig10l	7	43463151	43472019	+	4075	protein_coding	V-set and immunoglobulin domain containing 10 like [Source:MGI Symbol;Acc:MGI:1922940]	-
ENSMUSG00000112058	24.0626	1.47596	4.00364	2.55503e-08	6.58541e-06	5.28251	24.7561	-2.22284	1.81824e-06	0.000609616	5.37225	24.425	-2.16618	1.43506e-05	0.00112928	20.43	24.6307	-0.265671	0.378172	0.999695	Gm47593	10	61496600	61499601	-	873	antisense	predicted gene, 47593 [Source:MGI Symbol;Acc:MGI:6096640]	-
ENSMUSG00000024206	496.713	267.388	0.894093	2.80056e-08	7.1269e-06	539.845	510.984	0.0789014	0.496076	0.90117	339.945	504.091	-0.567194	0.000831319	0.032824	488.134	508.528	-0.0594363	0.612797	0.999695	Rfx2	17	56775897	56831013	-	7311	protein_coding	regulatory factor X, 2 (influences HLA class II expression) [Source:MGI Symbol;Acc:MGI:106583]	RFX
ENSMUSG00000040424	219.025	109.99	0.991747	2.95929e-08	7.43671e-06	126.618	225.307	-0.831702	6.21201e-05	0.00830379	159.207	222.276	-0.479693	0.00684281	0.150248	198.352	224.227	-0.176412	0.184516	0.999695	Hipk4	7	27523267	27531175	+	3646	protein_coding	homeodomain interacting protein kinase 4 [Source:MGI Symbol;Acc:MGI:2685008]	-
ENSMUSG00000027971	30.974	86.2334	-1.47398	3.36335e-08	8.34774e-06	28.5429	31.8412	-0.157408	0.563826	0.921256	43.6044	31.4328	0.469664	0.074343	0.54327	27.0489	31.7018	-0.229122	0.378275	0.999695	Ndst4	3	125404076	125728899	+	11720	protein_coding	N-deacetylase/N-sulfotransferase (heparin glucosaminyl) 4 [Source:MGI Symbol;Acc:MGI:1932545]	-
ENSMUSG00000038602	287.357	523.252	-0.865048	4.64133e-08	1.13792e-05	296.21	295.541	0.00368022	0.977283	0.996588	323.339	291.648	0.149438	0.23841	0.766851	297.85	294.142	0.018538	0.872375	0.999695	Slc35f1	10	52690533	53111622	+	4941	protein_coding	solute carrier family 35, member F1 [Source:MGI Symbol;Acc:MGI:2139810]	-
ENSMUSG00000078161	98.3257	171.785	-0.804212	5.12391e-08	1.2411e-05	122.298	101.119	0.272469	0.0547837	0.477798	134.557	99.7867	0.427567	0.00848747	0.172504	102.428	100.649	0.0250451	0.859887	0.999695	Erich3	3	154663859	154767790	+	8963	protein_coding	glutamate rich 3 [Source:MGI Symbol;Acc:MGI:1919095]	-
ENSMUSG00000005413	127.384	63.2049	1.01015	5.33019e-08	1.27569e-05	112.476	131.07	-0.222212	0.229691	0.760359	56.5059	129.279	-1.19053	4.15851e-08	6.2813e-06	117.578	130.425	-0.151196	0.375309	0.999695	Hmox1	8	75093621	75100589	+	1751	protein_coding	heme oxygenase 1 [Source:MGI Symbol;Acc:MGI:96163]	-
ENSMUSG00000032946	112.259	220.93	-0.976367	6.05153e-08	1.43129e-05	104.403	115.52	-0.146656	0.397221	0.861981	109.578	113.937	-0.0551018	0.779396	0.963598	96.1294	114.935	-0.259348	0.103417	0.999695	Rasgrp2	19	6399340	6415216	+	12384	protein_coding	RAS, guanyl releasing protein 2 [Source:MGI Symbol;Acc:MGI:1333849]	-
ENSMUSG00000115424	1.962	19.3232	-3.30406	6.55358e-08	1.53201e-05	6.4135	2.01504	1.67695	0.0276141	0.352421	7.91898	1.99144	1.99746	0.010133	0.191544	3.53755	2.00692	0.823918	0.347566	1	D130079A08Rik	14	104288431	104459336	-	7110	lincRNA	RIKEN cDNA D130079A08 gene [Source:MGI Symbol;Acc:MGI:2444500]	-
ENSMUSG00000052684	1200.59	683.185	0.813478	7.03067e-08	1.62465e-05	1294.39	1235.21	0.0673707	0.655829	0.94219	1214	1218.38	-0.00518756	0.971171	0.995095	1277.89	1229.24	0.0558408	0.642575	0.999695	Jun	4	95049034	95052222	-	3189	protein_coding	jun proto-oncogene [Source:MGI Symbol;Acc:MGI:96646]	TF_bZIP
ENSMUSG00000053113	317.452	135.161	1.23262	7.69427e-08	1.75779e-05	357.591	326.704	0.129992	0.568409	0.922444	205.993	322.164	-0.644594	0.19902	0.733203	324.759	325.055	-0.0015855	0.99571	0.999695	Socs3	11	117966079	117970047	-	2891	protein_coding	suppressor of cytokine signaling 3 [Source:MGI Symbol;Acc:MGI:1201791]	-
ENSMUSG00000112080	21.7064	0.74826	4.85244	8.48488e-08	1.91663e-05	4.89957	22.342	-2.18819	0.0012719	0.0597999	6.57411	22.0312	-1.75841	9.50919e-05	0.0055444	18.7836	22.2253	-0.241169	0.416363	0.999695	Gm47595	10	61494917	61496290	-	392	antisense	predicted gene, 47595 [Source:MGI Symbol;Acc:MGI:6096644]	-
ENSMUSG00000022594	1806.44	2452.98	-0.441447	8.88588e-08	1.98491e-05	2230.73	1858.18	0.263602	0.0471863	0.453325	2407.62	1833.3	0.393442	0.00106941	0.03937	2079.13	1849.29	0.168993	0.0333902	0.999695	Lynx1	15	74747852	74753046	-	4662	protein_coding	Ly6/neurotoxin 1 [Source:MGI Symbol;Acc:MGI:1345180]	-
ENSMUSG00000070304	606.775	873.988	-0.526547	1.25857e-07	2.78048e-05	673.521	624.102	0.110171	0.245002	0.768937	721.907	615.786	0.228093	0.00367937	0.0983466	627.641	621.157	0.0147156	0.828055	0.999695	Scn2b	9	45117782	45130070	+	4656	protein_coding	sodium channel, voltage-gated, type II, beta [Source:MGI Symbol;Acc:MGI:106921]	-
ENSMUSG00000030337	735.127	1260.34	-0.777872	1.4667e-07	3.20505e-05	698.858	756.089	-0.113638	0.252454	0.776488	807.747	746.039	0.114675	0.208022	0.742779	770.144	752.54	0.0331458	0.673537	0.999695	Vamp1	6	125215551	125245964	+	10167	protein_coding	vesicle-associated membrane protein 1 [Source:MGI Symbol;Acc:MGI:1313276]	-
ENSMUSG00000004098	183.614	77.0182	1.25259	1.64273e-07	3.55113e-05	181.519	188.968	-0.0566817	0.789456	0.965584	187.767	186.367	0.0133146	0.948572	0.992355	209.968	187.982	0.160905	0.292591	0.999695	Col5a3	9	20770050	20815067	-	6809	protein_coding	collagen, type V, alpha 3 [Source:MGI Symbol;Acc:MGI:1858212]	-
ENSMUSG00000038418	721.589	413.495	0.803206	1.92882e-07	4.12521e-05	932.176	742.129	0.329008	0.0691964	0.526488	475.793	732.236	-0.621739	9.26343e-05	0.00542924	660.996	738.715	-0.160399	0.562759	0.999695	Egr1	18	34859823	34864984	+	4484	protein_coding	early growth response 1 [Source:MGI Symbol;Acc:MGI:95295]	zf-C2H2
ENSMUSG00000026576	3392.81	4417.4	-0.380687	2.14252e-07	4.53402e-05	3656.73	3490.09	0.0672702	0.485065	0.896472	4514.67	3443.33	0.390497	2.96056e-09	5.64664e-07	3359.17	3473.27	-0.0481289	0.397453	0.999695	Atp1b1	1	164437109	164458355	-	3081	protein_coding	ATPase, Na+/K+ transporting, beta 1 polypeptide [Source:MGI Symbol;Acc:MGI:88108]	-
ENSMUSG00000026452	375.05	539.786	-0.525465	2.25032e-07	4.71255e-05	418.774	385.811	0.118184	0.224519	0.755366	409.227	380.633	0.10601	0.326709	0.822411	413.092	383.943	0.106052	0.274451	0.999695	Syt2	1	134646677	134762593	+	7638	protein_coding	synaptotagmin II [Source:MGI Symbol;Acc:MGI:99666]	-
ENSMUSG00000050447	195.615	325.693	-0.735336	2.48455e-07	5.14941e-05	243.637	201.212	0.27615	0.0208723	0.305132	258.484	198.53	0.382618	0.00223227	0.0695488	204.198	200.241	0.0286342	0.780574	0.999695	Lypd6	2	50066429	50193569	+	3729	protein_coding	LY6/PLAUR domain containing 6 [Source:MGI Symbol;Acc:MGI:2443848]	-
ENSMUSG00000027273	12277.6	15488.8	-0.335224	4.60362e-07	9.444e-05	13472.2	12629.5	0.0931888	0.130606	0.650551	14496.8	12460.5	0.218308	7.42142e-06	0.000639948	13105.7	12568.5	0.0604203	0.0878089	0.999695	Snap25	2	136713453	136782428	+	6791	protein_coding	synaptosomal-associated protein 25 [Source:MGI Symbol;Acc:MGI:98331]	-
ENSMUSG00000055409	133.381	212.111	-0.667838	5.09849e-07	0.000103535	146.857	137.193	0.099165	0.532017	0.914021	174.459	135.358	0.367259	0.0116725	0.210666	138.644	136.547	0.0227794	0.87194	0.999695	Nell1	7	49974864	50866608	+	7271	protein_coding	NEL-like 1 [Source:MGI Symbol;Acc:MGI:2443902]	-
ENSMUSG00000029108	573.845	870.939	-0.601562	5.58156e-07	0.000112212	626.307	590.161	0.0857694	0.412265	0.865921	600.587	582.358	0.043237	0.713174	0.95087	578.148	587.43	-0.0229283	0.798813	0.999695	Pcdh7	5	57717967	58133230	+	10604	protein_coding	protocadherin 7 [Source:MGI Symbol;Acc:MGI:1860487]	-
ENSMUSG00000116582	44.324	14.521	1.60999	7.14761e-07	0.000142273	48.3963	45.6164	0.0879002	0.708739	0.954506	26.0347	44.9842	-0.787131	0.00419951	0.108637	39.9986	45.3849	-0.184696	0.476965	0.999695	AC160759.1	16	90667439	90677000	-	1825	lincRNA	novel transcript	-
ENSMUSG00000038591	17.6115	0.746723	4.55108	7.31914e-07	0.000144259	1.97239	18.108	-3.20394	3.41568e-08	2.13806e-05	5.66984	17.8718	-1.64741	0.00039196	0.0178934	9.61705	18.0279	-0.899842	0.0233076	0.999695	Colec10	15	54410774	54466358	+	4587	protein_coding	collectin sub-family member 10 [Source:MGI Symbol;Acc:MGI:3606482]	-
ENSMUSG00000060371	310.786	550.628	-0.825397	7.686e-07	0.000150019	326.049	319.526	0.0290535	0.855162	0.977086	465.687	315.401	0.5618	0.000388359	0.0177651	326.961	318.092	0.0397822	0.78537	0.999695	Caln1	5	130369455	130847412	+	10483	protein_coding	calneuron 1 [Source:MGI Symbol;Acc:MGI:2155987]	-
ENSMUSG00000026483	337.064	112.276	1.58714	9.53117e-07	0.000184245	240.609	346.406	-0.525705	0.15205	0.678245	117.569	342.022	-1.54154	0.000933078	0.0354727	255.818	344.98	-0.431329	0.0288353	0.999695	Fam129a	1	151571186	151721939	+	7380	protein_coding	family with sequence similarity 129, member A [Source:MGI Symbol;Acc:MGI:2137237]	-
ENSMUSG00000030785	13.4425	0.256772	5.46742	9.8328e-07	0.000188265	1.75033	13.8372	-2.97422	9.07819e-06	0.00213411	1.23452	13.6425	-3.4586	1.14335e-05	0.000925617	6.81927	13.7656	-1.00524	0.0557488	0.999695	Cox6a2	7	128205435	128206387	-	680	protein_coding	cytochrome c oxidase subunit 6A2 [Source:MGI Symbol;Acc:MGI:104649]	-
ENSMUSG00000030847	159.355	93.1858	0.773321	1.09548e-06	0.00020777	177.756	163.896	0.115712	0.399369	0.861981	142.758	161.712	-0.178725	0.321212	0.82071	180.19	163.135	0.143013	0.247325	0.999695	Bag3	7	128523616	128546981	+	2562	protein_coding	BCL2-associated athanogene 3 [Source:MGI Symbol;Acc:MGI:1352493]	-
ENSMUSG00000026833	1438.4	1949.53	-0.438851	1.32201e-06	0.000248389	1770.63	1479.94	0.258828	0.000926195	0.0493685	1855.58	1459.86	0.34583	3.07255e-05	0.00218141	1535.43	1472.61	0.0604576	0.378818	0.999695	Olfm1	2	28192992	28230736	+	3553	protein_coding	olfactomedin 1 [Source:MGI Symbol;Acc:MGI:1860437]	-
ENSMUSG00000026156	100.732	177.897	-0.821348	1.44393e-06	0.000268785	144.955	103.613	0.486268	0.000957948	0.0495993	143.744	102.24	0.493389	0.0012655	0.0450736	117.754	103.108	0.193414	0.181566	0.999695	B3gat2	1	23761753	23849158	+	6203	protein_coding	beta-1,3-glucuronyltransferase 2 (glucuronosyltransferase S) [Source:MGI Symbol;Acc:MGI:2389490]	-
ENSMUSG00000114882	258.517	166.697	0.632486	1.63245e-06	0.000301089	221.424	265.939	-0.265655	0.0151616	0.262698	180.869	262.367	-0.53653	1.5072e-06	0.000162301	252.25	264.649	-0.0700069	0.46353	0.999695	Gm48581	13	47152357	47155008	-	2652	TEC	predicted gene, 48581 [Source:MGI Symbol;Acc:MGI:6098148]	-
ENSMUSG00000029120	759.173	1020.53	-0.427159	2.01636e-06	0.00036656	814.289	780.89	0.0604487	0.512187	0.907597	905.115	770.481	0.233002	0.00321002	0.0899591	819.789	777.147	0.0773938	0.358158	0.999695	Ppp2r2c	5	36868513	36955078	+	4450	protein_coding	protein phosphatase 2, regulatory subunit B, gamma [Source:MGI Symbol;Acc:MGI:2442660]	-
ENSMUSG00000032034	146.652	227.871	-0.636811	2.02388e-06	0.00036656	173.985	150.824	0.206013	0.0905082	0.583751	171.793	148.827	0.205044	0.133716	0.660459	157.683	150.125	0.0715725	0.544736	0.999695	Kcnj5	9	32314707	32344350	-	4685	protein_coding	potassium inwardly-rectifying channel, subfamily J, member 5 [Source:MGI Symbol;Acc:MGI:104755]	-
ENSMUSG00000021303	166.513	300.038	-0.850747	2.09028e-06	0.000375206	171.764	171.245	0.005473	0.974525	0.995756	182.36	168.996	0.109304	0.432463	0.869199	171.947	170.437	0.0134832	0.919227	0.999695	Gng4	13	13784059	13827896	+	3340	protein_coding	guanine nucleotide binding protein (G protein), gamma 4 [Source:MGI Symbol;Acc:MGI:102703]	-
ENSMUSG00000068699	193.348	73.8808	1.39081	2.13108e-06	0.000379144	117.71	198.952	-0.758089	0.000148955	0.0152219	58.4866	196.213	-1.74331	1.39072e-13	5.2166e-11	149.115	197.97	-0.409992	0.0340925	0.999695	Flnc	6	29433256	29461883	+	9402	protein_coding	filamin C, gamma [Source:MGI Symbol;Acc:MGI:95557]	-
ENSMUSG00000015396	71.472	131.409	-0.879333	2.33438e-06	0.00040809	150.227	73.5131	1.03229	7.06649e-07	0.000294947	95.7782	72.5388	0.40235	0.0164101	0.257908	92.1753	73.1621	0.332898	0.0547862	0.999695	Cd83	13	43784775	43803132	+	2572	protein_coding	CD83 antigen [Source:MGI Symbol;Acc:MGI:1328316]	-
ENSMUSG00000001504	19.0613	58.7029	-1.62203	2.32516e-06	0.00040809	25.7572	19.6239	0.390271	0.316715	0.824733	23.3865	19.3455	0.2764	0.436922	0.871027	14.5656	19.5206	-0.421127	0.250672	0.999695	Irx2	13	72628820	72634198	+	3282	protein_coding	Iroquois homeobox 2 [Source:MGI Symbol;Acc:MGI:1197526]	Homeobox
ENSMUSG00000039518	47.9349	16.6459	1.53006	2.49809e-06	0.000432944	21.6884	49.278	-1.18089	1.8827e-05	0.00363254	24.6371	48.6424	-0.981198	0.000439111	0.0194394	24.0515	49.0634	-1.02542	0.000105517	0.0613792	Cdsn	17	35552128	35557180	+	2678	protein_coding	corneodesmosin [Source:MGI Symbol;Acc:MGI:3505689]	-
ENSMUSG00000115149	62.9462	25.7793	1.28832	2.88954e-06	0.000488182	44.4477	64.7227	-0.544655	0.0100614	0.207773	30.2574	63.8749	-1.08269	1.1977e-05	0.000966144	52.5834	64.4331	-0.295969	0.126199	0.999695	9330188P03Rik	14	105589476	105632054	+	4583	processed_transcript	RIKEN cDNA 9330188P03 gene [Source:MGI Symbol;Acc:MGI:2686435]	-
ENSMUSG00000070687	36.1934	72.7241	-1.00869	2.88965e-06	0.000488182	63.2425	37.2242	0.766653	0.000237404	0.0207847	64.1217	36.7316	0.805328	0.000111054	0.00633691	45.489	37.0484	0.294975	0.176001	0.999695	Htr1d	4	136423524	136444398	+	3201	protein_coding	5-hydroxytryptamine (serotonin) receptor 1D [Source:MGI Symbol;Acc:MGI:96276]	-
ENSMUSG00000096498	11.5201	0	5.96502	2.84894e-06	0.000488182	8.14436	11.8303	-0.536586	0.540745	0.916537	5.28275	11.6914	-1.15596	0.497912	0.891765	2.37135	11.7842	-2.31222	0.00320141	1	Ighv2-5	12	113685482	113686045	-	480	IG_V_gene	immunoglobulin heavy variable 2-5 [Source:MGI Symbol;Acc:MGI:4439517]	-
ENSMUSG00000024014	153.116	70.5954	1.11595	2.93434e-06	0.0004916	158.885	157.643	0.0109394	0.963172	0.993332	101.094	155.403	-0.618083	0.0424866	0.423914	164.71	156.8	0.0709457	0.707731	0.999695	Pim1	17	29490812	29496111	+	2638	protein_coding	proviral integration site 1 [Source:MGI Symbol;Acc:MGI:97584]	-
ENSMUSG00000022790	1365.99	994.726	0.457808	3.13721e-06	0.000521244	1266	1405.22	-0.150591	0.0841048	0.567191	1110.73	1386.34	-0.319296	0.00369497	0.0986466	1376.89	1398.41	-0.0224689	0.804217	0.999695	Igsf11	16	38892671	39027159	+	4493	protein_coding	immunoglobulin superfamily, member 11 [Source:MGI Symbol;Acc:MGI:2388477]	-
ENSMUSG00000031799	464.795	322.945	0.525163	3.33919e-06	0.000550254	475.293	478.144	-0.00873035	0.946356	0.990595	414.451	471.708	-0.186015	0.1904	0.723987	452.568	475.836	-0.0719685	0.359446	0.999695	Tpm4	8	72134975	72153142	+	2203	protein_coding	tropomyosin 4 [Source:MGI Symbol;Acc:MGI:2449202]	-
ENSMUSG00000007041	395.002	225.716	0.807445	3.38748e-06	0.000553674	433.696	406.459	0.0938275	0.574599	0.924272	323.168	400.893	-0.309616	0.0795235	0.555594	459.296	404.413	0.183761	0.0746203	0.999695	Clic1	17	35049966	35058749	+	1799	protein_coding	chloride intracellular channel 1 [Source:MGI Symbol;Acc:MGI:2148924]	-
ENSMUSG00000039079	16.3519	2.22347	2.86494	3.70493e-06	0.000600676	8.44248	16.822	-0.996436	0.0242162	0.330842	6.82245	16.594	-1.26965	0.0131175	0.227269	9.09989	16.7412	-0.881164	0.0167024	0.999695	Trhr2	8	122356967	122360746	-	1340	protein_coding	thyrotropin releasing hormone receptor 2 [Source:MGI Symbol;Acc:MGI:2177284]	-
ENSMUSG00000034336	946.432	1333.72	-0.495085	3.87636e-06	0.000618517	1039.06	973.537	0.0939872	0.292536	0.809603	1163.43	960.505	0.276934	0.000101437	0.00586875	952.13	968.89	-0.0250362	0.722285	0.999695	Ina	19	47014698	47025327	+	3240	protein_coding	internexin neuronal intermediate filament protein, alpha [Source:MGI Symbol;Acc:MGI:96568]	-
ENSMUSG00000001435	864.231	367.052	1.23564	3.8765e-06	0.000618517	869.709	888.557	-0.0309454	0.93191	0.989084	476.577	876.999	-0.879958	0.0033183	0.0920762	1030.06	884.651	0.219528	0.374697	0.999695	Col18a1	10	77052178	77166548	-	7021	protein_coding	collagen, type XVIII, alpha 1 [Source:MGI Symbol;Acc:MGI:88451]	-
ENSMUSG00000007594	102.164	196.822	-0.947216	4.11903e-06	0.000652039	72.8346	105.129	-0.527305	0.00212261	0.0823748	82.2768	103.692	-0.332342	0.0405037	0.415601	93.8525	104.595	-0.154333	0.30392	0.999695	Hapln4	8	70083457	70090862	+	3924	protein_coding	hyaluronan and proteoglycan link protein 4 [Source:MGI Symbol;Acc:MGI:2679531]	-
ENSMUSG00000036699	224.528	138.383	0.697613	4.35314e-06	0.000678416	124.976	230.962	-0.885572	1.05201e-10	1.26562e-07	159.324	227.86	-0.51558	3.73826e-05	0.00258077	216.022	229.856	-0.0891451	0.451201	0.999695	Zcchc12	X	36195904	36199158	+	2280	protein_coding	zinc finger, CCHC domain containing 12 [Source:MGI Symbol;Acc:MGI:1919943]	-
ENSMUSG00000051029	1.37901	14.0873	-3.36046	4.33346e-06	0.000678416	1.55287	1.41668	0.142503	0.905908	1	3.12191	1.39952	1.17916	0.277293	0.796224	1.98124	1.41104	0.495455	0.617301	1	Serpinb1b	13	33078575	33094380	+	1926	protein_coding	serine (or cysteine) peptidase inhibitor, clade B, member 1b [Source:MGI Symbol;Acc:MGI:2445361]	-
ENSMUSG00000026473	22051.1	27884.5	-0.338599	4.47111e-06	0.00069144	19709.1	22684.2	-0.20282	0.118992	0.635411	23350.6	22378.9	0.061286	0.589022	0.921102	23375.7	22574.9	0.0502867	0.585771	0.999695	Glul	1	153899944	153909723	+	3323	protein_coding	glutamate-ammonia ligase (glutamine synthetase) [Source:MGI Symbol;Acc:MGI:95739]	-
ENSMUSG00000042182	478.802	730.867	-0.610089	4.69118e-06	0.000719935	635.987	492.441	0.368774	7.84023e-05	0.00945621	682.347	485.933	0.489074	1.23699e-06	0.000134491	529.931	490.111	0.112915	0.23606	0.999695	Bend6	1	33852052	33907816	-	3421	protein_coding	BEN domain containing 6 [Source:MGI Symbol;Acc:MGI:2444572]	-
ENSMUSG00000048022	60.9278	105.479	-0.790187	4.98096e-06	0.000755433	79.2588	62.6691	0.337659	0.0809546	0.559691	80.575	61.8326	0.38	0.0327051	0.376911	62.3302	62.3735	0.000956703	0.995648	0.999695	Tmem229a	6	24951141	24956297	-	5157	protein_coding	transmembrane protein 229A [Source:MGI Symbol;Acc:MGI:2442812]	-
ENSMUSG00000024143	590.491	405.761	0.541888	4.99764e-06	0.000755433	597.173	607.345	-0.0247071	0.76782	0.962211	640.204	599.265	0.0954899	0.354107	0.837397	620.225	604.483	0.0367887	0.634698	0.999695	Rhoq	17	86963082	87000069	+	4151	protein_coding	ras homolog family member Q [Source:MGI Symbol;Acc:MGI:1931553]	-
ENSMUSG00000035681	608.508	864.247	-0.506323	5.28369e-06	0.000792712	663.572	625.992	0.0841694	0.490589	0.898669	770.352	617.581	0.318526	0.000835459	0.0329118	608.581	622.931	-0.032843	0.706425	0.999695	Kcnc2	10	112271121	112467024	+	7138	protein_coding	potassium voltage gated channel, Shaw-related subfamily, member 2 [Source:MGI Symbol;Acc:MGI:96668]	-
ENSMUSG00000014846	358.224	752.277	-1.07035	5.59088e-06	0.000832585	448.629	368.828	0.282497	0.244941	0.768937	453.797	363.566	0.320091	0.181138	0.713671	404.981	366.857	0.142548	0.469942	0.999695	Tppp3	8	105467493	105471526	-	1848	protein_coding	tubulin polymerization-promoting protein family member 3 [Source:MGI Symbol;Acc:MGI:1915221]	-
ENSMUSG00000036578	39.7233	99.1077	-1.32107	5.76816e-06	0.00085267	68.6747	40.8725	0.749923	0.0108075	0.217984	79.8834	40.3154	0.990066	0.000423616	0.0189541	53.3928	40.6703	0.394353	0.0589496	0.999695	Fxyd7	7	31042513	31051467	-	693	protein_coding	FXYD domain-containing ion transport regulator 7 [Source:MGI Symbol;Acc:MGI:1889006]	-
ENSMUSG00000093930	1191.87	1666.93	-0.48409	6.25639e-06	0.00091809	1132.91	1225.96	-0.114147	0.289111	0.806369	1375.57	1209.54	0.185481	0.0529294	0.470841	1276.97	1220.16	0.0657466	0.467404	0.999695	Hmgcs1	13	119690379	119708260	+	4594	protein_coding	3-hydroxy-3-methylglutaryl-Coenzyme A synthase 1 [Source:MGI Symbol;Acc:MGI:107592]	-
ENSMUSG00000059003	115.043	212.43	-0.884674	7.38996e-06	0.00107658	148.856	118.269	0.33085	0.0350264	0.397095	203.762	116.742	0.801648	5.40586e-06	0.000498384	129.132	117.752	0.133702	0.458433	0.999695	Grin2a	16	9567898	9995560	-	17933	protein_coding	glutamate receptor, ionotropic, NMDA2A (epsilon 1) [Source:MGI Symbol;Acc:MGI:95820]	-
ENSMUSG00000021613	3.6751	20.6388	-2.47934	7.51442e-06	0.00108683	6.3564	3.78277	0.737318	0.27697	0.798819	7.1025	3.72999	0.911718	0.166029	0.698441	2.77074	3.76308	-0.4476	0.545558	1	Hapln1	13	89539796	89611652	+	5902	protein_coding	hyaluronan and proteoglycan link protein 1 [Source:MGI Symbol;Acc:MGI:1337006]	-
ENSMUSG00000021670	1856.51	2405.58	-0.373769	8.99821e-06	0.00129214	1754.51	1909.41	-0.122213	0.260274	0.785552	2072.3	1884.07	0.137008	0.0913507	0.586406	2013.85	1900.46	0.0836596	0.140251	0.999695	Hmgcr	13	96648967	96670936	-	7275	protein_coding	3-hydroxy-3-methylglutaryl-Coenzyme A reductase [Source:MGI Symbol;Acc:MGI:96159]	-
ENSMUSG00000027978	26.1377	5.45236	2.25358	9.93852e-06	0.00141705	15.9758	26.8671	-0.747836	0.0882524	0.577838	20.3855	26.5191	-0.371306	0.396992	0.85188	27.0851	26.7552	0.0174671	0.958107	0.999695	Prss12	3	123446913	123506597	+	2602	protein_coding	protease, serine 12 neurotrypsin (motopsin) [Source:MGI Symbol;Acc:MGI:1100881]	-
ENSMUSG00000053441	59.4166	19.1318	1.62511	1.03469e-05	0.00146489	89.2507	61.0905	0.547346	0.0607535	0.499409	117.693	60.2981	0.966038	1.75798e-05	0.00134552	53.4285	60.815	-0.187307	0.614753	0.999695	Adamts19	18	58836764	59053678	+	4666	protein_coding	a disintegrin-like and metallopeptidase (reprolysin type) with thrombospondin type 1 motif, 19 [Source:MGI Symbol;Acc:MGI:2442875]	-
ENSMUSG00000046203	7.57198	0	5.36175	1.06068e-05	0.00149118	1.56665	7.7971	-2.31537	0.00447551	0.126953	2.2395	7.68434	-1.78209	0.0150506	0.245927	12.5806	7.75507	0.697533	0.135814	0.999695	Sprr2g	3	92373915	92375229	+	651	polymorphic_pseudogene	small proline-rich protein 2G [Source:MGI Symbol;Acc:MGI:1330348]	-
ENSMUSG00000067242	55.4396	106.88	-0.949144	1.14374e-05	0.00159679	65.9385	57.0145	0.211403	0.250803	0.774442	96.5198	56.2681	0.77905	8.96897e-05	0.00528418	59.012	56.745	0.0597367	0.803411	0.999695	Lgi1	19	38264536	38312214	+	11354	protein_coding	leucine-rich repeat LGI family, member 1 [Source:MGI Symbol;Acc:MGI:1861691]	-
ENSMUSG00000034926	920.265	1354.24	-0.557447	1.33662e-05	0.0018532	950.573	946.478	0.00588112	0.955415	0.99139	1219.4	933.879	0.384523	2.26446e-05	0.00167095	913.461	942.087	-0.0446266	0.661024	0.999695	Dhcr24	4	106561038	106589113	+	4028	protein_coding	24-dehydrocholesterol reductase [Source:MGI Symbol;Acc:MGI:1922004]	-
ENSMUSG00000070348	442.579	317.123	0.481647	1.35035e-05	0.00185941	487.352	455.178	0.0976815	0.393046	0.861981	382.588	449.133	-0.230048	0.084983	0.569743	386.159	453.072	-0.230834	0.0505802	0.999695	Ccnd1	7	144929931	144939925	-	4709	protein_coding	cyclin D1 [Source:MGI Symbol;Acc:MGI:88313]	-
ENSMUSG00000036242	118.033	185.82	-0.65351	1.5705e-05	0.00213333	123.034	121.442	0.0199594	0.885317	0.980213	173.864	119.797	0.537614	2.98536e-05	0.00213297	127.371	120.836	0.0758576	0.616627	0.999695	Armh4	14	49675952	49783383	-	9271	protein_coding	armadillo-like helical domain containing 4 [Source:MGI Symbol;Acc:MGI:1914669]	-
ENSMUSG00000043461	19.1148	49.6934	-1.37676	1.56575e-05	0.00213333	23.0161	19.6548	0.225839	0.527151	0.9122	33.0882	19.4001	0.772283	0.0269732	0.337687	19.0568	19.565	-0.0401963	0.910213	0.999695	Sptssb	3	69819542	69859940	-	1826	protein_coding	serine palmitoyltransferase, small subunit B [Source:MGI Symbol;Acc:MGI:1913433]	-
ENSMUSG00000039601	858.99	1140.54	-0.40893	1.6191e-05	0.00218459	1020.41	883.58	0.20796	0.00765643	0.180403	1073.28	871.797	0.299621	8.86842e-05	0.0052663	946.933	879.32	0.107325	0.150694	0.999695	Rcan2	17	43801351	44039516	+	4372	protein_coding	regulator of calcineurin 2 [Source:MGI Symbol;Acc:MGI:1858219]	-
ENSMUSG00000052981	505.445	682.274	-0.43264	1.70227e-05	0.0022815	543.309	520.021	0.0633958	0.51355	0.907597	504.077	512.983	-0.0258366	0.76411	0.96153	497.74	517.451	-0.0556502	0.572381	0.999695	Ube2ql1	13	69702832	69739889	-	2674	protein_coding	ubiquitin-conjugating enzyme E2Q family-like 1 [Source:MGI Symbol;Acc:MGI:1924230]	-
ENSMUSG00000027584	98.447	162.352	-0.722033	1.77485e-05	0.00236301	144.959	101.275	0.516331	0.000113289	0.012457	145.379	99.9111	0.543477	0.0014291	0.0491795	113.312	100.787	0.168319	0.241624	0.999695	Oprl1	2	181715016	181720985	+	3753	protein_coding	opioid receptor-like 1 [Source:MGI Symbol;Acc:MGI:97440]	-
ENSMUSG00000024640	733.755	545.527	0.427247	1.80151e-05	0.00238273	519.014	754.742	-0.539529	1.05996e-09	9.8538e-07	566.991	744.665	-0.394712	3.19067e-06	0.00031634	767.826	751.146	0.0319273	0.65013	0.999695	Psat1	19	15904678	15947337	-	4254	protein_coding	phosphoserine aminotransferase 1 [Source:MGI Symbol;Acc:MGI:2183441]	-
ENSMUSG00000033730	58.0676	23.3472	1.31073	1.87849e-05	0.00246831	29.2638	59.7446	-1.03113	2.46057e-05	0.00422887	20.0638	58.9259	-1.56117	6.78128e-08	9.65946e-06	31.2877	59.4543	-0.927324	0.000199489	0.0967025	Egr3	14	70077203	70082614	+	4406	protein_coding	early growth response 3 [Source:MGI Symbol;Acc:MGI:1306780]	zf-C2H2
ENSMUSG00000021728	300.709	489.706	-0.703442	2.03873e-05	0.00266148	341.394	309.278	0.142714	0.251285	0.775072	354.574	305.196	0.21586	0.107782	0.617305	315.579	307.815	0.0365086	0.752183	0.999695	Emb	13	117208536	117274415	+	6906	protein_coding	embigin [Source:MGI Symbol;Acc:MGI:95321]	-
ENSMUSG00000028893	563.08	381.727	0.559808	2.19236e-05	0.00284356	387.57	579.249	-0.57954	1.85711e-12	3.45287e-09	357.643	571.457	-0.676153	4.1307e-13	1.43024e-10	572.194	576.455	-0.0105829	0.87136	0.999695	Sesn2	4	132492032	132510501	-	3475	protein_coding	sestrin 2 [Source:MGI Symbol;Acc:MGI:2651874]	-
ENSMUSG00000020635	13.9725	41.2788	-1.56082	2.29478e-05	0.00295732	25.0143	14.3794	0.792761	0.0185538	0.286387	27.9542	14.1789	0.97723	0.0065212	0.145457	19.2679	14.3081	0.428847	0.262785	0.999695	Fkbp1b	12	4833174	4841591	-	1021	protein_coding	FK506 binding protein 1b [Source:MGI Symbol;Acc:MGI:1336205]	-
ENSMUSG00000046223	15.9766	1.54969	3.39741	2.33835e-05	0.00299428	11.9309	16.4671	-0.463775	0.349069	0.841187	5.13964	16.2177	-1.65003	0.0157411	0.251975	14.3278	16.3661	-0.194778	0.668573	0.999695	Plaur	7	24462484	24475968	+	2617	protein_coding	plasminogen activator, urokinase receptor [Source:MGI Symbol;Acc:MGI:97612]	-
ENSMUSG00000020427	51.7581	19.5959	1.40209	2.44428e-05	0.00309056	36.33	53.2683	-0.549644	0.0811754	0.559984	31.37	52.5291	-0.741656	0.0864734	0.573922	63.3909	52.999	0.26004	0.343592	0.999695	Igfbp3	11	7206086	7213923	-	3130	protein_coding	insulin-like growth factor binding protein 3 [Source:MGI Symbol;Acc:MGI:96438]	-
ENSMUSG00000041439	732.695	1015.19	-0.470215	2.44297e-05	0.00309056	603.624	753.541	-0.320308	0.00232959	0.086157	761.104	743.581	0.033103	0.697779	0.947972	673.72	750.023	-0.154496	0.0824868	0.999695	Mfsd6	1	52656286	52727462	-	8231	protein_coding	major facilitator superfamily domain containing 6 [Source:MGI Symbol;Acc:MGI:1922925]	-
ENSMUSG00000029661	139.703	74.0004	0.919108	2.46257e-05	0.00309422	229.862	143.631	0.678415	0.0254252	0.338539	108.104	141.769	-0.390206	0.171815	0.704516	192.059	142.996	0.425441	0.0267217	0.999695	Col1a2	6	4504814	4541544	+	12426	protein_coding	collagen, type I, alpha 2 [Source:MGI Symbol;Acc:MGI:88468]	-
ENSMUSG00000031965	19.3274	48.1601	-1.3162	2.6329e-05	0.00328769	13.9075	19.8677	-0.514038	0.133255	0.655287	26.1032	19.6131	0.407634	0.233648	0.763989	22.2784	19.7814	0.172818	0.628094	0.999695	Tbx20	9	24718138	24774303	-	11997	protein_coding	T-box 20 [Source:MGI Symbol;Acc:MGI:1888496]	T-box
ENSMUSG00000040010	1352.01	1051.01	0.363268	2.87635e-05	0.00356952	922.94	1390.79	-0.591215	1.16063e-11	1.82593e-08	837.546	1372.14	-0.713002	1.54192e-16	9.37906e-14	1376.95	1384.07	-0.00721335	0.911378	0.999695	Slc7a5	8	121881150	121907694	-	3708	protein_coding	solute carrier family 7 (cationic amino acid transporter, y+ system), member 5 [Source:MGI Symbol;Acc:MGI:1298205]	-
ENSMUSG00000028036	47.973	13.2475	1.86413	2.92517e-05	0.00360783	32.426	49.351	-0.60892	0.110043	0.621168	15.6368	48.6824	-1.6307	0.000246201	0.0121513	32.9572	49.1159	-0.573616	0.0466079	0.999695	Ptgfr	3	151796502	151837630	-	6778	protein_coding	prostaglandin F receptor [Source:MGI Symbol;Acc:MGI:97796]	-
ENSMUSG00000117003	333.835	225.442	0.566456	3.05228e-05	0.00374165	287.994	343.475	-0.254006	0.0175905	0.278668	248.289	338.799	-0.447904	0.000915345	0.0349165	289.005	341.787	-0.242763	0.0219815	0.999695	CT010496.1	17	66449854	66452599	+	2746	bidirectional_promoter_lncRNA	novel transcript	-
ENSMUSG00000021573	1060.25	1463.74	-0.465067	3.34369e-05	0.00407403	1112.7	1090.39	0.0291875	0.817943	0.970054	1267.26	1076.01	0.235818	0.00581081	0.135803	1063.88	1085.32	-0.0287397	0.723978	0.999695	Tppp	13	74009407	74035753	+	5102	protein_coding	tubulin polymerization promoting protein [Source:MGI Symbol;Acc:MGI:1920198]	-
ENSMUSG00000026778	64.5903	121.03	-0.904128	3.40714e-05	0.00412634	74.0589	66.4138	0.154918	0.458759	0.88586	78.8093	65.5408	0.26179	0.290224	0.80401	73.4906	66.1163	0.150527	0.474518	0.999695	Prkcq	2	11172108	11301222	+	7081	protein_coding	protein kinase C, theta [Source:MGI Symbol;Acc:MGI:97601]	-
ENSMUSG00000029843	118.728	41.4491	1.51922	3.60513e-05	0.00433997	143.854	122.042	0.237207	0.6682	0.944328	56.1703	120.472	-1.10122	0.058175	0.490853	201	121.536	0.725359	0.00828644	0.95766	Slc13a4	6	35267957	35308131	-	4528	protein_coding	solute carrier family 13 (sodium/sulfate symporters), member 4 [Source:MGI Symbol;Acc:MGI:2442367]	-
ENSMUSG00000052837	649.39	275.313	1.23774	3.7633e-05	0.00450342	567.866	668.444	-0.235359	0.447885	0.881003	359.384	658.998	-0.874461	0.0348501	0.387519	625.161	665.035	-0.0893176	0.76595	0.999695	Junb	8	84974484	84978718	-	2301	protein_coding	jun B proto-oncogene [Source:MGI Symbol;Acc:MGI:96647]	TF_bZIP
ENSMUSG00000028222	661.533	939.42	-0.505785	3.83997e-05	0.00456797	802.164	680.504	0.237065	0.0371787	0.408147	827.724	671.389	0.300882	0.00233965	0.0717387	744.166	677.223	0.136015	0.073154	0.999695	Calb1	4	15881264	15908064	+	4846	protein_coding	calbindin 1 [Source:MGI Symbol;Acc:MGI:88248]	-
ENSMUSG00000035547	170.212	259.906	-0.611939	3.90626e-05	0.00459249	217.276	175.123	0.311921	0.00819498	0.186849	236.605	172.755	0.454902	0.000140268	0.00759993	200.907	174.257	0.206561	0.0746329	0.999695	Capn5	7	98121559	98178274	-	5485	protein_coding	calpain 5 [Source:MGI Symbol;Acc:MGI:1100859]	-
ENSMUSG00000035200	99.1864	49.6915	1.00132	3.88376e-05	0.00459249	94.6455	101.967	-0.109043	0.657376	0.942352	69.0195	100.646	-0.543517	0.024133	0.317475	91.1092	101.528	-0.157389	0.366135	0.999695	Chrnb4	9	55028154	55048779	-	3723	protein_coding	cholinergic receptor, nicotinic, beta polypeptide 4 [Source:MGI Symbol;Acc:MGI:87892]	-
ENSMUSG00000041782	298.119	108.994	1.45277	4.47512e-05	0.00523069	269.727	306.716	-0.186036	0.264566	0.789797	109.511	302.556	-1.46378	4.98168e-12	1.45607e-09	249.139	305.214	-0.293614	0.0883677	0.999695	Lad1	1	135818598	135833342	+	3400	protein_coding	ladinin [Source:MGI Symbol;Acc:MGI:109343]	-
ENSMUSG00000025083	51.7872	26.4588	0.966072	5.24787e-05	0.00603843	46.521	53.2821	-0.195516	0.288725	0.806369	30.6656	52.5609	-0.769663	0.00570047	0.134199	43.9203	53.0167	-0.271019	0.191591	0.999695	Afap1l2	19	56912361	57008228	-	5675	protein_coding	actin filament associated protein 1-like 2 [Source:MGI Symbol;Acc:MGI:2147658]	-
ENSMUSG00000049044	258.209	379.959	-0.557333	5.20246e-05	0.00603843	270.749	265.526	0.0270794	0.816956	0.96996	316.299	262.044	0.270677	0.0183477	0.275948	243.945	264.306	-0.114959	0.310642	0.999695	Rapgef4	2	71981240	72257474	+	6677	protein_coding	Rap guanine nucleotide exchange factor (GEF) 4 [Source:MGI Symbol;Acc:MGI:1917723]	-
ENSMUSG00000076538	12.7829	0.263979	5.39482	5.25629e-05	0.00603843	5.34577	13.1191	-1.29915	0.134527	0.65589	4.86376	12.9708	-1.40928	0.144761	0.673556	21.9638	13.0747	0.747045	0.576894	0.999695	Igkv13-84	6	68939602	68940067	+	347	IG_V_gene	immunoglobulin kappa chain variable 13-84 [Source:MGI Symbol;Acc:MGI:96514]	-
ENSMUSG00000036256	353.786	233.831	0.597602	5.63147e-05	0.00643267	453.934	364.016	0.318328	0.0393509	0.418515	283.42	359.041	-0.341055	0.0323364	0.374943	358.018	362.223	-0.0169239	0.884038	0.999695	Igfbp7	5	77349240	77408041	-	1209	protein_coding	insulin-like growth factor binding protein 7 [Source:MGI Symbol;Acc:MGI:1352480]	-
ENSMUSG00000018417	364.186	520.043	-0.514127	5.66721e-05	0.00643692	411.292	374.478	0.134946	0.237939	0.763818	433.217	369.594	0.229223	0.0606994	0.500808	398.435	372.77	0.0965429	0.339928	0.999695	Myo1b	1	51749765	51916071	-	10792	protein_coding	myosin IB [Source:MGI Symbol;Acc:MGI:107752]	-
ENSMUSG00000022762	208.722	410.417	-0.975664	5.73522e-05	0.00647758	234.399	214.584	0.127597	0.647482	0.941487	280.103	211.812	0.402034	0.0980809	0.59984	211.819	213.637	-0.0118921	0.952113	0.999695	Ncam2	16	81200697	81626828	+	11330	protein_coding	neural cell adhesion molecule 2 [Source:MGI Symbol;Acc:MGI:97282]	-
ENSMUSG00000024749	11.1671	0.770315	3.88701	6.04294e-05	0.00678699	21.9407	11.4842	0.932702	0.0203076	0.302187	35.2845	11.333	1.64154	2.74145e-07	3.48582e-05	16.5458	11.4312	0.538029	0.157302	0.999695	Tmc1	19	20783458	20954202	-	4073	protein_coding	transmembrane channel-like gene family 1 [Source:MGI Symbol;Acc:MGI:2151016]	-
ENSMUSG00000008489	208.512	303.305	-0.540173	6.35371e-05	0.00709638	225.904	214.429	0.075148	0.584797	0.927943	262.949	211.598	0.311255	0.00947062	0.184057	234.745	213.449	0.137649	0.345764	0.999695	Elavl2	4	91250763	91400785	-	8313	protein_coding	ELAV like RNA binding protein 1 [Source:MGI Symbol;Acc:MGI:1100887]	-
ENSMUSG00000056486	1457.92	1856.26	-0.348536	6.47864e-05	0.00719594	1770.26	1499.59	0.239243	0.00138045	0.06274	1784.71	1479.58	0.269939	7.29632e-05	0.00450163	1515.89	1492.47	0.0225088	0.689211	0.999695	Chn1	2	73610660	73775346	-	6365	protein_coding	chimerin 1 [Source:MGI Symbol;Acc:MGI:1915674]	-
ENSMUSG00000027381	518.251	381.565	0.441265	6.62565e-05	0.0073188	469.259	533.061	-0.183842	0.0526055	0.47126	528.794	525.973	0.00772775	0.933956	0.990793	549.095	530.507	0.0496584	0.576622	0.999695	Bcl2l11	2	128126038	128162547	+	8029	protein_coding	BCL2-like 11 (apoptosis facilitator) [Source:MGI Symbol;Acc:MGI:1197519]	-
ENSMUSG00000026579	93.1385	30.6527	1.60647	6.75671e-05	0.00742279	97.3321	95.732	0.0238284	0.949929	0.99126	55.3302	94.5152	-0.77432	0.0634879	0.508041	103.314	95.325	0.116276	0.64755	0.999695	F5	1	164151838	164220277	+	7430	protein_coding	coagulation factor V [Source:MGI Symbol;Acc:MGI:88382]	-
ENSMUSG00000043463	103.636	160.834	-0.63291	7.5918e-05	0.00829487	88.2427	106.565	-0.273652	0.076418	0.549257	110.697	105.167	0.0699044	0.698602	0.948194	85.4266	106.085	-0.313524	0.0628569	0.999695	Rab9b	X	136858147	136868755	-	3980	protein_coding	RAB9B, member RAS oncogene family [Source:MGI Symbol;Acc:MGI:2442454]	-
ENSMUSG00000028059	1879.61	1435.2	0.389374	7.82971e-05	0.00845429	1690.4	1933.27	-0.193881	0.0328976	0.384843	1573.85	1907.45	-0.277359	0.000423304	0.0189541	1813.77	1924.23	-0.0855165	0.224702	0.999695	Arhgef2	3	88605966	88648052	+	9844	protein_coding	rho/rac guanine nucleotide exchange factor (GEF) 2 [Source:MGI Symbol;Acc:MGI:103264]	-
ENSMUSG00000018548	1455.92	1951.47	-0.422493	7.80529e-05	0.00845429	1614.58	1497.75	0.108476	0.133375	0.655404	1750.3	1477.65	0.243973	0.0015007	0.0506368	1519.11	1490.43	0.0276644	0.613057	0.999695	Trim37	11	87127077	87220683	+	7214	protein_coding	tripartite motif-containing 37 [Source:MGI Symbol;Acc:MGI:2153072]	-
ENSMUSG00000074657	2739.41	3740.03	-0.449286	7.86387e-05	0.00845429	2658.99	2817.24	-0.0833668	0.472943	0.891735	3198.84	2780.11	0.202502	0.00782038	0.16327	5338.73	2804.14	0.928981	1.33955e-21	4.67531e-18	Kif5a	10	127225696	127263348	-	6990	protein_coding	kinesin family member 5A [Source:MGI Symbol;Acc:MGI:109564]	-
ENSMUSG00000033214	89.3365	140.889	-0.659138	7.96278e-05	0.00851509	108.451	91.8663	0.240582	0.155866	0.684467	115.61	90.6644	0.351246	0.028301	0.346965	93.6827	91.4421	0.0361614	0.805022	0.999695	Slitrk5	14	111675097	111683141	+	5263	protein_coding	SLIT and NTRK-like family, member 5 [Source:MGI Symbol;Acc:MGI:2679448]	-
ENSMUSG00000022508	638.31	471.723	0.436908	8.14726e-05	0.00866627	715.876	656.596	0.124363	0.193625	0.725475	524.351	647.786	-0.304045	0.0618573	0.50251	634.061	653.468	-0.0439858	0.649954	0.999695	Bcl6	16	23965052	23988852	-	6700	protein_coding	B cell leukemia/lymphoma 6 [Source:MGI Symbol;Acc:MGI:107187]	ZBTB
ENSMUSG00000032908	314.943	426.81	-0.438078	8.46723e-05	0.00895922	343.594	323.967	0.0845252	0.42489	0.871093	343.424	319.632	0.101576	0.362814	0.840775	298.841	322.409	-0.109626	0.250872	0.999695	Sgpp2	1	78310345	78420289	+	4002	protein_coding	sphingosine-1-phosphate phosphotase 2 [Source:MGI Symbol;Acc:MGI:3589109]	-
ENSMUSG00000031502	774.438	561.846	0.463204	8.51317e-05	0.00896067	797.33	796.578	0.00117549	0.991601	0.998935	778.329	785.906	-0.0146361	0.878071	0.979367	704.433	792.841	-0.170914	0.0589925	0.999695	Col4a1	8	11198423	11312826	-	7464	protein_coding	collagen, type IV, alpha 1 [Source:MGI Symbol;Acc:MGI:88454]	-
ENSMUSG00000027419	421.782	576.856	-0.452356	8.62241e-05	0.00902838	470.722	433.851	0.117791	0.162082	0.691469	484.608	428.057	0.180368	0.0520998	0.466969	439.322	431.775	0.0255915	0.731558	0.999695	Pcsk2	2	143546156	143816285	+	7910	protein_coding	proprotein convertase subtilisin/kexin type 2 [Source:MGI Symbol;Acc:MGI:97512]	-
ENSMUSG00000022514	242.433	342.084	-0.495663	9.11916e-05	0.00949905	257.645	249.315	0.0468279	0.7972	0.967444	312.71	246.018	0.34472	0.0550527	0.479627	243.651	248.175	-0.0276585	0.817065	0.999695	Il1rap	16	26581704	26730117	+	11360	protein_coding	interleukin 1 receptor accessory protein [Source:MGI Symbol;Acc:MGI:104975]	-
ENSMUSG00000022763	61.8281	123.505	-0.997779	9.4308e-05	0.00977303	79.6779	63.6	0.324149	0.145673	0.67202	81.9271	62.7431	0.385725	0.0813832	0.559783	68.912	63.2971	0.121507	0.554871	0.999695	Aifm3	16	17489611	17507485	+	4688	protein_coding	apoptosis-inducing factor, mitochondrion-associated 3 [Source:MGI Symbol;Acc:MGI:1919418]	-
ENSMUSG00000027737	199.799	89.7631	1.15539	0.000104184	0.0107411	162.464	205.345	-0.338009	0.242875	0.766884	125.942	202.75	-0.687316	0.00803045	0.165204	275.819	204.485	0.432054	0.0379847	0.999695	Slc7a11	3	49892526	50443614	-	13922	protein_coding	solute carrier family 7 (cationic amino acid transporter, y+ system), member 11 [Source:MGI Symbol;Acc:MGI:1347355]	-
ENSMUSG00000049612	216.014	309.424	-0.517134	0.000105045	0.0107746	253.572	222.192	0.190438	0.16976	0.699987	274.413	219.228	0.320875	0.0138096	0.233976	215.866	221.133	-0.0351919	0.720285	0.999695	Omg	11	79500982	79504084	-	2228	protein_coding	oligodendrocyte myelin glycoprotein [Source:MGI Symbol;Acc:MGI:106586]	-
ENSMUSG00000042507	478.305	345.011	0.471957	0.000106115	0.0108291	427.738	491.917	-0.20186	0.101009	0.603339	427.093	485.412	-0.184585	0.047959	0.451239	454.304	489.624	-0.107524	0.192511	0.999695	Elmsan1	12	84149176	84218881	-	7611	protein_coding	ELM2 and Myb/SANT-like domain containing 1 [Source:MGI Symbol;Acc:MGI:2685106]	-
ENSMUSG00000001260	80.7261	129.185	-0.676585	0.000108463	0.0110129	90.1191	83.0378	0.116544	0.550449	0.917654	135.55	81.928	0.724897	1.05297e-06	0.000117902	86.895	82.6409	0.0714316	0.642855	0.999695	Gabrg1	5	70751047	70842617	-	7869	protein_coding	gamma-aminobutyric acid (GABA) A receptor, subunit gamma 1 [Source:MGI Symbol;Acc:MGI:103156]	-
ENSMUSG00000040724	1090.26	1614.08	-0.565954	0.000111603	0.0112747	1213.35	1121.03	0.114081	0.458048	0.88586	1546.24	1106.45	0.482665	0.000543476	0.0229483	1117.45	1115.94	0.00200513	0.98444	0.999695	Kcna2	3	107101146	107115005	+	11906	protein_coding	potassium voltage-gated channel, shaker-related subfamily, member 2 [Source:MGI Symbol;Acc:MGI:96659]	-
ENSMUSG00000003545	141.639	81.2882	0.803513	0.000114112	0.0114705	142.675	145.71	-0.0321693	0.858222	0.977194	80.7261	143.729	-0.829464	0.00629471	0.141811	130.368	145.022	-0.154944	0.411483	0.999695	Fosb	7	19302696	19310051	-	6243	protein_coding	FBJ osteosarcoma oncogene B [Source:MGI Symbol;Acc:MGI:95575]	TF_bZIP
ENSMUSG00000057455	1242.93	1523.56	-0.293634	0.000118851	0.0118874	1478.69	1278.62	0.209629	0.0051224	0.14025	1444.94	1261.44	0.195597	0.00559783	0.133036	1346.44	1272.42	0.0814933	0.134499	0.999695	Rit2	18	30973489	31317290	-	4496	protein_coding	Ras-like without CAAX 2 [Source:MGI Symbol;Acc:MGI:108054]	-
ENSMUSG00000059866	838.573	577.927	0.537497	0.000134998	0.0134253	778.189	862.272	-0.14852	0.264743	0.789797	674.912	850.962	-0.333866	0.00378632	0.100135	846.219	858.396	-0.0208252	0.828843	0.999695	Tnip2	5	34496087	34513991	-	2685	protein_coding	TNFAIP3 interacting protein 2 [Source:MGI Symbol;Acc:MGI:2386643]	-
ENSMUSG00000046999	5.31683	19.0459	-1.84713	0.000135562	0.0134253	10.8745	5.46648	1.001	0.077637	0.552642	9.92875	5.39504	0.892347	0.198035	0.731612	6.50521	5.44284	0.26354	0.673912	1	1110032F04Rik	3	68869586	68872163	+	2578	protein_coding	RIKEN cDNA 1110032F04 gene [Source:MGI Symbol;Acc:MGI:1915975]	-
ENSMUSG00000029718	454.261	260.336	0.803888	0.000138318	0.0136311	628.916	467.387	0.428205	0.190218	0.723445	260.567	460.974	-0.822068	0.00123192	0.0441489	460.097	465.119	-0.0163037	0.932109	0.999695	Pcolce	5	137605103	137613784	-	3823	protein_coding	procollagen C-endopeptidase enhancer protein [Source:MGI Symbol;Acc:MGI:105099]	-
ENSMUSG00000029304	304.7	210.827	0.529994	0.000145641	0.0142828	240.72	313.451	-0.380905	0.0448691	0.444173	355.596	309.251	0.201237	0.0529743	0.471054	294.15	311.921	-0.084934	0.44101	0.999695	Spp1	5	104435118	104441050	+	1648	protein_coding	secreted phosphoprotein 1 [Source:MGI Symbol;Acc:MGI:98389]	-
ENSMUSG00000051177	202.574	327.175	-0.691637	0.000149403	0.0145805	188.922	208.269	-0.14077	0.366737	0.848973	255.997	205.582	0.315717	0.073556	0.542677	191.076	207.334	-0.117726	0.42745	0.999695	Plcb1	2	134786067	135475258	+	11115	protein_coding	phospholipase C, beta 1 [Source:MGI Symbol;Acc:MGI:97613]	-
ENSMUSG00000001473	144.302	84.9875	0.765284	0.000171107	0.0166014	117.98	148.474	-0.33242	0.0535187	0.473648	95.4223	146.446	-0.617808	0.00285858	0.0828273	130.197	147.743	-0.182382	0.287128	0.999695	Tubb6	18	67390717	67402748	+	1757	protein_coding	tubulin, beta 6 class V [Source:MGI Symbol;Acc:MGI:1915201]	-
ENSMUSG00000034488	1314.56	1859.65	-0.500315	0.000171761	0.0166014	1406.33	1352.18	0.0566109	0.544293	0.916728	1512.62	1334.14	0.180455	0.0253771	0.326776	1309.17	1345.7	-0.0397025	0.443369	0.999695	Edil3	13	88821472	89323223	+	13677	protein_coding	EGF-like repeats and discoidin I-like domains 3 [Source:MGI Symbol;Acc:MGI:1329025]	-
ENSMUSG00000026765	36.0221	64.8964	-0.848563	0.000178059	0.0171277	49.3249	37.0497	0.412047	0.0563162	0.483209	40.6175	36.5542	0.148804	0.536029	0.903592	41.9137	36.8784	0.183437	0.445837	0.999695	Lypd6b	2	49787688	49948849	+	2604	protein_coding	LY6/PLAUR domain containing 6B [Source:MGI Symbol;Acc:MGI:1919147]	-
ENSMUSG00000028546	266.396	385.396	-0.53201	0.000181607	0.0173858	339.757	273.965	0.31047	0.0100228	0.207267	366.932	270.353	0.438865	0.000130829	0.0072702	285.395	272.697	0.0655907	0.52463	0.999695	Elavl4	4	110203722	110351909	-	5387	protein_coding	ELAV like RNA binding protein 4 [Source:MGI Symbol;Acc:MGI:107427]	-
ENSMUSG00000006342	90.7042	153.357	-0.757419	0.000183265	0.0174615	118.685	93.3103	0.347153	0.0731518	0.539269	133.838	92.06	0.539839	0.005744	0.134942	100.381	92.856	0.113098	0.563055	0.999695	Susd2	10	75636706	75644008	-	3435	protein_coding	sushi domain containing 2 [Source:MGI Symbol;Acc:MGI:1918983]	-
ENSMUSG00000026023	37.3981	15.6136	1.25233	0.000186089	0.0176469	22.7834	38.4708	-0.75072	0.0132775	0.246135	24.408	37.9578	-0.629738	0.0239222	0.316293	35.0277	38.2828	-0.124629	0.65044	0.999695	Cdk15	1	59256906	59352993	+	2507	protein_coding	cyclin-dependent kinase 15 [Source:MGI Symbol;Acc:MGI:3583944]	-
ENSMUSG00000049100	669.593	968.85	-0.532993	0.000196544	0.0185508	758.392	688.608	0.139187	0.321998	0.827913	909.531	679.539	0.420115	0.000751854	0.0302165	688.986	685.418	0.00791838	0.938028	0.999695	Pcdh10	3	45378398	45435623	+	15888	protein_coding	protocadherin 10 [Source:MGI Symbol;Acc:MGI:1338042]	-
ENSMUSG00000025408	733.598	524.168	0.485023	0.000203717	0.019138	719.827	754.808	-0.0684508	0.632477	0.940484	548.293	744.5	-0.440854	0.00013357	0.00734996	608.049	751.089	-0.30501	0.00237202	0.517548	Ddit3	10	127290774	127296288	+	1713	protein_coding	DNA-damage inducible transcript 3 [Source:MGI Symbol;Acc:MGI:109247]	TF_bZIP
ENSMUSG00000031538	285.197	177.99	0.681222	0.000208491	0.0194953	283.644	293.401	-0.0481824	0.715878	0.955	349.274	289.445	0.271644	0.0199086	0.287572	262.679	291.967	-0.152585	0.149279	0.999695	Plat	8	22757727	22782844	+	6241	protein_coding	plasminogen activator, tissue [Source:MGI Symbol;Acc:MGI:97610]	-
ENSMUSG00000022321	52.0025	88.2354	-0.761796	0.000211545	0.0195986	62.7139	53.466	0.228731	0.220162	0.75121	66.9743	52.7703	0.339822	0.108442	0.618961	69.284	53.2295	0.378292	0.0424507	0.999695	Cdh10	15	18818947	19014236	+	10051	protein_coding	cadherin 10 [Source:MGI Symbol;Acc:MGI:107436]	-
ENSMUSG00000015312	351.221	172.009	1.03059	0.000210937	0.0195986	418.298	361.56	0.209974	0.274315	0.796284	232.894	356.466	-0.613493	0.140196	0.669466	333.82	359.651	-0.108193	0.574772	0.999695	Gadd45b	10	80930073	80932204	+	1589	protein_coding	growth arrest and DNA-damage-inducible 45 beta [Source:MGI Symbol;Acc:MGI:107776]	-
ENSMUSG00000052516	901.469	1267.47	-0.491593	0.000215738	0.0198954	870.552	927.059	-0.0908891	0.496234	0.90117	1084.48	914.883	0.245168	0.0147155	0.242806	914.375	922.739	-0.0127874	0.879981	0.999695	Robo2	16	73891839	74411825	-	16983	protein_coding	roundabout guidance receptor 2 [Source:MGI Symbol;Acc:MGI:1890110]	-
ENSMUSG00000022272	1911.78	1309.15	0.546583	0.000217135	0.0199256	1548.5	1966.71	-0.345074	0.00537066	0.144527	1188.43	1940.13	-0.707485	1.43615e-13	5.29868e-11	1712.04	1957.28	-0.193365	0.0780443	0.999695	Myo10	15	25622525	25813673	+	10122	protein_coding	myosin X [Source:MGI Symbol;Acc:MGI:107716]	-
ENSMUSG00000026202	708.535	983.105	-0.472631	0.000218048	0.0199256	816.58	728.89	0.163772	0.146835	0.672409	915.639	719.09	0.349154	0.00219512	0.0687111	726.987	725.342	0.00310761	0.972748	0.999695	Tuba4a	1	75214228	75219865	-	3701	protein_coding	tubulin, alpha 4A [Source:MGI Symbol;Acc:MGI:1095410]	-
ENSMUSG00000057614	373.806	540.558	-0.531815	0.000223223	0.0203062	409.982	384.555	0.0924999	0.298969	0.813211	401.461	379.373	0.0796604	0.417448	0.860794	411.659	382.681	0.105552	0.144488	0.999695	Gnai1	5	18265135	18360355	-	3135	protein_coding	guanine nucleotide binding protein (G protein), alpha inhibiting 1 [Source:MGI Symbol;Acc:MGI:95771]	-
ENSMUSG00000003379	28.711	9.33041	1.62393	0.000227903	0.0206385	31.5382	29.5611	0.0971873	0.811483	0.968508	9.62737	29.147	-1.59072	0.000193664	0.00992846	27.9603	29.3966	-0.0702241	0.826227	0.999695	Cd79a	7	24897381	24902197	+	1457	protein_coding	CD79A antigen (immunoglobulin-associated alpha) [Source:MGI Symbol;Acc:MGI:101774]	-
ENSMUSG00000058441	371.105	590.666	-0.670817	0.000229051	0.0206495	412.673	381.84	0.111919	0.300345	0.814028	485.328	376.637	0.366004	7.75836e-05	0.00470646	390.162	379.94	0.0388434	0.703993	0.999695	Panx2	15	89059734	89073567	+	3599	protein_coding	pannexin 2 [Source:MGI Symbol;Acc:MGI:1890615]	-
ENSMUSG00000048065	21.9736	5.86784	1.88887	0.00024348	0.0216589	3.59069	22.5964	-2.67222	3.55438e-08	2.13806e-05	1.92774	22.2966	-3.4968	4.38112e-08	6.55367e-06	14.4582	22.4965	-0.641067	0.040628	0.999695	Cyb5r2	7	107748455	107758032	-	2772	protein_coding	cytochrome b5 reductase 2 [Source:MGI Symbol;Acc:MGI:2444415]	-
ENSMUSG00000029608	1925.81	2665.19	-0.46891	0.000242604	0.0216589	2076.93	1980.66	0.0684375	0.319702	0.82641	2323.44	1954.38	0.249405	0.000411356	0.0185159	1973.83	1971.42	0.00181656	0.978951	0.999695	Rph3a	5	120940499	121010092	-	4639	protein_coding	rabphilin 3A [Source:MGI Symbol;Acc:MGI:102788]	-
ENSMUSG00000020695	65.1412	34.4424	0.919096	0.000242451	0.0216589	68.7259	66.9923	0.0369116	0.89738	0.980959	35.4458	66.1033	-0.903926	0.00544307	0.130183	61.2229	66.6876	-0.124407	0.529755	0.999695	Mrc2	11	105292643	105351139	+	6674	protein_coding	mannose receptor, C type 2 [Source:MGI Symbol;Acc:MGI:107818]	-
ENSMUSG00000024524	364.55	524.149	-0.524027	0.00025078	0.0222101	439.019	374.932	0.228058	0.0536197	0.474116	487.874	369.972	0.399419	0.000772573	0.0309031	355.141	373.172	-0.0706807	0.501	0.999695	Gnal	18	67088336	67226792	+	5761	protein_coding	guanine nucleotide binding protein, alpha stimulating, olfactory type [Source:MGI Symbol;Acc:MGI:95774]	-
ENSMUSG00000030717	273.767	143.073	0.935945	0.000252581	0.0222714	281.379	281.815	-0.00264676	0.990388	0.998935	129.448	277.85	-1.10088	0.0236816	0.315185	285.841	280.343	0.0276734	0.887177	0.999695	Nupr1	7	126623249	126630861	-	2514	protein_coding	nuclear protein transcription regulator 1 [Source:MGI Symbol;Acc:MGI:1891834]	-
ENSMUSG00000096914	139.026	210.269	-0.598067	0.000258891	0.0227282	159.845	142.968	0.161362	0.370762	0.850445	177.436	141.093	0.328687	0.042543	0.423914	153.717	142.309	0.111392	0.460394	0.999695	Galntl6	8	57774052	58912640	-	7414	protein_coding	UDP-N-acetyl-alpha-D-galactosamine:polypeptide N-acetylgalactosaminyltransferase-like 6 [Source:MGI Symbol;Acc:MGI:1913581]	-
ENSMUSG00000017167	1222.5	1568.31	-0.359302	0.000260499	0.0227699	1299.03	1257.22	0.0469768	0.640178	0.940707	1590.75	1240.65	0.35837	4.12409e-06	0.000391631	1293.24	1251.39	0.047345	0.522486	0.999695	Cntnap1	11	101170523	101190724	+	5875	protein_coding	contactin associated protein-like 1 [Source:MGI Symbol;Acc:MGI:1858201]	-
ENSMUSG00000024912	162.269	95.777	0.760442	0.000267552	0.0232851	110.863	166.903	-0.592138	0.000236448	0.0207847	85.4717	164.672	-0.94608	1.36163e-09	2.78589e-07	139.166	166.118	-0.254952	0.095895	0.999695	Fosl1	19	5447703	5455945	+	1707	protein_coding	fos-like antigen 1 [Source:MGI Symbol;Acc:MGI:107179]	TF_bZIP
ENSMUSG00000037408	1788	1379.27	0.374847	0.000272219	0.0234625	1656	1839.31	-0.151699	0.0598008	0.495741	1472.08	1814.59	-0.301332	0.00136037	0.047175	1713.66	1830.44	-0.0953516	0.182492	0.999695	Cnnm4	1	36471620	36508764	+	4829	protein_coding	cyclin M4 [Source:MGI Symbol;Acc:MGI:2151060]	-
ENSMUSG00000035673	1043.85	822.655	0.344082	0.000273091	0.0234625	1151.82	1073.83	0.100874	0.335374	0.831314	960.366	1059.38	-0.141164	0.229529	0.760927	1092.47	1068.64	0.0316193	0.786494	0.999695	Sbno2	10	80056992	80105571	-	10715	protein_coding	strawberry notch 2 [Source:MGI Symbol;Acc:MGI:2448490]	-
ENSMUSG00000087022	3.12233	13.0644	-2.06236	0.000270868	0.0234625	3.94415	3.21055	0.292767	0.684426	1	2.7209	3.16863	-0.216369	0.791807	0.964673	2.2054	3.19572	-0.54513	0.511748	1	9130024F11Rik	1	56971412	57050084	+	5779	processed_transcript	RIKEN cDNA 9130024F11 gene [Source:MGI Symbol;Acc:MGI:1926150]	-
ENSMUSG00000001552	615.819	485.196	0.3442	0.000276053	0.023616	506.909	633.554	-0.321409	0.00499764	0.137752	697.239	624.991	0.157383	0.0528407	0.470424	612.837	630.452	-0.0404209	0.722391	0.999695	Jup	11	100368958	100397763	-	6436	protein_coding	junction plakoglobin [Source:MGI Symbol;Acc:MGI:96650]	-
ENSMUSG00000037224	2654.3	2033.28	0.384639	0.000283127	0.0241186	2426.45	2730.31	-0.17035	0.052653	0.471315	2833.06	2693.66	0.0730832	0.509071	0.896602	2687.48	2717.34	-0.0161092	0.844116	0.999695	Zfyve28	5	34194893	34288449	-	5756	protein_coding	zinc finger, FYVE domain containing 28 [Source:MGI Symbol;Acc:MGI:2684992]	-
ENSMUSG00000038587	919.658	688.299	0.418283	0.000284445	0.0241286	884.176	945.795	-0.0975042	0.422441	0.87065	862.055	933.269	-0.11373	0.356558	0.83916	899.764	941.439	-0.0652536	0.470385	0.999695	Akap12	10	4266380	4359470	+	6461	protein_coding	A kinase (PRKA) anchor protein (gravin) 12 [Source:MGI Symbol;Acc:MGI:1932576]	-
ENSMUSG00000035653	173.55	258.537	-0.574613	0.000289657	0.0244675	212.597	178.435	0.25204	0.113964	0.627462	249.479	176.119	0.501185	0.000759066	0.0304519	204.28	177.644	0.20114	0.125435	0.999695	Lrfn5	12	61523150	61858342	+	9540	protein_coding	leucine rich repeat and fibronectin type III domain containing 5 [Source:MGI Symbol;Acc:MGI:2144814]	-
ENSMUSG00000036111	584.628	412.553	0.502556	0.000297672	0.0250394	576.255	601.605	-0.0621893	0.609451	0.935153	406.978	593.339	-0.542828	0.00146978	0.0500438	585.562	598.575	-0.0318866	0.778367	0.999695	Lmo1	7	109138572	109175207	-	1552	protein_coding	LIM domain only 1 [Source:MGI Symbol;Acc:MGI:102812]	-
ENSMUSG00000052631	32.678	11.6602	1.48037	0.000300843	0.0252007	18.9521	33.6203	-0.822731	0.0029605	0.0999144	12.1732	33.1641	-1.44429	2.75573e-05	0.00198784	15.9782	33.4547	-1.0631	0.000718285	0.261142	Sh2d6	6	72513644	72521634	-	1737	protein_coding	SH2 domain containing 6 [Source:MGI Symbol;Acc:MGI:1918380]	-
ENSMUSG00000029860	603.552	410.313	0.556202	0.000305315	0.0254691	646.299	620.926	0.0576689	0.62621	0.938432	557.555	612.553	-0.134884	0.347927	0.833037	611.395	617.884	-0.0151752	0.879972	0.999695	Zyx	6	42349630	42360213	+	5390	protein_coding	zyxin [Source:MGI Symbol;Acc:MGI:103072]	-
ENSMUSG00000041548	138.611	84.6075	0.709468	0.000324339	0.0268753	120.159	142.574	-0.245782	0.185848	0.720434	116.616	140.67	-0.26723	0.188774	0.72201	137.008	141.9	-0.0499086	0.74899	0.999695	Hspb8	5	116408491	116422864	-	1950	protein_coding	heat shock protein 8 [Source:MGI Symbol;Acc:MGI:2135756]	-
ENSMUSG00000024497	36.7892	70.0709	-0.930211	0.000324846	0.0268753	23.2949	37.8432	-0.700096	0.0375463	0.409152	35.1797	37.3348	-0.0887918	0.759308	0.961049	37.3673	37.6635	-0.0130333	0.951988	0.999695	Pou4f3	18	42394539	42397249	+	2360	protein_coding	POU domain, class 4, transcription factor 3 [Source:MGI Symbol;Acc:MGI:102523]	Pou
ENSMUSG00000022324	81.785	41.5076	0.981	0.000337505	0.0278082	107.939	84.0926	0.360089	0.266292	0.790063	58.9859	83.0031	-0.493346	0.158363	0.687478	111.867	83.7088	0.41816	0.100492	0.999695	Matn2	15	34306677	34436273	+	6263	protein_coding	matrilin 2 [Source:MGI Symbol;Acc:MGI:109613]	-
ENSMUSG00000030123	388.643	287.051	0.438198	0.00035201	0.0288849	383.416	399.694	-0.0599229	0.513697	0.907597	278.78	394.419	-0.500034	6.88859e-07	7.99147e-05	403.952	397.832	0.0214519	0.818422	0.999695	Plxnd1	6	115954811	115995005	-	7301	protein_coding	plexin D1 [Source:MGI Symbol;Acc:MGI:2154244]	-
ENSMUSG00000068373	122.835	180.554	-0.555547	0.000356141	0.0291051	157.664	126.33	0.318851	0.0389144	0.416842	182.426	124.657	0.54829	6.57064e-05	0.0041539	113.23	125.74	-0.151405	0.295567	0.999695	D430041D05Rik	2	104143073	104411013	-	16639	protein_coding	RIKEN cDNA D430041D05 gene [Source:MGI Symbol;Acc:MGI:2181743]	-
ENSMUSG00000027858	47.622	95.1077	-0.995285	0.000366694	0.0298027	64.4756	48.948	0.394482	0.0993945	0.60016	77.6784	48.322	0.682417	0.00787486	0.163952	46.4257	48.745	-0.073518	0.762845	0.999695	Tspan2	3	102734529	102801513	+	4755	protein_coding	tetraspanin 2 [Source:MGI Symbol;Acc:MGI:1917997]	-
ENSMUSG00000049946	39.9745	68.4487	-0.775879	0.000367642	0.0298027	41.9658	41.1248	0.0261247	0.910779	0.98381	43.3035	40.5673	0.0926919	0.696474	0.947703	38.8262	40.9255	-0.0777712	0.706167	0.999695	BC030500	8	58911755	58914298	+	1769	protein_coding	cDNA sequence BC030500 [Source:MGI Symbol;Acc:MGI:2447770]	-
ENSMUSG00000110289	111.449	50.5612	1.13818	0.000372266	0.0299482	71.2752	114.689	-0.685879	0.0266409	0.346383	58.2155	113.095	-0.954844	0.000419735	0.0188554	104.699	114.124	-0.125501	0.523826	0.999695	4930412F12Rik	8	57650889	57652359	-	1471	TEC	RIKEN cDNA 4930412F12 gene [Source:MGI Symbol;Acc:MGI:1922099]	-
ENSMUSG00000056071	14.9952	1.74683	3.09923	0.000372416	0.0299482	4.50284	15.4695	-1.77918	0.00552909	0.1461	3.67034	15.2244	-2.07509	0.0217913	0.299944	8.95426	15.3648	-0.780883	0.240224	0.999695	S100a9	3	90692632	90695721	-	522	protein_coding	S100 calcium binding protein A9 (calgranulin B) [Source:MGI Symbol;Acc:MGI:1338947]	-
ENSMUSG00000061524	90.0035	47.2499	0.929562	0.000394738	0.0316167	101.747	92.6216	0.135194	0.533528	0.915067	69.4927	91.3457	-0.391488	0.0735906	0.542677	96.1249	92.1537	0.0600018	0.719758	0.999695	Zic2	14	122475435	122479852	+	2880	protein_coding	zinc finger protein of the cerebellum 2 [Source:MGI Symbol;Acc:MGI:106679]	zf-C2H2
ENSMUSG00000027560	195.944	130.823	0.581778	0.000418125	0.0329646	152.898	201.568	-0.398697	0.00365072	0.113209	140.85	198.847	-0.495873	0.00189025	0.0606877	175.481	200.604	-0.193002	0.160112	0.999695	Dok5	2	170731807	170879769	+	1768	protein_coding	docking protein 5 [Source:MGI Symbol;Acc:MGI:1924079]	-
ENSMUSG00000045294	866.682	1237.93	-0.514492	0.000417014	0.0329646	795.575	891.296	-0.164416	0.10793	0.617522	1027.64	879.495	0.224734	0.0347354	0.387391	910.929	887.219	0.0380605	0.729105	0.999695	Insig1	5	28071363	28078662	+	3093	protein_coding	insulin induced gene 1 [Source:MGI Symbol;Acc:MGI:1916289]	-
ENSMUSG00000075033	103.167	147.507	-0.515115	0.000413445	0.0329646	117.332	106.118	0.145121	0.310874	0.821215	121.706	104.7	0.218019	0.130723	0.656758	118.16	105.615	0.163107	0.216336	0.999695	Nxpe3	16	55839953	55895285	-	6436	protein_coding	neurexophilin and PC-esterase domain family, member 3 [Source:MGI Symbol;Acc:MGI:2686598]	-
ENSMUSG00000042759	20.9519	7.26603	1.52724	0.000417243	0.0329646	19.8223	21.5549	-0.119291	0.683261	0.948521	13.0852	21.2634	-0.688503	0.15697	0.686386	16.0111	21.4511	-0.42051	0.306437	0.999695	Apobr	7	126584942	126589112	+	3779	protein_coding	apolipoprotein B receptor [Source:MGI Symbol;Acc:MGI:2176230]	-
ENSMUSG00000033039	482.66	311.525	0.631384	0.000424088	0.0333042	367.396	496.288	-0.433873	6.98548e-05	0.00885297	486.066	489.821	-0.0111585	0.930009	0.990447	444.198	494.036	-0.153319	0.229412	0.999695	Micall1	15	79108898	79136900	+	8341	protein_coding	microtubule associated monooxygenase, calponin and LIM domain containing -like 1 [Source:MGI Symbol;Acc:MGI:105870]	-
ENSMUSG00000034248	2042.62	1354.19	0.593264	0.000427739	0.0334602	1950.38	2100.89	-0.107475	0.476549	0.893488	1329.19	2072.81	-0.640842	8.39407e-06	0.000712894	1825.15	2091.14	-0.196514	0.0941672	0.999695	Slc25a37	14	69241848	69285112	-	6021	protein_coding	solute carrier family 25, member 37 [Source:MGI Symbol;Acc:MGI:1914962]	-
ENSMUSG00000037509	453.033	586.601	-0.372311	0.000439189	0.0342227	537.298	466.07	0.204365	0.0297873	0.366773	518.84	459.759	0.174574	0.0659825	0.517783	469.379	463.821	0.0166631	0.858706	0.999695	Arhgef4	1	34678188	34813309	+	9861	protein_coding	Rho guanine nucleotide exchange factor (GEF) 4 [Source:MGI Symbol;Acc:MGI:2442507]	-
ENSMUSG00000050064	75.3556	45.1225	0.740819	0.000450254	0.0349494	54.6504	77.5305	-0.507691	0.00879438	0.194446	39.3703	76.4768	-0.969684	7.50579e-05	0.00460287	67.445	77.15	-0.193807	0.257977	0.999695	Zfp697	3	98382461	98753812	+	8276	protein_coding	zinc finger protein 697 [Source:MGI Symbol;Acc:MGI:2139736]	zf-C2H2
ENSMUSG00000004562	484.013	337.301	0.520982	0.000452999	0.0350273	422.543	497.772	-0.236433	0.0642065	0.512949	434.963	491.176	-0.174954	0.132355	0.658443	445.158	495.471	-0.154441	0.151582	0.999695	Arhgef40	14	51984719	52006251	+	10366	protein_coding	Rho guanine nucleotide exchange factor (GEF) 40 [Source:MGI Symbol;Acc:MGI:2685515]	-
ENSMUSG00000046854	86.6566	43.8954	0.978234	0.000467797	0.0360329	87.195	89.1459	-0.0310021	0.882714	0.979705	122.793	87.9376	0.481938	0.00496064	0.121942	83.7395	88.7238	-0.0838334	0.607509	0.999695	Pip5kl1	2	32574797	32583782	+	2494	protein_coding	phosphatidylinositol-4-phosphate 5-kinase-like 1 [Source:MGI Symbol;Acc:MGI:2448520]	-
ENSMUSG00000030246	1782.05	2208.11	-0.3093	0.000473255	0.0363142	2267.13	1833.58	0.30628	0.00395513	0.119254	2083.35	1808.62	0.204094	0.00912931	0.180844	1871.97	1824.45	0.0371742	0.609467	0.999695	Ldhb	6	142490249	142507957	-	1570	protein_coding	lactate dehydrogenase B [Source:MGI Symbol;Acc:MGI:96763]	-
ENSMUSG00000017412	440.824	630.87	-0.516636	0.000475755	0.0363672	461.426	453.328	0.0249968	0.828837	0.972454	564.834	447.358	0.334957	0.00265447	0.0789927	446.969	451.247	-0.0140682	0.88748	0.999695	Cacnb4	2	52428320	52676831	-	8963	protein_coding	calcium channel, voltage-dependent, beta 4 subunit [Source:MGI Symbol;Acc:MGI:103301]	-
ENSMUSG00000026834	20.1908	5.51881	1.87429	0.000478994	0.0364761	19.5242	20.7594	-0.0927261	0.820961	0.971116	23.7388	20.4876	0.212003	0.589191	0.921176	19.9229	20.6679	-0.0546241	0.863241	0.999695	Acvr1c	2	58267453	58357895	-	9292	protein_coding	activin A receptor, type IC [Source:MGI Symbol;Acc:MGI:2661081]	-
ENSMUSG00000032839	2345.1	2945.13	-0.328513	0.000507935	0.038534	2351.67	2412.04	-0.0366806	0.724318	0.955714	2480.45	2379.94	0.0592939	0.415223	0.859864	2527.54	2400.65	0.0741191	0.121767	0.999695	Trpc1	9	95705082	95750375	-	8030	protein_coding	transient receptor potential cation channel, subfamily C, member 1 [Source:MGI Symbol;Acc:MGI:109528]	-
ENSMUSG00000074971	13.9524	3.24595	2.1045	0.000512422	0.0385832	3.16325	14.361	-2.19255	8.7801e-05	0.0103201	2.31025	14.1589	-2.64857	0.000133159	0.00734531	3.94735	14.2889	-1.85659	0.000607982	1	Fibin	2	110360917	110363183	-	2267	protein_coding	fin bud initiation factor homolog (zebrafish) [Source:MGI Symbol;Acc:MGI:1914856]	-
ENSMUSG00000020436	1274.31	1637.76	-0.361939	0.000510675	0.0385832	1482.09	1310.79	0.177207	0.0412334	0.427857	1515.23	1293.29	0.227808	0.00578012	0.135367	1347.23	1304.5	0.0465922	0.402598	0.999695	Gabrg2	11	41910203	42000857	-	5916	protein_coding	gamma-aminobutyric acid (GABA) A receptor, subunit gamma 2 [Source:MGI Symbol;Acc:MGI:95623]	-
ENSMUSG00000058498	6474.45	4594.57	0.494767	0.00051514	0.0386432	5839.73	6660.51	-0.189709	0.0104944	0.21399	5380.01	6571.19	-0.28834	0.00599783	0.137991	6006.28	6627.84	-0.142005	0.0292199	0.999695	Rnf207	4	152307019	152318993	-	6331	protein_coding	ring finger protein 207 [Source:MGI Symbol;Acc:MGI:2684989]	-
ENSMUSG00000031026	490.495	310.576	0.659138	0.000523145	0.038953	246.386	504.289	-1.03337	5.62803e-11	7.19402e-08	293.371	497.783	-0.762916	1.57879e-06	0.000168399	397.258	502.03	-0.337167	0.0136946	0.999695	Trim66	7	109449006	109508134	-	10125	protein_coding	tripartite motif-containing 66 [Source:MGI Symbol;Acc:MGI:2152406]	-
ENSMUSG00000037653	260.414	334.914	-0.362285	0.000521281	0.038953	317.257	267.852	0.244437	0.0132098	0.245351	298.422	264.284	0.173321	0.0797946	0.556338	288.413	266.585	0.114103	0.231083	0.999695	Kctd8	5	69109285	69341679	-	3373	protein_coding	potassium channel tetramerisation domain containing 8 [Source:MGI Symbol;Acc:MGI:2443804]	-
ENSMUSG00000036745	1062.37	1449.89	-0.448623	0.00055565	0.0412206	1093.95	1092.67	0.00180488	0.987369	0.998603	1296.97	1078.18	0.266053	0.00828945	0.169294	1018.31	1087.5	-0.0946393	0.195354	0.999695	Ttll7	3	146852367	146984009	+	8266	protein_coding	tubulin tyrosine ligase-like family, member 7 [Source:MGI Symbol;Acc:MGI:1918142]	-
ENSMUSG00000021835	41.2772	14.7749	1.48274	0.000567776	0.0419653	25.4301	42.417	-0.737927	0.0911733	0.584355	19.1325	41.8837	-1.12539	0.00598186	0.137898	39.0327	42.2417	-0.11377	0.688112	0.999695	Bmp4	14	46383520	46390669	-	2248	protein_coding	bone morphogenetic protein 4 [Source:MGI Symbol;Acc:MGI:88180]	-
ENSMUSG00000058258	224.798	320.857	-0.51388	0.000576454	0.0424507	217.628	231.198	-0.087635	0.639156	0.940707	295.344	228.151	0.3718	0.0104629	0.195418	251.838	230.097	0.131322	0.316509	0.999695	Idi1	13	8885501	8892451	+	3505	protein_coding	isopentenyl-diphosphate delta isomerase [Source:MGI Symbol;Acc:MGI:2442264]	-
ENSMUSG00000043384	4815.87	5595.29	-0.216362	0.000584858	0.0429123	5422.55	4953.46	0.130505	0.0391261	0.417406	5598.81	4887.45	0.195884	0.00089128	0.0342391	5213.09	4929.98	0.0805597	0.117422	0.999695	Gprasp1	X	135742733	135803474	+	8119	protein_coding	G protein-coupled receptor associated sorting protein 1 [Source:MGI Symbol;Acc:MGI:1917418]	-
ENSMUSG00000028488	3044.77	3785.25	-0.313965	0.000603712	0.0441346	3059.43	3131.74	-0.0337564	0.773682	0.963072	3404.78	3090.05	0.139558	0.080937	0.559439	3088.61	3116.86	-0.0131418	0.776778	0.999695	Sh3gl2	4	85205126	85639195	+	6551	protein_coding	SH3-domain GRB2-like 2 [Source:MGI Symbol;Acc:MGI:700009]	-
ENSMUSG00000030110	921.34	759.03	0.279687	0.000620738	0.0452149	844.923	947.599	-0.165659	0.0597246	0.495533	975.688	935.026	0.061504	0.431793	0.868702	861.539	943.148	-0.130449	0.054363	0.999695	Ret	6	118151745	118197718	-	6763	protein_coding	ret proto-oncogene [Source:MGI Symbol;Acc:MGI:97902]	-
ENSMUSG00000029708	516.886	403.152	0.358585	0.000628764	0.0456342	442.526	531.67	-0.265483	0.0206164	0.303999	412.113	524.565	-0.347172	0.00223424	0.0695488	510.006	529.143	-0.0536519	0.549269	0.999695	Gcc1	6	28416091	28428390	-	5287	protein_coding	golgi coiled coil 1 [Source:MGI Symbol;Acc:MGI:1921625]	-
ENSMUSG00000084989	15.4275	3.50087	2.13847	0.000632203	0.0457188	14.4092	15.8531	-0.136127	0.820082	0.970899	8.33521	15.657	-0.918486	0.07775	0.551131	16.7437	15.7865	0.0865725	0.839323	0.999695	Crocc2	1	93168725	93231072	+	7132	protein_coding	ciliary rootlet coiled-coil, rootletin family member 2 [Source:MGI Symbol;Acc:MGI:3045962]	-
ENSMUSG00000028883	90.0882	132.825	-0.561132	0.000650779	0.0468934	84.5065	92.6568	-0.130548	0.480257	0.893985	104.569	91.4348	0.195314	0.296602	0.807898	82.2152	92.2135	-0.163314	0.295439	0.999695	Sema3a	5	13125414	13602565	+	13868	protein_coding	sema domain, immunoglobulin domain (Ig), short basic domain, secreted, (semaphorin) 3A [Source:MGI Symbol;Acc:MGI:107558]	-
ENSMUSG00000031273	131.247	80.4639	0.708912	0.000664195	0.0476892	123.354	134.954	-0.130451	0.483652	0.895874	82.0544	133.189	-0.70416	5.47989e-05	0.00354398	116.704	134.35	-0.204656	0.122856	0.999695	Col4a6	X	141165403	141474076	-	7973	protein_coding	collagen, type IV, alpha 6 [Source:MGI Symbol;Acc:MGI:2152695]	-
ENSMUSG00000024883	66.8388	34.217	0.964506	0.000671863	0.0480681	40.4555	68.7284	-0.765025	0.00014039	0.0146492	25.3627	67.8274	-1.41164	2.87668e-08	4.49602e-06	42.8537	68.4191	-0.676158	0.00145774	0.397484	Rin1	19	5050481	5057071	+	4792	protein_coding	Ras and Rab interactor 1 [Source:MGI Symbol;Acc:MGI:2385695]	-
ENSMUSG00000044646	72.697	42.6481	0.77028	0.000686482	0.0489399	83.8331	74.8214	0.164322	0.39054	0.861074	59.1134	73.7862	-0.31436	0.203166	0.737017	71.725	74.4339	-0.0536185	0.811005	0.999695	Zbtb7c	18	75820178	76148561	+	4729	protein_coding	zinc finger and BTB domain containing 7C [Source:MGI Symbol;Acc:MGI:2443302]	ZBTB
ENSMUSG00000033615	828.449	1262.77	-0.608323	0.000713672	0.0504071	874.878	852.448	0.0375854	0.77779	0.963455	1124.89	840.803	0.420262	1.09133e-05	0.000893142	841.709	848.18	-0.0108804	0.899977	0.999695	Cplx1	5	108518554	108550024	-	2189	protein_coding	complexin 1 [Source:MGI Symbol;Acc:MGI:104727]	-
ENSMUSG00000066129	156.165	243.754	-0.643201	0.000711474	0.0504071	203.823	160.567	0.3448	0.0106413	0.215909	230.649	158.482	0.54331	0.000483042	0.0209872	149.465	159.842	-0.0954773	0.534401	0.999695	Kndc1	7	139894696	139941537	+	10709	protein_coding	kinase non-catalytic C-lobe domain (KIND) containing 1 [Source:MGI Symbol;Acc:MGI:1923734]	-
ENSMUSG00000068696	52.5706	84.8645	-0.691298	0.000714585	0.0504071	67.7815	54.0835	0.325455	0.107187	0.617522	59.6325	53.3506	0.163193	0.467177	0.880205	53.4993	53.8219	-0.00756951	0.975924	0.999695	Gpr88	3	116249654	116253503	-	3504	protein_coding	G-protein coupled receptor 88 [Source:MGI Symbol;Acc:MGI:1927653]	-
ENSMUSG00000110419	243.87	169.887	0.523353	0.000729835	0.0513028	217.578	250.839	-0.206429	0.217589	0.748605	172.21	247.5	-0.526976	0.00162341	0.054128	241.619	249.647	-0.0475774	0.67744	0.999695	AW046200	8	57651757	57663430	+	3082	bidirectional_promoter_lncRNA	expressed sequence AW046200 [Source:MGI Symbol;Acc:MGI:2142745]	-
ENSMUSG00000090291	16.5353	5.48809	1.58977	0.000747269	0.0522875	6.73283	17.0098	-1.34686	0.00131729	0.060953	8.884	16.7803	-0.900931	0.0953833	0.593688	18.8202	16.9285	0.149139	0.625339	0.999695	Lrrc10b	19	10455371	10457447	-	2077	protein_coding	leucine rich repeat containing 10B [Source:MGI Symbol;Acc:MGI:2685551]	-
ENSMUSG00000036357	0.974964	9.68172	-3.3119	0.000749044	0.0522875	1.94413	1.00053	0.95901	0.521665	1	2.64864	0.988481	1.43016	0.313148	1	1.97467	0.998071	0.98397	0.408757	1	Gpr101	X	57496668	57503757	-	5410	protein_coding	G protein-coupled receptor 101 [Source:MGI Symbol;Acc:MGI:2685211]	-
ENSMUSG00000018339	1377.66	247.072	2.47936	0.000775917	0.0539759	1888	1415.21	0.415836	0.548961	0.917493	631.305	1397.89	-1.14687	0.189317	0.722757	1972.36	1409.87	0.484346	0.30878	0.999695	Gpx3	11	54902453	54910377	+	1813	protein_coding	glutathione peroxidase 3 [Source:MGI Symbol;Acc:MGI:105102]	-
ENSMUSG00000086291	353.523	269.224	0.393723	0.000793284	0.0549937	296.217	363.607	-0.296602	0.0211807	0.30679	725.187	358.776	1.01605	1.2308e-17	8.39404e-15	357.095	361.892	-0.0198173	0.852387	0.999695	Gm15513	5	34211810	34213802	-	1569	sense_intronic	predicted gene 15513 [Source:MGI Symbol;Acc:MGI:3782961]	-
ENSMUSG00000038676	14.6144	3.18175	2.18169	0.000813888	0.0562282	9.49081	15.0502	-0.660452	0.233732	0.762124	8.96069	14.832	-0.728682	0.120038	0.638367	15.025	14.9687	0.0049214	0.990015	0.999695	Ucn	5	31138063	31138829	-	504	protein_coding	urocortin [Source:MGI Symbol;Acc:MGI:1276123]	-
ENSMUSG00000040809	9.664	0.737979	3.69024	0.000845106	0.0579864	10.6921	9.96361	0.102787	0.876377	0.979094	0.4799	9.81376	-4.30016	0.000521054	0.0221261	12.4396	9.89667	0.329715	0.641617	0.999695	Chil3	3	106147554	106167564	-	1632	protein_coding	chitinase-like 3 [Source:MGI Symbol;Acc:MGI:1330860]	-
ENSMUSG00000072941	147.925	60.1876	1.29778	0.000842401	0.0579864	184.924	152.045	0.282315	0.529605	0.913316	85.0306	150.11	-0.821603	0.0901488	0.584412	157.43	151.4	0.0555211	0.787451	0.999695	Sod3	5	52363791	52371418	+	3738	protein_coding	superoxide dismutase 3, extracellular [Source:MGI Symbol;Acc:MGI:103181]	-
ENSMUSG00000056501	136.8	51.7717	1.4004	0.000848087	0.057993	120.37	140.861	-0.227225	0.412912	0.865954	58.3672	138.836	-1.247	0.000407521	0.0184913	132.015	140.107	-0.0863912	0.70724	0.999695	Cebpb	2	167688915	167690418	+	1504	protein_coding	CCAAT/enhancer binding protein (C/EBP), beta [Source:MGI Symbol;Acc:MGI:88373]	C/EBP
ENSMUSG00000044986	85.5356	46.4057	0.88401	0.000868427	0.0591826	93.1531	87.9808	0.081083	0.703279	0.952674	66.415	86.7937	-0.384318	0.184159	0.717416	79.2177	87.576	-0.146722	0.451941	0.999695	Tst	15	78399556	78405907	-	3163	protein_coding	thiosulfate sulfurtransferase, mitochondrial [Source:MGI Symbol;Acc:MGI:98852]	-
ENSMUSG00000061536	3227.07	2122.43	0.604646	0.000904804	0.0607069	2941.73	3319.8	-0.174503	0.238777	0.764288	1981.52	3274.83	-0.72467	1.21805e-06	0.000133724	2995.56	3303.92	-0.141437	0.245091	0.999695	Sec22c	9	121680045	121705490	-	6119	protein_coding	SEC22 homolog C, vesicle trafficking protein [Source:MGI Symbol;Acc:MGI:2447871]	-
ENSMUSG00000044252	1010.6	1204.89	-0.253782	0.000905892	0.0607069	1149.17	1039.6	0.144894	0.0357871	0.402373	1186.79	1025.65	0.211354	0.00243047	0.0736207	1080.99	1034.56	0.0631457	0.364574	0.999695	Osbpl1a	18	12755314	12941841	-	7392	protein_coding	oxysterol binding protein-like 1A [Source:MGI Symbol;Acc:MGI:1927551]	-
ENSMUSG00000020953	200.603	294.878	-0.555228	0.000903902	0.0607069	233.676	206.437	0.179214	0.177663	0.709402	252.879	203.601	0.312206	0.030525	0.361007	205.039	205.381	-0.00183755	0.989961	0.999695	Coch	12	51593341	51605771	+	2998	protein_coding	cochlin [Source:MGI Symbol;Acc:MGI:1278313]	-
ENSMUSG00000040605	34.2462	13.2753	1.36824	0.000897842	0.0607069	35.5936	35.2089	0.015469	0.96951	0.995038	26.8735	34.7482	-0.375079	0.340603	0.828511	28.0015	35.0561	-0.324063	0.252932	0.999695	Bace2	16	97356742	97442936	+	7887	protein_coding	beta-site APP-cleaving enzyme 2 [Source:MGI Symbol;Acc:MGI:1860440]	-
ENSMUSG00000075425	30.0861	11.2539	1.41953	0.000896066	0.0607069	21.9498	30.9234	-0.496581	0.131897	0.652591	28.9243	30.5277	-0.0778426	0.803919	0.966864	22.38	30.7943	-0.463806	0.124505	0.999695	Gm13547	2	29759312	29764089	+	843	protein_coding	predicted gene 13547 [Source:MGI Symbol;Acc:MGI:3650473]	-
ENSMUSG00000113780	361.009	252.33	0.516728	0.00092472	0.0615582	314.804	371.272	-0.238468	0.0815029	0.560996	269.089	366.402	-0.445177	0.0013565	0.0471133	358.886	369.514	-0.0423728	0.777228	0.999695	Gm33195	13	43864669	43868589	+	2337	lincRNA	predicted gene, 33195 [Source:MGI Symbol;Acc:MGI:5592354]	-
ENSMUSG00000030095	470.449	357.679	0.395027	0.00092177	0.0615582	403.759	483.906	-0.260728	0.00560273	0.147664	418.598	477.436	-0.188697	0.0841203	0.567	479.605	481.607	-0.00558718	0.949886	0.999695	Tmem43	6	91473703	91488463	+	3973	protein_coding	transmembrane protein 43 [Source:MGI Symbol;Acc:MGI:1921372]	-
ENSMUSG00000042429	413.301	552.219	-0.418423	0.000952573	0.0630233	529.88	425.049	0.317777	0.000930425	0.0493685	561.983	419.45	0.422917	0.000677095	0.0277572	490.212	423.059	0.212856	0.0750427	0.999695	Adora1	1	134199223	134235431	-	5785	protein_coding	adenosine A1 receptor [Source:MGI Symbol;Acc:MGI:99401]	-
ENSMUSG00000042256	8.04914	21.6627	-1.43415	0.000952999	0.0630233	12.2622	8.27524	0.566356	0.227674	0.75879	15.2813	8.1696	0.896003	0.0609241	0.501155	14.7701	8.23707	0.846391	0.109529	0.999695	Ptchd4	17	42315947	42505077	+	4503	protein_coding	patched domain containing 4 [Source:MGI Symbol;Acc:MGI:1920485]	-
ENSMUSG00000049969	1587.25	1910.1	-0.267116	0.000976727	0.0643808	1550.38	1632.49	-0.0745914	0.3832	0.856196	1592.04	1610.8	-0.0172105	0.798281	0.966185	1650.47	1624.85	0.0224366	0.771694	0.999695	Plekhf2	4	10988662	11007927	-	3039	protein_coding	pleckstrin homology domain containing, family F (with FYVE domain) member 2 [Source:MGI Symbol;Acc:MGI:1919051]	-
ENSMUSG00000020062	97.657	138.849	-0.506503	0.000987692	0.0648907	118.825	100.458	0.240785	0.238773	0.764288	72.9672	99.1139	-0.44125	0.0733856	0.542581	118.395	99.9718	0.244387	0.183494	0.999695	Slc5a8	10	88885992	88929515	+	5331	protein_coding	solute carrier family 5 (iodide transporter), member 8 [Source:MGI Symbol;Acc:MGI:2384916]	-
ENSMUSG00000002233	237.469	135.745	0.806958	0.000997434	0.0653173	279.28	244.395	0.192222	0.350532	0.841745	211.403	240.987	-0.188478	0.438518	0.871727	269.839	243.169	0.149477	0.377108	0.999695	Rhoc	3	104788375	104794459	+	1618	protein_coding	ras homolog family member C [Source:MGI Symbol;Acc:MGI:106028]	-
ENSMUSG00000023064	285.896	525.169	-0.87751	0.00100229	0.0654225	255.433	294.285	-0.204042	0.449581	0.881301	433.235	290.154	0.578729	0.00239031	0.0728946	287.837	292.754	-0.0242328	0.899852	0.999695	Sncg	14	34370274	34374789	-	852	protein_coding	synuclein, gamma [Source:MGI Symbol;Acc:MGI:1298397]	-
ENSMUSG00000043391	2281.1	2793.64	-0.292304	0.00101852	0.0659635	2426.6	2346.26	0.0485957	0.648558	0.941536	2834.62	2315.03	0.291805	0.00135646	0.0471133	2416.58	2335.1	0.0495177	0.340638	0.999695	2510009E07Rik	16	21649045	21694665	-	6564	protein_coding	RIKEN cDNA 2510009E07 gene [Source:MGI Symbol;Acc:MGI:1919440]	-
ENSMUSG00000022269	47.8242	25.2991	0.912913	0.00101855	0.0659635	35.7845	49.2244	-0.458869	0.132605	0.654042	27.4742	48.5391	-0.82347	0.00805113	0.165478	31.8609	48.9684	-0.620174	0.0182163	0.999695	2022-03-11	15	26309048	26409576	+	2848	protein_coding	membrane-associated ring finger (C3HC4) 11 [Source:MGI Symbol;Acc:MGI:3608327]	-
ENSMUSG00000031604	637.746	821.673	-0.365628	0.00102043	0.0659635	622.55	655.965	-0.0762027	0.435315	0.874774	698.723	647.217	0.109921	0.283635	0.799735	683.484	652.861	0.0662959	0.330779	0.999695	Msmo1	8	64718139	64733792	-	6144	protein_coding	methylsterol monoxygenase 1 [Source:MGI Symbol;Acc:MGI:1913484]	-
ENSMUSG00000038539	461.951	253.978	0.862352	0.00104342	0.0670188	329.392	475.372	-0.529111	0.00135753	0.062018	210.655	468.826	-1.15216	8.35037e-09	1.49154e-06	385.784	472.974	-0.293683	0.0551323	0.999695	Atf5	7	44812256	44816658	-	1993	protein_coding	activating transcription factor 5 [Source:MGI Symbol;Acc:MGI:2141857]	TF_bZIP
ENSMUSG00000031805	311.607	163.729	0.928863	0.00104237	0.0670188	405.117	320.722	0.336884	0.0914115	0.584416	219.668	316.243	-0.524924	0.180952	0.713466	330.756	319.077	0.0516649	0.796154	0.999695	Jak3	8	71676296	71690575	+	5352	protein_coding	Janus kinase 3 [Source:MGI Symbol;Acc:MGI:99928]	-
ENSMUSG00000022123	28.8179	10.5098	1.45366	0.00105224	0.0671565	34.5074	29.6255	0.221981	0.438427	0.876172	46.2456	29.2469	0.658752	0.0211888	0.295973	30.4976	29.4928	0.0498869	0.854472	0.999695	Scel	14	103513342	103612797	+	2503	protein_coding	sciellin [Source:MGI Symbol;Acc:MGI:1891228]	-
ENSMUSG00000042751	553.25	696.27	-0.331631	0.00104988	0.0671565	547.607	569.046	-0.0551703	0.532792	0.914469	589.994	561.454	0.0712366	0.411205	0.857858	554.146	566.375	-0.0311739	0.685878	0.999695	Nmnat2	1	152954993	153119261	+	5781	protein_coding	nicotinamide nucleotide adenylyltransferase 2 [Source:MGI Symbol;Acc:MGI:2444155]	-
ENSMUSG00000041112	657.794	839.157	-0.351714	0.0010608	0.0674886	782.64	676.54	0.210198	0.0489128	0.458411	944.724	667.609	0.500737	1.59373e-06	0.000169191	657.147	673.325	-0.0348495	0.67713	0.999695	Elmo1	13	20090596	20608353	+	12580	protein_coding	engulfment and cell motility 1 [Source:MGI Symbol;Acc:MGI:2153044]	-
ENSMUSG00000025351	884.621	633.165	0.482479	0.00106806	0.0677357	963.961	910.389	0.0825227	0.593087	0.928998	693.623	897.81	-0.371635	0.0310322	0.364325	932.611	905.746	0.0421456	0.717669	0.999695	Cd63	10	128900989	128912822	+	3682	protein_coding	CD63 antigen [Source:MGI Symbol;Acc:MGI:99529]	-
ENSMUSG00000059895	11144.5	7818.37	0.511372	0.00107242	0.0677987	11497.8	11468	0.00373867	0.977352	0.996588	8548.74	11310.5	-0.403831	0.0090641	0.180209	11402.9	11410.4	-0.000963344	0.991583	0.999695	Ptp4a3	15	73723145	73758766	+	9351	protein_coding	protein tyrosine phosphatase 4a3 [Source:MGI Symbol;Acc:MGI:1277098]	-
ENSMUSG00000041220	754.725	1010.7	-0.421419	0.00107844	0.0679652	807.066	776.151	0.0562941	0.648984	0.941551	881.243	765.948	0.201608	0.110435	0.620653	733.419	772.545	-0.0746024	0.422577	0.999695	Elovl6	3	129532355	129638495	+	6431	protein_coding	ELOVL family member 6, elongation of long chain fatty acids (yeast) [Source:MGI Symbol;Acc:MGI:2156528]	-
ENSMUSG00000015837	3733.65	2866.96	0.380993	0.00111274	0.0696899	3310.72	3841.45	-0.21447	0.0635515	0.510802	3048.13	3789.22	-0.313852	0.000479218	0.0209665	3510.51	3822.52	-0.122804	0.178637	0.999695	Sqstm1	11	50199366	50210827	-	3356	protein_coding	sequestosome 1 [Source:MGI Symbol;Acc:MGI:107931]	-
ENSMUSG00000018774	110.122	63.3505	0.800041	0.00111041	0.0696899	140.802	113.29	0.313205	0.100036	0.601721	72.7304	111.758	-0.614814	0.0260056	0.330294	122.827	112.742	0.123868	0.397092	0.999695	Cd68	11	69664213	69666153	-	1257	protein_coding	CD68 antigen [Source:MGI Symbol;Acc:MGI:88342]	-
ENSMUSG00000031765	1148.57	828.036	0.472083	0.00112226	0.0700678	1412.49	1181.5	0.257814	0.120229	0.637603	847.233	1165.73	-0.459988	0.00336883	0.0928017	1131.36	1175.76	-0.0554325	0.713839	0.999695	Mt1	8	94179082	94180327	+	1246	protein_coding	metallothionein 1 [Source:MGI Symbol;Acc:MGI:97171]	-
ENSMUSG00000097451	1883.08	2360.2	-0.325922	0.001156	0.0717291	2117.17	1936.9	0.128184	0.123524	0.638976	2324.14	1911.04	0.281804	3.05186e-05	0.00217358	1893.71	1927.73	-0.0256231	0.69845	0.999695	Rian	12	109603940	109661716	+	18234	processed_transcript	RNA imprinted and accumulated in nucleus [Source:MGI Symbol;Acc:MGI:1922995]	-
ENSMUSG00000024987	66.6163	38.4264	0.792854	0.00115443	0.0717291	88.2789	68.5441	0.365975	0.120188	0.637603	80.2849	67.6038	0.250249	0.278472	0.797061	67.2906	68.2062	-0.019388	0.921034	0.999695	Cyp26a1	19	37697808	37701528	+	1773	protein_coding	cytochrome P450, family 26, subfamily a, polypeptide 1 [Source:MGI Symbol;Acc:MGI:1096359]	-
ENSMUSG00000015451	87.7866	54.8948	0.675847	0.00116821	0.0720423	92.5532	90.2766	0.033596	0.843771	0.975426	66.2938	89.0866	-0.421081	0.0504449	0.46076	92.2552	89.8639	0.0367577	0.789913	0.999695	C4a	17	34809092	34823464	-	6206	processed_transcript	complement component 4A (Rodgers blood group) [Source:MGI Symbol;Acc:MGI:98320]	-
ENSMUSG00000002249	696.036	454.581	0.614307	0.00116581	0.0720423	682.306	715.956	-0.0700306	0.540324	0.916537	646.34	706.382	-0.127138	0.395098	0.851429	752.085	712.545	0.0772281	0.273485	0.999695	Tead3	17	28331671	28350817	-	6714	protein_coding	TEA domain family member 3 [Source:MGI Symbol;Acc:MGI:109241]	TEA
ENSMUSG00000031297	206.757	131.027	0.656065	0.0011834	0.0727555	96.9543	212.707	-1.1338	4.04525e-11	5.54056e-08	102.486	209.823	-1.03593	2.45516e-13	8.63371e-11	211.63	211.679	-0.000263337	0.998374	0.999695	Slc7a3	X	101079210	101086020	-	3784	protein_coding	solute carrier family 7 (cationic amino acid transporter, y+ system), member 3 [Source:MGI Symbol;Acc:MGI:1100521]	-
ENSMUSG00000090061	225.859	308.371	-0.448959	0.0011956	0.0732817	253.206	232.319	0.124438	0.388155	0.859199	301.544	229.22	0.394951	0.0015282	0.0514107	238.562	231.215	0.0455667	0.656377	0.999695	Nwd2	5	63649102	63810546	+	10428	protein_coding	NACHT and WD repeat domain containing 2 [Source:MGI Symbol;Acc:MGI:1920464]	-
ENSMUSG00000056004	243.541	353.652	-0.537753	0.00121646	0.0743333	272.57	250.494	0.122072	0.352939	0.842167	339.442	247.169	0.45719	0.000102667	0.0059247	261.429	249.301	0.0692214	0.509122	0.999695	9330182L06Rik	5	9266118	9481825	+	7918	protein_coding	RIKEN cDNA 9330182L06 gene [Source:MGI Symbol;Acc:MGI:2443264]	-
ENSMUSG00000004951	118.658	64.3143	0.88164	0.00123042	0.0749585	127.465	122.114	0.0612291	0.774498	0.96308	128.663	120.428	0.0939371	0.635018	0.933359	117.594	121.495	-0.0474472	0.763895	0.999695	Hspb1	5	135887919	135889563	+	1031	protein_coding	heat shock protein 1 [Source:MGI Symbol;Acc:MGI:96240]	-
ENSMUSG00000064357	507.988	758.309	-0.578343	0.00123438	0.074973	621.766	522.338	0.251421	0.105893	0.614225	647.231	515.54	0.328006	0.0231461	0.311559	728.299	519.951	0.486478	0.000886792	0.292011	mt-Atp6	MT	7927	8607	+	681	protein_coding	mitochondrially encoded ATP synthase 6 [Source:MGI Symbol;Acc:MGI:99927]	-
ENSMUSG00000094800	0.777476	10.2725	-3.71528	0.00125834	0.0761978	0.777469	0.799772	-0.0379306	0.980484	1	10.5678	0.788579	3.74347	0.00815037	0.166757	0.39724	0.79643	-0.977124	0.582921	1	Gm9780	14	26027282	26042711	-	1402	protein_coding	predicted gene 9780 [Source:MGI Symbol;Acc:MGI:3710532]	-
ENSMUSG00000046709	1011.68	1355.18	-0.421792	0.00127988	0.0772696	1119.27	1040.29	0.105444	0.310912	0.821215	1245.11	1026.7	0.27805	0.00498865	0.12239	1010.28	1035.54	-0.0354733	0.690472	0.999695	Mapk10	5	102907948	103211334	-	11130	protein_coding	mitogen-activated protein kinase 10 [Source:MGI Symbol;Acc:MGI:1346863]	-
ENSMUSG00000023159	16.2875	4.74247	1.77575	0.00128937	0.0776091	8.19635	16.7347	-1.02542	0.0341404	0.391829	24.1416	16.5293	0.548572	0.157375	0.686802	14.9949	16.6655	-0.154527	0.746344	0.999695	Psg29	7	17203477	17215760	+	5445	protein_coding	pregnancy-specific glycoprotein 29 [Source:MGI Symbol;Acc:MGI:1891361]	-
ENSMUSG00000047786	60.3799	34.5945	0.799843	0.00131915	0.0789662	52.9669	62.0959	-0.231335	0.235827	0.762824	69.4597	61.2772	0.180528	0.45953	0.877802	68.4033	61.806	0.147028	0.441067	0.999695	Lix1	17	17402672	17459387	+	3434	protein_coding	limb and CNS expressed 1 [Source:MGI Symbol;Acc:MGI:1913893]	-
ENSMUSG00000001467	658.935	838.557	-0.347617	0.00131977	0.0789662	659.387	677.685	-0.039977	0.715867	0.955	668.006	668.715	-0.00186819	0.981404	0.997166	759.904	674.526	0.172095	0.0131398	0.999695	Cyp51	5	4081145	4104746	-	4415	protein_coding	cytochrome P450, family 51 [Source:MGI Symbol;Acc:MGI:106040]	-
ENSMUSG00000036480	1289.09	217.546	2.56677	0.00135235	0.0806752	1962.29	1326.38	0.565047	0.273224	0.795098	1536.08	1308.14	0.231684	0.403825	0.854422	1153.56	1319.9	-0.194356	0.745372	0.999695	Prss56	1	87183313	87188405	+	2180	protein_coding	protease, serine 56 [Source:MGI Symbol;Acc:MGI:1916703]	-
ENSMUSG00000117296	136.965	55.9025	1.29517	0.00136283	0.0810604	128.585	140.917	-0.133892	0.590952	0.928658	51.7688	138.989	-1.42191	0.000261345	0.0127588	125.787	140.236	-0.158439	0.534822	0.999695	CT025671.4	17	66193352	66199820	+	3450	lincRNA	novel transcript	-
ENSMUSG00000027864	186.567	255.405	-0.453377	0.00137821	0.0817333	218.057	191.916	0.183388	0.250532	0.773884	188.896	189.332	-0.00307291	0.982202	0.997166	197.337	191.002	0.046715	0.707212	0.999695	Ptgfrn	3	101040232	101110278	-	10464	protein_coding	prostaglandin F2 receptor negative regulator [Source:MGI Symbol;Acc:MGI:1277114]	-
ENSMUSG00000029816	425.726	206.281	1.04582	0.00139206	0.0823116	344.742	437.438	-0.34354	0.361987	0.847615	208.396	431.909	-1.05201	0.00716648	0.154806	325.587	435.759	-0.420694	0.285413	0.999695	Gpnmb	6	49036546	49070929	+	6514	protein_coding	glycoprotein (transmembrane) nmb [Source:MGI Symbol;Acc:MGI:1934765]	-
ENSMUSG00000116358	13.0652	30.5682	-1.225	0.00141078	0.0829437	20.0358	13.4314	0.574931	0.117296	0.633633	26.5001	13.2555	0.999831	0.00639091	0.143441	14.8591	13.3754	0.149947	0.681208	0.999695	Gm49450	15	98932137	98953551	-	899	protein_coding	predicted gene, 49450 [Source:MGI Symbol;Acc:MGI:6155101]	-
ENSMUSG00000029207	506.048	702.56	-0.473683	0.001411	0.0829437	532.217	520.396	0.0326374	0.795081	0.967053	544.69	513.579	0.0852608	0.493324	0.889729	509.774	517.987	-0.0225488	0.837782	0.999695	Apbb2	5	66298703	66618784	-	10966	protein_coding	amyloid beta (A4) precursor protein-binding, family B, member 2 [Source:MGI Symbol;Acc:MGI:108405]	-
ENSMUSG00000028465	1426.41	1191.04	0.2605	0.00142331	0.0834231	1463.82	1467.17	-0.00335301	0.966877	0.994897	1328.32	1447.59	-0.12381	0.0858116	0.572739	1509.8	1460.21	0.0479934	0.50408	0.999695	Tln1	4	43531519	43562691	-	9801	protein_coding	talin 1 [Source:MGI Symbol;Acc:MGI:1099832]	-
ENSMUSG00000025403	850.24	658.042	0.369405	0.00144228	0.0842893	722.62	874.705	-0.275138	0.0157671	0.267166	644.673	862.905	-0.419733	1.90921e-05	0.00143229	855.41	870.436	-0.024814	0.75344	0.999695	Shmt2	10	127517123	127522444	-	3109	protein_coding	serine hydroxymethyltransferase 2 (mitochondrial) [Source:MGI Symbol;Acc:MGI:1277989]	-
ENSMUSG00000029875	126.695	197.808	-0.643283	0.0014483	0.0842912	188.623	130.397	0.532275	0.00345	0.110077	195.513	128.579	0.603742	0.000278403	0.0134656	133.656	129.731	0.0431331	0.801944	0.999695	Ccdc184	15	98167158	98170134	+	2977	protein_coding	coiled-coil domain containing 184 [Source:MGI Symbol;Acc:MGI:2146066]	-
ENSMUSG00000041559	178.766	97.9247	0.869995	0.00145244	0.0842912	230.918	183.788	0.329344	0.510436	0.906866	113.492	181.41	-0.676756	0.00725471	0.155409	229.373	182.984	0.325774	0.0756399	0.999695	Fmod	1	134037254	134048277	+	3306	protein_coding	fibromodulin [Source:MGI Symbol;Acc:MGI:1328364]	-
ENSMUSG00000018326	3651.02	4227.4	-0.211593	0.00145489	0.0842912	3877.71	3755.73	0.0460989	0.370538	0.850445	3913.58	3705.35	0.0788121	0.106347	0.614495	3942.3	3737.64	0.0769339	0.0390985	0.999695	Ywhab	2	163994960	164018588	+	3382	protein_coding	tyrosine 3-monooxygenase/tryptophan 5-monooxygenase activation protein, beta polypeptide [Source:MGI Symbol;Acc:MGI:1891917]	-
ENSMUSG00000037552	180.126	125.145	0.526176	0.00147227	0.0850531	175.517	185.296	-0.0782871	0.588653	0.927943	136.069	182.802	-0.422656	0.00231925	0.0714049	167.064	184.408	-0.143593	0.325125	0.999695	Plekhg2	7	28359604	28372599	-	6797	protein_coding	pleckstrin homology domain containing, family G (with RhoGef domain) member 2 [Source:MGI Symbol;Acc:MGI:2141874]	-
ENSMUSG00000100303	3.27538	15.9982	-2.27973	0.00149707	0.0862379	11.991	3.36556	1.82213	0.0053436	0.144369	10.356	3.3236	1.62889	0.0486106	0.45339	3.76393	3.35263	0.160518	0.858473	1	2600014E21Rik	2	75138843	75317820	+	7972	lincRNA	RIKEN cDNA 2600014E21 gene [Source:MGI Symbol;Acc:MGI:1919384]	-
ENSMUSG00000034361	88.3801	58.2854	0.600476	0.00153727	0.088301	96.9943	90.8906	0.0945928	0.578495	0.92619	84.7609	89.688	-0.0783408	0.702503	0.948197	92.1275	90.472	0.0251381	0.884053	0.999695	Cpne2	8	94532990	94570531	+	3200	protein_coding	copine II [Source:MGI Symbol;Acc:MGI:2387578]	-
ENSMUSG00000025189	686.054	856.008	-0.319733	0.00154549	0.0885202	750.502	705.695	0.08893	0.285488	0.803688	847.13	696.271	0.283491	4.532e-05	0.00299992	695.884	702.311	-0.0131076	0.834631	0.999695	Cnnm1	19	43440436	43497210	+	5717	protein_coding	cyclin M1 [Source:MGI Symbol;Acc:MGI:1891366]	-
ENSMUSG00000041362	283.576	357.233	-0.333428	0.00157969	0.0902217	335.814	291.741	0.203184	0.0317685	0.379726	285.069	287.807	-0.0131797	0.895599	0.983134	286.117	290.305	-0.020648	0.844073	0.999695	Shtn1	19	58973358	59076069	-	4081	protein_coding	shootin 1 [Source:MGI Symbol;Acc:MGI:1918903]	-
ENSMUSG00000053965	108.577	161.035	-0.566559	0.00159588	0.0908458	125.298	111.629	0.164692	0.373298	0.851022	137.82	110.177	0.31974	0.0789041	0.55397	115.717	111.141	0.057502	0.71664	0.999695	Pde5a	3	122728947	122859374	+	9831	protein_coding	phosphodiesterase 5A, cGMP-specific [Source:MGI Symbol;Acc:MGI:2651499]	-
ENSMUSG00000022425	653.205	900.936	-0.463825	0.00159965	0.0908458	670.239	671.642	-0.00309611	0.987145	0.998603	690.111	662.889	0.0575289	0.62229	0.930149	754.331	668.602	0.173948	0.0630929	0.999695	Enpp2	15	54838901	54952892	-	5779	protein_coding	ectonucleotide pyrophosphatase/phosphodiesterase 2 [Source:MGI Symbol;Acc:MGI:1321390]	-
ENSMUSG00000016346	1431.85	1886.22	-0.397596	0.00165378	0.0936283	1596.18	1472.38	0.116285	0.24282	0.766884	1932.37	1453.07	0.411161	1.46373e-05	0.00114783	1474.31	1465.66	0.00846196	0.927377	0.999695	Kcnq2	2	181075579	181135300	-	16273	protein_coding	potassium voltage-gated channel, subfamily Q, member 2 [Source:MGI Symbol;Acc:MGI:1309503]	-
ENSMUSG00000037419	653.962	828.525	-0.341261	0.00165796	0.0936283	693.828	672.711	0.0448693	0.558472	0.919501	718.257	663.686	0.113591	0.187268	0.720399	657.626	669.493	-0.0259688	0.725079	0.999695	Endod1	9	14353990	14381507	-	4645	protein_coding	endonuclease domain containing 1 [Source:MGI Symbol;Acc:MGI:1919196]	-
ENSMUSG00000040855	637.386	886.902	-0.476421	0.00169452	0.0954248	571.698	655.559	-0.19764	0.144537	0.670865	684.93	646.879	0.0816515	0.529395	0.900383	587.745	652.451	-0.150224	0.0607705	0.999695	Reps2	X	162411954	162643649	-	8296	protein_coding	RALBP1 associated Eps domain containing protein 2 [Source:MGI Symbol;Acc:MGI:2663511]	-
ENSMUSG00000021680	157.156	68.2981	1.20333	0.00171352	0.0962249	156	161.534	-0.0503176	0.921622	0.986199	61.2216	159.486	-1.38454	0.000126578	0.00706887	178.823	160.838	0.15292	0.53611	0.999695	Crhbp	13	95431371	95444924	-	1800	protein_coding	corticotropin releasing hormone binding protein [Source:MGI Symbol;Acc:MGI:88497]	-
ENSMUSG00000095526	13.6416	29.3998	-1.10462	0.00172783	0.0967587	21.1128	14.0276	0.589992	0.111036	0.623685	21.6179	13.8439	0.636255	0.0933197	0.589992	13.8787	13.9632	-0.0117602	0.97304	0.999695	Gm10243	6	48523518	48523850	+	333	processed_pseudogene	predicted gene 10243 [Source:MGI Symbol;Acc:MGI:3704266]	-
ENSMUSG00000043388	1107.59	1313.87	-0.246729	0.00174038	0.0971907	1255.98	1139.43	0.140699	0.0814222	0.560878	1302.44	1124.1	0.211822	0.0011603	0.0419458	1104.72	1133.87	-0.0373237	0.484796	0.999695	Tmem130	5	144735915	144761818	-	2903	protein_coding	transmembrane protein 130 [Source:MGI Symbol;Acc:MGI:3607706]	-
ENSMUSG00000032359	338.237	245.993	0.460917	0.00175411	0.0976861	511.935	347.947	0.557093	0.000457506	0.0324893	327.546	343.255	-0.0660043	0.687146	0.946358	392.708	346.281	0.181109	0.140871	0.999695	Ctsh	9	90054152	90076089	+	4499	protein_coding	cathepsin H [Source:MGI Symbol;Acc:MGI:107285]	-
ENSMUSG00000030559	27.7452	12.2448	1.17848	0.00177595	0.0984883	26.9758	28.5164	-0.0791221	0.842965	0.975021	18.2542	28.1563	-0.627892	0.0983102	0.600243	24.6694	28.3956	-0.205446	0.508322	0.999695	Rab38	7	88430273	88491572	+	1577	protein_coding	RAB38, member RAS oncogene family [Source:MGI Symbol;Acc:MGI:1919683]	-
ENSMUSG00000050192	402.234	565.54	-0.491245	0.00177832	0.0984883	436.465	413.732	0.0770191	0.528983	0.913129	461.26	408.222	0.174747	0.145494	0.674872	436.311	411.763	0.0842682	0.320038	0.999695	Eif5a2	3	28781276	28798846	+	5027	protein_coding	eukaryotic translation initiation factor 5A2 [Source:MGI Symbol;Acc:MGI:1933735]	-
ENSMUSG00000038331	42.135	70.0758	-0.735825	0.0017986	0.099338	42.0999	43.3185	-0.0411354	0.889962	0.980959	50.9752	42.7618	0.251118	0.354701	0.837749	35.5906	43.1226	-0.275431	0.333312	0.999695	Satb2	1	56793981	56978650	-	6788	protein_coding	special AT-rich sequence binding protein 2 [Source:MGI Symbol;Acc:MGI:2679336]	CUT
ENSMUSG00000054136	16.8053	6.2462	1.42557	0.00180657	0.0993589	0.786789	17.2969	-4.46098	5.65194e-08	3.04193e-05	1.19959	17.0569	-3.78533	7.95814e-07	9.13806e-05	13.2576	17.2062	-0.375685	0.316713	0.999695	Adm2	15	89322720	89324731	+	1298	protein_coding	adrenomedullin 2 [Source:MGI Symbol;Acc:MGI:2675256]	-
ENSMUSG00000023000	396.192	290.544	0.448294	0.00180886	0.0993589	422.871	407.396	0.0532707	0.724312	0.955714	329.247	402.056	-0.287271	0.0935609	0.589992	414.335	405.548	0.0306585	0.81905	0.999695	Dhh	15	98891152	98898540	-	4399	protein_coding	desert hedgehog [Source:MGI Symbol;Acc:MGI:94891]	-
ENSMUSG00000051860	3078.66	2289.83	0.427108	0.00182056	0.099437	2695.53	3165.72	-0.232016	0.0573375	0.485938	2494.17	3124.46	-0.325006	0.00472513	0.117767	2983.54	3151.17	-0.0788084	0.426315	0.999695	Samd7	3	30746293	30767174	+	3999	protein_coding	sterile alpha motif domain containing 7 [Source:MGI Symbol;Acc:MGI:1923203]	-
ENSMUSG00000042064	5.14689	21.024	-2.03522	0.00183996	0.099437	19.059	5.29145	1.85332	0.00264872	0.0938848	17.0833	5.22567	1.71838	0.00479339	0.119073	11.2676	5.26497	1.10624	0.0513135	1	Myo3b	2	70039126	70429198	+	7039	protein_coding	myosin IIIB [Source:MGI Symbol;Acc:MGI:2448580]	-
ENSMUSG00000054520	90.9177	55.8736	0.703644	0.00183525	0.099437	108.889	93.5494	0.217367	0.246145	0.769866	64.1869	92.2654	-0.521878	0.0376471	0.403854	85.8967	93.093	-0.117245	0.532388	0.999695	Sh3bp2	5	34525838	34563641	+	4296	protein_coding	SH3-domain binding protein 2 [Source:MGI Symbol;Acc:MGI:1346349]	-
ENSMUSG00000024378	369.792	519.955	-0.491529	0.00181866	0.099437	319.255	380.308	-0.253194	0.117786	0.634205	415.566	375.269	0.145597	0.229745	0.760927	393.247	378.546	0.0549833	0.603248	0.999695	Stard4	18	33199355	33213862	-	5586	protein_coding	StAR-related lipid transfer (START) domain containing 4 [Source:MGI Symbol;Acc:MGI:2156764]	-
ENSMUSG00000096515	32.4676	0	7.45981	0.00182626	0.099437	27.2486	33.4324	-0.294897	0.86585	0.978146	50.5365	32.9373	0.617818	0.763174	0.96153	9.13032	33.2736	-1.86512	0.378829	0.999695	Igkv14-100	6	68519012	68519477	+	353	IG_V_gene	immunoglobulin kappa chain variable 14-100 [Source:MGI Symbol;Acc:MGI:4439559]	-
ENSMUSG00000032231	219.12	146.899	0.578126	0.00183818	0.099437	239.497	225.45	0.08676	0.65765	0.942366	221.347	222.369	-0.00778682	0.972063	0.99528	239.003	224.35	0.090512	0.590311	0.999695	Anxa2	9	69453620	69491795	+	3731	protein_coding	annexin A2 [Source:MGI Symbol;Acc:MGI:88246]	-
ENSMUSG00000095139	25.2598	46.3208	-0.876327	0.00185486	0.0999734	26.0225	25.9705	0.00154239	0.995914	0.999525	38.7335	25.6338	0.590244	0.0731093	0.541994	24.8731	25.856	-0.057708	0.839688	0.999695	Pou3f2	4	22482780	22488366	-	5587	protein_coding	POU domain, class 3, transcription factor 2 [Source:MGI Symbol;Acc:MGI:101895]	Pou
ENSMUSG00000039809	612.216	842.442	-0.460825	0.00186472	0.100236	696.713	629.597	0.146148	0.227883	0.759065	878.644	621.307	0.49995	1.50472e-07	2.04007e-05	599.793	626.684	-0.0631705	0.502981	0.999695	Gabbr2	4	46662305	46991873	-	6686	protein_coding	gamma-aminobutyric acid (GABA) B receptor, 2 [Source:MGI Symbol;Acc:MGI:2386030]	-
ENSMUSG00000027080	575.319	710.142	-0.303646	0.00189417	0.101548	676.479	591.79	0.193389	0.0095936	0.204183	673.383	583.891	0.205038	0.00857508	0.173553	644.167	588.946	0.129496	0.0897695	0.999695	Med19	2	84678402	84688215	+	2059	protein_coding	mediator complex subunit 19 [Source:MGI Symbol;Acc:MGI:1914234]	-
ENSMUSG00000106746	7.2367	18.7852	-1.37705	0.00190135	0.101662	12.1884	7.44279	0.711431	0.107805	0.617522	16.9543	7.34568	1.20664	0.0068703	0.150613	10.3505	7.40672	0.480315	0.300212	1	2900064F13Rik	5	81826816	81827823	+	1008	TEC	RIKEN cDNA 2900064F13 gene [Source:MGI Symbol;Acc:MGI:1920293]	-
ENSMUSG00000024423	2721.85	3288.71	-0.272986	0.00191018	0.101863	2764.98	2799.56	-0.0179648	0.823674	0.971402	3029.89	2762.37	0.133162	0.0296057	0.355553	2792.99	2786.25	0.00353327	0.945172	0.999695	Impact	18	12972252	12992948	+	3432	protein_coding	impact, RWD domain protein [Source:MGI Symbol;Acc:MGI:1098233]	-
ENSMUSG00000021266	1475.28	1255.84	0.232107	0.00193359	0.102838	1232.24	1517.65	-0.300611	3.40993e-05	0.0053646	1184.84	1497.23	-0.33759	2.0562e-07	2.70625e-05	1334.55	1510.33	-0.178245	0.00476841	0.736404	Wars	12	108860030	108894174	-	3447	protein_coding	tryptophanyl-tRNA synthetase [Source:MGI Symbol;Acc:MGI:104630]	-
ENSMUSG00000016382	499.489	657.617	-0.396379	0.00194854	0.10336	425.126	513.793	-0.273828	0.0016328	0.07075	511.71	506.933	0.0125524	0.891917	0.982292	477.251	511.319	-0.0990839	0.256229	0.999695	Pls3	X	75785654	75875182	-	4238	protein_coding	plastin 3 (T-isoform) [Source:MGI Symbol;Acc:MGI:104807]	-
ENSMUSG00000062184	101.304	146.26	-0.53195	0.00195793	0.103585	99.5035	104.2	-0.063609	0.73765	0.957214	118.04	102.821	0.199156	0.273392	0.796224	98.6346	103.696	-0.0691344	0.658667	0.999695	Hs6st2	X	51387212	51681856	-	7807	protein_coding	heparan sulfate 6-O-sulfotransferase 2 [Source:MGI Symbol;Acc:MGI:1354959]	-
ENSMUSG00000009092	39.7668	17.2731	1.19395	0.00196747	0.103816	43.281	40.9151	0.085416	0.743089	0.95793	22.6077	40.3631	-0.833651	0.0262812	0.332295	37.7712	40.7084	-0.103843	0.677617	0.999695	Derl3	10	75893413	75895941	+	1993	protein_coding	Der1-like domain family, member 3 [Source:MGI Symbol;Acc:MGI:1917627]	-
ENSMUSG00000044461	393.259	311.888	0.333972	0.00198106	0.103988	378.342	404.564	-0.0967158	0.433715	0.874352	304.209	399.107	-0.393698	0.000575195	0.0239729	379.548	402.602	-0.0851293	0.278443	0.999695	Shisa2	14	59625308	59631660	+	3672	protein_coding	shisa family member 2 [Source:MGI Symbol;Acc:MGI:2444716]	-
ENSMUSG00000031376	237.058	336.767	-0.506665	0.00197669	0.103988	233.855	243.71	-0.0601233	0.726071	0.955714	318.151	240.561	0.402183	0.0231989	0.311897	242.303	242.641	-0.00197615	0.989252	0.999695	Atp2b3	X	73503086	73571005	+	4820	protein_coding	ATPase, Ca++ transporting, plasma membrane 3 [Source:MGI Symbol;Acc:MGI:1347353]	-
ENSMUSG00000084821	11.3785	1.76771	2.68771	0.00200191	0.104808	5.00515	11.7118	-1.214	0.1011	0.603529	8.93305	11.5532	-0.381891	0.601671	0.92601	9.69888	11.6462	-0.258221	0.683538	0.999695	Gm15880	7	80636017	80644384	+	2884	antisense	predicted gene 15880 [Source:MGI Symbol;Acc:MGI:3802014]	-
ENSMUSG00000028063	299.788	188.498	0.668653	0.00206798	0.107986	280.846	308.481	-0.135261	0.393642	0.861981	261.794	304.239	-0.215356	0.176286	0.707722	294.904	306.949	-0.0579458	0.62872	0.999695	Lmna	3	88480147	88509956	-	5838	protein_coding	lamin A [Source:MGI Symbol;Acc:MGI:96794]	-
ENSMUSG00000045034	19.378	35.8083	-0.887325	0.00208183	0.108428	26.0324	19.9386	0.387247	0.224185	0.755237	32.4458	19.6676	0.72187	0.0190608	0.281483	21.2188	19.8384	0.0972334	0.734839	0.999695	Ankrd34b	13	92425896	92441658	+	4748	protein_coding	ankyrin repeat domain 34B [Source:MGI Symbol;Acc:MGI:2443245]	-
ENSMUSG00000040663	139.754	77.7131	0.844288	0.00208868	0.108503	113.562	143.772	-0.340621	0.0824636	0.562557	103.038	141.825	-0.458541	0.0235435	0.314343	124.867	143.076	-0.196052	0.317851	0.999695	Clcf1	19	4214238	4223490	+	3713	protein_coding	cardiotrophin-like cytokine factor 1 [Source:MGI Symbol;Acc:MGI:1930088]	-
ENSMUSG00000032854	1.53336	9.08585	-2.54736	0.00210805	0.109228	3.74088	1.5807	1.2289	0.192363	1	4.5618	1.55639	1.53277	0.145001	0.674051	1.19901	1.57114	-0.403231	0.7631	1	Ugt8a	3	125865271	125938619	-	4536	protein_coding	UDP galactosyltransferase 8A [Source:MGI Symbol;Acc:MGI:109522]	-
ENSMUSG00000030303	88.7077	131.936	-0.573239	0.00216922	0.112108	109.031	91.2155	0.257772	0.193887	0.725475	127.474	90.0295	0.501775	0.00321368	0.0899591	98.9734	90.7956	0.125615	0.425152	0.999695	Far2	6	148047259	148182758	+	7313	protein_coding	fatty acyl CoA reductase 2 [Source:MGI Symbol;Acc:MGI:2687035]	-
ENSMUSG00000047414	292.446	419.404	-0.51984	0.00217992	0.112372	300.16	300.766	-0.00338892	0.977788	0.996697	365.254	296.799	0.297852	0.0129035	0.225521	310.27	299.352	0.0523984	0.578876	0.999695	Flrt2	12	95692226	95785215	+	7721	protein_coding	fibronectin leucine rich transmembrane protein 2 [Source:MGI Symbol;Acc:MGI:3603594]	-
ENSMUSG00000040562	12.0464	2.25884	2.41805	0.00218779	0.112489	18.3534	12.3743	0.567915	0.365405	0.848035	1.99125	12.2196	-2.61993	0.000910147	0.0347772	16.8399	12.3311	0.446295	0.296814	0.999695	Gstm2	3	107981702	107986453	-	1679	protein_coding	glutathione S-transferase, mu 2 [Source:MGI Symbol;Acc:MGI:95861]	-
ENSMUSG00000030306	339.694	446.839	-0.395121	0.00219691	0.11267	375.539	349.398	0.103923	0.387553	0.858898	402.097	344.765	0.221293	0.0464454	0.443675	361.855	347.722	0.0582321	0.548362	0.999695	Tmtc1	6	148232430	148444389	-	8578	protein_coding	transmembrane and tetratricopeptide repeat containing 1 [Source:MGI Symbol;Acc:MGI:3039590]	-
ENSMUSG00000024664	350.147	264.232	0.406525	0.00221393	0.113254	343.841	360.162	-0.0667869	0.650355	0.941551	262.971	355.33	-0.432671	0.0078041	0.163082	352.946	358.472	-0.0230359	0.828885	0.999695	Fads3	19	10041548	10059671	+	3269	protein_coding	fatty acid desaturase 3 [Source:MGI Symbol;Acc:MGI:1928740]	-
ENSMUSG00000000753	99.3202	64.4731	0.626399	0.00222088	0.113321	90.0343	102.192	-0.182852	0.310804	0.821215	92.6446	100.797	-0.118952	0.581028	0.91918	106.874	101.69	0.0720958	0.669881	0.999695	Serpinf1	11	75409769	75422701	-	2359	protein_coding	serine (or cysteine) peptidase inhibitor, clade F, member 1 [Source:MGI Symbol;Acc:MGI:108080]	-
ENSMUSG00000101429	196.27	250.21	-0.350608	0.00226612	0.11531	208.036	201.935	0.0430893	0.881308	0.979705	294.954	199.199	0.565804	3.95127e-06	0.000378414	228.707	200.935	0.186905	0.155833	0.999695	BC055402	1	57200645	57214993	-	3301	lincRNA	cDNA sequence BC055402 [Source:MGI Symbol;Acc:MGI:3039597]	-
ENSMUSG00000054162	849.138	1079.25	-0.345819	0.00227132	0.11531	942.78	873.553	0.109824	0.168974	0.699944	980.195	861.781	0.184758	0.0493158	0.455172	884.432	869.314	0.0252015	0.749172	0.999695	Spock3	8	62951009	63357103	+	6046	protein_coding	sparc/osteonectin, cwcv and kazal-like domains proteoglycan 3 [Source:MGI Symbol;Acc:MGI:1920152]	-
ENSMUSG00000046613	178.481	283.832	-0.669896	0.00236409	0.119416	226.874	183.594	0.305826	0.0304419	0.370199	295.367	181.137	0.705991	2.18509e-08	3.46321e-06	172.933	182.714	-0.0793341	0.519126	0.999695	Vwa5b2	16	20589471	20605377	+	7589	protein_coding	von Willebrand factor A domain containing 5B2 [Source:MGI Symbol;Acc:MGI:2681859]	-
ENSMUSG00000046618	151.818	64.5849	1.23394	0.00235861	0.119416	148.107	156.02	-0.0750312	0.858985	0.977424	95.819	154.072	-0.685424	0.143278	0.671835	188.641	155.368	0.280066	0.416502	0.999695	Olfml2a	2	38931978	38963753	+	5579	protein_coding	olfactomedin-like 2A [Source:MGI Symbol;Acc:MGI:2444741]	-
ENSMUSG00000025477	571.738	692.686	-0.277274	0.00240186	0.120588	694.542	588.164	0.240071	0.000594893	0.0386246	714.272	580.266	0.300127	0.000787887	0.0313844	603.492	585.297	0.0447478	0.548799	0.999695	Inpp5a	7	139389109	139579652	+	5649	protein_coding	inositol polyphosphate-5-phosphatase A [Source:MGI Symbol;Acc:MGI:2686961]	-
ENSMUSG00000048402	71.2015	41.7064	0.772717	0.00240529	0.120588	51.8279	73.2067	-0.49809	0.0342585	0.392285	45.1967	72.256	-0.672339	0.00291909	0.0836904	59.0146	72.8788	-0.304069	0.0793067	0.999695	Gli2	1	118834132	119053619	-	6869	protein_coding	GLI-Kruppel family member GLI2 [Source:MGI Symbol;Acc:MGI:95728]	zf-C2H2
ENSMUSG00000068617	5.3158	15.3064	-1.53106	0.00240017	0.120588	9.24482	5.46992	0.762563	0.112411	0.624443	5.83879	5.39618	0.106472	0.867362	0.978248	5.90447	5.44148	0.127502	0.815136	1	Efcab1	16	14906606	14981371	+	4431	protein_coding	EF-hand calcium binding domain 1 [Source:MGI Symbol;Acc:MGI:1914043]	-
ENSMUSG00000058354	7.48243	0.245744	4.61637	0.00241624	0.120836	0.586253	7.70471	-3.70723	0.00539195	0.144909	65.4413	7.602	3.10725	NA	1	4.02091	7.65539	-0.92771	0.370363	1	Krt6a	15	101689910	101694307	-	2418	protein_coding	keratin 6A [Source:MGI Symbol;Acc:MGI:1100845]	-
ENSMUSG00000024120	1649.45	1953	-0.243571	0.00247596	0.123516	1730.76	1696.6	0.0286307	0.754991	0.960169	1781.13	1673.95	0.0889081	0.300346	0.810524	1754.77	1688.58	0.0553228	0.316559	0.999695	Lrpprc	17	84705247	84790789	-	8504	protein_coding	leucine-rich PPR-motif containing [Source:MGI Symbol;Acc:MGI:1919666]	-
ENSMUSG00000047606	63.5942	107.346	-0.753484	0.00253849	0.126321	102.867	65.4019	0.652245	0.000128512	0.0138504	108.772	64.5374	0.748403	0.0002758	0.0134064	61.5408	65.0996	-0.0818752	0.627121	0.999695	Ankrd34c	9	89725245	89738475	-	5487	protein_coding	ankyrin repeat domain 34C [Source:MGI Symbol;Acc:MGI:2685617]	-
ENSMUSG00000028600	59.4403	32.7017	0.860213	0.00256698	0.127183	69.7807	61.0937	0.192086	0.543813	0.916728	41.6829	60.3205	-0.530018	0.0852135	0.57055	57.5412	60.832	-0.0785133	0.751749	0.999695	Podn	4	108014791	108096445	-	4270	protein_coding	podocan [Source:MGI Symbol;Acc:MGI:2674939]	-
ENSMUSG00000010660	280.17	213.241	0.393531	0.00256845	0.127183	253.307	288.272	-0.186523	0.0877203	0.576126	252.172	284.346	-0.172815	0.128902	0.653882	259.144	286.839	-0.147049	0.14577	0.999695	Plcd1	9	119071527	119093502	-	3093	protein_coding	phospholipase C, delta 1 [Source:MGI Symbol;Acc:MGI:97614]	-
ENSMUSG00000037465	178.093	132.824	0.423624	0.0026038	0.128113	158.885	183.147	-0.205076	0.0954956	0.592739	129.273	180.728	-0.482381	0.000823884	0.032645	158.016	182.31	-0.206172	0.167234	0.999695	Klf10	15	38291463	38300706	-	4179	protein_coding	Kruppel-like factor 10 [Source:MGI Symbol;Acc:MGI:1101353]	zf-C2H2
ENSMUSG00000036782	216.595	308.067	-0.507324	0.00259943	0.128113	267.648	222.745	0.264042	0.0132201	0.245351	263.05	219.809	0.258711	0.0221053	0.301699	242.483	221.714	0.129315	0.224587	0.999695	Klhl13	X	23219271	23365082	-	4253	protein_coding	kelch-like 13 [Source:MGI Symbol;Acc:MGI:1914705]	-
ENSMUSG00000042784	36.68	16.8442	1.13286	0.00260636	0.128113	44.5145	37.7353	0.238223	0.417982	0.8678	39.2415	37.2268	0.0745565	0.851842	0.975156	37.2313	37.5511	-0.0131177	0.960618	0.999695	Muc1	3	89229057	89233381	+	2346	protein_coding	mucin 1, transmembrane [Source:MGI Symbol;Acc:MGI:97231]	-
ENSMUSG00000039252	216.317	289.587	-0.420303	0.00262699	0.128812	170.483	222.498	-0.384583	0.00224043	0.084541	145.306	219.527	-0.596762	2.46617e-05	0.00179624	182.78	221.454	-0.276725	0.0232193	0.999695	Lgi2	5	52533517	52566462	-	6528	protein_coding	leucine-rich repeat LGI family, member 2 [Source:MGI Symbol;Acc:MGI:2180196]	-
ENSMUSG00000029171	182.212	134.714	0.435763	0.00265677	0.129955	163.823	187.431	-0.194204	0.0837069	0.566038	132.503	184.93	-0.477667	0.0022663	0.0701585	184.712	186.524	-0.0143566	0.893591	0.999695	Pgm1	5	64092950	64128351	+	2590	protein_coding	phosphoglucomutase 1 [Source:MGI Symbol;Acc:MGI:97564]	-
ENSMUSG00000034755	77.309	128.69	-0.73393	0.00269008	0.130948	70.7537	79.4859	-0.169585	0.467552	0.88937	86.1472	78.4482	0.134198	0.484622	0.886596	80.8384	79.1385	0.0301014	0.888427	0.999695	Pcdh11x	X	120290259	120910619	+	13946	protein_coding	protocadherin 11 X-linked [Source:MGI Symbol;Acc:MGI:2442849]	-
ENSMUSG00000061911	648.068	834.651	-0.364718	0.00268511	0.130948	681.358	666.473	0.0316909	0.849459	0.976019	638.914	657.691	-0.0424515	0.650823	0.937831	659.797	663.384	-0.00775721	0.929888	0.999695	Myt1l	12	29528384	29923213	+	14018	protein_coding	myelin transcription factor 1-like [Source:MGI Symbol;Acc:MGI:1100511]	zf-C2HC
ENSMUSG00000037071	159.726	219.684	-0.45945	0.00277354	0.134684	186.095	164.261	0.17848	0.19745	0.728425	190.616	162.087	0.231531	0.10436	0.610093	169.479	163.509	0.0518173	0.744024	0.999695	Scd1	19	44394451	44407709	-	4836	protein_coding	stearoyl-Coenzyme A desaturase 1 [Source:MGI Symbol;Acc:MGI:98239]	-
ENSMUSG00000024758	7408.21	8968.66	-0.275732	0.00281627	0.135775	7865.07	7620.49	0.0455705	0.406367	0.863476	8323.25	7518.48	0.146536	0.0116459	0.210355	7816.52	7583.87	0.0435953	0.298119	0.999695	Rtn3	19	7425901	7483289	-	5030	protein_coding	reticulon 3 [Source:MGI Symbol;Acc:MGI:1339970]	-
ENSMUSG00000020592	29.686	14.4444	1.0474	0.00281032	0.135775	43.7358	30.5414	0.519755	0.0709202	0.532387	35.9	30.1254	0.245203	0.540124	0.904939	38.8343	30.3938	0.355157	0.201909	0.999695	Sdc1	12	8771323	8793715	+	3809	protein_coding	syndecan 1 [Source:MGI Symbol;Acc:MGI:1349162]	-
ENSMUSG00000004231	23.0563	10.226	1.1697	0.00280944	0.135775	22.1206	23.7325	-0.0995393	0.7401	0.957676	22.2488	23.3994	-0.070407	0.861234	0.977159	20.8633	23.6101	-0.174836	0.569377	0.999695	Pax2	19	44756045	44837871	+	5409	protein_coding	paired box 2 [Source:MGI Symbol;Acc:MGI:97486]	PAX
ENSMUSG00000037638	50.3626	27.494	0.878562	0.002842	0.136585	46.6841	51.8321	-0.15272	0.489386	0.897901	34.4119	51.1103	-0.567463	0.0762093	0.548409	56.5368	51.5687	0.131049	0.540462	0.999695	Zbtb42	12	112678828	112682747	+	3490	protein_coding	zinc finger and BTB domain containing 42 [Source:MGI Symbol;Acc:MGI:3644133]	ZBTB
ENSMUSG00000050271	94.3967	61.7355	0.614968	0.00285345	0.136585	111.259	97.1217	0.194816	0.291192	0.808615	79.5947	95.7936	-0.268747	0.173097	0.705756	92.3975	96.6513	-0.0669111	0.760217	0.999695	Prag1	8	36094828	36147787	+	9606	protein_coding	PEAK1 related kinase activating pseudokinase 1 [Source:MGI Symbol;Acc:MGI:1196223]	-
ENSMUSG00000020738	421.481	159.309	1.40339	0.00284691	0.136585	257.094	433.108	-0.752376	0.160922	0.690243	344.293	427.565	-0.312942	0.569651	0.915771	475.264	431.505	0.139368	0.805934	0.999695	Sumo2	11	115523102	115536276	-	1736	protein_coding	small ubiquitin-like modifier 2 [Source:MGI Symbol;Acc:MGI:2158813]	-
ENSMUSG00000031328	2348.18	1877.81	0.32272	0.00286433	0.13678	2214.21	2414.85	-0.125349	0.175128	0.705788	2029.38	2382.97	-0.231615	0.0107428	0.199323	2267.23	2403.74	-0.0845169	0.255694	0.999695	Flna	X	74223461	74249820	-	9400	protein_coding	filamin, alpha [Source:MGI Symbol;Acc:MGI:95556]	-
ENSMUSG00000070695	169.74	246.864	-0.54069	0.00291864	0.138932	176.733	174.546	0.0180349	0.913563	0.984421	268.836	172.274	0.641906	0.000138571	0.00755126	182.079	173.732	0.0677763	0.65668	0.999695	Cntnap5a	1	115684756	116587323	+	10945	protein_coding	contactin associated protein-like 5A [Source:MGI Symbol;Acc:MGI:3643623]	-
ENSMUSG00000048865	58.935	34.5196	0.774094	0.00292321	0.138932	114.201	60.662	0.913135	0.00269328	0.0941617	45.7852	59.8213	-0.383105	0.166725	0.699079	71.3242	60.3395	0.24115	0.4295	0.999695	Arhgap30	1	171388954	171410298	+	8591	protein_coding	Rho GTPase activating protein 30 [Source:MGI Symbol;Acc:MGI:2684948]	-
ENSMUSG00000050174	59.2316	36.6667	0.694925	0.00293167	0.139005	61.749	60.919	0.0171243	0.932616	0.989228	40.8678	60.1046	-0.558595	0.0279016	0.34465	66.3819	60.6409	0.12874	0.522633	0.999695	Nudt6	3	37404910	37420211	-	1677	protein_coding	nudix (nucleoside diphosphate linked moiety X)-type motif 6 [Source:MGI Symbol;Acc:MGI:2387618]	-
ENSMUSG00000053175	176.979	77.7465	1.18736	0.00294019	0.139081	224.844	182.165	0.303222	0.250434	0.77373	96.8789	179.613	-0.88971	NA	1	186.302	181.224	0.0392674	0.916718	0.999695	Bcl3	7	19808462	19822770	-	2475	protein_coding	B cell leukemia/lymphoma 3 [Source:MGI Symbol;Acc:MGI:88140]	-
ENSMUSG00000035551	3.90567	15.1033	-1.9538	0.00294758	0.139104	7.46728	4.02568	0.891819	0.136588	0.661029	8.49357	3.96434	1.10656	0.159201	0.688108	5.75378	4.00162	0.52306	0.448381	1	Igfbpl1	4	45809468	45826923	-	3250	protein_coding	insulin-like growth factor binding protein-like 1 [Source:MGI Symbol;Acc:MGI:1933198]	-
ENSMUSG00000031137	467.526	564.928	-0.273063	0.00296243	0.139477	488.24	480.964	0.0216032	0.816927	0.96996	522.216	474.485	0.137251	0.0905276	0.58499	480.924	478.631	0.00681975	0.92449	0.999695	Fgf13	X	59062145	59568071	-	4019	protein_coding	fibroblast growth factor 13 [Source:MGI Symbol;Acc:MGI:109178]	-
ENSMUSG00000062380	827.032	1210.05	-0.549143	0.00300051	0.140611	829.576	850.925	-0.0366851	0.818499	0.970367	943.567	839.309	0.16935	0.398413	0.851975	938.329	846.748	0.148197	0.235941	0.999695	Tubb3	8	123411424	123422015	+	1868	protein_coding	tubulin, beta 3 class III [Source:MGI Symbol;Acc:MGI:107813]	-
ENSMUSG00000032508	192.571	139.674	0.462794	0.00299738	0.140611	231.705	198.144	0.225561	0.159331	0.688783	174.123	195.444	-0.165293	0.429606	0.867104	207.824	197.154	0.0753171	0.564256	0.999695	Myd88	9	119335934	119341411	-	2576	protein_coding	myeloid differentiation primary response gene 88 [Source:MGI Symbol;Acc:MGI:108005]	-
ENSMUSG00000048142	730.449	1052.29	-0.526874	0.00302588	0.141142	774.389	751.626	0.0432017	0.666429	0.944298	832.93	741.34	0.16783	0.0870631	0.575629	741.154	747.852	-0.0130307	0.88143	0.999695	Nat8l	5	33995984	34005916	+	6670	protein_coding	N-acetyltransferase 8-like [Source:MGI Symbol;Acc:MGI:2447776]	-
ENSMUSG00000028149	2495.98	3099.14	-0.312158	0.00302098	0.141142	2731.04	2567.32	0.0890438	0.233468	0.762124	2687.61	2533.08	0.0850802	0.175002	0.707256	2583.82	2555.12	0.0161395	0.764943	0.999695	Rap1gds1	3	138925902	139075201	-	7559	protein_coding	RAP1, GTP-GDP dissociation stimulator 1 [Source:MGI Symbol;Acc:MGI:2385189]	-
ENSMUSG00000050022	43.0613	23.1407	0.899514	0.00305651	0.142241	35.7476	44.2908	-0.311002	0.18799	0.722018	23.3226	43.7015	-0.899069	0.00281035	0.0818338	41.3716	44.0815	-0.095171	0.692206	0.999695	Amz1	5	140724127	140761439	+	6697	protein_coding	archaelysin family metallopeptidase 1 [Source:MGI Symbol;Acc:MGI:2442258]	-
ENSMUSG00000086163	7.43418	1.23821	2.57335	0.00310914	0.144356	5.09775	7.64354	-0.583384	0.332121	0.83124	3.79934	7.54558	-1.00253	0.130599	0.65663	2.77698	7.60836	-1.45523	0.0192849	1	Gm14206	11	100278706	100291286	-	747	antisense	predicted gene 14206 [Source:MGI Symbol;Acc:MGI:3649549]	-
ENSMUSG00000063253	946.198	1235.31	-0.384432	0.00311988	0.144521	1164.95	973.222	0.259234	0.00845047	0.190131	1156.7	960.264	0.268202	0.00149329	0.0505757	1052.94	968.621	0.120546	0.0513352	0.999695	Scoc	8	83430084	83458391	-	4279	protein_coding	short coiled-coil protein [Source:MGI Symbol;Acc:MGI:1927654]	-
ENSMUSG00000022456	1542.95	1889.75	-0.292588	0.00313803	0.144665	1751.91	1586.83	0.142798	0.126635	0.644422	2026.36	1565.92	0.371871	5.69228e-06	0.000516934	1559.33	1579.38	-0.0183102	0.804141	0.999695	2022-09-03	15	82274893	82294574	+	6620	protein_coding	septin 3 [Source:MGI Symbol;Acc:MGI:1345148]	-
ENSMUSG00000101111	285.882	398.151	-0.478395	0.00313765	0.144665	364.158	294.038	0.309004	0.0664633	0.519613	367.781	290.163	0.343119	0.0124449	0.219973	369.492	292.625	0.337411	0.0190116	0.999695	Gm28437	1	24613189	24613971	-	783	unprocessed_pseudogene	predicted gene 28437 [Source:MGI Symbol;Acc:MGI:5579143]	-
ENSMUSG00000034486	13.9359	4.72159	1.55258	0.00314457	0.144665	12.9213	14.3295	-0.145003	0.701082	0.952352	9.07974	14.1432	-0.626734	0.151556	0.681094	11.0957	14.2637	-0.360002	0.325575	0.999695	Gbx2	1	89927956	89931179	-	2177	protein_coding	gastrulation brain homeobox 2 [Source:MGI Symbol;Acc:MGI:95668]	Homeobox
ENSMUSG00000085067	15.2923	29.311	-0.941189	0.00316716	0.145371	24.7416	15.7318	0.651602	0.0554936	0.480506	18.3212	15.5216	0.244808	0.484474	0.886596	21.0907	15.6535	0.429714	0.222032	0.999695	Gm15631	6	105673064	105677581	-	2436	lincRNA	predicted gene 15631 [Source:MGI Symbol;Acc:MGI:3783075]	-
ENSMUSG00000020627	1631.44	1186.07	0.460318	0.0032448	0.148596	1628.5	1678.17	-0.0436223	0.578568	0.92619	1167.96	1655.68	-0.503033	1.50555e-05	0.00117245	1540.62	1670.16	-0.116742	0.158926	0.999695	Klhl29	12	5077472	5375682	-	7041	protein_coding	kelch-like 29 [Source:MGI Symbol;Acc:MGI:2683857]	-
ENSMUSG00000062591	1689.51	2268.94	-0.425514	0.00325779	0.148851	1934.21	1738.17	0.15401	0.0497173	0.462822	1872.78	1714.62	0.127278	0.137231	0.665341	1851.26	1729.69	0.0979648	0.279675	0.999695	Tubb4a	17	57080066	57087782	-	2228	protein_coding	tubulin, beta 4A class IVA [Source:MGI Symbol;Acc:MGI:107848]	-
ENSMUSG00000022443	1440.33	1146.4	0.329545	0.00328561	0.149782	1467.9	1481.87	-0.0136518	0.902617	0.982344	1199.57	1461.74	-0.284797	0.00414588	0.107497	1432.92	1474.63	-0.0415562	0.640101	0.999695	Myh9	15	77760587	77842175	-	12928	protein_coding	myosin, heavy polypeptide 9, non-muscle [Source:MGI Symbol;Acc:MGI:107717]	-
ENSMUSG00000037892	90.902	130.924	-0.52705	0.00331843	0.150936	108.705	93.4771	0.218964	0.187969	0.722018	116.265	92.2503	0.331888	0.103021	0.609276	93.6218	93.0492	0.0102996	0.948054	0.999695	Pcdh18	3	49743296	49757325	-	5366	protein_coding	protocadherin 18 [Source:MGI Symbol;Acc:MGI:1920423]	-
ENSMUSG00000027347	258.606	347.029	-0.423834	0.00333758	0.151464	388.6	265.997	0.546916	0.000339056	0.0265685	387.46	262.466	0.562426	1.33658e-08	2.22822e-06	268.278	264.72	0.0201646	0.832637	0.999695	Rasgrp1	2	117279993	117343001	-	5600	protein_coding	RAS guanyl releasing protein 1 [Source:MGI Symbol;Acc:MGI:1314635]	-
ENSMUSG00000024511	285.177	369.159	-0.371842	0.00334799	0.151595	301.892	293.269	0.0416693	0.756893	0.960666	294.333	289.396	0.0227539	0.876518	0.979087	285.105	291.926	-0.03458	0.732617	0.999695	Rab27b	18	69979131	70141605	-	10679	protein_coding	RAB27B, member RAS oncogene family [Source:MGI Symbol;Acc:MGI:1931295]	-
ENSMUSG00000056306	36.2175	58.4439	-0.687613	0.0033557	0.151602	63.2477	37.2658	0.763537	0.000955421	0.0495993	76.1833	36.7538	1.05165	7.14682e-06	0.000621028	45.7161	37.0847	0.300315	0.218283	0.999695	Sertm1	3	54897068	54915887	-	3215	protein_coding	serine rich and transmembrane domain containing 1 [Source:MGI Symbol;Acc:MGI:3607715]	-
ENSMUSG00000024843	1303.1	1085.84	0.263413	0.00338411	0.152543	1095.86	1340.36	-0.290571	2.45198e-05	0.00422887	1187.65	1322.47	-0.154876	0.0201638	0.289035	1179.81	1333.99	-0.176957	0.00291485	0.5734	Chka	19	3851773	3894369	+	12024	protein_coding	choline kinase alpha [Source:MGI Symbol;Acc:MGI:107760]	-
ENSMUSG00000030142	6.85941	0.974232	2.78408	0.00341372	0.153506	21.2356	7.05936	1.59043	0.00210975	0.0823748	2.78683	6.96164	-1.33402	0.0712458	0.536078	8.6992	7.02376	0.311151	0.567377	1	Clec4e	6	123281789	123289870	-	4965	protein_coding	C-type lectin domain family 4, member e [Source:MGI Symbol;Acc:MGI:1861232]	-
ENSMUSG00000035407	49.2688	77.5766	-0.652424	0.00342074	0.153506	65.9755	50.656	0.377336	0.106131	0.61448	54.9399	49.996	0.139774	0.607373	0.92727	43.1953	50.4301	-0.225725	0.298624	0.999695	Kank4	4	98754898	98817537	-	4795	protein_coding	KN motif and ankyrin repeat domains 4 [Source:MGI Symbol;Acc:MGI:3043381]	-
ENSMUSG00000020303	91.2014	47.2992	0.949829	0.00348457	0.156022	44.905	93.7482	-1.06372	7.03399e-06	0.00177604	46.047	92.5497	-1.01276	3.46884e-05	0.00242453	94.6232	93.3402	0.0194573	0.917517	0.999695	Stc2	11	31357307	31370074	-	5175	protein_coding	stanniocalcin 2 [Source:MGI Symbol;Acc:MGI:1316731]	-
ENSMUSG00000083962	1.16983	7.53005	-2.68383	0.00359006	0.160388	1.61131	1.20183	0.40853	0.750118	1	1.83367	1.18687	0.605592	0.671897	1	3.15612	1.19687	1.39839	0.168752	1	Gm15707	6	145315613	145316608	-	996	processed_pseudogene	predicted gene 15707 [Source:MGI Symbol;Acc:MGI:3783147]	-
ENSMUSG00000028599	109.401	65.9479	0.732099	0.00359989	0.160471	185.601	112.611	0.720547	0.00186745	0.0769236	85.4835	111.042	-0.375571	0.170675	0.703302	136.306	112.018	0.282441	0.135531	0.999695	Tnfrsf1b	4	145213463	145246870	-	3818	protein_coding	tumor necrosis factor receptor superfamily, member 1b [Source:MGI Symbol;Acc:MGI:1314883]	-
ENSMUSG00000032261	2083.84	2658.34	-0.351231	0.00361562	0.160815	2120.5	2143.19	-0.0153604	0.884924	0.97994	2484.6	2114.84	0.232202	0.0169245	0.26233	2079.98	2133.12	-0.0363034	0.554562	0.999695	Sh3bgrl2	9	83548327	83638801	+	7865	protein_coding	SH3 domain binding glutamic acid-rich protein like 2 [Source:MGI Symbol;Acc:MGI:1915350]	-
ENSMUSG00000037012	15619.4	12416.2	0.331103	0.00365606	0.161897	14329.3	16068.6	-0.165292	0.109858	0.621013	12070.9	15851.3	-0.393011	1.60054e-05	0.00123362	15649.3	15990.9	-0.0311868	0.671225	0.999695	Hk1	10	62268855	62379908	-	8532	protein_coding	hexokinase 1 [Source:MGI Symbol;Acc:MGI:96103]	-
ENSMUSG00000002997	356.255	440.111	-0.304494	0.00365501	0.161897	401.101	366.423	0.129944	0.128515	0.647639	419.537	361.552	0.212857	0.0402809	0.414523	367.107	364.684	0.00952627	0.905176	0.999695	Prkar2b	12	31958476	32061296	-	3652	protein_coding	protein kinase, cAMP dependent regulatory, type II beta [Source:MGI Symbol;Acc:MGI:97760]	-
ENSMUSG00000028755	38.3702	21.2458	0.852882	0.00377655	0.166865	38.2427	39.4448	-0.0457448	0.87652	0.979094	37.295	38.9352	-0.0569301	0.838049	0.971459	40.224	39.2752	0.0320455	0.889579	0.999695	Cda	4	138338424	138367992	-	1035	protein_coding	cytidine deaminase [Source:MGI Symbol;Acc:MGI:1919519]	-
ENSMUSG00000019232	173.227	258.095	-0.575729	0.00378813	0.16701	153.025	178.099	-0.218684	0.439466	0.876617	161.982	175.782	-0.121209	0.543439	0.906074	209.342	177.32	0.23976	0.080877	0.999695	Etnppl	3	130617448	130637521	+	8262	protein_coding	ethanolamine phosphate phospholyase [Source:MGI Symbol;Acc:MGI:1919010]	-
ENSMUSG00000000204	12.3079	3.75874	1.71163	0.00385609	0.169634	22.8862	12.6812	0.84935	0.0978625	0.596212	6.90909	12.4938	-0.870937	0.127009	0.651871	20.1115	12.6064	0.674689	0.264626	0.999695	Slfn4	11	83175186	83190216	+	3964	protein_coding	schlafen 4 [Source:MGI Symbol;Acc:MGI:1329010]	-
ENSMUSG00000029314	60.6265	37.0457	0.711191	0.00386708	0.169746	49.2497	62.389	-0.341863	0.105455	0.614074	47.1923	61.5344	-0.382972	0.123971	0.645342	55.7924	62.0711	-0.154515	0.461361	0.999695	Gpat3	5	100845713	100899102	+	3502	protein_coding	glycerol-3-phosphate acyltransferase 3 [Source:MGI Symbol;Acc:MGI:3603816]	-
ENSMUSG00000021273	843.929	1046.54	-0.310714	0.00398225	0.174421	824.306	868.032	-0.0746832	0.400208	0.861981	927.494	856.444	0.114579	0.182944	0.715838	866.58	863.939	0.0045574	0.952236	0.999695	Fdft1	14	63145150	63179578	-	4227	protein_coding	farnesyl diphosphate farnesyl transferase 1 [Source:MGI Symbol;Acc:MGI:102706]	-
ENSMUSG00000052180	6.62215	1.02894	2.71661	0.00399706	0.174689	3.1593	6.80953	-1.11466	0.0791957	0.55756	2.03492	6.72	-1.74727	0.0185921	0.278229	4.51863	6.77913	-0.581401	0.304972	1	Serpinb6c	13	33879816	33905708	-	1391	protein_coding	serine (or cysteine) peptidase inhibitor, clade B, member 6c [Source:MGI Symbol;Acc:MGI:2145481]	-
ENSMUSG00000092274	723.821	456.442	0.665183	0.00403768	0.1757	750.589	744.632	0.0114776	0.956483	0.991735	444.79	734.522	-0.723594	1.76366e-05	0.00134552	779.296	741.068	0.0722765	0.57999	0.999695	Neat1	19	5824708	5845478	-	20771	lincRNA	nuclear paraspeckle assembly transcript 1 (non-protein coding) [Source:MGI Symbol;Acc:MGI:1914211]	-
ENSMUSG00000001175	11803.3	14075.7	-0.253987	0.00403269	0.1757	12971.5	12142.9	0.0952128	0.205794	0.736793	12899.2	11979	0.106656	0.162016	0.69256	11944.3	12083.8	-0.0167397	0.722965	0.999695	Calm1	12	100199435	100209814	+	4706	protein_coding	calmodulin 1 [Source:MGI Symbol;Acc:MGI:88251]	-
ENSMUSG00000037679	835.832	657.889	0.345039	0.00406532	0.176521	824.099	859.874	-0.061214	0.483594	0.895874	724.087	848.271	-0.227564	0.0104932	0.195744	804.471	855.692	-0.0897741	0.184732	0.999695	Inf2	12	112588784	112615557	+	4871	protein_coding	inverted formin, FH2 and WH2 domain containing [Source:MGI Symbol;Acc:MGI:1917685]	-
ENSMUSG00000049409	1.74719	8.26878	-2.23667	0.00411532	0.178307	3.56403	1.79223	0.981218	0.287791	1	6.27894	1.77223	1.81571	0.035464	0.39022	1.58463	1.78704	-0.178041	0.870257	1	Prokr1	6	87578591	87590743	-	4230	protein_coding	prokineticin receptor 1 [Source:MGI Symbol;Acc:MGI:1929676]	-
ENSMUSG00000041801	150.168	84.4166	0.829826	0.00417088	0.179939	204.177	154.608	0.401062	0.0750831	0.546943	88.0995	152.4	-0.792226	0.00133257	0.0467024	140.647	153.795	-0.129945	0.559612	0.999695	Phlda3	1	135766119	135769136	+	1559	protein_coding	pleckstrin homology like domain, family A, member 3 [Source:MGI Symbol;Acc:MGI:1351485]	-
ENSMUSG00000023832	272.192	345.283	-0.343238	0.00416502	0.179939	277.969	279.934	-0.0105283	0.922476	0.986626	274.15	276.225	-0.0119133	0.916718	0.987396	264.761	278.637	-0.0734524	0.464945	0.999695	Acat2	17	12942890	12960747	-	2544	protein_coding	acetyl-Coenzyme A acetyltransferase 2 [Source:MGI Symbol;Acc:MGI:87871]	-
ENSMUSG00000030270	152.144	207.861	-0.45108	0.00418326	0.180086	161.395	156.498	0.0452096	0.725694	0.955714	199.99	154.406	0.371959	0.0157834	0.252287	159.871	155.747	0.0382438	0.781635	0.999695	Cpne9	6	113282307	113305627	+	7874	protein_coding	copine family member IX [Source:MGI Symbol;Acc:MGI:2443052]	-
ENSMUSG00000036002	385.325	251.397	0.615518	0.00419238	0.180093	345.913	396.448	-0.196617	0.128806	0.647822	336.254	391.054	-0.216577	0.0759891	0.547969	398.818	394.501	0.0159044	0.883077	0.999695	Fam214b	4	43032414	43046220	-	4129	protein_coding	family with sequence similarity 214, member B [Source:MGI Symbol;Acc:MGI:2441854]	-
ENSMUSG00000057098	302.304	423.275	-0.485485	0.00423899	0.181707	309.367	310.799	-0.00652421	0.9655	0.994327	366.44	306.787	0.256243	0.0690018	0.528756	286.703	309.413	-0.1094	0.412003	0.999695	Ebf1	11	44617317	45008091	+	9756	protein_coding	early B cell factor 1 [Source:MGI Symbol;Acc:MGI:95275]	COE
ENSMUSG00000030562	10.3253	2.78636	1.90121	0.00425634	0.182063	6.66059	10.6181	-0.673353	0.126876	0.644957	8.22753	10.4772	-0.335008	0.54037	0.905013	9.67479	10.5709	-0.127884	0.763734	0.999695	Nox4	7	87246096	87398710	+	8471	protein_coding	NADPH oxidase 4 [Source:MGI Symbol;Acc:MGI:1354184]	-
ENSMUSG00000097924	120.664	164.302	-0.445948	0.0043079	0.183877	118.998	124.109	-0.0605149	0.680776	0.9483	160.571	122.459	0.392555	0.00722083	0.155365	121.622	123.518	-0.022156	0.873934	0.999695	A730020E08Rik	6	61172293	61180810	-	3895	bidirectional_promoter_lncRNA	RIKEN cDNA A730020E08 gene [Source:MGI Symbol;Acc:MGI:2444999]	-
ENSMUSG00000078117	12.8643	25.009	-0.958	0.00444949	0.187957	16.1747	13.2352	0.28533	0.456278	0.885466	25.8643	13.0559	0.979759	0.00505424	0.123107	12.4012	13.1706	-0.0849812	0.83993	0.999695	Gm16485	9	8971791	8975773	+	3983	protein_coding	predicted gene 16485 [Source:MGI Symbol;Acc:MGI:3642771]	-
ENSMUSG00000075318	569.999	791.908	-0.4742	0.00445024	0.187957	568.609	586.071	-0.0437343	0.770998	0.962752	722.256	578.466	0.320096	0.0123013	0.218345	593.221	583.414	0.0244276	0.844365	0.999695	Scn2a	2	65620771	65767447	+	12732	protein_coding	sodium channel, voltage-gated, type II, alpha [Source:MGI Symbol;Acc:MGI:98248]	-
ENSMUSG00000034687	119.875	199.628	-0.735148	0.00443904	0.187957	113.253	123.183	-0.122614	0.635769	0.940707	168.578	121.647	0.469076	0.0650207	0.513819	115.952	122.675	-0.0817386	0.723843	0.999695	Fras1	5	96373955	96784728	+	17709	protein_coding	Fraser extracellular matrix complex subunit 1 [Source:MGI Symbol;Acc:MGI:2385368]	-
ENSMUSG00000028780	126.219	51.6738	1.28816	0.0044158	0.187957	62.7043	129.638	-1.04796	0.00493098	0.136466	71.8306	128.047	-0.834891	0.102244	0.608966	117.199	129.155	-0.140329	0.749296	0.999695	Sema3c	5	17574281	17730268	+	7140	protein_coding	sema domain, immunoglobulin domain (Ig), short basic domain, secreted, (semaphorin) 3C [Source:MGI Symbol;Acc:MGI:107557]	-
ENSMUSG00000031298	45.182	24.2781	0.890059	0.00443824	0.187957	32.9267	46.4477	-0.495694	0.0968049	0.595293	48.8729	45.8494	0.0914413	0.714933	0.950955	43.2956	46.244	-0.0928011	0.748037	0.999695	Adgrg2	X	160390690	160498070	+	5278	protein_coding	adhesion G protein-coupled receptor G2 [Source:MGI Symbol;Acc:MGI:2446854]	-
ENSMUSG00000050640	1811.83	1568.26	0.208191	0.0044931	0.189369	1654.36	1863.53	-0.17194	0.0200864	0.300942	1582.83	1838.76	-0.215577	0.0329176	0.377033	1783.52	1854.74	-0.0567189	0.38893	0.999695	Tmem150c	5	100077872	100159808	-	5555	protein_coding	transmembrane protein 150C [Source:MGI Symbol;Acc:MGI:3041258]	-
ENSMUSG00000051048	23.6354	9.36573	1.34184	0.00451653	0.189562	30.4427	24.3076	0.32406	0.280243	0.800535	40.0378	23.9834	0.743129	0.0304623	0.360644	28.1082	24.1973	0.219359	0.472879	0.999695	P4ha3	7	100285520	100319699	+	3135	protein_coding	procollagen-proline, 2-oxoglutarate 4-dioxygenase (proline 4-hydroxylase), alpha polypeptide III [Source:MGI Symbol;Acc:MGI:2444049]	-
ENSMUSG00000019772	105.713	162.432	-0.619693	0.00451288	0.189562	148.517	108.801	0.447853	0.00666673	0.165672	126.398	107.285	0.234619	0.22426	0.757652	122.636	108.247	0.178992	0.278143	0.999695	Vip	10	5639218	5647617	+	3402	protein_coding	vasoactive intestinal polypeptide [Source:MGI Symbol;Acc:MGI:98933]	-
ENSMUSG00000054855	167.908	110.151	0.60756	0.00456142	0.191047	121.628	172.837	-0.505884	0.00544685	0.145072	118.986	170.419	-0.520319	0.00304647	0.0861897	152.539	171.929	-0.172173	0.27114	0.999695	Rnd1	15	98663421	98677461	-	2967	protein_coding	Rho family GTPase 1 [Source:MGI Symbol;Acc:MGI:2444878]	-
ENSMUSG00000047842	3060.4	3800.42	-0.312379	0.00460759	0.19258	3402.73	3147.9	0.112315	0.199143	0.73078	3669.56	3105.96	0.240338	0.000426785	0.0190058	2963.81	3132.88	-0.0799823	0.0809848	0.999695	Diras2	13	52504380	52531279	-	4786	protein_coding	DIRAS family, GTP-binding RAS-like 2 [Source:MGI Symbol;Acc:MGI:1915453]	-
ENSMUSG00000026177	55.7818	32.8168	0.766013	0.00465126	0.194002	95.4196	57.3959	0.733246	0.00998781	0.20695	66.0926	56.6089	0.226823	0.50315	0.894675	63.7848	57.1152	0.158623	0.526438	0.999695	Slc11a1	1	74375195	74386062	+	3705	protein_coding	solute carrier family 11 (proton-coupled divalent metal ion transporters), member 1 [Source:MGI Symbol;Acc:MGI:1345275]	-
ENSMUSG00000054814	510.448	647.325	-0.342283	0.00469624	0.195068	548.73	524.996	0.0637448	0.51832	0.908262	557.714	518.022	0.105146	0.287591	0.802328	517.394	522.537	-0.0138515	0.86093	0.999695	Usp46	5	73998453	74068431	-	7841	protein_coding	ubiquitin specific peptidase 46 [Source:MGI Symbol;Acc:MGI:1916977]	-
ENSMUSG00000036766	1541.94	1818.91	-0.238335	0.00469157	0.195068	1461.24	1585.95	-0.11838	0.0972949	0.595293	1561.71	1564.84	-0.00261411	0.967179	0.993984	1509.08	1578.47	-0.0648504	0.195401	0.999695	Dner	1	84369839	84696221	-	4784	protein_coding	delta/notch-like EGF repeat containing [Source:MGI Symbol;Acc:MGI:2152889]	-
ENSMUSG00000075334	27.1799	58.5049	-1.10574	0.00478191	0.198217	27.928	27.9938	-0.00656835	0.983452	0.997597	36.7335	27.5849	0.415343	0.282274	0.798834	24.2649	27.839	-0.199052	0.558188	0.999695	Rprm	2	54084093	54085552	-	1460	protein_coding	reprimo, TP53 dependent G2 arrest mediator candidate [Source:MGI Symbol;Acc:MGI:1915124]	-
ENSMUSG00000043099	28.4621	14.9278	0.927169	0.00481867	0.19933	32.3412	29.2883	0.142773	0.640454	0.940707	21.6588	28.8875	-0.409631	0.178574	0.710319	29.8775	29.1394	0.0352029	0.897381	0.999695	Hic1	11	75164565	75169519	-	3750	protein_coding	hypermethylated in cancer 1 [Source:MGI Symbol;Acc:MGI:1338010]	ZBTB
ENSMUSG00000009292	130.328	173.974	-0.418345	0.00484941	0.20003	175.242	134.09	0.387956	0.00800911	0.185087	156.334	132.277	0.244524	0.11836	0.636202	130.303	133.421	-0.0317666	0.806704	0.999695	Trpm2	10	77907722	77970563	-	12459	protein_coding	transient receptor potential cation channel, subfamily M, member 2 [Source:MGI Symbol;Acc:MGI:1351901]	-
ENSMUSG00000039756	935.1	784.255	0.253696	0.00485548	0.20003	1025.15	962.019	0.091506	0.223082	0.754127	894.606	949.041	-0.0850543	0.322716	0.820971	939.699	957.306	-0.0270257	0.749809	0.999695	Dnttip2	3	122274388	122285271	+	3309	protein_coding	deoxynucleotidyltransferase, terminal, interacting protein 2 [Source:MGI Symbol;Acc:MGI:1923173]	-
ENSMUSG00000044716	118.05	73.7795	0.676174	0.004873	0.200105	101.421	121.449	-0.259996	0.148336	0.674569	93.6695	119.8	-0.352898	0.0346088	0.386362	120.032	120.865	-0.010047	0.944498	0.999695	Dok7	5	35056766	35087839	+	4275	protein_coding	docking protein 7 [Source:MGI Symbol;Acc:MGI:3584043]	-
ENSMUSG00000021390	51.3635	15.0311	1.7769	0.00487721	0.200105	58.7087	52.7394	0.154434	0.843851	0.975426	28.1575	52.1082	-0.892236	0.250716	0.779619	54.4742	52.562	0.0507576	0.899192	0.999695	Ogn	13	49608046	49624501	+	2566	protein_coding	osteoglycin [Source:MGI Symbol;Acc:MGI:109278]	-
ENSMUSG00000023439	11168.8	7403.09	0.593273	0.00489272	0.200332	11963.7	11496.7	0.057433	0.721208	0.955714	7234.87	11335.2	-0.647749	0.0169895	0.262975	11578.8	11436.8	0.0177799	0.907741	0.999695	Gnb3	6	124834240	124840275	-	2632	protein_coding	guanine nucleotide binding protein (G protein), beta 3 [Source:MGI Symbol;Acc:MGI:95785]	-
ENSMUSG00000020658	1445.9	1715.79	-0.246794	0.00497384	0.202968	1485.24	1487.19	-0.00189281	0.982147	0.997562	1711.57	1467.41	0.221778	0.00860686	0.174033	1469.18	1480.12	-0.0105421	0.878191	0.999695	Efr3b	12	3962554	4038915	-	10382	protein_coding	EFR3 homolog B [Source:MGI Symbol;Acc:MGI:2444851]	-
ENSMUSG00000066058	37.7729	14.9665	1.34071	0.00499747	0.202968	38.1791	38.8394	-0.0237414	0.946646	0.990595	19.3791	38.3302	-0.984213	0.0214979	0.298251	36.6562	38.6667	-0.0764158	0.744315	0.999695	Cldn19	4	119255414	119262438	+	4263	protein_coding	claudin 19 [Source:MGI Symbol;Acc:MGI:3033992]	-
ENSMUSG00000024151	827.13	982.776	-0.248468	0.00499095	0.202968	889.464	850.843	0.0642068	0.293425	0.809675	892.679	839.455	0.0886764	0.198445	0.732284	911.276	846.732	0.106215	0.057703	0.999695	Msh2	17	87672330	87723713	+	5518	protein_coding	mutS homolog 2 [Source:MGI Symbol;Acc:MGI:101816]	-
ENSMUSG00000073155	301.35	232.082	0.37556	0.0049864	0.202968	320.562	310.042	0.0486934	0.67911	0.947403	277.337	305.837	-0.140408	0.309618	0.815354	307.966	308.517	-0.00263496	0.977971	0.999695	1810058I24Rik	6	35252654	35263496	+	2784	lincRNA	RIKEN cDNA 1810058I24 gene [Source:MGI Symbol;Acc:MGI:1914955]	-
ENSMUSG00000021700	1424.77	1866.24	-0.389331	0.00501236	0.202996	1320.76	1465.19	-0.149798	0.310445	0.821215	1632.78	1445.92	0.174891	0.156681	0.686386	1371.25	1458.43	-0.088759	0.269797	0.999695	Rab3c	13	110054187	110280996	-	12049	protein_coding	RAB3C, member RAS oncogene family [Source:MGI Symbol;Acc:MGI:1914545]	-
ENSMUSG00000034472	352.846	281.559	0.324258	0.00502845	0.202996	312.35	362.94	-0.21635	0.158912	0.688783	374.33	358.094	0.0639771	0.463387	0.87897	313.924	361.207	-0.201423	0.0928407	0.999695	Rasd2	8	75213944	75224113	+	3176	protein_coding	RASD family, member 2 [Source:MGI Symbol;Acc:MGI:1922391]	-
ENSMUSG00000005983	55.7312	35.7323	0.639187	0.00502591	0.202996	54.6215	57.3211	-0.0697371	0.733999	0.956911	57.0013	56.5633	0.0112868	0.955702	0.993021	67.6802	57.048	0.248893	0.171164	0.999695	1700037C18Rik	16	3895179	3908689	-	3227	protein_coding	RIKEN cDNA 1700037C18 gene [Source:MGI Symbol;Acc:MGI:1920511]	-
ENSMUSG00000046731	80.8701	55.5922	0.540684	0.00508143	0.20443	75.0514	83.2242	-0.14808	0.377572	0.853742	62.8921	82.0794	-0.381343	0.0405791	0.415601	72.1626	82.797	-0.197535	0.211021	0.999695	Kctd11	11	69878261	69881406	-	3146	protein_coding	potassium channel tetramerisation domain containing 11 [Source:MGI Symbol;Acc:MGI:2448712]	-
ENSMUSG00000021226	51.0527	29.9419	0.773403	0.00508686	0.20443	47.1467	52.5592	-0.157913	0.518459	0.908262	37.9433	51.8154	-0.444113	0.149267	0.677754	43.86	52.2799	-0.253433	0.259367	0.999695	Acot2	12	83987861	83993873	+	2196	protein_coding	acyl-CoA thioesterase 2 [Source:MGI Symbol;Acc:MGI:2159605]	-
ENSMUSG00000079598	219.672	343.338	-0.64474	0.00509868	0.20443	288.024	226.041	0.349823	0.00994473	0.206697	257.248	222.941	0.208112	0.150411	0.678339	219.637	224.915	-0.0335052	0.811105	0.999695	Clec2l	6	38663069	38680864	+	1428	protein_coding	C-type lectin domain family 2, member L [Source:MGI Symbol;Acc:MGI:2141402]	-
ENSMUSG00000050910	348.56	264.735	0.39555	0.00510465	0.20443	308.601	358.59	-0.216284	0.159503	0.688875	330.143	353.74	-0.0990374	0.36264	0.840554	319.463	356.846	-0.159536	0.103306	0.999695	Cdr2l	11	115381916	115396132	+	3700	protein_coding	cerebellar degeneration-related protein 2-like [Source:MGI Symbol;Acc:MGI:2684867]	-
ENSMUSG00000026585	1915.81	2358.88	-0.300013	0.00521104	0.208065	2004.19	1970.89	0.0239901	0.699554	0.952042	2051.45	1944.34	0.076808	0.278084	0.79666	1939.68	1961.32	-0.0160061	0.745585	0.999695	Kifap3	1	163779583	163917109	+	4012	protein_coding	kinesin-associated protein 3 [Source:MGI Symbol;Acc:MGI:107566]	-
ENSMUSG00000048126	16.2462	6.51892	1.31726	0.0052161	0.208065	18.1225	16.7058	0.121576	0.749905	0.959629	20.9673	16.4876	0.345912	0.315345	0.817939	11.5463	16.6301	-0.529139	0.162683	0.999695	Col6a3	1	90765923	90843971	-	11963	protein_coding	collagen, type VI, alpha 3 [Source:MGI Symbol;Acc:MGI:88461]	-
ENSMUSG00000037868	17.4308	6.11219	1.52536	0.00524126	0.208654	17.9943	17.9414	-0.00180965	0.996548	0.999578	3.631	17.689	-2.26516	0.000245865	0.0121513	15.4547	17.8497	-0.212853	0.55799	0.999695	Egr2	10	67535475	67542188	+	3398	protein_coding	early growth response 2 [Source:MGI Symbol;Acc:MGI:95296]	zf-C2H2
ENSMUSG00000021585	229.623	177.327	0.373369	0.00525364	0.208734	207.091	236.157	-0.190232	0.12375	0.639289	201.482	233.04	-0.209822	0.121476	0.641771	226.811	235.044	-0.0512913	0.679289	0.999695	Cast	13	74692368	74808810	-	11470	protein_coding	calpastatin [Source:MGI Symbol;Acc:MGI:1098236]	-
ENSMUSG00000019866	82.1745	55.3935	0.572304	0.00528443	0.209543	79.5705	84.5046	-0.0867115	0.64437	0.94103	63.0908	83.3894	-0.402161	0.042894	0.425154	80.4191	84.1196	-0.064426	0.697999	0.999695	Crybg1	10	43950636	44148853	-	7525	protein_coding	crystallin beta-gamma domain containing 1 [Source:MGI Symbol;Acc:MGI:109544]	-
ENSMUSG00000031145	29.284	15.3168	0.933887	0.00533387	0.210739	32.1165	30.1202	0.0960573	0.754244	0.960079	20.4783	29.7232	-0.537073	0.09299	0.589992	22.6688	29.9734	-0.398287	0.20614	0.999695	Prickle3	X	7657260	7668186	+	4902	protein_coding	prickle planar cell polarity protein 3 [Source:MGI Symbol;Acc:MGI:1859635]	-
ENSMUSG00000028487	12.4415	28.4196	-1.19614	0.00533557	0.210739	13.4367	12.7863	0.0729217	0.881638	0.979705	15.2266	12.6274	0.267226	0.604658	0.926598	12.3037	12.7307	-0.0464191	0.929441	0.999695	Bnc2	4	84275095	84675275	-	8174	protein_coding	basonuclin 2 [Source:MGI Symbol;Acc:MGI:2443805]	zf-C2H2
ENSMUSG00000023960	3547.6	4230.8	-0.254061	0.00536209	0.211371	3781.71	3648.98	0.0515061	0.522085	0.909529	4076.74	3600.42	0.179026	0.0055963	0.133036	3652.18	3631.58	0.00819791	0.849728	0.999695	Enpp5	17	44078813	44086567	+	4858	protein_coding	ectonucleotide pyrophosphatase/phosphodiesterase 5 [Source:MGI Symbol;Acc:MGI:1933830]	-
ENSMUSG00000025355	22.8101	10.9704	1.05366	0.00545629	0.214664	13.2443	23.4679	-0.830498	0.0244544	0.33302	12.7447	23.1474	-0.852204	0.0283048	0.346965	22.5252	23.3549	-0.0522301	0.874917	0.999695	Mmp19	10	128790910	128800824	+	3533	protein_coding	matrix metallopeptidase 19 [Source:MGI Symbol;Acc:MGI:1927899]	-
ENSMUSG00000010095	2164.28	1708.82	0.340717	0.00549955	0.214685	2002.91	2226.85	-0.152815	0.119762	0.636698	1655.01	2196.5	-0.407959	0.000117093	0.00660478	2266.6	2215.85	0.0326486	0.677585	0.999695	Slc3a2	19	8706882	8723369	-	3529	protein_coding	solute carrier family 3 (activators of dibasic and neutral amino acid transport), member 2 [Source:MGI Symbol;Acc:MGI:96955]	-
ENSMUSG00000050822	212.814	298.627	-0.489789	0.00547357	0.214685	257.999	218.881	0.23812	0.112403	0.624443	308.946	216	0.518061	0.000382894	0.0176225	198.63	217.827	-0.131894	0.318659	0.999695	Slc29a4	5	142692512	142722490	+	2862	protein_coding	solute carrier family 29 (nucleoside transporters), member 4 [Source:MGI Symbol;Acc:MGI:2385330]	-
ENSMUSG00000037887	3368.15	2638.72	0.352061	0.0054957	0.214685	3287.76	3465.18	-0.075871	0.43621	0.875117	3074.29	3418.19	-0.152861	0.0519054	0.46625	3360.52	3448.32	-0.0372724	0.590445	0.999695	Dusp8	7	142079490	142095843	-	4870	protein_coding	dual specificity phosphatase 8 [Source:MGI Symbol;Acc:MGI:106626]	-
ENSMUSG00000037411	60.9507	31.9382	0.934572	0.00548964	0.214685	129.145	62.6659	1.04317	0.0442269	0.441126	57.887	61.8442	-0.0957017	0.809315	0.968019	74.5796	62.4014	0.255963	0.356507	0.999695	Serpine1	5	137061504	137072268	-	3876	protein_coding	serine (or cysteine) peptidase inhibitor, clade E, member 1 [Source:MGI Symbol;Acc:MGI:97608]	-
ENSMUSG00000073424	15.5367	3.5332	2.14167	0.00552838	0.215393	26.452	15.9607	0.727646	0.224811	0.755459	12.062	15.7662	-0.391495	0.497462	0.891765	25.434	15.8989	0.676478	0.115971	0.999695	Cyp4f15	17	32685627	32703352	+	2282	protein_coding	cytochrome P450, family 4, subfamily f, polypeptide 15 [Source:MGI Symbol;Acc:MGI:2146921]	-
ENSMUSG00000050747	44.7995	27.1398	0.718399	0.00554154	0.215488	32.8013	46.0856	-0.486618	0.0403226	0.42457	37.4304	45.4704	-0.285334	0.277365	0.796224	46.2784	45.8579	0.0119291	0.953657	0.999695	Trim15	17	36860691	36867210	-	1961	protein_coding	tripartite motif-containing 15 [Source:MGI Symbol;Acc:MGI:1916347]	-
ENSMUSG00000049313	1659.9	2208.84	-0.412073	0.00568967	0.220424	1897.98	1707.2	0.152803	0.144875	0.671268	2159.29	1684.61	0.358003	4.64151e-05	0.0030634	1759.07	1699.14	0.0499716	0.517222	0.999695	Sorl1	9	41964720	42124297	-	11321	protein_coding	sortilin-related receptor, LDLR class A repeats-containing [Source:MGI Symbol;Acc:MGI:1202296]	-
ENSMUSG00000027465	1201.93	1024.55	0.230131	0.00569041	0.220424	1188.87	1236.38	-0.0565891	0.365253	0.848035	1244.47	1219.79	0.0284912	0.664466	0.941828	1240.1	1230.47	0.0112995	0.867734	0.999695	Tbc1d20	2	152293828	152313996	+	4171	protein_coding	TBC1 domain family, member 20 [Source:MGI Symbol;Acc:MGI:1914481]	-
ENSMUSG00000027834	831.545	1059.34	-0.34919	0.00570753	0.220662	934.548	855.299	0.128105	0.142031	0.668756	1008.01	843.92	0.255882	0.00358773	0.0965855	844.623	851.245	-0.01103	0.876378	0.999695	Serpini1	3	75557547	75643495	+	7286	protein_coding	serine (or cysteine) peptidase inhibitor, clade I, member 1 [Source:MGI Symbol;Acc:MGI:1194506]	-
ENSMUSG00000006711	28.8476	49.0786	-0.767278	0.00575044	0.221894	19.9533	29.6716	-0.574033	0.0953994	0.592739	44.9709	29.2819	0.622303	0.0215023	0.298251	18.7646	29.5246	-0.65018	0.0274903	0.999695	D130043K22Rik	13	24845135	24901270	+	5276	protein_coding	RIKEN cDNA D130043K22 gene [Source:MGI Symbol;Acc:MGI:3036268]	-
ENSMUSG00000037492	528.124	656.057	-0.312923	0.00576189	0.22191	563.672	543.133	0.0533896	0.6151	0.936501	638.403	535.978	0.251358	0.0144421	0.240556	524.302	540.598	-0.0438327	0.586603	0.999695	Zmat4	8	23636019	24156585	+	8310	protein_coding	zinc finger, matrin type 4 [Source:MGI Symbol;Acc:MGI:2443497]	-
ENSMUSG00000117255	49.2691	27.345	0.846687	0.00581935	0.223694	36.4648	50.6981	-0.473639	0.0848168	0.568746	35.125	50.003	-0.503923	0.0546989	0.478583	41.3094	50.4438	-0.289049	0.159965	0.999695	AC140278.1	17	28799494	28801623	-	2130	bidirectional_promoter_lncRNA	novel transcript	-
ENSMUSG00000049176	147.216	199.677	-0.439425	0.00586211	0.22448	143.818	151.386	-0.0749109	0.663562	0.943215	179.117	149.402	0.262369	0.0959737	0.594878	146.594	150.69	-0.0391338	0.761232	0.999695	Frmpd4	X	167471309	168577231	-	9394	protein_coding	FERM and PDZ domain containing 4 [Source:MGI Symbol;Acc:MGI:3042378]	-
ENSMUSG00000026824	166.517	217.86	-0.38736	0.00585558	0.22448	184.206	171.284	0.10342	0.47853	0.893985	194.719	168.993	0.200735	0.197831	0.731132	184.339	170.468	0.111648	0.318397	0.999695	Kcnj3	2	55435970	55598145	+	5215	protein_coding	potassium inwardly-rectifying channel, subfamily J, member 3 [Source:MGI Symbol;Acc:MGI:104742]	-
ENSMUSG00000018143	154.701	111.09	0.479204	0.00591614	0.226118	132.757	159.196	-0.262202	0.0800817	0.558986	125.697	157.005	-0.322153	0.0384108	0.406429	150.208	158.396	-0.0755551	0.6117	0.999695	Mafk	5	139791513	139802653	+	3901	protein_coding	v-maf musculoaponeurotic fibrosarcoma oncogene family, protein K (avian) [Source:MGI Symbol;Acc:MGI:99951]	TF_bZIP
ENSMUSG00000051444	756.709	638.839	0.244232	0.00594756	0.226887	794.134	778.454	0.0287057	0.666222	0.944298	644.312	767.968	-0.253198	0.00257219	0.0770835	756.704	774.688	-0.0343899	0.655799	0.999695	Bbs12	3	37312554	37321453	+	2436	protein_coding	Bardet-Biedl syndrome 12 (human) [Source:MGI Symbol;Acc:MGI:2686651]	-
ENSMUSG00000017639	1204.61	1520.38	-0.336013	0.00596385	0.227078	1244.56	1239.22	0.00621335	0.941183	0.99028	1267.08	1222.52	0.0515503	0.573331	0.917083	1249.51	1233.23	0.0187125	0.766177	0.999695	Rab11fip4	11	79591212	79698023	+	7451	protein_coding	RAB11 family interacting protein 4 (class II) [Source:MGI Symbol;Acc:MGI:2442920]	-
ENSMUSG00000039197	254.033	332.395	-0.387671	0.00598166	0.227326	282.739	261.343	0.114912	0.232404	0.761739	294.912	257.822	0.193156	0.0893177	0.58182	281.674	260.062	0.116202	0.19866	0.999695	Adk	14	21052574	21448569	+	8526	protein_coding	adenosine kinase [Source:MGI Symbol;Acc:MGI:87930]	-
ENSMUSG00000063446	39.0921	61.2983	-0.651352	0.00600969	0.227888	51.3605	40.2202	0.353971	0.0761546	0.549257	56.3785	39.6747	0.503164	0.0212123	0.295973	40.6256	40.0228	0.0188743	0.938273	0.999695	Plppr1	4	49059273	49340259	+	7270	protein_coding	phospholipid phosphatase related 1 [Source:MGI Symbol;Acc:MGI:2445015]	-
ENSMUSG00000015647	754.311	595.438	0.341681	0.00601913	0.227888	681.02	775.704	-0.187997	0.142575	0.669562	684.325	765.494	-0.161312	0.0969656	0.597402	720.196	772.143	-0.10073	0.18182	0.999695	Lama5	2	180176373	180225859	-	11388	protein_coding	laminin, alpha 5 [Source:MGI Symbol;Acc:MGI:105382]	-
ENSMUSG00000031870	32.4308	53.5535	-0.723856	0.0060467	0.228502	39.2189	33.3426	0.232295	0.420431	0.869654	51.1051	32.9071	0.632804	0.0403276	0.414716	28.1378	33.1993	-0.239211	0.395304	0.999695	Pgr	9	8899833	8968611	+	8546	protein_coding	progesterone receptor [Source:MGI Symbol;Acc:MGI:97567]	ESR-like
ENSMUSG00000025588	13.4008	26.8086	-1.00028	0.00609758	0.229992	29.6068	13.781	1.10087	0.0516888	0.469991	19.852	13.5983	0.536182	0.149108	0.677754	26.005	13.7191	0.917719	0.00976291	0.999695	Nat1	8	67480921	67492104	+	1442	protein_coding	N-acetyl transferase 1 [Source:MGI Symbol;Acc:MGI:97279]	-
ENSMUSG00000034648	214.885	278.699	-0.375089	0.00626755	0.235519	219.089	220.991	-0.0126338	0.928581	0.987728	260.17	218.077	0.252155	0.0418907	0.421236	192.112	219.966	-0.195071	0.100324	0.999695	Lrrn1	6	107529768	107570214	+	3700	protein_coding	leucine rich repeat protein 1, neuronal [Source:MGI Symbol;Acc:MGI:106038]	-
ENSMUSG00000031351	60.3757	36.6741	0.721735	0.00625976	0.235519	78.222	62.0835	0.332838	0.259676	0.785063	53.513	61.2708	-0.199752	0.355418	0.838627	53.238	61.7997	-0.216779	0.257463	0.999695	Zfp185	X	72987339	73031543	+	3707	protein_coding	zinc finger protein 185 [Source:MGI Symbol;Acc:MGI:108095]	-
ENSMUSG00000026639	29.1587	15.7984	0.884135	0.00628165	0.235609	17.4649	29.9927	-0.779337	0.0207776	0.304786	17.4113	29.595	-0.764434	0.0179433	0.272879	29.6836	29.8458	-0.00660963	0.978859	0.999695	Lamb3	1	193207699	193343878	+	6612	protein_coding	laminin, beta 3 [Source:MGI Symbol;Acc:MGI:99915]	-
ENSMUSG00000060969	2.79719	12.544	-2.18263	0.00632302	0.236719	6.10634	2.87755	1.1013	0.107664	0.617522	3.2014	2.84035	0.193189	0.82312	0.969303	4.71101	2.86209	0.73865	0.32132	1	Irx1	13	71957921	71963723	-	2620	protein_coding	Iroquois homeobox 1 [Source:MGI Symbol;Acc:MGI:1197515]	Homeobox
ENSMUSG00000029838	1063.77	869.18	0.29128	0.00638966	0.238769	1098.21	1094.55	0.00507682	0.970477	0.995206	941.978	1079.65	-0.196532	0.0213227	0.296885	1021.51	1089.08	-0.0923932	0.288488	0.999695	Ptn	6	36714929	36810220	-	3433	protein_coding	pleiotrophin [Source:MGI Symbol;Acc:MGI:97804]	-
ENSMUSG00000050963	84.468	118.307	-0.486648	0.00645994	0.240947	89.3478	86.8625	0.0394204	0.804214	0.968199	112.147	85.7223	0.386969	0.0167703	0.260968	74.1167	86.4614	-0.223686	0.181674	0.999695	Kcns2	15	34837355	34843407	+	5586	protein_coding	K+ voltage-gated channel, subfamily S, 2 [Source:MGI Symbol;Acc:MGI:1197011]	-
ENSMUSG00000026100	5.25451	15.0091	-1.51206	0.00649422	0.241777	4.13857	5.40535	-0.389154	0.583843	0.927943	7.58782	5.33406	0.499455	0.458987	0.877527	5.16401	5.37769	-0.0622697	0.925076	1	Mstn	1	53061640	53068079	+	2705	protein_coding	myostatin [Source:MGI Symbol;Acc:MGI:95691]	-
ENSMUSG00000007097	1184.47	552.829	1.09945	0.00661561	0.245841	1347.37	1217.31	0.146434	0.727846	0.955714	768.313	1201.95	-0.645625	0.0641841	0.510614	1434.32	1212.26	0.242656	0.426998	0.999695	Atp1a2	1	172271709	172298064	-	7038	protein_coding	ATPase, Na+/K+ transporting, alpha 2 polypeptide [Source:MGI Symbol;Acc:MGI:88106]	-
ENSMUSG00000040537	1274.5	1648.28	-0.370822	0.00669334	0.248271	1360.59	1310.73	0.0537341	0.635047	0.940665	1508.43	1293.44	0.221515	0.0172568	0.266198	1300.2	1304.63	-0.00469582	0.949224	0.999695	Adam22	5	8072352	8368160	-	14348	protein_coding	a disintegrin and metallopeptidase domain 22 [Source:MGI Symbol;Acc:MGI:1340046]	-
ENSMUSG00000025892	1119.5	1338.93	-0.258303	0.00673946	0.248945	1341.37	1151.45	0.220249	0.00951781	0.203755	1404.38	1136.16	0.30542	2.05897e-05	0.00152935	1184.78	1146	0.048402	0.392208	0.999695	Gria4	9	4417896	4796234	-	6305	protein_coding	glutamate receptor, ionotropic, AMPA4 (alpha 4) [Source:MGI Symbol;Acc:MGI:95811]	-
ENSMUSG00000021567	31.8753	12.041	1.40592	0.00674507	0.248945	37.5338	32.7561	0.195711	0.598876	0.931745	24.128	32.3382	-0.424311	0.259463	0.784682	34.6769	32.6291	0.0854346	0.784582	0.999695	Nkd2	13	73818534	73847631	-	4826	protein_coding	naked cuticle 2 [Source:MGI Symbol;Acc:MGI:1919543]	-
ENSMUSG00000117310	31.0421	12.5895	1.30422	0.00674865	0.248945	27.2933	31.9167	-0.223222	0.470692	0.891241	27.8779	31.5024	-0.169129	0.614877	0.929174	22.9001	31.7745	-0.471289	0.107806	0.999695	Ptp4a1	1	30940302	30949770	-	4145	protein_coding	protein tyrosine phosphatase 4a1 [Source:NCBI gene;Acc:19243]	-
ENSMUSG00000102753	20.0592	38.7067	-0.948472	0.00688024	0.253334	27.6524	20.6435	0.426529	0.155253	0.683435	28.8792	20.3626	0.503471	0.113714	0.628049	28.3616	20.5345	0.469469	0.0929225	0.999695	Gm37056	3	73041975	73043839	-	1865	TEC	predicted gene, 37056 [Source:MGI Symbol;Acc:MGI:5610284]	-
ENSMUSG00000005667	269.63	205.718	0.39099	0.00694138	0.254652	177.541	277.49	-0.643735	0.00186409	0.0769236	116.367	273.65	-1.23212	3.99686e-12	1.21558e-09	259.236	276.075	-0.0906059	0.458568	0.999695	Mthfd2	6	83305691	83325908	-	3487	protein_coding	methylenetetrahydrofolate dehydrogenase (NAD+ dependent), methenyltetrahydrofolate cyclohydrolase [Source:MGI Symbol;Acc:MGI:1338850]	-
ENSMUSG00000030339	158.173	102.215	0.630242	0.00693333	0.254652	190.71	162.761	0.227682	0.288544	0.806369	134.933	160.516	-0.250803	0.311534	0.816422	162.825	161.957	0.00628066	0.971566	0.999695	Ltbr	6	125306571	125313885	-	2354	protein_coding	lymphotoxin B receptor [Source:MGI Symbol;Acc:MGI:104875]	-
ENSMUSG00000015981	211.633	296.181	-0.484846	0.00696258	0.254965	241.486	217.82	0.148418	0.430642	0.873315	244.957	214.785	0.189528	0.25286	0.782542	200.216	216.699	-0.113849	0.486963	0.999695	Stk32c	7	139103638	139213307	-	2302	protein_coding	serine/threonine kinase 32C [Source:MGI Symbol;Acc:MGI:2385336]	-
ENSMUSG00000045589	815.601	1037.91	-0.34739	0.00704645	0.257099	841.693	838.822	0.00474354	0.970222	0.995206	973.477	827.711	0.233028	0.0353433	0.389729	788.573	834.909	-0.082681	0.23187	0.999695	Frrs1l	4	56957173	56990391	-	6817	protein_coding	ferric-chelate reductase 1 like [Source:MGI Symbol;Acc:MGI:2442704]	-
ENSMUSG00000097789	84.0695	120.932	-0.525845	0.00704062	0.257099	91.922	86.4692	0.0900852	0.616609	0.936776	103.46	85.3203	0.280753	0.115624	0.631635	95.3659	86.0609	0.149926	0.358948	0.999695	Gm2115	7	84528954	84583531	+	7340	protein_coding	predicted gene 2115 [Source:MGI Symbol;Acc:MGI:3780284]	-
ENSMUSG00000103073	102.547	56.7139	0.858043	0.00714149	0.259625	104.708	105.526	-0.0108728	0.954052	0.991363	42.173	104.073	-1.2989	5.87682e-05	0.00375749	97.1863	104.997	-0.113147	0.598735	0.999695	Gm37904	1	166798528	166798839	-	312	processed_pseudogene	predicted gene, 37904 [Source:MGI Symbol;Acc:MGI:5611132]	-
ENSMUSG00000031343	488.154	609.391	-0.320063	0.00712991	0.259625	537.328	502.079	0.0978627	0.345831	0.837728	597.427	495.428	0.269179	0.00705782	0.153769	488.191	499.695	-0.0330229	0.702832	0.999695	Gabra3	X	72432681	72656848	-	3924	protein_coding	gamma-aminobutyric acid (GABA) A receptor, subunit alpha 3 [Source:MGI Symbol;Acc:MGI:95615]	-
ENSMUSG00000031397	10.943	3.81499	1.53388	0.00717888	0.260513	5.8828	11.2483	-0.934825	0.0771549	0.551308	7.42571	11.1051	-0.599808	0.244618	0.772908	8.35372	11.1997	-0.42595	0.356909	1	Tktl1	X	74177259	74208500	+	2473	protein_coding	transketolase-like 1 [Source:MGI Symbol;Acc:MGI:1933244]	-
ENSMUSG00000030108	135.333	35.1154	1.94706	0.00720841	0.261113	156.807	139.005	0.173743	0.763457	0.962018	44.7723	137.309	-1.6174	0.00923755	0.181596	177.489	138.489	0.35779	0.43892	0.999695	Slc6a13	6	121300227	121337733	+	2904	protein_coding	solute carrier family 6 (neurotransmitter transporter, GABA), member 13 [Source:MGI Symbol;Acc:MGI:95629]	-
ENSMUSG00000031861	40.4826	23.1068	0.805774	0.00723561	0.261627	37.9255	41.6407	-0.134659	0.595628	0.930333	42.8254	41.0823	0.057535	0.823587	0.969303	40.3598	41.4425	-0.0401373	0.856251	0.999695	Lpar2	8	69822429	69831102	+	5837	protein_coding	lysophosphatidic acid receptor 2 [Source:MGI Symbol;Acc:MGI:1858422]	-
ENSMUSG00000034584	10.9806	3.72302	1.55057	0.00729296	0.263227	5.29406	11.2937	-1.0914	0.0640525	0.512922	9.55923	11.1431	-0.226164	0.638379	0.933679	6.14778	11.2419	-0.870103	0.0711761	1	Exph5	9	53301670	53377514	+	10519	protein_coding	exophilin 5 [Source:MGI Symbol;Acc:MGI:2443248]	-
ENSMUSG00000003752	144.803	112.731	0.361207	0.00730723	0.26327	125.823	148.963	-0.242792	0.0929194	0.589712	144.227	146.961	-0.0294765	0.829373	0.970611	129.851	148.238	-0.189812	0.0977876	0.999695	Itpkc	7	27207172	27228661	-	5285	protein_coding	inositol 1,4,5-trisphosphate 3-kinase C [Source:MGI Symbol;Acc:MGI:2442554]	-
ENSMUSG00000114414	165.988	118.025	0.491147	0.00740412	0.265808	138.465	170.684	-0.301205	0.0616918	0.503681	104.127	168.442	-0.692047	9.0694e-05	0.00532939	146.093	169.92	-0.218575	0.125238	0.999695	A930014D07Rik	13	99007099	99021695	+	974	lincRNA	RIKEN cDNA A930014D07 gene [Source:MGI Symbol;Acc:MGI:1925197]	-
ENSMUSG00000073152	21.94	7.83882	1.49111	0.00740254	0.265808	25.0065	22.5831	0.144837	0.752426	0.959809	9.00743	22.2621	-1.29836	0.0350004	0.388106	16.9476	22.4695	-0.407017	0.377512	0.999695	Gm10475	5	21910931	21954014	+	1796	antisense	predicted gene 10475 [Source:MGI Symbol;Acc:MGI:3642283]	-
ENSMUSG00000021453	207.758	125.392	0.727321	0.00745085	0.267009	214.254	213.878	0.00268355	0.990637	0.998935	150.236	210.859	-0.488215	0.0182426	0.275919	235.56	212.747	0.146873	0.416707	0.999695	Gadd45g	13	51846678	51848468	+	1173	protein_coding	growth arrest and DNA-damage-inducible 45 gamma [Source:MGI Symbol;Acc:MGI:1346325]	-
ENSMUSG00000022636	235.246	309.247	-0.394411	0.0074795	0.267559	264.258	241.958	0.127197	0.332242	0.83124	319.63	238.756	0.419139	0.00375153	0.09971	247.74	240.803	0.0419886	0.680696	0.999695	Alcam	16	52248996	52454074	-	7121	protein_coding	activated leukocyte cell adhesion molecule [Source:MGI Symbol;Acc:MGI:1313266]	-
ENSMUSG00000043079	199.416	141.631	0.494708	0.00753146	0.268939	227.64	205.153	0.148383	0.293076	0.809675	183.478	202.369	-0.139848	0.473605	0.883032	210.286	204.166	0.0413615	0.747664	0.999695	Synpo	18	60593973	60660142	-	9533	protein_coding	synaptopodin [Source:MGI Symbol;Acc:MGI:1099446]	-
ENSMUSG00000022752	1737.18	2129.03	-0.293295	0.00755551	0.269319	1808.33	1786.77	0.0172656	0.803518	0.968199	1866.97	1763	0.0824912	0.181679	0.714224	1852.62	1778.33	0.0591369	0.240558	0.999695	Tomm70a	16	57121703	57156705	+	9777	protein_coding	translocase of outer mitochondrial membrane 70A [Source:MGI Symbol;Acc:MGI:106295]	-
ENSMUSG00000017677	1644.34	1357.78	0.276214	0.00761489	0.270955	1657.98	1691.47	-0.0291571	0.756326	0.960657	1723.23	1668.77	0.0462063	0.58013	0.919174	1698.83	1683.36	0.0130054	0.860887	0.999695	Wsb1	11	79239372	79254671	-	3987	protein_coding	WD repeat and SOCS box-containing 1 [Source:MGI Symbol;Acc:MGI:1926139]	-
ENSMUSG00000036062	770.575	970.886	-0.333577	0.00766347	0.272202	879.185	792.403	0.149942	0.0985146	0.597927	1013.64	782.026	0.374635	0.000154059	0.00823577	743.191	788.749	-0.085756	0.35582	0.999695	Phf24	4	42916660	42944752	+	7118	protein_coding	PHD finger protein 24 [Source:MGI Symbol;Acc:MGI:2140712]	-
ENSMUSG00000085238	4.77148	13.9383	-1.56063	0.00767848	0.272254	9.09599	4.90505	0.897493	0.167573	0.698717	13.6039	4.84375	1.50445	0.00923877	0.181596	7.96226	4.88179	0.71374	0.244139	1	4930479D17Rik	6	146657218	146665403	+	740	lincRNA	RIKEN cDNA 4930479D17 gene [Source:MGI Symbol;Acc:MGI:1922175]	-
ENSMUSG00000036136	22.2927	8.1943	1.43714	0.00785993	0.278197	9.99918	22.9294	-1.19457	0.0150011	0.260887	10.8718	22.6252	-1.05156	0.0361151	0.394426	11.0819	22.8227	-1.03977	0.0345394	0.999695	Fam110c	12	31073861	31080251	+	3088	protein_coding	family with sequence similarity 110, member C [Source:MGI Symbol;Acc:MGI:1918813]	-
ENSMUSG00000079317	280.026	347.786	-0.312813	0.00787718	0.278318	301.106	288.079	0.0638753	0.576053	0.924984	316.57	284.195	0.156648	0.103592	0.609276	320.213	286.676	0.160159	0.0716059	0.999695	Trappc2	X	166440574	166453140	+	3643	protein_coding	trafficking protein particle complex 2 [Source:MGI Symbol;Acc:MGI:1913476]	-
ENSMUSG00000024044	2256.5	2580.45	-0.193368	0.00791302	0.279093	2300.42	2320.9	-0.0128864	0.888182	0.980572	2569.62	2290.04	0.165901	0.00231883	0.0714049	2289.67	2309.94	-0.0126253	0.818568	0.999695	Epb41l3	17	69075683	69289989	+	11919	protein_coding	erythrocyte membrane protein band 4.1 like 3 [Source:MGI Symbol;Acc:MGI:103008]	-
ENSMUSG00000114051	9.55224	2.41372	1.95485	0.00794789	0.279833	5.43826	9.8274	-0.846544	0.08505	0.569749	6.15989	9.69355	-0.671424	0.293948	0.806484	4.36341	9.78066	-1.16739	0.0224981	1	Gm48008	12	86078644	86079754	+	667	processed_transcript	predicted gene, 48008 [Source:MGI Symbol;Acc:MGI:6097313]	-
ENSMUSG00000000078	601.7	430.255	0.484644	0.00805752	0.283196	481.612	618.921	-0.362478	0.00039904	0.029444	432.972	610.632	-0.495749	0.000306284	0.0145734	559.014	615.985	-0.139858	0.0864793	0.999695	Klf6	13	5861482	5870394	+	4391	protein_coding	Kruppel-like factor 6 [Source:MGI Symbol;Acc:MGI:1346318]	zf-C2H2
ENSMUSG00000073406	9.09449	2.51825	1.8613	0.00818999	0.28735	2.94936	9.34586	-1.67003	0.00857748	0.191933	3.26552	9.22766	-1.51033	0.0280293	0.345734	4.7737	9.30854	-0.971802	0.0782309	1	H2-Bl	17	36080115	36084223	-	1682	polymorphic_pseudogene	histocompatibility 2, blastocyst [Source:MGI Symbol;Acc:MGI:892004]	-
ENSMUSG00000103477	15.7468	29.9664	-0.923076	0.00821984	0.287895	24.3808	16.2033	0.585951	0.0910435	0.584355	28.3803	15.9813	0.829093	0.0133924	0.229558	25.1734	16.1215	0.638583	0.0358525	0.999695	5930409G06Rik	3	45273424	45274967	-	1544	TEC	RIKEN cDNA 5930409G06 gene [Source:MGI Symbol;Acc:MGI:1924316]	-
ENSMUSG00000004040	2981.82	2001.98	0.574888	0.0082408	0.288127	3473.23	3067.37	0.179177	0.198417	0.729861	2449.03	3026.05	-0.305126	0.249525	0.778364	3260.19	3052.68	0.0948268	0.361815	0.999695	Stat3	11	100885098	100939540	-	9527	protein_coding	signal transducer and activator of transcription 3 [Source:MGI Symbol;Acc:MGI:103038]	STAT
ENSMUSG00000107770	23.1422	8.6955	1.42328	0.00830367	0.289821	26.189	23.7926	0.13792	0.690955	0.950494	33.9723	23.4819	0.531694	0.119874	0.637947	17.7353	23.6911	-0.417536	0.418385	0.999695	Gm44126	6	76284416	76284929	+	514	processed_pseudogene	predicted gene, 44126 [Source:MGI Symbol;Acc:MGI:5690518]	-
ENSMUSG00000022048	1373.18	1685.08	-0.295343	0.00832004	0.289889	1609.78	1412.95	0.188256	0.180021	0.712955	1515.44	1393.64	0.120908	0.278962	0.797414	1496.17	1405.89	0.0899684	0.3449	0.999695	Dpysl2	14	66802864	66868688	-	4520	protein_coding	dihydropyrimidinase-like 2 [Source:MGI Symbol;Acc:MGI:1349763]	-
ENSMUSG00000024227	3554.13	4658.43	-0.390357	0.00834781	0.289931	3448.29	3654.21	-0.083738	0.529554	0.913316	4066.37	3606.63	0.172942	0.250737	0.779619	3659.1	3638.05	0.00828119	0.9476	0.999695	Pdzph1	17	58878808	58991375	-	4434	protein_coding	PDZ and pleckstrin homology domains 1 [Source:MGI Symbol;Acc:MGI:1916489]	-
ENSMUSG00000041986	1438.25	1724.71	-0.262038	0.00835008	0.289931	1473.76	1479.54	-0.00558817	0.954756	0.991363	1431.42	1459.73	-0.0282126	0.7044	0.948661	1427.46	1472.33	-0.0442811	0.497215	0.999695	Elmod1	9	53911457	53975301	-	4434	protein_coding	ELMO/CED-12 domain containing 1 [Source:MGI Symbol;Acc:MGI:3583900]	-
ENSMUSG00000107608	37.6306	21.357	0.812844	0.00837921	0.290441	26.3044	38.7262	-0.558944	0.0335685	0.387676	27.1186	38.1891	-0.489755	0.0954073	0.593688	22.8534	38.532	-0.751724	0.0110292	0.999695	Gm43863	6	117916531	117917722	-	1192	TEC	predicted gene, 43863 [Source:MGI Symbol;Acc:MGI:5690255]	-
ENSMUSG00000015745	330.817	228.222	0.534841	0.00843199	0.290807	365.755	340.412	0.103758	0.550395	0.917639	288.625	335.736	-0.216453	0.214336	0.748912	364.732	338.72	0.106811	0.382587	0.999695	Plekho1	3	95988429	95996001	-	2172	protein_coding	pleckstrin homology domain containing, family O member 1 [Source:MGI Symbol;Acc:MGI:1914470]	-
ENSMUSG00000042622	46.6747	24.1211	0.955728	0.0084225	0.290807	44.2769	48.0446	-0.120319	0.766278	0.962152	42.9801	47.3635	-0.138944	0.703958	0.948661	40.0455	47.8018	-0.258068	0.413829	0.999695	Maff	15	79346621	79359076	+	2594	protein_coding	v-maf musculoaponeurotic fibrosarcoma oncogene family, protein F (avian) [Source:MGI Symbol;Acc:MGI:96910]	TF_bZIP
ENSMUSG00000038760	15.8037	30.8603	-0.961106	0.00843318	0.290807	17.3356	16.2561	0.0893201	0.784091	0.96412	16.3865	16.0379	0.0313203	0.932053	0.990452	18.2293	16.1801	0.170576	0.60049	0.999695	Trhr	15	44196135	44235912	+	4000	protein_coding	thyrotropin releasing hormone receptor [Source:MGI Symbol;Acc:MGI:98824]	-
ENSMUSG00000025572	95.6449	67.7457	0.497787	0.00854321	0.294097	99.6214	98.3861	0.0184292	0.935394	0.989228	69.9332	97.0598	-0.472534	0.00788707	0.164054	88.3699	97.92	-0.148822	0.344171	0.999695	Tmc6	11	117765988	117782198	-	4091	protein_coding	transmembrane channel-like gene family 6 [Source:MGI Symbol;Acc:MGI:1098686]	-
ENSMUSG00000040489	55.2282	32.7245	0.751749	0.00856105	0.294207	44.0063	56.8282	-0.366842	0.122111	0.638976	36.4967	56.0629	-0.611193	0.0427689	0.424595	48.0897	56.5318	-0.232781	0.372134	0.999695	Sox30	11	45980310	46017994	+	2997	protein_coding	SRY (sex determining region Y)-box 30 [Source:MGI Symbol;Acc:MGI:1341157]	HMG
ENSMUSG00000005950	53.3738	35.0486	0.606115	0.00858898	0.294664	38.3037	54.93	-0.517465	0.0333315	0.386858	43.2021	54.1725	-0.321536	0.159836	0.689616	46.8351	54.6459	-0.221409	0.351297	0.999695	P2rx5	11	73160421	73172685	+	2395	protein_coding	purinergic receptor P2X, ligand-gated ion channel, 5 [Source:MGI Symbol;Acc:MGI:2137026]	-
ENSMUSG00000016763	76.2732	36.3827	1.07327	0.00861695	0.29512	85.8834	78.4581	0.12899	0.587229	0.927943	41.2215	77.4043	-0.909531	0.000248604	0.0122431	75.7877	78.0856	-0.0460525	0.852342	0.999695	Scube1	15	83604999	83725021	-	9829	protein_coding	signal peptide, CUB domain, EGF-like 1 [Source:MGI Symbol;Acc:MGI:1890616]	-
ENSMUSG00000036390	323.506	230.184	0.490841	0.00864862	0.2957	266.849	332.92	-0.31924	0.0604219	0.49771	243.634	328.311	-0.429967	0.0185775	0.278229	331.046	331.247	-0.00111314	0.993971	0.999695	Gadd45a	6	67035096	67037457	-	1764	protein_coding	growth arrest and DNA-damage-inducible 45 alpha [Source:MGI Symbol;Acc:MGI:107799]	-
ENSMUSG00000015568	210.689	260.472	-0.305385	0.00868532	0.296451	230.843	216.737	0.0905776	0.34289	0.836709	203.444	213.824	-0.0746698	0.549406	0.909527	195.35	215.689	-0.142474	0.149683	0.999695	Lpl	8	68880491	68907448	+	10478	protein_coding	lipoprotein lipase [Source:MGI Symbol;Acc:MGI:96820]	-
ENSMUSG00000079834	1063.36	1319.48	-0.311355	0.00873137	0.297518	949.392	1094.04	-0.204914	0.128778	0.647822	1059.38	1079.15	-0.0275113	0.852677	0.975516	925.836	1088.69	-0.233753	0.0550244	0.999695	Tmlhe	GL456233.1	159647	334183	+	2251	protein_coding	trimethyllysine hydroxylase, epsilon [Source:NCBI gene;Acc:192289]	-
ENSMUSG00000042417	15.44	5.86184	1.40935	0.0087808	0.298191	22.1334	15.8872	0.479504	0.204256	0.736042	8.58657	15.6691	-0.858684	0.0717043	0.537926	13.2402	15.8104	-0.254799	0.540591	0.999695	Ccno	13	112987802	112990777	+	2555	protein_coding	cyclin O [Source:MGI Symbol;Acc:MGI:2145534]	-
ENSMUSG00000066441	686.014	804.98	-0.230719	0.00877599	0.298191	701.279	705.657	-0.00896739	0.895457	0.980959	737.624	696.215	0.0820425	0.384683	0.848224	692.334	702.278	-0.0208183	0.747194	0.999695	Rdh11	12	79174337	79192293	-	3455	protein_coding	retinol dehydrogenase 11 [Source:MGI Symbol;Acc:MGI:102581]	-
ENSMUSG00000029484	91.0781	57.7194	0.657626	0.00882598	0.29922	104.507	93.7535	0.156601	0.464641	0.888277	69.65	92.4371	-0.405196	0.157022	0.686386	89.6757	93.2663	-0.0577532	0.782459	0.999695	Anxa3	5	96793339	96845966	+	3643	protein_coding	annexin A3 [Source:MGI Symbol;Acc:MGI:1201378]	-
ENSMUSG00000026796	719.638	564.806	0.34935	0.0088412	0.299231	705.041	740.446	-0.0706489	0.591493	0.928686	588.265	730.329	-0.311888	0.00707837	0.15377	734.42	736.799	-0.00454639	0.968613	0.999695	Fam129b	2	32876114	32925254	+	4672	protein_coding	family with sequence similarity 129, member B [Source:MGI Symbol;Acc:MGI:2442910]	-
ENSMUSG00000026360	343.134	438.142	-0.352794	0.00901939	0.304749	420.503	353.135	0.252399	0.0425537	0.435154	392.808	348.256	0.17323	0.145197	0.67447	405.738	351.328	0.20761	0.0872686	0.999695	Rgs2	1	143999338	144004161	-	3627	protein_coding	regulator of G-protein signaling 2 [Source:MGI Symbol;Acc:MGI:1098271]	-
ENSMUSG00000024587	2664.26	2289.79	0.218473	0.00908664	0.305993	1972.59	2741.03	-0.474538	1.28356e-08	9.37549e-06	1904.51	2703.94	-0.505461	2.22665e-11	5.8271e-09	2670.97	2727.59	-0.0302194	0.659179	0.999695	Nars	18	64499665	64516557	-	2632	protein_coding	asparaginyl-tRNA synthetase [Source:MGI Symbol;Acc:MGI:1917473]	-
ENSMUSG00000027022	19.8107	6.863	1.5363	0.00907878	0.305993	7.25461	20.3787	-1.4872	0.000137609	0.0144327	14.2261	20.1063	-0.509849	0.196813	0.72949	17.359	20.2803	-0.219038	0.464131	0.999695	Xirp2	2	67446002	67526614	+	11979	protein_coding	xin actin-binding repeat containing 2 [Source:MGI Symbol;Acc:MGI:2685198]	-
ENSMUSG00000021099	761.562	914.982	-0.264391	0.00916709	0.308186	938.476	783.427	0.260439	0.00282914	0.0973753	906.001	772.902	0.228497	0.00352906	0.0956257	834.114	779.638	0.0972809	0.154897	0.999695	Six6	12	72939892	72944899	+	4009	protein_coding	sine oculis-related homeobox 6 [Source:MGI Symbol;Acc:MGI:1341840]	Homeobox
ENSMUSG00000026043	77.702	41.9181	0.89268	0.00925787	0.310718	140.228	79.9459	0.811041	0.00993906	0.206697	58.4401	78.8541	-0.43108	0.125567	0.648167	78.8942	79.5527	-0.0134545	0.960499	0.999695	Col3a1	1	45311538	45349706	+	9816	protein_coding	collagen, type III, alpha 1 [Source:MGI Symbol;Acc:MGI:88453]	-
ENSMUSG00000028706	731.833	603.906	0.277716	0.00927344	0.310722	796.777	752.742	0.0816323	0.445568	0.880071	689.634	742.676	-0.106267	0.402874	0.854422	742.595	749.205	-0.0130951	0.868445	0.999695	Nsun4	4	116032842	116053876	-	5993	protein_coding	NOL1/NOP2/Sun domain family, member 4 [Source:MGI Symbol;Acc:MGI:1919431]	-
ENSMUSG00000025582	1025.84	1357	-0.403872	0.00932835	0.312042	1123.06	1055.17	0.0899565	0.340133	0.834865	1300.7	1041.13	0.32089	5.60105e-05	0.00361195	1064.07	1050.13	0.0193586	0.814874	0.999695	Nptx1	11	119538719	119547753	-	5217	protein_coding	neuronal pentraxin 1 [Source:MGI Symbol;Acc:MGI:107811]	-
ENSMUSG00000093675	3.10704	10.1075	-1.69352	0.00951779	0.317323	2.11829	3.19874	-0.585213	0.521311	1	9.04149	3.15343	1.52331	0.0166665	0.260123	1.9799	3.18185	-0.687288	0.463796	1	Gm20618	6	6603219	6691521	-	1455	lincRNA	predicted gene 20618 [Source:MGI Symbol;Acc:MGI:5313065]	-
ENSMUSG00000070867	19.3856	8.00019	1.27513	0.00951261	0.317323	18.8532	19.9248	-0.079358	0.834373	0.973007	17.0403	19.6724	-0.20272	0.618624	0.930149	20.6301	19.8376	0.0564769	0.87286	0.999695	Trabd2b	4	114406724	114615098	+	6617	protein_coding	TraB domain containing 2B [Source:MGI Symbol;Acc:MGI:3650152]	-
ENSMUSG00000037242	836.33	616.224	0.440985	0.00956875	0.318494	681.233	860.307	-0.337144	0.00376629	0.115658	574.038	848.771	-0.563904	2.29714e-06	0.000237153	851.276	856.17	-0.00785571	0.913033	0.999695	Clic4	4	135213969	135272814	-	6572	protein_coding	chloride intracellular channel 4 (mitochondrial) [Source:MGI Symbol;Acc:MGI:1352754]	-
ENSMUSG00000069441	9.67537	1.80461	2.44457	0.00960982	0.319332	9.79271	9.93714	-0.0239847	0.968743	0.995038	5.61661	9.8163	-0.826198	0.388207	0.849708	7.90859	9.90186	-0.327389	0.576278	1	Dsg1a	18	20310811	20343350	+	5686	protein_coding	desmoglein 1 alpha [Source:MGI Symbol;Acc:MGI:94930]	-
ENSMUSG00000019256	1738.94	1294.6	0.425995	0.00968848	0.321414	1623.02	1788.34	-0.140138	0.311836	0.821852	1285.11	1764.7	-0.457431	9.27109e-06	0.000778564	1615.46	1780.09	-0.140182	0.21023	0.999695	Ahr	12	35497974	35535038	-	6163	protein_coding	aryl-hydrocarbon receptor [Source:MGI Symbol;Acc:MGI:105043]	bHLH
ENSMUSG00000031490	40.4449	22.4927	0.845321	0.00970505	0.321434	28.4137	41.6473	-0.550385	0.0473207	0.453325	14.3227	41.0523	-1.53584	5.44553e-05	0.0035319	45.6187	41.4186	0.141738	0.615847	0.999695	Eif4ebp1	8	27260329	27276674	+	2196	protein_coding	eukaryotic translation initiation factor 4E binding protein 1 [Source:MGI Symbol;Acc:MGI:103267]	-
ENSMUSG00000028145	189.995	235.445	-0.308692	0.00975467	0.321799	220.633	195.417	0.175456	0.147276	0.672518	176.892	192.816	-0.125577	0.284592	0.800581	220.244	194.498	0.179698	0.0848429	0.999695	Them4	3	94310089	94332540	+	4025	protein_coding	thioesterase superfamily member 4 [Source:MGI Symbol;Acc:MGI:1923028]	-
ENSMUSG00000046031	8.95861	1.77491	2.34554	0.00976409	0.321799	27.9208	9.23873	1.59495	0.00298025	0.100086	6.01573	9.09442	-0.585276	0.464969	0.879774	9.44253	9.17892	0.0422688	0.942959	1	Calhm6	10	34126067	34127984	-	1094	protein_coding	calcium homeostasis modulator family member 6 [Source:MGI Symbol;Acc:MGI:2443082]	-
ENSMUSG00000059248	341.752	273.966	0.318303	0.00975053	0.321799	433.363	351.601	0.301796	0.0113417	0.223369	338.755	346.838	-0.0336129	0.774992	0.96301	348.377	349.888	-0.00615015	0.953687	0.999695	2022-09-09	11	117199661	117362325	+	7565	protein_coding	septin 9 [Source:MGI Symbol;Acc:MGI:1858222]	-
ENSMUSG00000021186	84.4647	43.6918	0.953954	0.0098005	0.32247	65.4371	86.8175	-0.407253	0.288802	0.806369	45.4376	85.7075	-0.913281	0.00401409	0.105404	79.7766	86.4488	-0.1157	0.562833	0.999695	Fbln5	12	101746565	101819055	-	6911	protein_coding	fibulin 5 [Source:MGI Symbol;Acc:MGI:1346091]	-
ENSMUSG00000094002	22.6383	38.0289	-0.75113	0.00990157	0.325263	42.7178	23.2708	0.877489	0.00355735	0.11097	24.0473	22.9724	0.0622984	0.862809	0.977663	22.146	23.171	-0.0653598	0.814711	0.999695	Gm9866	12	27050950	27160633	-	12327	lincRNA	predicted gene 9866 [Source:MGI Symbol;Acc:MGI:3643118]	-
ENSMUSG00000041959	311.311	199.988	0.639009	0.00992217	0.325408	281.037	320.283	-0.188736	0.367904	0.849923	147.674	315.924	-1.09565	4.74259e-05	0.00311186	321.876	318.736	0.0142201	0.907205	0.999695	S100a10	3	93555080	93564643	+	1212	protein_coding	S100 calcium binding protein A10 (calpactin) [Source:MGI Symbol;Acc:MGI:1339468]	-
ENSMUSG00000031760	91.2662	128.91	-0.495708	0.00997876	0.326731	132.553	93.8887	0.496923	0.0165361	0.271256	100.09	92.6137	0.110536	0.628354	0.931701	100.264	93.4444	0.100377	0.565712	0.999695	Mt3	8	94152607	94154146	+	1066	protein_coding	metallothionein 3 [Source:MGI Symbol;Acc:MGI:97173]	-
ENSMUSG00000031302	245.426	303.899	-0.308541	0.0100608	0.32844	293.347	252.504	0.217026	0.045852	0.448263	301.07	249.095	0.273403	0.0135883	0.231677	265.155	251.246	0.078541	0.471294	0.999695	Nlgn3	X	101299168	101325963	+	9271	protein_coding	neuroligin 3 [Source:MGI Symbol;Acc:MGI:2444609]	-
ENSMUSG00000055027	2.72489	9.98263	-1.86333	0.0100636	0.32844	6.40692	2.79797	1.18457	0.128842	0.647822	4.26115	2.7645	0.617832	0.471208	0.881914	3.18149	2.78792	0.184678	0.813656	1	Smyd1	6	71213940	71322233	-	4546	protein_coding	SET and MYND domain containing 1 [Source:MGI Symbol;Acc:MGI:104790]	-
ENSMUSG00000032334	130.268	93.9167	0.472056	0.01014	0.330395	157.93	134.011	0.237522	0.296335	0.811894	106.41	132.207	-0.310291	0.0349544	0.388106	146.249	133.365	0.133687	0.31034	0.999695	Loxl1	9	58287738	58313186	-	3297	protein_coding	lysyl oxidase-like 1 [Source:MGI Symbol;Acc:MGI:106096]	-
ENSMUSG00000000056	1118.8	1293.01	-0.208499	0.0102237	0.332454	1185.69	1150.88	0.0426875	0.512903	0.907597	1129.86	1135.45	-0.00791246	0.908373	0.986138	1180.07	1145.33	0.0431239	0.398771	0.999695	Narf	11	121237253	121255856	+	4806	protein_coding	nuclear prelamin A recognition factor [Source:MGI Symbol;Acc:MGI:1914858]	-
ENSMUSG00000028635	2631	992.921	1.4059	0.0102362	0.332454	2980.16	2709.58	0.137306	0.661782	0.942665	1260.7	2670.3	-1.08271	NA	1	2398.98	2694.63	-0.167708	0.625895	0.999695	Edn2	4	120161206	120167360	+	1462	protein_coding	endothelin 2 [Source:MGI Symbol;Acc:MGI:95284]	-
ENSMUSG00000020607	40.6689	59.0133	-0.536174	0.0103744	0.336397	51.9628	41.8351	0.313854	0.123068	0.638976	34.0291	41.274	-0.287955	0.325949	0.821851	44.832	41.6347	0.108791	0.597269	0.999695	Fam84a	12	14146830	14152054	-	4308	protein_coding	family with sequence similarity 84, member A [Source:MGI Symbol;Acc:MGI:2145011]	-
ENSMUSG00000086555	24.2656	40.5486	-0.742022	0.0104221	0.337402	34.6615	24.9526	0.476333	0.0639327	0.512163	32.0372	24.626	0.37707	0.184538	0.717431	25.4732	24.837	0.0390695	0.88531	0.999695	Gm13446	2	35549538	35558702	-	2120	processed_transcript	predicted gene 13446 [Source:MGI Symbol;Acc:MGI:3649869]	-
ENSMUSG00000030681	264.198	168.405	0.650816	0.0104986	0.339332	324.124	271.945	0.25277	0.246561	0.770263	198.637	268.134	-0.431709	0.0663652	0.519068	274.151	270.532	0.0185894	0.9062	0.999695	Mvp	7	126986860	127014621	-	7627	protein_coding	major vault protein [Source:MGI Symbol;Acc:MGI:1925638]	-
ENSMUSG00000059479	60.5852	40.3552	0.587952	0.0105474	0.339354	47.581	62.3457	-0.387916	0.0925919	0.588638	35.0209	61.4869	-0.812417	0.000383739	0.0176254	48.2437	62.0332	-0.363503	0.052123	0.999695	B3gnt8	7	25626654	25635100	+	6474	protein_coding	UDP-GlcNAc:betaGal beta-1,3-N-acetylglucosaminyltransferase 8 [Source:MGI Symbol;Acc:MGI:2385269]	-
ENSMUSG00000025860	7420.44	9061.9	-0.288295	0.0105348	0.339354	6952.47	7630.73	-0.134321	0.356342	0.843898	8619.44	7530.32	0.194777	0.096481	0.596112	7572.39	7595.92	-0.00451409	0.951824	0.999695	Xiap	X	42059679	42109656	+	9469	protein_coding	X-linked inhibitor of apoptosis [Source:MGI Symbol;Acc:MGI:107572]	-
ENSMUSG00000021948	239.032	184.913	0.37152	0.0105499	0.339354	311.628	245.966	0.341047	0.0257532	0.340909	220.515	242.6	-0.13606	0.407707	0.855867	248.612	244.731	0.0224881	0.880179	0.999695	Prkcd	14	30595354	30626210	-	5544	protein_coding	protein kinase C, delta [Source:MGI Symbol;Acc:MGI:97598]	-
ENSMUSG00000022469	177.748	132.095	0.429482	0.0106853	0.342979	184.397	182.831	0.0121644	0.952815	0.991363	144.761	180.379	-0.317112	0.0337412	0.381918	186.976	181.97	0.0384057	0.773522	0.999695	Rapgef3	15	97744770	97767972	-	6336	protein_coding	Rap guanine nucleotide exchange factor (GEF) 3 [Source:MGI Symbol;Acc:MGI:2441741]	-
ENSMUSG00000042428	844.036	1000.59	-0.245622	0.0106968	0.342979	878.43	868.053	0.017014	0.829309	0.972536	811.534	856.554	-0.0782836	0.36904	0.844145	921.454	864.02	0.092689	0.141436	0.999695	Mgat3	15	80173721	80215519	+	4665	protein_coding	mannoside acetylglucosaminyltransferase 3 [Source:MGI Symbol;Acc:MGI:104532]	-
ENSMUSG00000086290	271.679	195.82	0.471307	0.0107609	0.343937	381.743	279.571	0.449593	0.0301787	0.368806	242.243	275.74	-0.185749	0.244885	0.772908	285.258	278.149	0.0363236	0.766462	0.999695	Snhg12	4	132308623	132311024	+	2402	lincRNA	small nucleolar RNA host gene 12 [Source:MGI Symbol;Acc:MGI:1916721]	-
ENSMUSG00000051359	1398.7	1610.9	-0.203696	0.0107608	0.343937	1377.99	1438.71	-0.0621357	0.394949	0.861981	1491.2	1419.47	0.0706545	0.258026	0.784351	1473.6	1431.88	0.0411827	0.546633	0.999695	Ncald	15	37366175	37792570	-	8581	protein_coding	neurocalcin delta [Source:MGI Symbol;Acc:MGI:1196326]	-
ENSMUSG00000004698	1300.08	1660.02	-0.352494	0.0108256	0.345458	1275.93	1336.89	-0.0675826	0.599678	0.931894	1454.32	1319.33	0.140107	0.300541	0.810562	1272.97	1330.82	-0.0642892	0.473026	0.999695	Hdac9	12	34047580	34917095	-	14665	protein_coding	histone deacetylase 9 [Source:MGI Symbol;Acc:MGI:1931221]	-
ENSMUSG00000036972	35.4248	12.5997	1.49418	0.0108488	0.345649	48.8167	36.3766	0.423665	0.539587	0.916353	21.5584	35.9403	-0.737765	0.180523	0.712905	47.1798	36.2507	0.378474	0.320645	0.999695	Zic4	9	91362413	91389348	+	10335	protein_coding	zinc finger protein of the cerebellum 4 [Source:MGI Symbol;Acc:MGI:107201]	zf-C2H2
ENSMUSG00000019734	81.5802	56.9892	0.517884	0.0109752	0.349124	74.3878	83.9001	-0.175049	0.365988	0.848277	63.1526	82.789	-0.396176	0.0464438	0.443675	65.7885	83.511	-0.344821	0.0352805	0.999695	Tmc4	7	3665790	3677553	-	4280	protein_coding	transmembrane channel-like gene family 4 [Source:MGI Symbol;Acc:MGI:2669035]	-
ENSMUSG00000050335	77.6717	36.9865	1.06971	0.010999	0.349328	105.905	79.9655	0.404785	0.161942	0.691393	45.86	78.8373	-0.782059	0.00975879	0.188125	85.9008	79.5341	0.110003	0.662346	0.999695	Lgals3	14	47367751	47386160	+	1858	protein_coding	lectin, galactose binding, soluble 3 [Source:MGI Symbol;Acc:MGI:96778]	-
ENSMUSG00000037754	263.212	325.054	-0.304788	0.0110523	0.349915	290.187	270.835	0.0997933	0.42503	0.871093	300.662	267.146	0.171054	0.121399	0.641771	269.826	269.468	0.00228983	0.98288	0.999695	Ppp1r16b	2	158665398	158766334	+	8844	protein_coding	protein phosphatase 1, regulatory subunit 16B [Source:MGI Symbol;Acc:MGI:2151841]	-
ENSMUSG00000085555	13.0807	4.46407	1.54419	0.0110379	0.349915	10.5988	13.4518	-0.344072	0.53392	0.915393	19.1642	13.276	0.52444	0.259513	0.784682	12.8182	13.3901	-0.0612762	0.882292	0.999695	2610035F20Rik	14	122470284	122475199	-	2352	processed_transcript	RIKEN cDNA 2610035F20 gene [Source:MGI Symbol;Acc:MGI:1916498]	-
ENSMUSG00000113366	35.1886	21.6033	0.70565	0.0111141	0.351318	41.577	36.189	0.200859	0.402885	0.861981	52.626	35.7123	0.56418	0.0721307	0.539263	43.1135	36.0202	0.262073	0.302073	0.999695	Gm47259	13	30098493	30102042	+	3550	TEC	predicted gene, 47259 [Source:MGI Symbol;Acc:MGI:6096091]	-
ENSMUSG00000044499	209.617	162.044	0.369911	0.0111853	0.352461	156.353	215.56	-0.462932	6.50931e-05	0.00849316	168.206	212.723	-0.338032	0.0157589	0.252076	194.174	214.573	-0.144064	0.16744	0.999695	Hs3st5	10	36506814	36834397	+	4340	protein_coding	heparan sulfate (glucosamine) 3-O-sulfotransferase 5 [Source:MGI Symbol;Acc:MGI:2441996]	-
ENSMUSG00000022439	109.107	80.8787	0.431328	0.011173	0.352461	115.893	112.239	0.0454238	0.778032	0.963455	98.8303	110.726	-0.163296	0.380937	0.848126	99.5933	111.7	-0.166792	0.29413	0.999695	Parvg	15	84324026	84342978	+	3090	protein_coding	parvin, gamma [Source:MGI Symbol;Acc:MGI:2158329]	-
ENSMUSG00000059857	715.008	859.834	-0.266408	0.0112443	0.353385	714.222	735.443	-0.0421766	0.744889	0.958243	820.395	725.659	0.17639	0.156052	0.685959	679.294	731.941	-0.107081	0.173708	0.999695	Ntng1	3	109780040	110144011	-	8243	protein_coding	netrin G1 [Source:MGI Symbol;Acc:MGI:1934028]	-
ENSMUSG00000026869	664.987	854.406	-0.361551	0.0112498	0.353385	719.74	684.064	0.0732654	0.442806	0.878175	728.157	674.919	0.109361	0.185097	0.717924	723.973	680.732	0.0891455	0.194813	0.999695	Psmd5	2	34849734	34874968	-	7230	protein_coding	proteasome (prosome, macropain) 26S subunit, non-ATPase, 5 [Source:MGI Symbol;Acc:MGI:1914248]	-
ENSMUSG00000025140	45.3847	27.6417	0.716751	0.0112938	0.354214	24.8907	46.7204	-0.906783	0.000626423	0.0399115	15.2617	46.0634	-1.58611	2.79789e-06	0.000282374	44.2206	46.4731	-0.0695085	0.761555	0.999695	Pycr1	11	120635712	120643769	-	3935	protein_coding	pyrroline-5-carboxylate reductase 1 [Source:MGI Symbol;Acc:MGI:2384795]	-
ENSMUSG00000038146	215.22	155.606	0.467792	0.0113366	0.354449	172.406	221.347	-0.361602	0.0106691	0.216257	164.195	218.406	-0.412662	0.00365155	0.0979328	157.572	220.321	-0.483963	0.00133352	0.372331	Notch3	17	32120820	32166880	-	8044	protein_coding	notch 3 [Source:MGI Symbol;Acc:MGI:99460]	-
ENSMUSG00000061878	132.625	90.1323	0.554969	0.0113304	0.354449	101.267	136.48	-0.429263	0.00756272	0.179227	124.713	134.6	-0.107651	0.506845	0.896323	120.901	135.793	-0.167323	0.25499	0.999695	Sphk1	11	116530925	116536674	+	4774	protein_coding	sphingosine kinase 1 [Source:MGI Symbol;Acc:MGI:1316649]	-
ENSMUSG00000025608	3907.31	3299.4	0.24405	0.0114441	0.35505	3537.96	4018.32	-0.183792	0.0381255	0.41278	3131.69	3965.23	-0.340239	3.95805e-05	0.00267507	3828.97	3999.74	-0.0630512	0.335287	0.999695	Podxl	6	31519488	31563981	-	5488	protein_coding	podocalyxin-like [Source:MGI Symbol;Acc:MGI:1351317]	-
ENSMUSG00000074357	91.3817	54.3318	0.748312	0.0114171	0.35505	70.2398	94.0166	-0.423038	0.0431113	0.436933	58.1758	92.7343	-0.676993	0.00626303	0.141317	77.3383	93.5627	-0.277641	0.114855	0.999695	AA386476	8	47675391	47685239	+	2407	bidirectional_promoter_lncRNA	expressed sequence AA386476 [Source:MGI Symbol;Acc:MGI:3034595]	-
ENSMUSG00000036523	405.314	308.427	0.394193	0.0113799	0.35505	410.911	416.737	-0.0202967	0.871204	0.97848	477.147	411.334	0.214757	0.142573	0.671269	365.244	414.857	-0.183648	0.163504	0.999695	Greb1	12	16670615	16800886	-	9580	protein_coding	gene regulated by estrogen in breast cancer protein [Source:MGI Symbol;Acc:MGI:2149712]	-
ENSMUSG00000033917	1281.36	1442.78	-0.171282	0.0114075	0.35505	1394.15	1318.11	0.0810342	0.219895	0.751003	1364.53	1300.46	0.0696259	0.298856	0.809294	1325.61	1311.74	0.0154363	0.771191	0.999695	Gde1	7	118688545	118705778	-	1692	protein_coding	glycerophosphodiester phosphodiesterase 1 [Source:MGI Symbol;Acc:MGI:1891827]	-
ENSMUSG00000042377	6.68907	1.52271	2.145	0.0114376	0.35505	5.26855	6.88205	-0.379384	0.558321	0.919501	4.3506	6.78867	-0.658419	0.309406	0.815354	4.79213	6.84862	-0.517046	0.383243	1	Fam83g	11	61684091	61709951	+	6659	protein_coding	family with sequence similarity 83, member G [Source:MGI Symbol;Acc:MGI:1916890]	-
ENSMUSG00000022346	33.9522	19.6369	0.793865	0.0114875	0.355848	22.1106	34.9259	-0.663782	0.0202925	0.302187	11.8193	34.4552	-1.53645	2.27936e-05	0.00167645	24.0567	34.7585	-0.534461	0.0434081	0.999695	Myc	15	61985391	61990374	+	2717	protein_coding	myelocytomatosis oncogene [Source:MGI Symbol;Acc:MGI:97250]	bHLH
ENSMUSG00000054679	155.341	197.602	-0.345805	0.011513	0.355927	188.897	159.765	0.240919	0.0396216	0.420302	212.798	157.65	0.432541	0.000138289	0.00755126	168.531	159.016	0.0843697	0.434873	0.999695	Srsf12	4	33208991	33233340	+	3148	protein_coding	serine/arginine-rich splicing factor 12 [Source:MGI Symbol;Acc:MGI:2661424]	-
ENSMUSG00000041544	393.064	314.943	0.319233	0.0115255	0.355927	453.606	404.291	0.166012	0.0509101	0.466285	468.289	398.917	0.230393	0.0111097	0.203116	382.778	402.366	-0.0711736	0.363235	0.999695	Disp3	4	148240264	148287965	-	5450	protein_coding	dispatched RND transporter family member 3 [Source:MGI Symbol;Acc:MGI:2444403]	-
ENSMUSG00000029826	242.93	160.529	0.599293	0.0115958	0.35755	240.888	249.858	-0.0534413	0.730729	0.956377	172.015	246.54	-0.516607	0.00761858	0.160247	220.363	248.683	-0.174842	0.0755678	0.999695	Zc3hav1	6	38305286	38354603	-	6518	protein_coding	zinc finger CCCH type, antiviral 1 [Source:MGI Symbol;Acc:MGI:1926031]	-
ENSMUSG00000034224	17.5349	4.79575	1.87431	0.0116759	0.359403	18.6203	18.0153	0.0471078	0.933991	0.989228	4.70692	17.7871	-1.94561	0.00546965	0.130679	18.8608	17.9514	0.0724734	0.881473	0.999695	Slc38a8	8	119479602	119501698	-	3499	protein_coding	solute carrier family 38, member 8 [Source:MGI Symbol;Acc:MGI:2685433]	-
ENSMUSG00000079543	2.51106	16.4353	-2.70629	0.0116917	0.359403	1.25076	2.57728	-1.06465	0.52971	1	1.19146	2.54686	-1.0825	0.532028	1	13.005	2.57025	2.3384	0.315923	1	Igkv13-85	6	68930269	68930734	-	347	IG_V_gene	immunoglobulin kappa chain variable 13-85 [Source:MGI Symbol;Acc:MGI:4439827]	-
ENSMUSG00000099301	2.15851	8.89315	-2.04156	0.0117775	0.361487	2.32987	2.22018	0.0772822	0.939798	1	1.31613	2.19098	-0.773008	0.510897	1	1.96494	2.2091	-0.160904	0.860072	1	Mir3473e	5	31667231	31667340	-	110	miRNA	microRNA 3473e [Source:MGI Symbol;Acc:MGI:5530804]	-
ENSMUSG00000044117	578.999	714.016	-0.302824	0.0118356	0.361868	834.097	595.659	0.485748	2.51846e-08	1.71692e-05	820.464	587.631	0.48153	4.11902e-08	6.26369e-06	640.805	592.746	0.112558	0.185965	0.999695	2900011O08Rik	16	13986604	14101500	+	2395	protein_coding	RIKEN cDNA 2900011O08 gene [Source:MGI Symbol;Acc:MGI:1914504]	-
ENSMUSG00000074238	668.96	769.614	-0.202412	0.0118104	0.361868	715.361	688.207	0.0555693	0.477384	0.893836	738.995	678.927	0.121529	0.106179	0.614312	724.511	684.844	0.081146	0.193176	0.999695	Ap1ar	3	127807007	127837523	-	8763	protein_coding	adaptor-related protein complex 1 associated regulatory protein [Source:MGI Symbol;Acc:MGI:2384822]	-
ENSMUSG00000020412	728.772	612.102	0.25127	0.0118439	0.361868	697.159	749.74	-0.104687	0.167899	0.699222	719.005	739.628	-0.0400269	0.612264	0.928262	717.863	746.073	-0.055711	0.411135	0.999695	Ascc2	11	4637747	4685699	+	4964	protein_coding	activating signal cointegrator 1 complex subunit 2 [Source:MGI Symbol;Acc:MGI:1922702]	-
ENSMUSG00000056718	66.2811	42.4052	0.640445	0.0119253	0.363803	49.1241	68.2014	-0.475064	0.0139403	0.250755	55.2431	67.2688	-0.283145	0.239159	0.767724	60.4991	67.8586	-0.167342	0.432676	0.999695	Gm13199	2	5862080	5862934	-	759	protein_coding	predicted gene 13199 [Source:MGI Symbol;Acc:MGI:3649231]	-
ENSMUSG00000100153	211.085	288.048	-0.448235	0.011993	0.365315	226.74	217.177	0.0613052	0.679946	0.947817	215.359	214.223	0.00745645	0.960881	0.993109	233.161	216.106	0.108257	0.475744	0.999695	Ppp1ccb	7	119739926	119742226	+	1466	transcribed_processed_pseudogene	protein phosphatase 1 catalytic subunit gamma B [Source:MGI Symbol;Acc:MGI:3647492]	-
ENSMUSG00000037428	1412.02	667.398	1.081	0.0120131	0.365372	1165.83	1452.82	-0.317439	0.283946	0.80255	1067.71	1432.98	-0.424007	0.00408001	0.106525	1365.52	1445.71	-0.0823141	0.527755	0.999695	Vgf	5	137026392	137033351	+	2973	protein_coding	VGF nerve growth factor inducible [Source:MGI Symbol;Acc:MGI:1343180]	-
ENSMUSG00000040785	6109.93	8130.68	-0.412205	0.0121181	0.365799	6590.93	6283.04	0.0690214	0.552309	0.917998	7522.89	6200.9	0.278777	0.0183548	0.275948	6280.57	6253.93	0.00616995	0.947035	0.999695	Ttc3	16	94370618	94469343	+	16220	protein_coding	tetratricopeptide repeat domain 3 [Source:MGI Symbol;Acc:MGI:1276539]	-
ENSMUSG00000005233	731.925	949.204	-0.375194	0.0121085	0.365799	826.685	752.56	0.135372	0.333141	0.83124	922.913	742.755	0.312403	0.033014	0.377709	759.536	749.193	0.019837	0.935569	0.999695	Spc25	2	69193895	69206194	-	3188	protein_coding	SPC25, NDC80 kinetochore complex component, homolog (S. cerevisiae) [Source:MGI Symbol;Acc:MGI:1913692]	-
ENSMUSG00000040310	7.48159	2.02294	1.89214	0.0120685	0.365799	4.46725	7.69274	-0.772923	0.187616	0.721922	2.58979	7.59308	-1.58076	0.0374666	0.402725	1.80531	7.65789	-2.09316	0.00700089	1	Alx4	2	93642384	93681339	+	7060	protein_coding	aristaless-like homeobox 4 [Source:MGI Symbol;Acc:MGI:108359]	Homeobox
ENSMUSG00000112550	42.7581	23.9454	0.839533	0.0120913	0.365799	28.2821	43.9873	-0.639842	0.069281	0.526488	27.8283	43.3996	-0.640741	0.0504046	0.460579	24.8785	43.7668	-0.816436	0.0536424	0.999695	Gm6627	10	52341272	52343657	-	2386	processed_pseudogene	predicted gene 6627 [Source:MGI Symbol;Acc:MGI:3644486]	-
ENSMUSG00000004885	32.2653	15.9762	1.01375	0.0120941	0.365799	28.3307	33.1858	-0.226147	0.540741	0.916537	22.6978	32.7425	-0.525956	0.0781076	0.551478	27.9663	33.0311	-0.239902	0.371191	0.999695	Crabp2	3	87948666	87953376	+	1322	protein_coding	cellular retinoic acid binding protein II [Source:MGI Symbol;Acc:MGI:88491]	-
ENSMUSG00000042249	537.21	660.382	-0.297349	0.012183	0.36611	602.965	552.414	0.126066	0.318586	0.825757	686.522	545.175	0.331915	0.00168726	0.0556795	577.033	549.893	0.0693332	0.437754	0.999695	Grk3	5	112910482	113015791	-	8693	protein_coding	G protein-coupled receptor kinase 3 [Source:MGI Symbol;Acc:MGI:87941]	-
ENSMUSG00000059434	1628.17	1284.11	0.342374	0.0121602	0.36611	1662.59	1675.27	-0.0106993	0.942302	0.990325	1346.37	1652.58	-0.295064	0.0260359	0.330369	1534.02	1666.78	-0.119772	0.377597	0.999695	Gckr	5	31297443	31327314	+	4335	protein_coding	glucokinase regulatory protein [Source:MGI Symbol;Acc:MGI:1096345]	-
ENSMUSG00000026204	2813.34	2085.1	0.432062	0.0121782	0.36611	2534.01	2894.66	-0.191919	0.0785246	0.555512	2471.77	2855.24	-0.207821	0.0663668	0.519068	2827.12	2880.3	-0.0268844	0.779642	0.999695	Ptprn	1	75247027	75264502	-	4249	protein_coding	protein tyrosine phosphatase, receptor type, N [Source:MGI Symbol;Acc:MGI:102765]	-
ENSMUSG00000024598	38.7985	19.4604	0.998443	0.0122491	0.367548	44.2742	39.8804	0.152074	0.625822	0.938432	32.2874	39.3752	-0.291909	0.449898	0.874408	34.3674	39.7082	-0.206683	0.505693	0.999695	Fbn2	18	58008623	58209926	-	10480	protein_coding	fibrillin 2 [Source:MGI Symbol;Acc:MGI:95490]	-
ENSMUSG00000058135	256.642	202.448	0.342628	0.0122832	0.368021	336.9	264.106	0.351474	0.0967094	0.595293	235.999	260.483	-0.140044	0.358213	0.839327	268.783	262.758	0.032725	0.779023	0.999695	Gstm1	3	108012255	108017973	-	1473	protein_coding	glutathione S-transferase, mu 1 [Source:MGI Symbol;Acc:MGI:95860]	-
ENSMUSG00000018930	7.53052	1.53145	2.31722	0.012343	0.368167	7.50012	7.76661	-0.0565795	0.927326	0.987446	2.98869	7.64436	-1.35897	0.115687	0.631635	6.07457	7.71595	-0.344685	0.645201	1	Ccl4	11	83662584	83664683	+	660	protein_coding	chemokine (C-C motif) ligand 4 [Source:MGI Symbol;Acc:MGI:98261]	-
ENSMUSG00000006585	80.7398	55.1855	0.549415	0.0123409	0.368167	79.9503	83.0896	-0.0554987	0.798509	0.967941	67.4866	81.9503	-0.278764	0.195062	0.728895	74.6158	82.6631	-0.149389	0.4708	0.999695	Cdt1	8	122568015	122573554	+	3140	protein_coding	chromatin licensing and DNA replication factor 1 [Source:MGI Symbol;Acc:MGI:1914427]	-
ENSMUSG00000087507	16.5914	6.92375	1.25256	0.0123307	0.368167	13.465	17.0747	-0.340087	0.412996	0.865954	10.6644	16.8359	-0.647069	0.212758	0.747477	8.11732	16.9914	-1.06614	0.0124391	0.999695	Gm16141	11	19013817	19015154	+	790	antisense	predicted gene 16141 [Source:MGI Symbol;Acc:MGI:3802122]	-
ENSMUSG00000039110	59.8034	39.475	0.601381	0.0124834	0.370859	57.2845	61.5257	-0.102421	0.558905	0.919501	49.2848	60.6974	-0.294946	0.182068	0.714715	50.3424	61.2224	-0.282875	0.124331	0.999695	Mycbpap	11	94501347	94521742	-	3871	protein_coding	MYCBP associated protein [Source:MGI Symbol;Acc:MGI:2388726]	-
ENSMUSG00000042581	101.713	143.902	-0.501524	0.0124782	0.370859	100.265	104.656	-0.0628375	0.777269	0.963455	118.148	103.237	0.191978	0.345581	0.83116	104.677	104.13	0.00933512	0.951023	0.999695	Thsd7b	1	129273302	130219278	+	12171	protein_coding	thrombospondin, type I, domain containing 7B [Source:MGI Symbol;Acc:MGI:2443925]	-
ENSMUSG00000023484	54.2766	81.4843	-0.587505	0.0124886	0.370859	71.7343	55.8642	0.360957	0.252942	0.776636	61.2508	55.0871	0.156587	0.707322	0.949006	75.5799	55.5744	0.444368	0.0543868	0.999695	Prph	15	99055174	99058978	+	1999	protein_coding	peripherin [Source:MGI Symbol;Acc:MGI:97774]	-
ENSMUSG00000011254	238.403	178.29	0.420688	0.0125808	0.372227	242.076	245.271	-0.0196373	0.88059	0.979535	179.031	241.945	-0.432645	0.0218677	0.299944	232.028	244.081	-0.0742251	0.52412	0.999695	Thg1l	11	45946843	45955494	-	3015	protein_coding	tRNA-histidine guanylyltransferase 1-like (S. cerevisiae) [Source:MGI Symbol;Acc:MGI:1913878]	-
ENSMUSG00000050875	826.774	690.112	0.260145	0.0126029	0.372227	988.907	850.518	0.217726	0.00771562	0.180892	923.734	839.103	0.138436	0.0536057	0.473517	844.406	846.383	-0.00341135	0.963438	0.999695	A730017C20Rik	18	59062248	59076962	+	5347	protein_coding	RIKEN cDNA A730017C20 gene [Source:MGI Symbol;Acc:MGI:2442934]	-
ENSMUSG00000035131	37.2481	56.5752	-0.603248	0.0126088	0.372227	41.435	38.3079	0.112344	0.661655	0.942665	51.9232	37.8013	0.455793	0.0590804	0.495443	33.9181	38.129	-0.168174	0.493869	0.999695	Brinp3	1	146494760	146902472	+	7003	protein_coding	bone morphogenetic protein/retinoic acid inducible neural specific 3 [Source:MGI Symbol;Acc:MGI:2443035]	-
ENSMUSG00000063234	38.7618	24.0732	0.686951	0.0125888	0.372227	39.3607	39.8757	-0.0189665	0.942916	0.990422	30.391	39.3421	-0.372223	0.143911	0.67225	42.2433	39.6799	0.0904899	0.671244	0.999695	Gpr84	15	103308235	103310612	-	1725	protein_coding	G protein-coupled receptor 84 [Source:MGI Symbol;Acc:MGI:1934129]	-
ENSMUSG00000024975	923.895	1098.7	-0.24971	0.0126915	0.374121	1023.17	950.504	0.106176	0.237921	0.763818	935.565	937.644	-0.0040906	0.96802	0.993984	981.607	945.844	0.0534108	0.486717	0.999695	Pdcd4	19	53892231	53929861	+	2556	protein_coding	programmed cell death 4 [Source:MGI Symbol;Acc:MGI:107490]	-
ENSMUSG00000087168	1910.65	1221.06	0.64616	0.0127421	0.374231	1671.55	1964.3	-0.232973	0.263607	0.789314	1195.45	1938.97	-0.697431	1.61586e-06	0.000170735	1778.4	1955.59	-0.137107	0.396443	0.999695	Gm15983	16	5254786	5289621	+	4814	antisense	predicted gene 15983 [Source:MGI Symbol;Acc:MGI:3805549]	-
ENSMUSG00000115318	23.5768	11.7878	1.00207	0.0127719	0.374231	11.2838	24.2365	-1.10831	0.0118699	0.231203	10.1371	23.9227	-1.23583	0.00516883	0.124951	12.5359	24.1355	-0.9499	0.00699951	0.872489	Gm49089	15	33831448	33834353	+	2906	TEC	predicted gene, 49089 [Source:MGI Symbol;Acc:MGI:6118479]	-
ENSMUSG00000041498	92.0731	64.1714	0.525346	0.0127883	0.374231	105.718	94.7042	0.15667	0.343429	0.836716	71.9704	93.4383	-0.376209	0.0665917	0.519544	93.4554	94.26	-0.0148089	0.933491	0.999695	Kif14	1	136466343	136531511	+	10358	protein_coding	kinesin family member 14 [Source:MGI Symbol;Acc:MGI:1098226]	-
ENSMUSG00000037096	28.2674	43.8301	-0.631357	0.0127402	0.374231	37.1106	29.0679	0.350428	0.145024	0.671268	39.1097	28.6866	0.444754	0.0781899	0.551643	41.7301	28.9343	0.527168	0.0190186	0.999695	Gm9762	3	78966356	78966799	-	444	processed_pseudogene	predicted pseudogene 9762 [Source:MGI Symbol;Acc:MGI:3704220]	-
ENSMUSG00000036770	6.19635	1.25152	2.3109	0.0127704	0.374231	2.95288	6.37699	-1.11694	0.108926	0.619166	3.88195	6.28921	-0.683838	0.336781	0.827335	2.18372	6.34434	-1.54557	0.0291943	1	Stpg3	2	25212207	25214637	-	1945	protein_coding	sperm tail PG rich repeat containing 3 [Source:MGI Symbol;Acc:MGI:1921722]	-
ENSMUSG00000032191	31.6847	16.5481	0.929191	0.0129035	0.376506	22.5527	32.6224	-0.527608	0.117904	0.634205	13.6253	32.1632	-1.23603	0.00102381	0.0380941	22.0355	32.4424	-0.559128	0.0505035	0.999695	Bcl2l10	9	75347758	75351632	+	1220	protein_coding	Bcl2-like 10 [Source:MGI Symbol;Acc:MGI:1330841]	-
ENSMUSG00000106350	11.0283	3.49366	1.65265	0.0128982	0.376506	7.87062	11.3476	-0.525406	0.284411	0.803332	4.55667	11.1952	-1.30689	0.0230971	0.311271	7.73684	11.2886	-0.541923	0.226867	1	Gm4869	5	140445645	140495071	+	2955	protein_coding	predicted gene 4869 [Source:MGI Symbol;Acc:MGI:3646257]	-
ENSMUSG00000026167	35.4936	19.5988	0.850241	0.0129541	0.376751	31.183	36.5434	-0.226809	0.456501	0.885466	13.6394	36.0306	-1.39801	0.000139894	0.00759993	34.41	36.3417	-0.076148	0.762322	0.999695	Wnt10a	1	74791516	74804179	+	2468	protein_coding	wingless-type MMTV integration site family, member 10A [Source:MGI Symbol;Acc:MGI:108071]	-
ENSMUSG00000115025	10.5616	3.78911	1.48551	0.0129681	0.376751	6.96222	10.8714	-0.64872	0.268211	0.790981	4.99682	10.72	-1.10431	0.0355976	0.390429	3.17416	10.8142	-1.76978	0.00207368	1	Gm4240	14	70302207	70302939	+	571	processed_pseudogene	predicted gene 4240 [Source:MGI Symbol;Acc:MGI:3782417]	-
ENSMUSG00000062456	218.467	162.31	0.428253	0.0129432	0.376751	249.351	224.745	0.149884	0.379706	0.854994	201.925	221.728	-0.134171	0.405273	0.855057	232.95	223.653	0.059305	0.778716	0.999695	Rpl9-ps6	19	32465885	32466575	-	691	protein_coding	ribosomal protein L9, pseudogene 6 [Source:MGI Symbol;Acc:MGI:3642682]	-
ENSMUSG00000074623	11.3061	4.21907	1.41566	0.0130854	0.379609	5.50006	11.6256	-1.08186	0.0237344	0.32666	4.35372	11.4746	-1.37702	0.0187815	0.279571	3.32066	11.5719	-1.7903	0.00141291	1	Gm826	2	160311393	160334162	-	1493	protein_coding	predicted gene 826 [Source:MGI Symbol;Acc:MGI:2685672]	-
ENSMUSG00000003436	7.62807	16.2241	-1.09139	0.0131811	0.381833	10.1392	7.84008	0.375179	0.416356	0.8678	8.50727	7.74182	0.133094	0.795985	0.966081	9.78479	7.80592	0.322045	0.521309	1	Dll3	7	28293553	28302238	-	2850	protein_coding	delta like canonical Notch ligand 3 [Source:MGI Symbol;Acc:MGI:1096877]	-
ENSMUSG00000082229	505.255	627.645	-0.313155	0.0134382	0.388722	469.846	519.808	-0.146195	0.189455	0.722629	517.997	512.764	0.0143688	0.885398	0.981247	540.606	517.274	0.0632372	0.493669	0.999695	Nap1l2	X	103184176	103186640	-	2465	protein_coding	nucleosome assembly protein 1-like 2 [Source:MGI Symbol;Acc:MGI:106654]	-
ENSMUSG00000021974	400.307	495.727	-0.307743	0.0135082	0.390184	441.116	411.834	0.0993212	0.26225	0.787944	423.223	406.271	0.0585411	0.537962	0.90394	378.348	409.815	-0.11579	0.140341	0.999695	Fgf9	14	58070547	58112720	+	4649	protein_coding	fibroblast growth factor 9 [Source:MGI Symbol;Acc:MGI:104723]	-
ENSMUSG00000106707	31.4948	18.4624	0.767176	0.0135834	0.391234	26.519	32.415	-0.289228	0.347165	0.839146	18.4807	31.9691	-0.79268	0.0138958	0.234614	26.9297	32.2446	-0.259426	0.404068	0.999695	Gm43748	6	34859705	34860937	+	1233	TEC	predicted gene 43748 [Source:MGI Symbol;Acc:MGI:5663885]	-
ENSMUSG00000027950	922.999	1068.76	-0.211948	0.0135662	0.391234	984.19	949.362	0.0519287	0.40131	0.861981	1044.71	936.712	0.157393	0.0338102	0.382048	923.469	944.878	-0.0332184	0.544043	0.999695	Chrnb2	3	89746195	89764632	-	8380	protein_coding	cholinergic receptor, nicotinic, beta polypeptide 2 (neuronal) [Source:MGI Symbol;Acc:MGI:87891]	-
ENSMUSG00000049521	266.462	191.066	0.479282	0.0136348	0.391592	289.613	274.234	0.0782661	0.586528	0.927943	211.285	270.44	-0.354543	0.0338527	0.382091	247.159	272.827	-0.142348	0.257161	0.999695	Cdc42ep1	15	78842624	78850897	+	2560	protein_coding	CDC42 effector protein (Rho GTPase binding) 1 [Source:MGI Symbol;Acc:MGI:1929763]	-
ENSMUSG00000028259	7.85971	2.28125	1.79253	0.0136248	0.391592	4.1121	8.08195	-0.969855	0.079968	0.558986	3.98974	7.97691	-0.998395	0.0989303	0.601439	2.82229	8.04485	-1.52343	0.0199075	1	Fhl5	4	25199908	25242876	-	1171	protein_coding	four and a half LIM domains 5 [Source:MGI Symbol;Acc:MGI:1913192]	-
ENSMUSG00000044067	180.073	245.4	-0.445606	0.0137439	0.394161	224.311	185.203	0.275121	0.0811665	0.559984	249.826	182.745	0.448708	0.000512043	0.0218258	199.921	184.336	0.116488	0.306472	0.999695	Gpr22	12	31706867	31713947	-	4608	protein_coding	G protein-coupled receptor 22 [Source:MGI Symbol;Acc:MGI:1920260]	-
ENSMUSG00000100131	189.71	263.998	-0.476443	0.0138279	0.395443	210.021	195.07	0.106009	0.63661	0.940707	256.684	192.539	0.414206	0.0130724	0.226769	196.21	194.168	0.0156257	0.914155	0.999695	Gm28439	1	24611535	24612410	-	876	unprocessed_pseudogene	predicted gene 28439 [Source:MGI Symbol;Acc:MGI:5579145]	-
ENSMUSG00000047454	822.899	963.191	-0.227122	0.0138136	0.395443	873.888	846.53	0.0458625	0.639951	0.940707	934.172	835.17	0.161354	0.0310934	0.364555	866.892	842.411	0.0417896	0.487135	0.999695	Gphn	12	78226379	78684772	+	3749	protein_coding	gephyrin [Source:MGI Symbol;Acc:MGI:109602]	-
ENSMUSG00000078881	17.4549	2.74269	2.66967	0.0138626	0.395871	2.78365	17.9161	-2.69011	0.0417401	0.431363	3.62347	17.7148	-2.28464	0.101085	0.607113	3.98429	17.8546	-2.16743	0.021882	0.999695	Gm14434	2	176473278	176486783	-	2774	protein_coding	predicted gene 14434 [Source:MGI Symbol;Acc:MGI:3702417]	zf-C2H2
ENSMUSG00000073062	166.747	225.526	-0.434481	0.0139466	0.396635	177.575	171.504	0.0495093	0.695437	0.950695	189.024	169.224	0.158229	0.228206	0.760735	177.292	170.698	0.0540177	0.642895	0.999695	Zxdb	X	94724569	94730187	+	5619	protein_coding	zinc finger, X-linked, duplicated B [Source:MGI Symbol;Acc:MGI:3694898]	zf-C2H2
ENSMUSG00000038781	23.0786	10.9405	1.07206	0.0139197	0.396635	32.8007	23.7475	0.469591	0.207332	0.738597	18.7399	23.4246	-0.315396	0.336016	0.827335	20.3919	23.6274	-0.211703	0.437876	0.999695	Stap2	17	55997077	56005584	-	2569	protein_coding	signal transducing adaptor family member 2 [Source:MGI Symbol;Acc:MGI:2147039]	-
ENSMUSG00000050777	15.5315	6.80342	1.19811	0.0139485	0.396635	21.9828	15.9929	0.459778	0.237522	0.763818	14.2365	15.763	-0.144044	0.77406	0.96301	14.5802	15.907	-0.126171	0.748753	0.999695	Tmem37	1	120067377	120074074	-	1311	protein_coding	transmembrane protein 37 [Source:MGI Symbol;Acc:MGI:2157899]	-
ENSMUSG00000027805	2489.48	2819.08	-0.179449	0.0141201	0.400381	2781.04	2561.03	0.118916	0.134318	0.65589	2689.03	2526.57	0.0896038	0.159649	0.689383	2644.36	2548.57	0.0533168	0.320112	0.999695	Pfn2	3	57841895	57848079	-	3541	protein_coding	profilin 2 [Source:MGI Symbol;Acc:MGI:97550]	-
ENSMUSG00000070315	487.938	385.416	0.339738	0.0141121	0.400381	454.46	501.865	-0.14353	0.149841	0.677067	471.749	495.195	-0.0697865	0.404054	0.854774	474.331	499.481	-0.0748527	0.326303	0.999695	4930581F22Rik	9	35116728	35130922	+	5954	processed_transcript	RIKEN cDNA 4930581F22 gene [Source:MGI Symbol;Acc:MGI:1926184]	-
ENSMUSG00000023341	18.7465	33.527	-0.838886	0.0141701	0.400669	48.3299	19.2921	1.32341	2.55174e-05	0.00434902	32.5436	19.0274	0.779656	0.0362085	0.394629	39.9165	19.1926	1.05466	0.000112143	0.0631295	Mx2	16	97535308	97560900	+	3614	polymorphic_pseudogene	MX dynamin-like GTPase 2 [Source:MGI Symbol;Acc:MGI:97244]	-
ENSMUSG00000048537	329.999	241.723	0.44847	0.0141639	0.400669	310.884	339.409	-0.12678	0.296401	0.811894	284.981	334.876	-0.23139	0.0799046	0.556759	312.185	337.836	-0.11432	0.255233	0.999695	Phldb1	9	44686304	44735198	-	7179	protein_coding	pleckstrin homology like domain, family B, member 1 [Source:MGI Symbol;Acc:MGI:2143230]	-
ENSMUSG00000093390	8.48635	2.22501	1.9168	0.0142053	0.4011	9.28075	8.73689	0.0900286	0.856616	0.977086	7.12974	8.61547	-0.260118	0.639232	0.934057	7.89799	8.68787	-0.130259	0.796209	1	Gm20652	3	88616457	88621061	-	383	antisense	predicted gene 20652 [Source:MGI Symbol;Acc:MGI:5313099]	-
ENSMUSG00000020080	182.549	135.482	0.430281	0.0142721	0.402422	214.294	187.813	0.190436	0.19705	0.728236	190.165	185.269	0.0401909	0.829142	0.970611	220.938	186.882	0.241546	0.0555072	0.999695	Hkdc1	10	62383137	62422491	-	5132	protein_coding	hexokinase domain containing 1 [Source:MGI Symbol;Acc:MGI:2384910]	-
ENSMUSG00000035329	608.367	717.076	-0.237093	0.0143532	0.404142	677.99	625.78	0.115414	0.168551	0.699944	715.155	617.412	0.211364	0.00923499	0.181596	680.238	622.804	0.127312	0.119007	0.999695	Fbxo33	12	59200655	59219725	-	4466	protein_coding	F-box protein 33 [Source:MGI Symbol;Acc:MGI:1917861]	-
ENSMUSG00000093686	6.68574	1.73198	1.93359	0.0144224	0.405523	4.30399	6.88112	-0.672684	0.34425	0.837669	3.30798	6.78625	-1.05102	0.129935	0.655087	5.92528	6.8446	-0.20271	0.714661	1	Gm4705	17	66413631	66413984	-	354	processed_pseudogene	predicted gene 4705 [Source:MGI Symbol;Acc:MGI:3782885]	-
ENSMUSG00000033488	186.488	100.918	0.886695	0.0145108	0.407436	253.426	192.047	0.399889	0.290787	0.807821	80.5089	189.255	-1.23231	7.53198e-05	0.00460638	162.269	191.013	-0.235839	0.526503	0.999695	Cryzl2	1	157458577	157492638	+	2534	protein_coding	crystallin zeta like 2 [Source:MGI Symbol;Acc:MGI:2448516]	-
ENSMUSG00000057715	23.9008	38.9102	-0.701623	0.0145942	0.409206	22.0225	24.5937	-0.166248	0.634649	0.940665	46.9318	24.2567	0.945116	0.00351229	0.0954681	21.1065	24.4713	-0.213824	0.599606	0.999695	A830018L16Rik	1	11414105	11975901	+	9183	protein_coding	RIKEN cDNA A830018L16 gene [Source:MGI Symbol;Acc:MGI:2444149]	-
ENSMUSG00000030125	51.1101	30.3041	0.750765	0.014675	0.410327	48.422	52.5837	-0.116466	0.680829	0.9483	38.345	51.874	-0.433257	0.067319	0.521722	50.2123	52.3211	-0.0614382	0.774307	0.999695	Lrrc23	6	124769863	124779727	-	1734	protein_coding	leucine rich repeat containing 23 [Source:MGI Symbol;Acc:MGI:1315192]	-
ENSMUSG00000020887	3.70689	10.0069	-1.43211	0.0146611	0.410327	4.35411	3.8094	0.185404	0.776243	0.963455	5.37407	3.76133	0.523737	0.465289	0.879774	5.96371	3.79405	0.648524	0.276483	1	A230052G05Rik	8	70863127	70865428	+	2302	TEC	RIKEN cDNA A230052G05 gene [Source:MGI Symbol;Acc:MGI:3045239]	-
ENSMUSG00000101356	22.536	11.9268	0.915114	0.0147449	0.41171	23.7712	23.1875	0.03157	0.909448	0.983416	20.5974	22.8698	-0.152766	0.637761	0.933654	18.3395	23.0747	-0.331917	0.311257	0.999695	Gm28876	15	103096151	103102111	-	703	lincRNA	predicted gene 28876 [Source:MGI Symbol;Acc:MGI:5579582]	-
ENSMUSG00000029291	5942.84	6679.62	-0.168587	0.0149396	0.416567	5858.81	6112.78	-0.0612005	0.248708	0.772855	6327.92	6031.24	0.0691184	0.229888	0.760927	6063.2	6083.64	-0.00486271	0.917276	0.999695	Rufy3	5	88565040	88651392	+	10214	protein_coding	RUN and FYVE domain containing 3 [Source:MGI Symbol;Acc:MGI:106484]	-
ENSMUSG00000024190	353.81	276.03	0.356957	0.015084	0.419432	336.001	363.909	-0.115627	0.205095	0.736042	387.959	359.055	0.112923	0.312202	0.816649	384.94	362.205	0.0878306	0.526851	0.999695	Dusp1	17	26505590	26508519	-	2697	protein_coding	dual specificity phosphatase 1 [Source:MGI Symbol;Acc:MGI:105120]	-
ENSMUSG00000053977	6.63368	25.4202	-1.93455	0.0150712	0.419432	15.5624	6.81958	1.18757	0.0125748	0.240123	7.16074	6.73255	0.0930848	0.86408	0.977663	9.94706	6.78882	0.547145	0.252766	1	Cd8a	6	71373427	71379173	+	3637	protein_coding	CD8 antigen, alpha chain [Source:MGI Symbol;Acc:MGI:88346]	-
ENSMUSG00000078185	166.588	234.631	-0.493281	0.01512	0.419852	130.368	171.272	-0.394827	0.00632771	0.160963	154.94	169.055	-0.129347	0.48093	0.884673	155.715	170.512	-0.131413	0.371334	0.999695	Chml	1	175682237	175692901	-	6975	protein_coding	choroideremia-like [Source:MGI Symbol;Acc:MGI:101913]	-
ENSMUSG00000021250	503.021	356.218	0.497958	0.0151494	0.420087	428.888	517.247	-0.270673	0.0939797	0.59098	313.707	510.403	-0.701376	0.00139372	0.0481089	438.222	514.961	-0.232775	0.38543	0.999695	Fos	12	85473890	85477273	+	2352	protein_coding	FBJ osteosarcoma oncogene [Source:MGI Symbol;Acc:MGI:95574]	TF_bZIP
ENSMUSG00000048856	141.957	100.263	0.501096	0.0151708	0.420101	126.715	146.047	-0.205123	0.1999	0.73163	100.043	144.067	-0.523966	0.00181493	0.058791	128.799	145.333	-0.176123	0.207238	0.999695	Slc25a47	12	108836046	108856815	+	2985	protein_coding	solute carrier family 25, member 47 [Source:MGI Symbol;Acc:MGI:2144766]	-
ENSMUSG00000020836	86.6531	139.658	-0.689159	0.0152247	0.421013	76.8493	89.0823	-0.213052	0.319926	0.826467	117.718	87.9344	0.420772	0.0536883	0.473517	67.8413	88.6903	-0.386284	0.0694713	0.999695	Coro6	11	77462411	77470484	+	3011	protein_coding	coronin 6 [Source:MGI Symbol;Acc:MGI:2183448]	-
ENSMUSG00000047638	74.8458	51.1132	0.552735	0.0153035	0.422042	82.0928	77.0052	0.0922617	0.624913	0.938352	54.827	75.9653	-0.468658	0.0184854	0.277355	64.752	76.6239	-0.241259	0.191324	0.999695	Nr1h4	10	89454234	89533585	-	2303	protein_coding	nuclear receptor subfamily 1, group H, member 4 [Source:MGI Symbol;Acc:MGI:1352464]	THR-like
ENSMUSG00000028173	133.511	83.9149	0.671723	0.0153039	0.422042	117.558	137.215	-0.223486	0.359579	0.845793	107.321	135.46	-0.339504	0.220249	0.755395	119.24	136.655	-0.198012	0.404775	0.999695	Wls	3	159839672	159938664	+	8792	protein_coding	wntless WNT ligand secretion mediator [Source:MGI Symbol;Acc:MGI:1915401]	-
ENSMUSG00000054204	13.2529	4.41843	1.57276	0.0154814	0.42577	8.10117	13.6408	-0.755146	0.192342	0.724897	6.5417	13.4481	-1.02791	0.111866	0.622873	12.4179	13.5724	-0.127234	0.779398	0.999695	Alkal2	12	30884322	30893854	+	1509	protein_coding	ALK and LTK ligand 2 [Source:MGI Symbol;Acc:MGI:3697448]	-
ENSMUSG00000037568	106.339	81.0656	0.391581	0.0154803	0.42577	91.3189	109.39	-0.261602	0.0677577	0.522936	101.392	107.917	-0.0901531	0.599749	0.925302	103.624	108.867	-0.0713506	0.590506	0.999695	Vash2	1	190947646	190979296	-	4314	protein_coding	vasohibin 2 [Source:MGI Symbol;Acc:MGI:2444826]	-
ENSMUSG00000019577	10.4366	3.19691	1.6911	0.0156535	0.429015	5.12349	10.7328	-1.06634	0.0522143	0.470878	5.06487	10.5917	-1.07347	0.0731376	0.541994	4.41814	10.6842	-1.28038	0.0340987	1	Pdk4	6	5483351	5496309	-	3511	protein_coding	pyruvate dehydrogenase kinase, isoenzyme 4 [Source:MGI Symbol;Acc:MGI:1351481]	-
ENSMUSG00000020363	37.112	19.0878	0.965987	0.0156263	0.429015	33.9152	38.1515	-0.169677	0.638743	0.940707	24.9498	37.6571	-0.595482	0.0769991	0.550135	35.8398	37.9921	-0.0822772	0.781955	0.999695	Gfpt2	11	49794178	49838613	+	5591	protein_coding	glutamine fructose-6-phosphate transaminase 2 [Source:MGI Symbol;Acc:MGI:1338883]	-
ENSMUSG00000106490	11.4676	3.82066	1.59351	0.0156675	0.429015	4.30319	11.799	-1.4485	0.0136899	0.249097	6.2043	11.6393	-0.929823	0.27582	0.796224	8.14081	11.7404	-0.524855	0.309048	1	Gm43283	3	123209400	123211947	-	2548	TEC	predicted gene 43283 [Source:MGI Symbol;Acc:MGI:5663420]	-
ENSMUSG00000027599	944.888	1130.53	-0.258437	0.0156847	0.429015	978.652	971.944	0.00997431	0.886592	0.980335	1012.52	958.955	0.0775296	0.298031	0.808703	980.145	967.284	0.0189802	0.721111	0.999695	Armc1	3	19131402	19163065	-	3673	protein_coding	armadillo repeat containing 1 [Source:MGI Symbol;Acc:MGI:1921502]	-
ENSMUSG00000025962	224.354	285.559	-0.347476	0.0157137	0.429224	250.445	230.782	0.118578	0.233731	0.762124	264.715	227.697	0.218359	0.0361441	0.394426	259.288	229.668	0.174945	0.0712667	0.999695	Fastkd2	1	63730614	63754655	+	5873	protein_coding	FAST kinase domains 2 [Source:MGI Symbol;Acc:MGI:1922869]	-
ENSMUSG00000022500	120.27	76.4526	0.65622	0.0157642	0.430019	161.582	123.76	0.384141	0.0562876	0.483209	110.975	122.065	-0.135878	0.533015	0.901751	121.004	123.133	-0.0261415	0.871793	0.999695	Litaf	16	10959275	11066157	-	5156	protein_coding	LPS-induced TN factor [Source:MGI Symbol;Acc:MGI:1929512]	zf-LITAF-like
ENSMUSG00000043091	180.259	244.192	-0.437399	0.0158398	0.431495	248.024	185.457	0.419173	0.00670609	0.166128	996.124	182.938	2.44547	2.40406e-75	5.41058e-71	210.702	184.546	0.190889	0.21908	0.999695	Tuba1c	15	99029891	99038110	+	2287	protein_coding	tubulin, alpha 1C [Source:MGI Symbol;Acc:MGI:1095409]	-
ENSMUSG00000108207	199.331	160.458	0.312671	0.0158853	0.43215	159.661	205.013	-0.362807	0.00436482	0.125628	146.281	202.29	-0.465813	0.000518978	0.0220796	182.174	204.051	-0.164009	0.161053	0.999695	1810059H22Rik	5	148953748	148970122	-	5024	processed_transcript	RIKEN cDNA 1810059H22 gene [Source:MGI Symbol;Acc:MGI:1917070]	-
ENSMUSG00000040125	742.419	554.789	0.420113	0.0159304	0.43279	601.989	763.35	-0.342614	0.0578562	0.48768	841.44	753.459	0.159085	0.257635	0.784351	670.398	759.883	-0.180579	0.241817	0.999695	Gpr26	7	131966460	131994405	+	11571	protein_coding	G protein-coupled receptor 26 [Source:MGI Symbol;Acc:MGI:2441758]	-
ENSMUSG00000024359	2898.24	2590.71	0.161779	0.0160373	0.435062	2564.64	2981.36	-0.217086	0.000128671	0.0138504	2351.08	2941.36	-0.322809	6.09408e-10	1.30622e-07	2869.1	2966.99	-0.048292	0.366845	0.999695	Hspa9	18	34937414	34954357	-	3932	protein_coding	heat shock protein 9 [Source:MGI Symbol;Acc:MGI:96245]	-
ENSMUSG00000027276	2335.48	2684.91	-0.201165	0.0160573	0.435062	2185.33	2402.44	-0.136686	0.191954	0.724897	2458.26	2370.26	0.0523921	0.57976	0.919174	2417.82	2390.87	0.0162497	0.77314	0.999695	Jag1	2	137081456	137116644	-	5827	protein_coding	jagged 1 [Source:MGI Symbol;Acc:MGI:1095416]	-
ENSMUSG00000061080	1935.8	2466.39	-0.349452	0.0161254	0.435147	1918.48	1990.51	-0.0532393	0.688026	0.94974	2227.45	1964.58	0.181	0.128079	0.652965	1990.38	1981.4	0.00665346	0.947737	0.999695	Lsamp	16	39984361	42181679	+	17213	protein_coding	limbic system-associated membrane protein [Source:MGI Symbol;Acc:MGI:1261760]	-
ENSMUSG00000028197	65.5882	45.1686	0.536413	0.0160899	0.435147	62.7906	67.4532	-0.103754	0.582049	0.92784	79.0809	66.5602	0.252329	0.227111	0.759456	52.377	67.1384	-0.357722	0.0472839	0.999695	Col24a1	3	145292472	145552011	+	7621	protein_coding	collagen, type XXIV, alpha 1 [Source:MGI Symbol;Acc:MGI:1918605]	-
ENSMUSG00000021493	461.01	301.875	0.610356	0.0161042	0.435147	463.808	474.345	-0.032531	0.840119	0.974492	489.391	467.867	0.0652451	0.662998	0.941189	431.252	471.991	-0.130381	0.274036	0.999695	Pdlim7	13	55495795	55513676	-	4849	protein_coding	PDZ and LIM domain 7 [Source:MGI Symbol;Acc:MGI:1914649]	-
ENSMUSG00000053062	2033.8	2464.53	-0.277111	0.0162075	0.436193	1980.71	2091.53	-0.0784871	0.423979	0.870879	2357.36	2064.05	0.191715	0.0335408	0.380862	2083.01	2081.82	0.000826299	0.991544	0.999695	Jam2	16	84774123	84825928	+	6045	protein_coding	junction adhesion molecule 2 [Source:MGI Symbol;Acc:MGI:1933820]	-
ENSMUSG00000051412	308.856	382.024	-0.307094	0.0162056	0.436193	342.086	317.781	0.106146	0.429104	0.872595	323.306	313.455	0.0423544	0.791199	0.964611	300.624	316.21	-0.0728423	0.458496	0.999695	Vamp7	GL456233.1	10738	39148	-	2534	protein_coding	Mus musculus vesicle-associated membrane protein 7 (Vamp7), transcript variant 3, mRNA. [Source:RefSeq mRNA;Acc:NM_001359151]	-
ENSMUSG00000032011	1461.53	1894.13	-0.374228	0.0162935	0.436866	1443.02	1503.68	-0.0593586	0.673138	0.945603	1136.36	1483.25	-0.383806	0.00027803	0.0134656	1549.6	1496.33	0.0505523	0.551064	0.999695	Thy1	9	44043384	44048579	+	2995	protein_coding	thymus cell antigen 1, theta [Source:MGI Symbol;Acc:MGI:98747]	-
ENSMUSG00000067736	58.9277	88.8258	-0.592263	0.0162977	0.436866	65.4645	60.5656	0.111493	0.703603	0.952752	72.8668	59.7989	0.284781	0.230302	0.760981	63.4668	60.3079	0.0736663	0.770325	0.999695	Gm10222	1	24612407	24612700	-	294	unprocessed_pseudogene	predicted gene 10222 [Source:MGI Symbol;Acc:MGI:3642643]	-
ENSMUSG00000021130	212.146	275.228	-0.376387	0.0162827	0.436866	242.375	218.207	0.150114	0.146056	0.672409	236.31	215.291	0.13441	0.238271	0.766851	213.634	217.182	-0.0244585	0.804353	0.999695	Galnt16	12	80518277	80630972	+	8047	protein_coding	polypeptide N-acetylgalactosaminyltransferase 16 [Source:MGI Symbol;Acc:MGI:1917754]	-
ENSMUSG00000049881	163.419	126.139	0.373036	0.0164447	0.440219	156.822	168.117	-0.100539	0.435334	0.874774	122.921	165.85	-0.429429	0.00737697	0.156924	167.654	167.302	0.00208733	0.985416	0.999695	2810025M15Rik	1	157412352	157420236	+	1410	transcribed_processed_pseudogene	RIKEN cDNA 2810025M15 gene [Source:MGI Symbol;Acc:MGI:1917203]	-
ENSMUSG00000063434	94.0033	141.953	-0.594693	0.0164964	0.441016	115.94	96.6279	0.263326	0.282305	0.801201	153.173	95.4063	0.683727	0.00358191	0.0965855	120.925	96.1975	0.330322	0.118684	0.999695	Sorcs3	19	48206025	48805505	+	5634	protein_coding	sortilin-related VPS10 domain containing receptor 3 [Source:MGI Symbol;Acc:MGI:1913923]	-
ENSMUSG00000104318	36.8924	56.8295	-0.621455	0.0168739	0.450509	36.6148	37.9323	-0.0506049	0.86674	0.97848	45.1607	37.4372	0.268682	0.30412	0.813178	46.0025	37.7639	0.285354	0.249544	0.999695	Pcdha7	18	36973802	37187657	+	5337	protein_coding	protocadherin alpha 7 [Source:MGI Symbol;Acc:MGI:1298369]	-
ENSMUSG00000029757	469.946	579.684	-0.303452	0.0169617	0.452251	513.404	483.413	0.0862511	0.399678	0.861981	536.257	476.944	0.167403	0.0653381	0.515061	493.92	481.085	0.0380118	0.667379	0.999695	Dync1i1	6	5725639	6028039	+	3572	protein_coding	dynein cytoplasmic 1 intermediate chain 1 [Source:MGI Symbol;Acc:MGI:107743]	-
ENSMUSG00000097466	8.3038	17.5584	-1.08769	0.0170994	0.455149	8.26138	8.5413	-0.0416346	0.92866	0.987728	11.18	8.42914	0.415043	0.420624	0.862752	8.14269	8.4991	-0.0566104	0.907139	1	D430036J16Rik	9	81631551	81645156	+	2234	antisense	RIKEN cDNA D430036J16 gene [Source:MGI Symbol;Acc:MGI:2441977]	-
ENSMUSG00000050663	162.572	219.855	-0.435082	0.0171156	0.455149	163.807	167.156	-0.0301417	0.874851	0.97892	179.22	164.975	0.11633	0.594686	0.922989	153.882	166.409	-0.112042	0.415535	0.999695	Trhde	10	114398823	114802307	-	8065	protein_coding	TRH-degrading enzyme [Source:MGI Symbol;Acc:MGI:2384311]	-
ENSMUSG00000036309	2011.48	2367.28	-0.234883	0.0171737	0.456091	2308.71	2069.54	0.157784	0.0456981	0.4474	2103.4	2041.46	0.0428869	0.554988	0.910987	2208.39	2059.33	0.100758	0.126885	0.999695	Skp1a	11	52231995	52246858	+	2211	protein_coding	S-phase kinase-associated protein 1A [Source:MGI Symbol;Acc:MGI:103575]	-
ENSMUSG00000020297	1405.11	1781.16	-0.342198	0.0172113	0.456418	1685.75	1445.89	0.221267	0.0310051	0.37433	1609.38	1426.03	0.174485	0.101537	0.607603	1573.9	1438.64	0.12956	0.188701	0.999695	Nsg2	11	32000463	32059202	+	4157	protein_coding	neuron specific gene family member 2 [Source:MGI Symbol;Acc:MGI:1202070]	-
ENSMUSG00000092373	22.0505	37.3656	-0.759709	0.0172315	0.456418	17.6333	22.6628	-0.362033	0.304645	0.817986	18.3033	22.374	-0.295337	0.396139	0.851745	23.665	22.5688	0.0698056	0.81104	0.999695	Gm20535	12	21252118	21255952	-	1268	processed_transcript	predicted gene 20535 [Source:MGI Symbol;Acc:MGI:5142000]	-
ENSMUSG00000062488	128.068	205.463	-0.681263	0.0172742	0.456948	245.097	131.767	0.89452	0.000252979	0.0216482	175.353	129.978	0.433077	0.113835	0.628049	176.657	131.112	0.428558	0.0019414	0.458475	Ifit3b	19	34607970	34613401	+	2000	protein_coding	interferon-induced protein with tetratricopeptide repeats 3B [Source:MGI Symbol;Acc:MGI:3698419]	-
ENSMUSG00000029752	817.773	681.062	0.264217	0.0173173	0.457486	435.108	841.279	-0.950916	4.23118e-19	1.23623e-15	355.051	829.978	-1.22374	1.67221e-31	4.18165e-28	874.026	837.162	0.0621366	0.349176	0.999695	Asns	6	7675169	7693254	-	2735	protein_coding	asparagine synthetase [Source:MGI Symbol;Acc:MGI:1350929]	-
ENSMUSG00000028763	214.249	166.047	0.369498	0.0174037	0.459166	201.612	220.403	-0.129018	0.328647	0.830293	155.4	217.426	-0.487243	0.000215595	0.0108793	190.697	219.35	-0.202872	0.113647	0.999695	Hspg2	4	137468769	137570630	+	14307	protein_coding	perlecan (heparan sulfate proteoglycan 2) [Source:MGI Symbol;Acc:MGI:96257]	-
ENSMUSG00000002633	46.9142	68.4055	-0.543523	0.0175941	0.461164	60.5331	48.2676	0.324069	0.120952	0.637718	73.7704	47.6109	0.630202	0.00222942	0.0695488	52.391	48.0336	0.123895	0.540073	0.999695	Shh	5	28456815	28467256	-	2847	protein_coding	sonic hedgehog [Source:MGI Symbol;Acc:MGI:98297]	-
ENSMUSG00000073563	766.028	945.46	-0.303224	0.0175707	0.461164	816.025	787.995	0.0501065	0.609895	0.935153	820.904	777.444	0.0783131	0.262445	0.787401	791.883	784.188	0.0144136	0.798556	0.999695	Csnk1g3	18	53862113	53955684	+	4394	protein_coding	casein kinase 1, gamma 3 [Source:MGI Symbol;Acc:MGI:1917675]	-
ENSMUSG00000115752	9.35722	2.92647	1.65716	0.0175057	0.461164	6.3151	9.6312	-0.614036	0.204385	0.736042	6.69788	9.49677	-0.525376	0.366927	0.843519	5.51697	9.5808	-0.794079	0.132938	1	1700010G06Rik	15	64314497	64316076	+	683	antisense	RIKEN cDNA 1700010G06 gene [Source:MGI Symbol;Acc:MGI:1921467]	-
ENSMUSG00000028917	1035.55	879.801	0.23517	0.0175389	0.461164	1013.04	1065.33	-0.0724579	0.324558	0.829032	1007.4	1050.95	-0.0603944	0.439819	0.871727	1002.25	1060.16	-0.0809195	0.192671	0.999695	Plekhm2	4	141625734	141664899	-	5186	protein_coding	pleckstrin homology domain containing, family M (with RUN domain) member 2 [Source:MGI Symbol;Acc:MGI:1916832]	-
ENSMUSG00000109868	25.1824	38.35	-0.605772	0.0175854	0.461164	30.581	25.9076	0.239546	0.357089	0.844178	26.8544	25.5588	0.0765921	0.797373	0.9661	26.5781	25.7798	0.0469197	0.861833	0.999695	Gm39244	8	108526937	108537221	-	2797	lincRNA	predicted gene, 39244 [Source:MGI Symbol;Acc:MGI:5622129]	-
ENSMUSG00000042988	15.4319	6.21965	1.30667	0.0176205	0.461243	16.0078	15.8956	0.0117572	0.983471	0.997597	5.19014	15.6636	-1.62204	0.00608106	0.139047	13.214	15.8055	-0.255984	0.503213	0.999695	Notum	11	120653788	120661175	-	2408	protein_coding	notum palmitoleoyl-protein carboxylesterase [Source:MGI Symbol;Acc:MGI:1924833]	-
ENSMUSG00000020151	202.07	250.604	-0.31008	0.017643	0.461243	233.379	207.853	0.166379	0.217866	0.749126	247.425	205.077	0.268559	0.0373228	0.402292	228.242	206.862	0.14198	0.153759	0.999695	Ptprr	10	116018213	116274932	+	5929	protein_coding	protein tyrosine phosphatase, receptor type, R [Source:MGI Symbol;Acc:MGI:109559]	-
ENSMUSG00000027895	286.88	368.475	-0.361321	0.017728	0.461772	340.723	295.084	0.207419	0.0959652	0.59405	349.246	291.132	0.261734	0.0457464	0.440008	269.668	293.683	-0.122638	0.347944	0.999695	Kcnc4	3	107438303	107459552	-	3667	protein_coding	potassium voltage gated channel, Shaw-related subfamily, member 4 [Source:MGI Symbol;Acc:MGI:96670]	-
ENSMUSG00000056749	284.79	225.024	0.339203	0.0177536	0.461772	291.032	293.067	-0.0096812	0.943117	0.990481	247.475	289.054	-0.223159	0.136857	0.665191	271.174	291.564	-0.104618	0.33575	0.999695	Nfil3	13	52967209	52981073	-	2026	protein_coding	nuclear factor, interleukin 3, regulated [Source:MGI Symbol;Acc:MGI:109495]	TF_bZIP
ENSMUSG00000058402	368.187	446.229	-0.277617	0.0177268	0.461772	415.304	378.769	0.133036	0.214302	0.746493	410.336	373.674	0.134796	0.220677	0.755395	404.052	376.927	0.101287	0.23207	0.999695	Zfp420	7	29859979	29877292	+	5751	protein_coding	zinc finger protein 420 [Source:MGI Symbol;Acc:MGI:2444666]	zf-C2H2
ENSMUSG00000024042	175.616	137.438	0.352358	0.0177552	0.461772	161.169	180.66	-0.165979	0.170373	0.70088	179.751	178.228	0.0126557	0.915763	0.987296	202.613	179.791	0.171968	0.106579	0.999695	Sik1	17	31844248	31855792	-	4511	protein_coding	salt inducible kinase 1 [Source:MGI Symbol;Acc:MGI:104754]	-
ENSMUSG00000090258	101.042	134.205	-0.409727	0.0177934	0.462169	138.668	103.971	0.415498	0.016539	0.271256	107.853	102.552	0.0748327	0.620762	0.930149	129.29	103.446	0.321242	0.036167	0.999695	Churc1	12	76765538	76783180	+	5693	protein_coding	churchill domain containing 1 [Source:MGI Symbol;Acc:MGI:1923684]	-
ENSMUSG00000001827	139.511	103.267	0.433268	0.0178481	0.46299	178.271	143.441	0.313536	0.229784	0.760359	89.6749	141.565	-0.660277	0.000216324	0.0108917	150.656	142.81	0.0765485	0.608879	0.999695	Folr1	7	101858331	101870788	-	2297	protein_coding	folate receptor 1 (adult) [Source:MGI Symbol;Acc:MGI:95568]	-
ENSMUSG00000085998	20.5607	10.2139	1.00883	0.0179065	0.463909	12.1174	21.1552	-0.804387	0.03357	0.387676	17.1497	20.8643	-0.279164	0.536568	0.903758	17.2329	21.0537	-0.292646	0.404109	0.999695	AW822252	X	53695855	53716773	-	4066	transcribed_unprocessed_pseudogene	expressed sequence AW822252 [Source:MGI Symbol;Acc:MGI:2148030]	-
ENSMUSG00000031503	629.26	497.347	0.33898	0.0179393	0.464158	661.182	647.386	0.0304363	0.773079	0.963072	710.215	638.619	0.15365	0.0861197	0.573635	604.669	644.224	-0.0913313	0.243556	0.999695	Col4a2	8	11312805	11449287	+	6619	protein_coding	collagen, type IV, alpha 2 [Source:MGI Symbol;Acc:MGI:88455]	-
ENSMUSG00000026587	789.619	981.973	-0.314418	0.0180022	0.465189	810.536	812.015	-0.00273478	0.983686	0.997637	941.701	801.361	0.232303	0.0378335	0.404312	810.242	808.255	0.00386859	0.966207	0.999695	Astn1	1	158362273	158691781	+	9839	protein_coding	astrotactin 1 [Source:MGI Symbol;Acc:MGI:1098567]	-
ENSMUSG00000079019	17.2564	7.23792	1.25376	0.0180375	0.465502	19.4454	17.7559	0.127517	0.743695	0.95795	14.7882	17.5105	-0.236509	0.634702	0.933359	22.1893	17.6694	0.324308	0.360975	0.999695	Insl3	8	71689214	71690575	+	623	protein_coding	insulin-like 3 [Source:MGI Symbol;Acc:MGI:108427]	-
ENSMUSG00000030704	1973.42	2519.66	-0.352383	0.018085	0.466128	2060.94	2029.67	0.0218912	0.744802	0.958243	2143.12	2002.75	0.0972495	0.208162	0.742925	2054.05	2020.13	0.0240914	0.649689	0.999695	Rab6a	7	100607410	100641268	+	3728	protein_coding	RAB6A, member RAS oncogene family [Source:MGI Symbol;Acc:MGI:894313]	-
ENSMUSG00000001870	211.647	154.5	0.45557	0.0181095	0.466163	238.485	217.618	0.131131	0.509007	0.906577	181.042	214.76	-0.247249	0.24314	0.772192	238.269	216.668	0.136825	0.430297	0.999695	Ltbp1	17	75005568	75392512	+	10480	protein_coding	latent transforming growth factor beta binding protein 1 [Source:MGI Symbol;Acc:MGI:109151]	-
ENSMUSG00000041313	655.918	505.405	0.375912	0.0182306	0.467685	331.502	674.557	-1.02449	8.21367e-12	1.39988e-08	323.555	665.691	-1.04154	2.31742e-17	1.49017e-14	620.42	671.403	-0.113518	0.271628	0.999695	Slc7a1	5	148327410	148399904	-	11530	protein_coding	solute carrier family 7 (cationic amino acid transporter, y+ system), member 1 [Source:MGI Symbol;Acc:MGI:88117]	-
ENSMUSG00000097848	2.90408	9.15179	-1.65362	0.0182384	0.467685	5.41998	2.98757	0.859475	0.25263	0.776488	5.07874	2.94596	0.771361	0.362589	0.840554	3.59599	2.9746	0.263684	0.745821	1	Gm807	13	99100706	99107580	+	1871	lincRNA	predicted gene 807 [Source:MGI Symbol;Acc:MGI:2685653]	-
ENSMUSG00000018865	911.396	1215.85	-0.41591	0.0182293	0.467685	958.052	937.884	0.0307544	0.836677	0.97394	992.699	924.968	0.102023	0.383942	0.848224	965.299	933.162	0.048869	0.678578	0.999695	Sult4a1	15	84076097	84105754	-	2512	protein_coding	sulfotransferase family 4A, member 1 [Source:MGI Symbol;Acc:MGI:1888971]	-
ENSMUSG00000023963	81.4347	121.715	-0.577697	0.0182727	0.467968	116.925	83.7921	0.480782	0.0172086	0.27669	80.4497	82.6508	-0.0381644	0.829431	0.970611	92.4607	83.3725	0.149041	0.37648	0.999695	Cyp39a1	17	43667425	43751431	+	3053	protein_coding	cytochrome P450, family 39, subfamily a, polypeptide 1 [Source:MGI Symbol;Acc:MGI:1927096]	-
ENSMUSG00000044501	165.996	245.568	-0.564743	0.0183693	0.469844	187.085	170.758	0.13149	0.421577	0.87004	190.729	168.479	0.177457	0.282161	0.798722	203.278	169.926	0.259561	0.043658	0.999695	Zfp758	17	22361453	22377281	+	2974	protein_coding	zinc finger protein 758 [Source:MGI Symbol;Acc:MGI:2385044]	zf-C2H2
ENSMUSG00000068099	287.35	383.582	-0.416615	0.0184151	0.470416	361.933	295.732	0.291281	0.0593057	0.494064	443.679	291.623	0.604905	8.93697e-05	0.00527915	304.304	294.234	0.0481908	0.726184	0.999695	1500009C09Rik	15	82252397	82260753	+	1904	protein_coding	RIKEN cDNA 1500009C09 gene [Source:MGI Symbol;Acc:MGI:1923755]	-
ENSMUSG00000104850	6.82245	15.1596	-1.14637	0.0184444	0.470567	11.5875	7.00969	0.72206	0.105928	0.614225	12.0368	6.92228	0.802778	0.112715	0.625127	12.9258	6.98273	0.884123	0.0501144	1	Gm42901	3	53038585	53041755	-	3171	antisense	predicted gene 42901 [Source:MGI Symbol;Acc:MGI:5663038]	-
ENSMUSG00000109372	75.1704	54.3475	0.469474	0.0185284	0.471512	57.8163	77.3174	-0.420142	0.0233069	0.324255	47.3795	76.282	-0.686861	0.000482181	0.0209872	71.2005	76.9566	-0.113531	0.485033	0.999695	Gm19410	8	35765790	35818047	+	6352	protein_coding	predicted gene, 19410 [Source:MGI Symbol;Acc:MGI:5011595]	-
ENSMUSG00000111157	46.5986	25.3099	0.882115	0.0185115	0.471512	50.0887	47.9873	0.0603894	0.851958	0.976751	28.6328	47.292	-0.725553	0.0637602	0.509402	46.9941	47.7261	-0.0242181	0.939138	0.999695	Gm47887	9	55064927	55067463	-	1295	lincRNA	predicted gene, 47887 [Source:MGI Symbol;Acc:MGI:6097116]	-
ENSMUSG00000102899	39.4075	23.4628	0.743039	0.018655	0.474134	26.8731	40.5383	-0.590694	0.0876672	0.576126	31.0149	39.9991	-0.371898	0.313271	0.816649	35.1156	40.3384	-0.196409	0.541415	0.999695	Gm37850	9	107762808	107763587	+	549	antisense	predicted gene, 37850 [Source:MGI Symbol;Acc:MGI:5611078]	-
ENSMUSG00000035095	42.6676	26.1237	0.713722	0.0187765	0.475371	46.8019	43.8743	0.090336	0.75076	0.959629	29.7117	43.2993	-0.539599	0.0414423	0.419003	51.6466	43.6754	0.242934	0.28568	0.999695	Fam167a	14	63436394	63465498	+	4274	protein_coding	family with sequence similarity 167, member A [Source:MGI Symbol;Acc:MGI:3606565]	-
ENSMUSG00000025921	1048.68	814.354	0.365087	0.0187666	0.475371	1089.16	1078.65	0.0139254	0.924842	0.986957	912.808	1064.17	-0.221571	0.0934666	0.589992	1076.72	1073.6	0.00388427	0.975943	0.999695	Rdh10	1	16105774	16133734	+	4160	protein_coding	retinol dehydrogenase 10 (all-trans) [Source:MGI Symbol;Acc:MGI:1924238]	-
ENSMUSG00000047945	352.271	278.003	0.341971	0.0187735	0.475371	412.552	362.485	0.186472	0.168799	0.699944	309.002	357.515	-0.210068	0.200639	0.734901	361.416	360.674	0.00290304	0.981211	0.999695	Marcksl1	4	129513581	129515985	+	1605	protein_coding	MARCKS-like 1 [Source:MGI Symbol;Acc:MGI:97143]	-
ENSMUSG00000067870	133.249	92.3821	0.526624	0.0187983	0.475371	132.697	137.144	-0.0470603	0.804568	0.968199	118.667	135.243	-0.188792	0.291777	0.805308	103.427	136.431	-0.399949	0.0309248	0.999695	Rpl31-ps8	15	90764279	90764656	-	378	processed_pseudogene	ribosomal protein L31, pseudogene 8 [Source:MGI Symbol;Acc:MGI:3647726]	-
ENSMUSG00000105336	10.537	3.65575	1.50699	0.0188728	0.476059	2.96746	10.8308	-1.87676	0.000708813	0.0428655	4.74858	10.693	-1.17548	0.0398626	0.413025	4.18599	10.7841	-1.37228	0.00705902	1	AU022133	3	58665470	58666566	-	873	processed_pseudogene	expressed sequence AU022133 [Source:MGI Symbol;Acc:MGI:2139888]	-
ENSMUSG00000041684	368.686	429.63	-0.220427	0.0188646	0.476059	393.157	379.236	0.0519972	0.587453	0.927943	401.714	374.175	0.10131	0.236451	0.765971	378.383	377.421	0.00289252	0.972624	0.999695	Bivm	1	44118957	44144770	+	4206	protein_coding	basic, immunoglobulin-like variable motif containing [Source:MGI Symbol;Acc:MGI:2179809]	-
ENSMUSG00000032714	228.886	170.63	0.42265	0.0189552	0.476345	230.038	235.468	-0.0339974	0.805135	0.968199	171.939	232.296	-0.431958	0.0190555	0.281483	223.249	234.317	-0.0702199	0.533424	0.999695	Syde1	10	78584503	78591964	-	3288	protein_coding	synapse defective 1, Rho GTPase, homolog 1 (C. elegans) [Source:MGI Symbol;Acc:MGI:1918959]	-
ENSMUSG00000041301	50.1625	28.9183	0.798875	0.0189358	0.476345	31.9475	51.6137	-0.693406	0.00527223	0.143197	35.3584	50.9164	-0.532315	0.0575975	0.488981	25.3153	51.3516	-1.01839	3.13507e-05	0.0287948	Cftr	6	18170687	18322768	+	7765	protein_coding	cystic fibrosis transmembrane conductance regulator [Source:MGI Symbol;Acc:MGI:88388]	-
ENSMUSG00000059013	218.613	164.276	0.410991	0.0189128	0.476345	269.779	224.987	0.261783	0.0377743	0.410281	261.535	221.876	0.238035	0.119433	0.637612	228.576	223.835	0.0303314	0.82135	0.999695	Sh2d3c	2	32721055	32755512	+	5233	protein_coding	SH2 domain containing 3C [Source:MGI Symbol;Acc:MGI:1351631]	-
ENSMUSG00000087593	19.2536	8.16778	1.24847	0.0190143	0.476637	22.5255	19.8093	0.183999	0.589731	0.928568	12.2321	19.5358	-0.667214	0.323524	0.821343	18.1283	19.7168	-0.126538	0.723722	0.999695	Gm16174	7	19816553	19818625	+	402	antisense	predicted gene 16174 [Source:MGI Symbol;Acc:MGI:3801857]	-
ENSMUSG00000021322	17.8552	8.38347	1.09838	0.0189967	0.476637	28.4855	18.3788	0.634697	0.0518258	0.469991	14.106	18.1246	-0.356305	0.37187	0.84498	21.3337	18.2803	0.225242	0.590561	0.999695	Aoah	13	20794113	21036617	+	5925	protein_coding	acyloxyacyl hydrolase [Source:MGI Symbol;Acc:MGI:1350928]	-
ENSMUSG00000025491	28.3664	13.2068	1.10038	0.0191197	0.478684	82.6714	29.2142	1.50096	0.016054	0.267841	28.3884	28.7914	-0.0223217	0.96205	0.993264	49.1313	29.0541	0.758738	0.0792643	0.999695	Ifitm1	7	140967221	140969825	+	1094	protein_coding	interferon induced transmembrane protein 1 [Source:MGI Symbol;Acc:MGI:1915963]	-
ENSMUSG00000047986	28.5172	15.1789	0.906229	0.019151	0.47887	19.7103	29.3607	-0.576201	0.18227	0.716188	16.8578	28.9435	-0.770983	0.0521224	0.466985	22.8472	29.2046	-0.351483	0.255749	0.999695	Palm3	8	84021471	84030295	+	3612	protein_coding	paralemmin 3 [Source:MGI Symbol;Acc:MGI:1921587]	-
ENSMUSG00000034744	271.295	215.088	0.335271	0.0191793	0.478981	269.927	279.15	-0.0483528	0.727354	0.955714	240.133	275.33	-0.197273	0.114322	0.629674	288.67	277.764	0.0557864	0.66019	0.999695	Nagk	6	83794982	83804018	+	4676	protein_coding	N-acetylglucosamine kinase [Source:MGI Symbol;Acc:MGI:1860418]	-
ENSMUSG00000089711	7.65597	2.46122	1.61883	0.0192438	0.479998	0.963773	7.87511	-3.00798	0.000351602	0.0270337	2.72482	7.76994	-1.50533	0.0259208	0.329546	2.77114	7.83726	-1.498	0.0381953	1	Gm16240	10	76293165	76294860	+	614	antisense	predicted gene 16240 [Source:MGI Symbol;Acc:MGI:3801994]	-
ENSMUSG00000088139	13.5216	23.5631	-0.803064	0.0193855	0.482931	20.2946	13.9053	0.550484	0.111617	0.624361	15.8592	13.7229	0.203578	0.603541	0.926494	15.7627	13.8414	0.191903	0.60953	0.999695	Gm27343	2	152417262	152417324	+	63	snRNA	predicted gene, 27343 [Source:MGI Symbol;Acc:MGI:5530725]	-
ENSMUSG00000026989	176.855	118.435	0.577779	0.0194909	0.484734	193.897	181.948	0.0917443	0.678036	0.946983	119.156	179.473	-0.590546	0.00253667	0.076166	154.723	181.082	-0.227455	0.175304	0.999695	Dapl1	2	59484653	59505020	+	679	protein_coding	death associated protein-like 1 [Source:MGI Symbol;Acc:MGI:1923997]	-
ENSMUSG00000098222	2.76548	8.36752	-1.60096	0.019506	0.484734	6.1325	2.8451	1.11294	0.0953607	0.592739	3.79602	2.80761	0.43282	0.595708	0.923495	3.14845	2.83029	0.165672	0.826747	1	Gm8318	15	18163881	18164752	+	872	processed_pseudogene	predicted gene 8318 [Source:MGI Symbol;Acc:MGI:3646694]	-
ENSMUSG00000009378	36.7444	18.8348	0.966284	0.0195574	0.485411	42.2577	37.7541	0.160952	0.666908	0.944298	16.8216	37.2857	-1.1558	0.0309734	0.364251	47.6692	37.6032	0.340776	0.281108	0.999695	Slc16a12	19	34668403	34747289	-	4051	protein_coding	solute carrier family 16 (monocarboxylic acid transporters), member 12 [Source:MGI Symbol;Acc:MGI:2147716]	-
ENSMUSG00000071265	13.1273	5.78507	1.18406	0.0196515	0.48658	12.1433	13.5046	-0.15031	0.707429	0.953897	21.3422	13.3242	0.672338	0.0991407	0.602436	11.222	13.4374	-0.253983	0.495657	0.999695	1700086L19Rik	12	74284242	74295945	+	1075	transcribed_unitary_pseudogene	RIKEN cDNA 1700086L19 gene [Source:MGI Symbol;Acc:MGI:1921534]	-
ENSMUSG00000091155	128.465	32.0559	2.00192	0.019653	0.48658	71.3093	131.944	-0.887657	0.174484	0.705687	112.018	130.302	-0.21888	0.735778	0.95421	162.686	131.484	0.307043	0.675052	0.999695	Serpine3	14	62663667	62692243	+	1402	protein_coding	serpin peptidase inhibitor, clade E (nexin, plasminogen activator inhibitor type 1), member 3 [Source:MGI Symbol;Acc:MGI:2442020]	-
ENSMUSG00000047098	797.376	701.377	0.185174	0.0196962	0.487052	972.582	820.215	0.24557	0.0297298	0.366473	829.283	809.228	0.0357966	0.769463	0.961978	842.942	816.297	0.04563	0.527592	0.999695	Rnf31	14	55591708	55603693	+	5734	protein_coding	ring finger protein 31 [Source:MGI Symbol;Acc:MGI:1934704]	-
ENSMUSG00000042286	139.109	103.381	0.431138	0.0197578	0.487975	175.448	143.144	0.293587	0.0657314	0.517125	100.048	141.183	-0.496482	0.00869735	0.17477	140.855	142.427	-0.016643	0.918608	0.999695	Stab1	14	31139013	31168641	-	10288	protein_coding	stabilin 1 [Source:MGI Symbol;Acc:MGI:2178742]	-
ENSMUSG00000041168	1635.91	1353.23	0.27359	0.0197944	0.488279	1424.66	1683.17	-0.240551	0.00959415	0.204183	1357.56	1660.27	-0.290086	0.00115949	0.0419458	1552.32	1674.85	-0.109571	0.173947	0.999695	Lonp1	17	56614297	56626887	-	4374	protein_coding	lon peptidase 1, mitochondrial [Source:MGI Symbol;Acc:MGI:1921392]	-
ENSMUSG00000009596	6.88518	1.7772	1.96293	0.019838	0.488754	2.91891	7.0731	-1.26952	0.0934537	0.590507	4.11693	6.98686	-0.744334	0.305945	0.813629	3.15225	7.04516	-1.1539	0.0877426	1	Taf7l	X	134460118	134476490	-	2245	protein_coding	TATA-box binding protein associated factor 7 like [Source:MGI Symbol;Acc:MGI:1921719]	-
ENSMUSG00000020142	485.356	389.551	0.317615	0.0200155	0.489298	337.711	499.348	-0.563949	5.07803e-08	2.80691e-05	251.873	492.6	-0.965908	1.91073e-13	6.93593e-11	483.384	496.881	-0.0394749	0.607065	0.999695	Slc1a4	11	20302180	20332713	-	3926	protein_coding	solute carrier family 1 (glutamate/neutral amino acid transporter), member 4 [Source:MGI Symbol;Acc:MGI:2135601]	-
ENSMUSG00000019828	280.679	350.289	-0.319515	0.0199694	0.489298	296.042	288.672	0.0362597	0.803	0.968199	371.694	284.858	0.383273	0.00102404	0.0380941	294.21	287.309	0.0352997	0.708886	0.999695	Grm1	10	10686059	11082356	-	7648	protein_coding	glutamate receptor, metabotropic 1 [Source:MGI Symbol;Acc:MGI:1351338]	-
ENSMUSG00000029270	114.938	150.604	-0.389953	0.0199083	0.489298	143.993	118.213	0.284967	0.0642724	0.513075	146.932	116.648	0.3336	0.0130686	0.226769	133.998	117.654	0.188031	0.134295	0.999695	Fam69a	5	107908053	107987085	-	2892	protein_coding	family with sequence similarity 69, member A [Source:MGI Symbol;Acc:MGI:1914516]	-
ENSMUSG00000019850	4244.06	5007.47	-0.238687	0.0200155	0.489298	3759.52	4365.31	-0.215529	0.0489005	0.458411	4960.16	4307.36	0.203594	0.049367	0.455172	4500.6	4344.4	0.0509721	0.471071	0.999695	Tnfaip3	10	19000910	19015657	-	7226	protein_coding	tumor necrosis factor, alpha-induced protein 3 [Source:MGI Symbol;Acc:MGI:1196377]	-
ENSMUSG00000034595	340.65	248.073	0.456947	0.0200011	0.489298	335.712	350.558	-0.0620052	0.653046	0.942036	299.605	345.73	-0.204838	0.188682	0.72201	332.179	348.777	-0.0708618	0.533012	0.999695	Ppp1r18	17	35865593	35875596	+	4317	protein_coding	protein phosphatase 1, regulatory subunit 18 [Source:MGI Symbol;Acc:MGI:1923698]	-
ENSMUSG00000034652	16.7375	7.12549	1.23908	0.0200548	0.489298	19.7302	17.2236	0.202131	0.591484	0.928686	12.8788	16.9882	-0.393643	0.368905	0.844145	13.0745	17.1366	-0.386708	0.314943	0.999695	Cd300a	11	114890041	114904654	+	4738	protein_coding	CD300A molecule [Source:MGI Symbol;Acc:MGI:2443411]	-
ENSMUSG00000074480	115.306	85.5832	0.428246	0.0199297	0.489298	113.371	118.568	-0.0650965	0.694702	0.950695	125.508	117.019	0.098416	0.565191	0.914635	111.619	118.021	-0.0795179	0.708963	0.999695	Mex3a	3	88532395	88541396	+	5778	protein_coding	mex3 RNA binding family member A [Source:MGI Symbol;Acc:MGI:1919890]	-
ENSMUSG00000019795	1401.51	1594.67	-0.186368	0.0200365	0.489298	1422.72	1441.83	-0.0194855	0.769675	0.962683	1443.25	1422.37	0.0203599	0.75465	0.959331	1484.69	1434.81	0.049379	0.404573	0.999695	Pcmt1	10	7629373	7681136	-	4718	protein_coding	protein-L-isoaspartate (D-aspartate) O-methyltransferase 1 [Source:MGI Symbol;Acc:MGI:97502]	-
ENSMUSG00000026981	15.2854	4.23539	1.8507	0.0201862	0.490126	29.4914	15.7698	0.900209	0.155618	0.684304	8.37597	15.5173	-0.888251	0.206999	0.741671	17.4855	15.6645	0.156597	0.815179	0.999695	Il1rn	2	24336853	24351494	+	5535	protein_coding	interleukin 1 receptor antagonist [Source:MGI Symbol;Acc:MGI:96547]	-
ENSMUSG00000024352	58.1964	38.0559	0.608323	0.0201689	0.490126	46.1073	59.8381	-0.374745	0.089108	0.580209	51.6101	59.0663	-0.190219	0.441209	0.871763	49.4974	59.5611	-0.265903	0.229273	0.999695	Spata24	18	35656690	35662186	-	967	protein_coding	spermatogenesis associated 24 [Source:MGI Symbol;Acc:MGI:1918492]	-
ENSMUSG00000032418	2593.81	2990.82	-0.205429	0.020141	0.490126	2669.44	2668.05	0.000881245	0.989098	0.998767	2708.77	2632.45	0.0410226	0.508402	0.896323	2823.14	2655.23	0.0883832	0.173749	0.999695	Me1	9	86581371	86695953	-	3848	protein_coding	malic enzyme 1, NADP(+)-dependent, cytosolic [Source:MGI Symbol;Acc:MGI:97043]	-
ENSMUSG00000050786	3163.03	3694.2	-0.223883	0.0201509	0.490126	3108.54	3254.04	-0.0659297	0.302264	0.815614	3267.97	3210.13	0.0254211	0.689828	0.946893	3354.82	3238.17	0.0509712	0.342301	0.999695	Ccdc126	6	49319274	49341582	+	2421	protein_coding	coiled-coil domain containing 126 [Source:MGI Symbol;Acc:MGI:1889376]	-
ENSMUSG00000102545	32.8143	18.227	0.846596	0.020619	0.500029	26.1154	33.7297	-0.369831	0.179004	0.711974	26.9849	33.3009	-0.308874	0.392499	0.850871	29.3599	33.5816	-0.19167	0.488876	0.999695	6430573P05Rik	3	79287173	79289848	+	2610	lincRNA	RIKEN cDNA 6430573P05 gene [Source:MGI Symbol;Acc:MGI:2686494]	-
ENSMUSG00000074063	40.3282	24.2381	0.734233	0.0206601	0.500421	46.265	41.4861	0.156629	0.555469	0.918533	27.7385	40.9288	-0.560426	0.131941	0.658443	49.8849	41.287	0.271273	0.210617	0.999695	Osgin1	8	119434124	119446256	+	2674	protein_coding	oxidative stress induced growth inhibitor 1 [Source:MGI Symbol;Acc:MGI:1919089]	-
ENSMUSG00000002083	107.284	59.8647	0.839364	0.02076	0.500431	101.418	110.404	-0.122547	0.57651	0.924984	78.4889	108.871	-0.470777	0.0414805	0.419201	96.7193	109.857	-0.184985	0.33881	0.999695	Bbc3	7	16308393	16318205	+	2124	protein_coding	BCL2 binding component 3 [Source:MGI Symbol;Acc:MGI:2181667]	-
ENSMUSG00000108108	5.83044	1.52425	1.95201	0.0207196	0.500431	1.95116	5.99691	-1.61767	0.0489522	0.458411	3.35105	5.91696	-0.849047	0.2384	0.766851	3.16109	5.96922	-0.918671	0.1418	1	Gm44270	6	146762581	146763814	+	1234	TEC	predicted gene, 44270 [Source:MGI Symbol;Acc:MGI:5690662]	-
ENSMUSG00000022707	494.74	621.831	-0.329644	0.0207482	0.500431	580.129	508.932	0.188686	0.0704161	0.530052	525.58	502.096	0.0653575	0.47057	0.881672	543.253	506.493	0.101101	0.229607	0.999695	Gbe1	16	70313949	70569716	+	5352	protein_coding	glucan (1,4-alpha-), branching enzyme 1 [Source:MGI Symbol;Acc:MGI:1921435]	-
ENSMUSG00000024818	30.5837	18.5631	0.719618	0.0207236	0.500431	43.3098	31.4763	0.459678	0.135904	0.658961	30.3318	31.0411	-0.0268119	0.926662	0.989762	35.1218	31.3141	0.169444	0.505375	0.999695	Slc25a45	19	5877808	5885766	+	2650	protein_coding	solute carrier family 25, member 45 [Source:MGI Symbol;Acc:MGI:2147731]	-
ENSMUSG00000033061	106.257	147.578	-0.473811	0.0208212	0.500787	135.221	109.286	0.306628	0.0673103	0.521954	153.997	107.836	0.513455	0.00233124	0.0715784	117.71	108.773	0.112398	0.468301	0.999695	Resp18	1	75272199	75278415	-	1032	protein_coding	regulated endocrine-specific protein 18 [Source:MGI Symbol;Acc:MGI:1098222]	-
ENSMUSG00000010342	35.326	20.8423	0.754148	0.0208495	0.500787	31.4189	36.3325	-0.207819	0.449466	0.881265	26.963	35.8557	-0.411169	0.168499	0.700813	37.0543	36.1557	0.0372682	0.880588	0.999695	Tex14	11	87405065	87555823	+	5014	protein_coding	testis expressed gene 14 [Source:MGI Symbol;Acc:MGI:1933227]	-
ENSMUSG00000108322	12.4986	4.97301	1.32464	0.0208251	0.500787	9.68407	12.8707	-0.404394	0.441298	0.877619	8.5133	12.6875	-0.57975	0.246144	0.774461	7.46934	12.7991	-0.772443	0.103625	0.999695	5430431A17Rik	7	44484517	44485413	+	795	lincRNA	RIKEN cDNA 5430431A17 gene [Source:MGI Symbol;Acc:MGI:1918618]	-
ENSMUSG00000022952	43.8886	27.0671	0.702943	0.0208803	0.500929	52.1943	45.131	0.209028	0.412503	0.865921	39.8897	44.535	-0.153686	0.682345	0.945765	50.9453	44.9313	0.17986	0.442724	0.999695	Runx1	16	92601466	92826149	-	12025	protein_coding	runt related transcription factor 1 [Source:MGI Symbol;Acc:MGI:99852]	Runt
ENSMUSG00000021408	200.389	155.087	0.372272	0.0211845	0.507621	238.38	206.16	0.208094	0.185716	0.720434	184.894	203.373	-0.136019	0.412675	0.858237	218.376	205.15	0.0886938	0.426712	0.999695	Ripk1	13	34002363	34037147	+	8344	protein_coding	receptor (TNFRSF)-interacting serine-threonine kinase 1 [Source:MGI Symbol;Acc:MGI:108212]	-
ENSMUSG00000053475	38.4301	22.7491	0.761704	0.0212521	0.508229	30.2873	39.5327	-0.389926	0.132198	0.653086	20.7076	39.0037	-0.916223	0.00215503	0.0676445	32.9911	39.3401	-0.253503	0.278534	0.999695	Tnfaip6	2	52038009	52056686	+	1710	protein_coding	tumor necrosis factor alpha induced protein 6 [Source:MGI Symbol;Acc:MGI:1195266]	-
ENSMUSG00000031958	58.66	38.4425	0.604638	0.0212605	0.508229	57.7238	60.3521	-0.063874	0.729918	0.956017	64.3801	59.5317	0.111571	0.566072	0.914708	59.0723	60.0584	-0.0241676	0.892935	0.999695	Ldhd	8	111623785	111630374	-	5328	protein_coding	lactate dehydrogenase D [Source:MGI Symbol;Acc:MGI:106428]	-
ENSMUSG00000059552	350.697	290.504	0.271887	0.0213511	0.509788	324.302	360.767	-0.153194	0.0729175	0.538672	288.675	355.917	-0.301602	0.00596675	0.137898	353.377	359.02	-0.0226073	0.788089	0.999695	Trp53	11	69580359	69591873	+	4045	protein_coding	transformation related protein 53 [Source:MGI Symbol;Acc:MGI:98834]	P53
ENSMUSG00000027239	101.075	70.5072	0.519228	0.0214973	0.51267	109.956	104.002	0.0808924	0.690942	0.950494	61.5648	102.577	-0.738205	0.0001632	0.00860183	89.1396	103.489	-0.215111	0.209168	0.999695	Mdk	2	91929805	91932297	-	1324	protein_coding	midkine [Source:MGI Symbol;Acc:MGI:96949]	-
ENSMUSG00000050370	20.0944	9.36842	1.10752	0.0215278	0.512791	49.8767	20.6549	1.27037	0.00147334	0.065506	12.4465	20.3864	-0.704593	0.168274	0.700711	37.6357	20.5714	0.869737	0.0334696	0.999695	Ch25h	19	34473786	34475135	-	1350	protein_coding	cholesterol 25-hydroxylase [Source:MGI Symbol;Acc:MGI:1333869]	-
ENSMUSG00000025867	1890.41	2301.87	-0.284263	0.0216124	0.513643	2263.82	1944.12	0.219751	0.0133237	0.246222	2472.24	1918.49	0.365638	3.18458e-06	0.00031634	1920.03	1935.08	-0.0111271	0.905051	0.999695	Cplx2	13	54371349	54383917	+	4928	protein_coding	complexin 2 [Source:MGI Symbol;Acc:MGI:104726]	-
ENSMUSG00000032224	34.0703	51.109	-0.58509	0.0216147	0.513643	44.0476	35.0489	0.329001	0.196657	0.728189	46.6288	34.5746	0.430893	0.0922201	0.588802	38.481	34.8834	0.141322	0.566791	0.999695	Fam81a	9	70088511	70142560	-	4397	protein_coding	family with sequence similarity 81, member A [Source:MGI Symbol;Acc:MGI:1924136]	-
ENSMUSG00000019528	299.029	362.227	-0.27703	0.021708	0.515251	380.437	307.631	0.30619	0.000566423	0.037612	323.628	303.491	0.0931732	0.360018	0.840133	336.119	306.126	0.135295	0.148962	0.999695	Gyg	3	20122084	20155317	-	2344	protein_coding	glycogenin [Source:MGI Symbol;Acc:MGI:1351614]	-
ENSMUSG00000029126	792.731	929.457	-0.229692	0.0217768	0.516275	870.224	815.536	0.0936818	0.321858	0.827913	950.243	804.538	0.240442	0.00780295	0.163082	813.397	811.564	0.00347746	0.970931	0.999695	Nsg1	5	38137192	38159907	-	3215	protein_coding	neuron specific gene family member 1 [Source:MGI Symbol;Acc:MGI:109149]	-
ENSMUSG00000020638	216.385	306.6	-0.502274	0.0218263	0.516839	355.584	222.705	0.674613	0.000107974	0.0121335	281.957	219.619	0.361329	0.12654	0.650389	292.365	221.554	0.399513	0.00387614	0.683258	Cmpk2	12	26469204	26479837	+	4163	protein_coding	cytidine monophosphate (UMP-CMP) kinase 2, mitochondrial [Source:MGI Symbol;Acc:MGI:99830]	-
ENSMUSG00000020432	477.514	401.93	0.248123	0.0219355	0.518204	507.154	491.208	0.0467778	0.623077	0.938352	505.275	484.64	0.0617081	0.520655	0.897843	494.509	488.823	0.0170438	0.827806	0.999695	Tcn2	11	3917192	3932159	-	2178	protein_coding	transcobalamin 2 [Source:MGI Symbol;Acc:MGI:98534]	-
ENSMUSG00000004266	75.2134	51.7336	0.541969	0.0219218	0.518204	153.764	77.4205	0.989881	9.08481e-05	0.0105769	70.2312	76.3353	-0.117409	0.739654	0.955387	90.13	77.0179	0.225977	0.33511	0.999695	Ptpn6	6	124720707	124738714	-	2802	protein_coding	protein tyrosine phosphatase, non-receptor type 6 [Source:MGI Symbol;Acc:MGI:96055]	-
ENSMUSG00000047187	1865.34	2182.29	-0.22626	0.0220304	0.518616	2178	1918.97	0.182676	0.00209477	0.0822809	2099.96	1893.08	0.149337	0.0281882	0.34671	2028.31	1909.68	0.0869487	0.12315	0.999695	Rab2a	4	8535644	8607778	+	2133	protein_coding	RAB2A, member RAS oncogene family [Source:MGI Symbol;Acc:MGI:1928750]	-
ENSMUSG00000019647	822.938	645.021	0.351391	0.0220261	0.518616	635.917	846.242	-0.41222	0.000382969	0.0287959	719.336	835.188	-0.215012	0.0602397	0.499835	719.529	842.325	-0.226975	0.0437809	0.999695	Sema6a	18	47235598	47368870	-	8778	protein_coding	sema domain, transmembrane domain (TM), and cytoplasmic domain, (semaphorin) 6A [Source:MGI Symbol;Acc:MGI:1203727]	-
ENSMUSG00000024833	211.095	167.312	0.335778	0.022026	0.518616	219.422	217.239	0.0141569	0.921848	0.986327	186.675	214.247	-0.196422	0.337659	0.827335	231.693	216.132	0.0992314	0.441576	0.999695	Pola2	19	5940543	5964206	-	2872	protein_coding	polymerase (DNA directed), alpha 2 [Source:MGI Symbol;Acc:MGI:99690]	-
ENSMUSG00000032715	164.015	114.267	0.519837	0.0221216	0.51912	126.207	168.794	-0.419336	0.0126099	0.240129	106.986	166.466	-0.637392	0.000112969	0.00640425	156.491	167.931	-0.102718	0.445715	0.999695	Trib3	2	152337422	152344032	-	2125	protein_coding	tribbles pseudokinase 3 [Source:MGI Symbol;Acc:MGI:1345675]	-
ENSMUSG00000056917	452.483	353.947	0.353718	0.0221292	0.51912	452.876	465.629	-0.0396947	0.761921	0.9612	362.796	459.235	-0.340077	0.00242832	0.0736207	407.574	463.274	-0.184719	0.046277	0.999695	Sipa1	19	5651185	5663707	-	3868	protein_coding	signal-induced proliferation associated gene 1 [Source:MGI Symbol;Acc:MGI:107576]	-
ENSMUSG00000055421	778.239	977.197	-0.328254	0.0220907	0.51912	771.935	800.357	-0.0522365	0.671927	0.945514	861.025	789.819	0.124085	0.218935	0.754111	809.459	796.622	0.0233915	0.796732	0.999695	Pcdh9	14	93013410	93890679	-	6783	protein_coding	protocadherin 9 [Source:MGI Symbol;Acc:MGI:1306801]	-
ENSMUSG00000025586	475.188	400.111	0.24778	0.0223432	0.519962	466.764	488.717	-0.0661307	0.515555	0.90822	583.879	482.267	0.276936	0.0055813	0.132923	473.301	486.411	-0.0392449	0.640033	0.999695	Cpeb1	7	81347026	81455465	-	4192	protein_coding	cytoplasmic polyadenylation element binding protein 1 [Source:MGI Symbol;Acc:MGI:108442]	-
ENSMUSG00000056553	997.022	1172.08	-0.233536	0.0222867	0.519962	1028.51	1025.39	0.00435516	0.970392	0.995206	1175.09	1011.86	0.215757	0.0442769	0.43157	943.788	1020.57	-0.112595	0.156808	0.999695	Ptprn2	12	116485720	117276849	+	8602	protein_coding	protein tyrosine phosphatase, receptor type, N polypeptide 2 [Source:MGI Symbol;Acc:MGI:107418]	-
ENSMUSG00000110652	10.694	4.28442	1.32683	0.0223462	0.519962	6.61766	11.0102	-0.730504	0.118848	0.635411	6.3709	10.8531	-0.760551	0.161912	0.692411	3.93376	10.9516	-1.47404	0.00735906	1	Gm33023	8	104630832	104636492	+	1681	antisense	predicted gene, 33023 [Source:MGI Symbol;Acc:MGI:5592182]	-
ENSMUSG00000027692	1586.07	1314.05	0.271594	0.0222239	0.519962	1325.06	1630.88	-0.299798	0.00639026	0.162151	1542.85	1609.57	-0.0611043	0.538208	0.903979	1553.01	1623.49	-0.0639626	0.454905	0.999695	Tnik	3	28263214	28675858	+	19282	protein_coding	TRAF2 and NCK interacting kinase [Source:MGI Symbol;Acc:MGI:1916264]	-
ENSMUSG00000029064	63158.7	73228.5	-0.21342	0.0222868	0.519962	61160.8	64973.4	-0.0872392	0.192382	0.724897	65553.4	64100.5	0.0323288	0.555097	0.910987	66602.9	64657	0.0427753	0.373239	0.999695	Gnb1	4	155491361	155559269	+	4268	protein_coding	guanine nucleotide binding protein (G protein), beta 1 [Source:MGI Symbol;Acc:MGI:95781]	-
ENSMUSG00000068240	84.6385	49.0747	0.785634	0.0222551	0.519962	113.214	87.0466	0.378846	0.238068	0.763818	93.7455	85.9043	0.125057	0.697988	0.948054	54.2311	86.6381	-0.676562	0.0176683	0.999695	Gm11808	4	3973092	3973595	-	504	protein_coding	predicted gene 11808 [Source:MGI Symbol;Acc:MGI:3649356]	-
ENSMUSG00000028261	487.032	592.548	-0.282379	0.0223075	0.519962	540.9	500.969	0.110363	0.192741	0.724897	502.311	494.272	0.0224865	0.768672	0.961978	517.634	498.584	0.0540763	0.420648	0.999695	Ndufaf4	4	24898083	24905001	+	3902	protein_coding	NADH:ubiquinone oxidoreductase complex assembly factor 4 [Source:MGI Symbol;Acc:MGI:1915743]	-
ENSMUSG00000060913	10.0017	3.76638	1.40907	0.0224068	0.52077	11.4182	10.2873	0.15098	0.735146	0.95696	5.89432	10.1518	-0.77353	0.168586	0.700813	7.11234	10.2369	-0.521388	0.239562	1	Trim55	3	19644474	19692421	+	2659	protein_coding	tripartite motif-containing 55 [Source:MGI Symbol;Acc:MGI:3036269]	-
ENSMUSG00000092203	111.459	82.0882	0.439246	0.0224662	0.521548	133.499	114.639	0.22003	0.216728	0.748243	103.281	113.112	-0.13261	0.429168	0.866732	134.286	114.104	0.23531	0.127351	0.999695	1110038B12Rik	17	34950238	34952471	-	1811	processed_transcript	RIKEN cDNA 1110038B12 gene [Source:MGI Symbol;Acc:MGI:1916013]	-
ENSMUSG00000017561	1204.78	1383.54	-0.199815	0.022685	0.52602	1274.39	1239.44	0.0398846	0.619142	0.937851	1358.24	1222.71	0.150877	0.0349903	0.388106	1260.82	1233.41	0.0319121	0.621324	0.999695	Crlf3	11	80046493	80080991	-	4261	protein_coding	cytokine receptor-like factor 3 [Source:MGI Symbol;Acc:MGI:1860086]	-
ENSMUSG00000108358	106.647	145.355	-0.449088	0.0227566	0.527071	129.012	109.739	0.235412	0.16637	0.696824	121.716	108.252	0.170164	0.361347	0.840554	120.63	109.176	0.146341	0.388475	0.999695	Gm44509	7	55973519	55974842	-	1324	TEC	predicted gene 44509 [Source:MGI Symbol;Acc:MGI:5753085]	-
ENSMUSG00000032323	1.95724	6.41895	-1.7222	0.0227859	0.527143	8.94295	2.01526	2.15709	0.00123482	0.0589914	4.95829	1.98656	1.32325	0.0897917	0.583555	4.19541	2.00426	1.06198	0.161451	1	Cyp11a1	9	58006411	58027023	+	4804	protein_coding	cytochrome P450, family 11, subfamily a, polypeptide 1 [Source:MGI Symbol;Acc:MGI:88582]	-
ENSMUSG00000097504	502.118	391.67	0.35813	0.0229758	0.530925	470.608	516.746	-0.134963	0.259479	0.785063	399.474	509.602	-0.350861	0.0110416	0.20286	463.222	514.116	-0.150537	0.241096	0.999695	4930516B21Rik	9	119440278	119444830	-	1195	lincRNA	RIKEN cDNA 4930516B21 gene [Source:MGI Symbol;Acc:MGI:1922364]	-
ENSMUSG00000116958	7.5959	15.0619	-0.983849	0.0230071	0.531038	11.9728	7.81356	0.613834	0.205886	0.736795	7.0209	7.70876	-0.142155	0.793463	0.96529	11.0868	7.77671	0.509228	0.236092	1	AC115797.5	17	16847395	16848079	+	685	processed_pseudogene	lysosomal-associated protein transmembrane 4B (Laptm4b), pseudogene	-
ENSMUSG00000109509	5.10178	11.6575	-1.20038	0.0230369	0.531118	4.51774	5.25194	-0.215146	0.748652	0.959345	3.2014	5.17826	-0.683159	0.334501	0.826556	7.36915	5.22371	0.496044	0.354768	1	Rps12-ps4	7	30484701	30485097	-	397	processed_pseudogene	ribosomal protein S12, pseudogene 4 [Source:MGI Symbol;Acc:MGI:3780139]	-
ENSMUSG00000000184	163.165	110.594	0.563643	0.0231964	0.53296	207.125	167.797	0.303244	0.176376	0.707856	93.6719	165.58	-0.82338	0.000145933	0.00787616	189.515	167.029	0.182045	0.18028	0.999695	Ccnd2	6	127125162	127152193	-	9409	protein_coding	cyclin D2 [Source:MGI Symbol;Acc:MGI:88314]	-
ENSMUSG00000015202	205.421	165.956	0.307104	0.0231592	0.53296	171.366	211.296	-0.30316	0.00745835	0.177577	175.788	208.47	-0.246051	0.0372955	0.402191	183.374	210.293	-0.197475	0.051484	0.999695	Cnksr3	10	7119063	7212237	-	3837	protein_coding	Cnksr family member 3 [Source:MGI Symbol;Acc:MGI:2674130]	-
ENSMUSG00000028037	24.151	46.0495	-0.928232	0.023184	0.53296	68.3423	24.8618	1.45685	2.27807e-05	0.00408694	39.6217	24.5093	0.694534	0.187217	0.720399	56.9269	24.7336	1.20077	6.88857e-05	0.0445231	Ifi44	3	151730922	151749960	-	6129	protein_coding	interferon-induced protein 44 [Source:MGI Symbol;Acc:MGI:2443016]	-
ENSMUSG00000022797	2161.62	2633.12	-0.284549	0.0233229	0.535122	2085.75	2222.86	-0.0920121	0.353546	0.842644	2628.51	2193.68	0.260917	0.00308512	0.0869008	2455.75	2212.68	0.150416	0.039043	0.999695	Tfrc	16	32608920	32632794	+	6185	protein_coding	transferrin receptor [Source:MGI Symbol;Acc:MGI:98822]	-
ENSMUSG00000032336	3258.28	3660.05	-0.167752	0.0233437	0.535122	3519.7	3351.75	0.0705504	0.392116	0.861981	3653.42	3306.8	0.143574	0.00689744	0.151006	3366.87	3335.58	0.0133804	0.801014	0.999695	Nptn	9	58582240	58657955	+	6168	protein_coding	neuroplastin [Source:MGI Symbol;Acc:MGI:108077]	-
ENSMUSG00000031960	3777.39	3264.68	0.210527	0.0233783	0.535304	3339.18	3886.3	-0.218882	0.0304128	0.370199	2926.85	3833.69	-0.389143	9.4262e-05	0.00551029	3641.13	3867.15	-0.0869038	0.132892	0.999695	Aars	8	111033144	111057664	+	9282	protein_coding	alanyl-tRNA synthetase [Source:MGI Symbol;Acc:MGI:2384560]	-
ENSMUSG00000027765	74.7527	106.048	-0.502605	0.0237545	0.537804	98.4563	76.8776	0.355127	0.0527291	0.471315	148.267	75.8606	0.963274	5.4254e-06	0.000498384	82.9691	76.5193	0.116172	0.543808	0.999695	P2ry1	3	61002795	61008982	+	4291	protein_coding	purinergic receptor P2Y, G-protein coupled 1 [Source:MGI Symbol;Acc:MGI:105049]	-
ENSMUSG00000116056	48.5208	32.492	0.578451	0.023591	0.537804	60.8524	49.9344	0.284184	0.195209	0.726325	16.0204	49.2473	-1.62472	5.69625e-06	0.000516934	48.9289	49.6772	-0.0249562	0.917098	0.999695	Gm4544	15	102657111	102660468	+	1360	lincRNA	predicted gene 4544 [Source:MGI Symbol;Acc:MGI:3782728]	-
ENSMUSG00000028708	601.399	507.684	0.244188	0.0237101	0.537804	593.122	618.597	-0.0611223	0.475619	0.892917	491.766	610.31	-0.311098	0.000895338	0.0343279	542.239	615.68	-0.183788	0.0208214	0.999695	Mknk1	4	115839198	115879250	+	4502	protein_coding	MAP kinase-interacting serine/threonine kinase 1 [Source:MGI Symbol;Acc:MGI:894316]	-
ENSMUSG00000001672	307.81	238.634	0.368373	0.0237168	0.537804	288.928	316.746	-0.133264	0.322176	0.827913	240.457	312.392	-0.376652	0.00716734	0.154806	272.273	315.164	-0.211213	0.0554144	0.999695	Marveld3	8	109947914	109962203	-	3284	protein_coding	MARVEL (membrane-associating) domain containing 3 [Source:MGI Symbol;Acc:MGI:1920858]	-
ENSMUSG00000032878	302.543	367.787	-0.280742	0.0237213	0.537804	336.066	311.29	0.109932	0.252338	0.776488	370.425	307.054	0.269889	0.0132643	0.228756	320.944	309.745	0.0513338	0.613366	0.999695	Ccdc85a	11	28385685	28584324	-	6971	protein_coding	coiled-coil domain containing 85A [Source:MGI Symbol;Acc:MGI:2445069]	-
ENSMUSG00000027180	1445.29	1633.75	-0.176685	0.023755	0.537804	1474.15	1486.63	-0.012318	0.859813	0.977424	1607.27	1466.79	0.131548	0.0152875	0.247499	1516.66	1479.54	0.0357465	0.431968	0.999695	Fbxo3	2	104027721	104063240	+	7237	protein_coding	F-box protein 3 [Source:MGI Symbol;Acc:MGI:1929084]	-
ENSMUSG00000055022	1657.75	2079.18	-0.32666	0.0236099	0.537804	1727.28	1705.18	0.0185503	0.831068	0.97286	1813.2	1682.44	0.107521	0.177304	0.708707	1734.69	1697.01	0.0319841	0.54283	0.999695	Cntn1	15	92051165	92341967	+	9433	protein_coding	contactin 1 [Source:MGI Symbol;Acc:MGI:105980]	-
ENSMUSG00000082100	7.8352	16.0737	-1.03717	0.0235468	0.537804	8.78233	8.05145	0.129115	0.806211	0.968199	10.3324	7.95028	0.385376	0.46064	0.878498	9.59952	8.01847	0.266471	0.590374	1	Glns-ps1	11	19720355	19721472	+	1118	processed_pseudogene	glutamine synthetase pseudogene 1 [Source:MGI Symbol;Acc:MGI:95740]	-
ENSMUSG00000021972	1138.05	1008.94	0.173899	0.0236005	0.537804	1078.29	1170.56	-0.118549	0.235271	0.762308	1129.1	1155	-0.0328972	0.641803	0.935218	1098.88	1164.99	-0.0844853	0.191682	0.999695	Hmbox1	14	64811600	64949871	-	9681	protein_coding	homeobox containing 1 [Source:MGI Symbol;Acc:MGI:2445066]	Homeobox
ENSMUSG00000013275	1154.94	1007.52	0.19702	0.0236635	0.537804	1238.5	1187.84	0.0599853	0.517827	0.90822	1159.53	1172.08	-0.0150392	0.863258	0.977663	1174.72	1182.29	-0.00928961	0.897959	0.999695	Slc41a1	1	131827493	131848865	+	4912	protein_coding	solute carrier family 41, member 1 [Source:MGI Symbol;Acc:MGI:2444823]	-
ENSMUSG00000112242	11.6034	4.79261	1.27806	0.0238762	0.539908	5.62391	11.937	-1.07389	0.0336961	0.388442	6.15366	11.7774	-0.925275	0.0749783	0.545222	8.45264	11.8771	-0.482103	0.270116	0.999695	Gm10747	10	117043746	117045101	+	1014	lincRNA	predicted gene 10747 [Source:MGI Symbol;Acc:MGI:3641810]	-
ENSMUSG00000006818	1971.74	2190.28	-0.151584	0.0239016	0.539908	1995.3	2028.12	-0.0237344	0.674681	0.946064	2014.29	2001.07	0.00937379	0.858133	0.976558	2010.61	2018.46	-0.00560807	0.896577	0.999695	Sod2	17	13006846	13040063	+	10008	protein_coding	superoxide dismutase 2, mitochondrial [Source:MGI Symbol;Acc:MGI:98352]	-
ENSMUSG00000029651	1112.32	1301.43	-0.226437	0.0239623	0.54067	1096.67	1144.01	-0.0610539	0.541687	0.916572	1200.06	1128.84	0.0879378	0.318306	0.819133	1114.1	1138.64	-0.0311896	0.648889	0.999695	Mtus2	5	147957320	148316065	+	12874	protein_coding	microtubule associated tumor suppressor candidate 2 [Source:MGI Symbol;Acc:MGI:1915388]	-
ENSMUSG00000058812	6.10462	1.71603	1.80609	0.0240055	0.54104	1.57994	6.27979	-1.99287	0.00798677	0.185087	2.91944	6.19645	-1.06278	0.129747	0.654946	5.50417	6.24848	-0.176617	0.798464	1	0610039K10Rik	2	163644850	163645801	+	952	antisense	RIKEN cDNA 0610039K10 gene [Source:MGI Symbol;Acc:MGI:1915636]	-
ENSMUSG00000051391	5445.42	4905.51	0.150588	0.024083	0.542178	4654.45	5602	-0.267333	7.68609e-06	0.00187424	5113.03	5526.47	-0.112033	0.118714	0.636202	5232.25	5574.77	-0.0914163	0.107541	0.999695	Ywhag	5	135908409	135934616	-	5500	protein_coding	tyrosine 3-monooxygenase/tryptophan 5-monooxygenase activation protein, gamma polypeptide [Source:MGI Symbol;Acc:MGI:108109]	-
ENSMUSG00000030302	1724.04	2078.74	-0.269903	0.0242626	0.54441	1686.74	1772.84	-0.0718231	0.50666	0.905164	2107.65	1749.63	0.268613	0.0040526	0.106056	1693.21	1764.72	-0.0596717	0.522389	0.999695	Atp2b2	6	113743831	114042613	-	12612	protein_coding	ATPase, Ca++ transporting, plasma membrane 2 [Source:MGI Symbol;Acc:MGI:105368]	-
ENSMUSG00000033610	88.3813	115.65	-0.386771	0.0242634	0.54441	89.648	90.929	-0.0197732	0.90875	0.983416	105.936	89.7008	0.236987	0.143963	0.67225	98.5732	90.4787	0.124112	0.442924	0.999695	Pank1	19	34810894	34879455	-	3692	protein_coding	pantothenate kinase 1 [Source:MGI Symbol;Acc:MGI:1922985]	-
ENSMUSG00000042524	564.827	461.117	0.292069	0.0242178	0.54441	572.791	581.138	-0.0205523	0.851197	0.97633	553.829	573.251	-0.0493218	0.621523	0.930149	574.074	578.26	-0.0103503	0.900662	0.999695	Sun2	15	79724070	79742536	-	5420	protein_coding	Sad1 and UNC84 domain containing 2 [Source:MGI Symbol;Acc:MGI:2443011]	-
ENSMUSG00000040289	177.466	219.238	-0.304041	0.0243156	0.544973	175.148	182.581	-0.0610654	0.663864	0.943264	181.213	180.102	0.00911879	0.947466	0.992355	204.439	181.692	0.168557	0.157331	0.999695	Hey1	3	8663359	8667256	-	3265	protein_coding	hairy/enhancer-of-split related with YRPW motif 1 [Source:MGI Symbol;Acc:MGI:1341800]	bHLH
ENSMUSG00000022026	128.743	161.508	-0.326353	0.0243643	0.545456	149.358	132.423	0.172704	0.323642	0.828184	132.46	130.65	0.015517	0.926869	0.989803	131.283	131.801	-0.00766459	0.950927	0.999695	Olfm4	14	79984081	80023139	+	2962	protein_coding	olfactomedin 4 [Source:MGI Symbol;Acc:MGI:2685142]	-
ENSMUSG00000087138	87.2697	66.3765	0.395206	0.0244052	0.545765	76.4712	89.7684	-0.229855	0.192983	0.724897	55.8981	88.5696	-0.666653	0.000214983	0.0108793	73.0089	89.3351	-0.291259	0.0489764	0.999695	Gm15545	7	44986900	44994597	+	1976	antisense	predicted gene 15545 [Source:MGI Symbol;Acc:MGI:3782994]	-
ENSMUSG00000032202	210.176	157.489	0.41688	0.0245528	0.546323	199.32	216.11	-0.116706	0.451445	0.882355	180.458	213.27	-0.241855	0.161475	0.69218	178.344	215.149	-0.271553	0.13345	0.999695	Rab27a	9	73044854	73097629	+	3879	protein_coding	RAB27A, member RAS oncogene family [Source:MGI Symbol;Acc:MGI:1861441]	-
ENSMUSG00000054889	13.0726	3.2821	1.9954	0.0245224	0.546323	7.33405	13.4281	-0.873262	0.222172	0.753649	48.0028	13.2667	1.8545	0.191641	0.725127	5.3492	13.3726	-1.31984	0.0753044	1	Dsp	13	38151294	38198577	+	9659	protein_coding	desmoplakin [Source:MGI Symbol;Acc:MGI:109611]	-
ENSMUSG00000049252	151.842	203.633	-0.422495	0.0245788	0.546323	139.959	156.113	-0.15885	0.482817	0.89549	179.115	154.094	0.215135	0.199508	0.733675	146.217	155.417	-0.0876373	0.666247	0.999695	Lrp1b	2	40595246	42653624	-	23774	protein_coding	low density lipoprotein-related protein 1B (deleted in tumors) [Source:MGI Symbol;Acc:MGI:2151136]	-
ENSMUSG00000028532	173.59	215.027	-0.309269	0.0245932	0.546323	184.775	178.516	0.0501638	0.671171	0.945243	197.531	176.173	0.164788	0.217419	0.752662	158.885	177.685	-0.160887	0.199424	0.999695	Cachd1	4	100776675	101029220	+	6020	protein_coding	cache domain containing 1 [Source:MGI Symbol;Acc:MGI:2444177]	-
ENSMUSG00000021536	847.742	996.933	-0.233831	0.024586	0.546323	902.358	872.06	0.0492038	0.57524	0.924816	892.09	860.386	0.0525237	0.440282	0.871727	798.244	867.828	-0.119897	0.0737288	0.999695	Adcy2	13	68620043	68999541	-	4211	protein_coding	adenylate cyclase 2 [Source:MGI Symbol;Acc:MGI:99676]	-
ENSMUSG00000040751	47.2164	28.5679	0.726833	0.0244689	0.546323	50.3202	48.5967	0.0492321	0.846727	0.975556	42.1084	47.9153	-0.186616	0.601866	0.926194	44.8388	48.3515	-0.109953	0.668917	0.999695	Lat2	5	134600022	134615025	-	2621	protein_coding	linker for activation of T cells family, member 2 [Source:MGI Symbol;Acc:MGI:1926479]	-
ENSMUSG00000057246	88.2383	63.5631	0.472347	0.0246732	0.547086	71.2116	90.7648	-0.349053	0.0385274	0.414407	66.8861	89.5492	-0.418032	0.0263934	0.332965	69.7036	90.3302	-0.373448	0.0252159	0.999695	BC051142	17	34398820	34460734	+	3418	protein_coding	cDNA sequence BC051142 [Source:MGI Symbol;Acc:MGI:3039565]	-
ENSMUSG00000028176	22.0999	35.4407	-0.680433	0.024682	0.547086	29.6515	22.7189	0.38417	0.163827	0.692987	33.2807	22.4253	0.564141	0.0792674	0.555242	20.4193	22.6217	-0.148182	0.60713	0.999695	Lrrc7	3	158082891	158562221	-	9816	protein_coding	leucine rich repeat containing 7 [Source:MGI Symbol;Acc:MGI:2676665]	-
ENSMUSG00000005268	4.23033	12.0457	-1.49943	0.0247605	0.547176	8.3639	4.35039	0.9366	0.140529	0.66698	11.5047	4.29267	1.40861	0.0197365	0.286389	5.97629	4.33046	0.451441	0.484393	1	Prlr	15	10177238	10349180	+	15339	protein_coding	prolactin receptor [Source:MGI Symbol;Acc:MGI:97763]	-
ENSMUSG00000078905	5.71641	13.1838	-1.20676	0.0247673	0.547176	4.13131	5.87938	-0.505634	0.416113	0.8678	4.36699	5.80253	-0.389206	0.573345	0.917083	5.3858	5.85046	-0.118914	0.844994	1	Gm14393	2	175061549	175067781	-	937	protein_coding	predicted gene 14393 [Source:MGI Symbol;Acc:MGI:3649576]	zf-C2H2
ENSMUSG00000004105	77.8734	53.4809	0.544647	0.0247677	0.547176	81.4463	80.0707	0.0269452	0.889276	0.98088	78.4931	79.0256	-0.0112136	0.958188	0.993021	95.2293	79.7121	0.258189	0.12858	0.999695	Angptl2	2	33216069	33247717	+	6286	protein_coding	angiopoietin-like 2 [Source:MGI Symbol;Acc:MGI:1347002]	-
ENSMUSG00000029467	4863.65	5835.25	-0.262709	0.0248699	0.54883	4845.7	5001.66	-0.0457283	0.691801	0.950685	5548.85	4935.88	0.168758	0.0484	0.453304	4823.14	4978.53	-0.0457519	0.508357	0.999695	Atp2a2	5	122453513	122502225	-	6081	protein_coding	ATPase, Ca++ transporting, cardiac muscle, slow twitch 2 [Source:MGI Symbol;Acc:MGI:88110]	-
ENSMUSG00000054455	1958.01	2173.39	-0.150564	0.0249939	0.550358	1955.01	2014.09	-0.0429386	0.446922	0.880873	1891.85	1987.11	-0.0714341	0.292174	0.805308	1984.53	2004.47	-0.0145267	0.75886	0.999695	Vapb	2	173737511	173784336	+	7131	protein_coding	vesicle-associated membrane protein, associated protein B and C [Source:MGI Symbol;Acc:MGI:1928744]	-
ENSMUSG00000056124	872.436	1069.42	-0.29358	0.0249736	0.550358	884.011	897.369	-0.0217952	0.838203	0.974159	918.099	885.396	0.0514711	0.67918	0.9452	905.097	893.117	0.0196576	0.804809	0.999695	B4galt6	18	20684599	20746404	-	5808	protein_coding	UDP-Gal:betaGlcNAc beta 1,4-galactosyltransferase, polypeptide 6 [Source:MGI Symbol;Acc:MGI:1928380]	-
ENSMUSG00000031696	1863.34	2207.41	-0.244333	0.0250706	0.551444	1943.3	1916.54	0.0198951	0.798045	0.967931	1993.94	1891.05	0.0759872	0.251237	0.779908	1973.97	1907.46	0.049495	0.30065	0.999695	Vps35	8	85260392	85299802	-	8899	protein_coding	VPS35 retromer complex component [Source:MGI Symbol;Acc:MGI:1890467]	-
ENSMUSG00000034187	7477.85	8249.76	-0.141742	0.0251504	0.552594	7695.54	7691.69	0.000694622	0.992078	0.998935	8206.36	7588.97	0.112747	0.0223222	0.303189	7645.01	7655.13	-0.00198111	0.958801	0.999695	Nsf	11	103821782	103954056	-	8346	protein_coding	N-ethylmaleimide sensitive fusion protein [Source:MGI Symbol;Acc:MGI:104560]	-
ENSMUSG00000084843	2.3472	7.17745	-1.61888	0.02519	0.552614	9.36159	2.4161	1.95873	0.00222091	0.0842708	6.27753	2.38211	1.41147	0.0772631	0.550286	1.7982	2.40385	-0.424726	0.642048	1	B230312C02Rik	2	180370491	180385885	-	1703	lincRNA	RIKEN cDNA B230312C02 gene [Source:MGI Symbol;Acc:MGI:2444130]	-
ENSMUSG00000074715	30.839	17.8706	0.787962	0.0252063	0.552614	27.108	31.713	-0.225294	0.575644	0.92494	28.2972	31.3004	-0.146441	0.620817	0.930149	33.1564	31.5635	0.0753106	0.779367	0.999695	Ccl28	13	119623819	119654359	+	4844	protein_coding	chemokine (C-C motif) ligand 28 [Source:MGI Symbol;Acc:MGI:1861731]	-
ENSMUSG00000085204	37.4578	24.696	0.599003	0.0252566	0.553114	36.1855	38.5417	-0.093203	0.666426	0.944298	28.3349	38.017	-0.41512	0.168962	0.701986	34.8306	38.3485	-0.139461	0.54093	0.999695	Gm15327	13	111809141	111811039	+	752	processed_transcript	predicted gene 15327 [Source:MGI Symbol;Acc:MGI:3705295]	-
ENSMUSG00000085256	8.64141	2.70542	1.65996	0.0253916	0.555466	5.5286	8.90239	-0.687917	0.203259	0.735501	5.03718	8.77324	-0.806423	0.17824	0.709801	4.14717	8.84914	-1.08846	0.0496125	1	Dmrta2os	4	109976738	109977813	-	848	antisense	doublesex and mab-3 related transcription factor like family A2, opposite strand [Source:MGI Symbol;Acc:MGI:1924703]	-
ENSMUSG00000022893	782.33	519.19	0.591975	0.0254534	0.556211	856.938	804.674	0.0904972	0.671172	0.945243	770.832	793.916	-0.042138	0.797721	0.9661	844.639	800.902	0.0766929	0.527259	0.999695	Adamts1	16	85793827	85803113	-	5302	protein_coding	a disintegrin-like and metallopeptidase (reprolysin type) with thrombospondin type 1 motif, 1 [Source:MGI Symbol;Acc:MGI:109249]	-
ENSMUSG00000032491	43.1299	27.31	0.654973	0.0255656	0.556849	50.7184	44.403	0.192673	0.423462	0.870843	26.7625	43.7749	-0.708083	0.0129626	0.226152	42.7019	44.1663	-0.0483996	0.840156	0.999695	Nradd	9	110621135	110624452	-	1817	protein_coding	neurotrophin receptor associated death domain [Source:MGI Symbol;Acc:MGI:1914419]	-
ENSMUSG00000031565	785.45	639.868	0.29622	0.025558	0.556849	765.947	807.916	-0.0771696	0.534042	0.915527	670.301	797.092	-0.249334	0.0495789	0.456183	836.862	804.11	0.057262	0.491502	0.999695	Fgfr1	8	25513654	25575718	+	9875	protein_coding	fibroblast growth factor receptor 1 [Source:MGI Symbol;Acc:MGI:95522]	-
ENSMUSG00000052056	136.951	106.511	0.365134	0.0255179	0.556849	143.98	140.86	0.0318362	0.794893	0.967018	126.792	138.985	-0.131088	0.344307	0.830914	136.536	140.193	-0.0386463	0.777013	0.999695	Zfp217	2	170108643	170148103	-	6139	protein_coding	zinc finger protein 217 [Source:MGI Symbol;Acc:MGI:2685408]	zf-C2H2
ENSMUSG00000028441	12.285	5.5025	1.15867	0.0256013	0.557023	12.6679	12.6536	0.00533777	0.989549	0.998877	15.29	12.4699	0.297731	0.484805	0.886659	10.2648	12.5815	-0.29261	0.470524	0.999695	1110017D15Rik	4	41505009	41517333	-	1421	protein_coding	RIKEN cDNA 1110017D15 gene [Source:MGI Symbol;Acc:MGI:1920971]	-
ENSMUSG00000020657	1629.92	1859.16	-0.189754	0.0256294	0.55703	1598.08	1676.26	-0.0690104	0.455227	0.884892	1812.65	1654.12	0.131896	0.14277	0.671269	1670.14	1668.47	0.00149003	0.98262	0.999695	Dnajc27	12	4082583	4110606	+	5088	protein_coding	DnaJ heat shock protein family (Hsp40) member C27 [Source:MGI Symbol;Acc:MGI:2443036]	-
ENSMUSG00000096841	9.0255	18.201	-1.01096	0.0257133	0.557648	11.9183	9.27872	0.357063	0.424487	0.871093	17.5914	9.15988	0.939814	0.0389569	0.409	13.506	9.23749	0.549107	0.159018	0.999695	Gm25596	10	29349585	29349691	+	107	snRNA	predicted gene, 25596 [Source:MGI Symbol;Acc:MGI:5455373]	-
ENSMUSG00000043831	367.135	424.972	-0.211567	0.0256907	0.557648	396.966	377.62	0.0724075	0.37196	0.850972	387.267	372.593	0.0554797	0.510818	0.896768	403.362	375.829	0.102608	0.189649	0.999695	Lysmd4	7	67222544	67307330	+	5121	protein_coding	LysM, putative peptidoglycan-binding, domain containing 4 [Source:MGI Symbol;Acc:MGI:1922349]	-
ENSMUSG00000041216	50.8679	72.1155	-0.505641	0.0257578	0.558011	53.1125	52.2909	0.0231964	0.930928	0.988594	54.8193	51.6203	0.0830463	0.749257	0.958385	54.3175	52.0632	0.061082	0.775246	0.999695	Clvs1	4	9269293	9451691	+	7566	protein_coding	clavesin 1 [Source:MGI Symbol;Acc:MGI:1921688]	-
ENSMUSG00000022010	3114.63	3498.35	-0.167507	0.0258183	0.55872	3766.83	3203.94	0.233492	0.014358	0.254022	3408.1	3160.89	0.10858	0.156881	0.686386	3426.92	3188.61	0.103921	0.100691	0.999695	Tsc22d1	14	76414961	76507765	+	8994	protein_coding	TSC22 domain family, member 1 [Source:MGI Symbol;Acc:MGI:109127]	TSC22
ENSMUSG00000089235	33.9705	18.143	0.903223	0.0259853	0.56173	29.9634	34.9892	-0.224616	0.495338	0.900978	18.6168	34.4785	-0.895242	0.0347897	0.387519	23.3189	34.7943	-0.578719	0.0696753	0.999695	Gm23119	18	74778561	74778700	-	140	scaRNA	predicted gene, 23119 [Source:MGI Symbol;Acc:MGI:5452896]	-
ENSMUSG00000051116	87.4033	142.696	-0.705489	0.026032	0.562134	95.7437	89.9176	0.0911172	0.739059	0.957454	84.2157	88.7081	-0.0772072	0.713879	0.950955	90.3948	89.4729	0.0137843	0.957221	0.999695	Gm8121	5	57608569	57609067	+	499	processed_pseudogene	predicted pseudogene 8121 [Source:MGI Symbol;Acc:MGI:3645325]	-
ENSMUSG00000030144	6.82551	1.50829	2.18137	0.0261197	0.563423	9.87897	7.04396	0.486941	0.524809	0.910688	1.03869	6.93061	-2.77765	0.00930406	0.182402	7.31618	6.99378	0.0651182	0.933408	1	Clec4d	6	123262111	123275265	+	1599	protein_coding	C-type lectin domain family 4, member d [Source:MGI Symbol;Acc:MGI:1298389]	-
ENSMUSG00000095737	347.218	44.0168	2.97897	0.0262929	0.566049	181.521	358.179	-0.980437	0.462015	0.88723	12.6349	352.663	-4.80125	0.00667968	0.148257	35.681	355.628	-3.31657	0.000931774	0.292011	Igkv11-125	6	67913573	67914052	+	353	IG_V_gene	immunoglobulin kappa variable 11-125 [Source:MGI Symbol;Acc:MGI:3642338]	-
ENSMUSG00000064293	704.035	881.402	-0.32402	0.0262978	0.566049	762.881	724.044	0.0753274	0.624941	0.938352	866.5	714.527	0.277587	0.0619945	0.502611	769.571	720.649	0.0952094	0.283887	0.999695	Cntn4	6	105677660	106699310	+	8486	protein_coding	contactin 4 [Source:MGI Symbol;Acc:MGI:1095737]	-
ENSMUSG00000052397	222.15	166.674	0.41511	0.0264214	0.568102	243.113	228.389	0.0900321	0.600554	0.932452	180.859	225.427	-0.318339	0.082226	0.561089	236.675	227.379	0.0574932	0.727906	0.999695	Ezr	17	6738041	6782784	-	3290	protein_coding	ezrin [Source:MGI Symbol;Acc:MGI:98931]	-
ENSMUSG00000022244	373.361	306.393	0.285351	0.0264903	0.568369	378.61	384.206	-0.0207725	0.844698	0.975426	268.691	378.934	-0.494197	0.000841133	0.0329291	368.459	382.259	-0.0530649	0.644231	0.999695	Amacr	15	10981756	10996626	+	2606	protein_coding	alpha-methylacyl-CoA racemase [Source:MGI Symbol;Acc:MGI:1098273]	-
ENSMUSG00000078234	25.377	10.2205	1.32026	0.0264897	0.568369	28.8541	26.0751	0.145639	0.80074	0.968199	13.1473	25.7469	-0.976665	0.079042	0.554526	36.2614	25.9739	0.477441	0.146943	0.999695	Klhdc7a	4	139960220	139968026	-	7807	protein_coding	kelch domain containing 7A [Source:MGI Symbol;Acc:MGI:2444612]	-
ENSMUSG00000086782	170.789	127.319	0.423263	0.0265718	0.569509	145.253	175.637	-0.274979	0.111018	0.623685	154.395	173.329	-0.168003	0.274349	0.796224	161.312	174.824	-0.116287	0.414527	0.999695	E130102H24Rik	4	101346531	101356735	-	918	lincRNA	RIKEN cDNA E130102H24 gene [Source:MGI Symbol;Acc:MGI:1925116]	-
ENSMUSG00000026956	111.379	74.8532	0.571718	0.026655	0.570077	128.413	114.623	0.163842	0.350423	0.841745	82.7997	113.036	-0.444862	0.0337695	0.381918	108.226	114.043	-0.0758864	0.64543	0.999695	Uap1l1	2	25359889	25365682	-	4071	protein_coding	UDP-N-acteylglucosamine pyrophosphorylase 1-like 1 [Source:MGI Symbol;Acc:MGI:2443318]	-
ENSMUSG00000005373	25.9156	14.647	0.818918	0.0266387	0.570077	22.1583	26.6587	-0.267556	0.386205	0.858282	34.6333	26.3003	0.402299	0.355958	0.838956	26.6737	26.5296	0.00731808	0.978481	0.999695	Mlxipl	5	135089890	135138382	+	5538	protein_coding	MLX interacting protein-like [Source:MGI Symbol;Acc:MGI:1927999]	bHLH
ENSMUSG00000025092	3296.52	3894.24	-0.240367	0.0267134	0.570719	3258.74	3390.14	-0.057064	0.615795	0.936776	3734.89	3345.56	0.158761	0.0738257	0.542849	3251.11	3374.36	-0.0536457	0.448039	0.999695	Hspa12a	19	58795751	58860984	-	5733	protein_coding	heat shock protein 12A [Source:MGI Symbol;Acc:MGI:1920692]	-
ENSMUSG00000021127	206.358	158.786	0.379798	0.0268123	0.572223	209.04	212.158	-0.0223377	0.8724	0.97848	216.08	209.4	0.0459901	0.789224	0.964586	205.242	211.23	-0.0423669	0.744676	0.999695	Zfp36l1	12	80107754	80113013	-	2990	protein_coding	zinc finger protein 36, C3H type-like 1 [Source:MGI Symbol;Acc:MGI:107946]	-
ENSMUSG00000073640	6.26379	13.5134	-1.11113	0.0269512	0.573969	12.2992	6.44454	0.936872	0.0441483	0.441035	7.9518	6.35671	0.325031	0.53311	0.901751	9.65496	6.41315	0.594935	0.193446	1	Rpl27-ps3	18	6332590	6333064	+	475	protein_coding	ribosomal protein L27, pseudogene 3 [Source:MGI Symbol;Acc:MGI:3646174]	-
ENSMUSG00000081262	8.62563	3.01923	1.51646	0.0269342	0.573969	10.0462	8.87312	0.179313	0.709981	0.954596	8.14119	8.75631	-0.115048	0.840541	0.972211	7.15248	8.82871	-0.304066	0.630159	1	Gm12261	11	59577992	59578636	-	645	processed_pseudogene	predicted gene 12261 [Source:MGI Symbol;Acc:MGI:3650914]	-
ENSMUSG00000019990	165.963	232.936	-0.488633	0.0270013	0.574427	200.51	170.635	0.233016	0.216006	0.748243	195.893	168.431	0.216337	0.251914	0.780717	170.945	169.867	0.00872359	0.954679	0.999695	Pde7b	10	20398004	20725078	-	12444	protein_coding	phosphodiesterase 7B [Source:MGI Symbol;Acc:MGI:1352752]	-
ENSMUSG00000057880	1429.18	1640.37	-0.198845	0.0271072	0.575354	1574.3	1469.77	0.0991371	0.291257	0.808674	1698.43	1450.41	0.227544	0.00501119	0.12239	1469.84	1462.95	0.00675685	0.932863	0.999695	Abat	16	8513429	8621568	+	7748	protein_coding	4-aminobutyrate aminotransferase [Source:MGI Symbol;Acc:MGI:2443582]	-
ENSMUSG00000097203	8.43231	3.05231	1.47706	0.0271307	0.575354	3.12627	8.68173	-1.46671	0.0101936	0.209106	4.82929	8.55919	-0.840173	0.148904	0.677754	4.15026	8.63414	-1.05312	0.0508346	1	4732419C18Rik	8	123744631	123754726	-	3536	lincRNA	RIKEN cDNA 4732419C18 gene [Source:MGI Symbol;Acc:MGI:3045379]	-
ENSMUSG00000024772	438.099	343.07	0.352459	0.0270863	0.575354	494.16	450.8	0.132546	0.328946	0.830465	418.753	444.622	-0.0857782	0.444196	0.873807	458.297	448.55	0.030945	0.741656	0.999695	Ehd1	19	6276725	6300096	+	3705	protein_coding	EH-domain containing 1 [Source:MGI Symbol;Acc:MGI:1341878]	-
ENSMUSG00000001520	383.368	306.273	0.323442	0.0274036	0.580141	310.831	394.193	-0.342449	0.00457932	0.129181	318.189	389.063	-0.290579	0.0329188	0.377033	322.482	392.404	-0.282946	0.0177494	0.999695	Nrip2	6	128399296	128416427	+	3757	protein_coding	nuclear receptor interacting protein 2 [Source:MGI Symbol;Acc:MGI:1891884]	-
ENSMUSG00000037003	410.638	338.873	0.27655	0.0274142	0.580141	422.655	422.468	0.0010909	0.992721	0.998935	367.348	416.761	-0.179868	0.0864307	0.573922	425.498	420.396	0.0181985	0.81352	0.999695	Tns2	15	102100413	102116401	+	5452	protein_coding	tensin 2 [Source:MGI Symbol;Acc:MGI:2387586]	-
ENSMUSG00000050953	254.345	90.9188	1.48453	0.027492	0.581176	219.715	261.241	-0.24975	0.681129	0.948392	118.71	258.027	-1.1209	0.0810225	0.559439	252.666	260.307	-0.0432008	0.905814	0.999695	Gja1	10	56377330	56402513	+	10257	protein_coding	gap junction protein, alpha 1 [Source:MGI Symbol;Acc:MGI:95713]	-
ENSMUSG00000049583	365.033	447.705	-0.294342	0.027618	0.581656	382.217	375.404	0.0259421	0.883317	0.979705	441.325	370.469	0.252006	0.0524209	0.468727	398.521	373.648	0.0933891	0.324788	0.999695	Grm5	7	87584168	88134907	+	10247	protein_coding	glutamate receptor, metabotropic 5 [Source:MGI Symbol;Acc:MGI:1351342]	-
ENSMUSG00000026879	149.985	112.432	0.417177	0.0275547	0.581656	168.056	154.275	0.122767	0.448464	0.881003	126.057	152.208	-0.274264	0.111273	0.621418	176.058	153.552	0.19571	0.120814	0.999695	Gsn	2	35256380	35307892	+	3157	protein_coding	gelsolin [Source:MGI Symbol;Acc:MGI:95851]	-
ENSMUSG00000031504	26.3233	15.7041	0.743027	0.0276304	0.581656	39.0394	27.0875	0.526705	0.079399	0.557601	18.8242	26.7133	-0.503799	0.195919	0.728985	28.9204	26.9532	0.100502	0.745273	0.999695	Rab20	8	11453518	11478710	-	1392	protein_coding	RAB20, member RAS oncogene family [Source:MGI Symbol;Acc:MGI:102789]	-
ENSMUSG00000081603	35.0077	20.1276	0.796037	0.0275797	0.581656	37.7745	36.0291	0.0695502	0.817643	0.970018	36.0281	35.5286	0.021793	0.939594	0.991845	40.9216	35.8455	0.18943	0.449888	0.999695	Gm14681	X	66778442	66778852	-	411	processed_pseudogene	predicted gene 14681 [Source:MGI Symbol;Acc:MGI:3705734]	-
ENSMUSG00000024172	390.273	495.323	-0.343501	0.0277107	0.582127	450.291	401.397	0.165615	0.329769	0.831037	530.539	396.085	0.42101	0.000180983	0.00940692	393.638	399.5	-0.0206061	0.797007	0.999695	St6gal2	17	55445382	55514581	+	7375	protein_coding	beta galactoside alpha 2,6 sialyltransferase 2 [Source:MGI Symbol;Acc:MGI:2445190]	-
ENSMUSG00000042870	235.814	187.094	0.333483	0.0276969	0.582127	204.572	242.537	-0.245915	0.06869	0.525909	212.942	239.305	-0.167137	0.378261	0.847369	250.044	241.401	0.0498327	0.673439	0.999695	Tom1	8	75033705	75070121	+	2499	protein_coding	target of myb1 trafficking protein [Source:MGI Symbol;Acc:MGI:1338026]	-
ENSMUSG00000040618	386.156	307.836	0.326258	0.0278335	0.582274	330.217	397.312	-0.266657	0.00856379	0.191836	277.741	391.914	-0.496672	6.30512e-05	0.00401991	439.95	395.344	0.154594	0.166741	0.999695	Pck2	14	55540266	55551242	+	7806	protein_coding	phosphoenolpyruvate carboxykinase 2 (mitochondrial) [Source:MGI Symbol;Acc:MGI:1860456]	-
ENSMUSG00000021806	57.2347	29.2973	0.968864	0.0278232	0.582274	53.1526	58.7955	-0.146472	0.724223	0.955714	33.2953	58.0627	-0.804448	0.0765269	0.549048	74.0568	58.5783	0.337275	0.314307	0.999695	Nid2	14	19751265	19811787	+	5174	protein_coding	nidogen 2 [Source:MGI Symbol;Acc:MGI:1298229]	-
ENSMUSG00000032902	3142.84	3626.13	-0.206371	0.0277802	0.582274	2883.99	3232.85	-0.164689	0.0727322	0.537982	3223.27	3189.65	0.0148639	0.863599	0.977663	3491.49	3217.29	0.1181	0.0418316	0.999695	Slc16a1	3	104638668	104658462	+	4426	protein_coding	solute carrier family 16 (monocarboxylic acid transporters), member 1 [Source:MGI Symbol;Acc:MGI:106013]	-
ENSMUSG00000055733	356.398	417.362	-0.227765	0.0278011	0.582274	373.512	366.683	0.0263337	0.830007	0.972759	361.43	361.709	-0.00305565	0.976703	0.99671	353.31	364.878	-0.0460316	0.570946	0.999695	Nap1l3	X	122394565	122397401	-	2837	protein_coding	nucleosome assembly protein 1-like 3 [Source:MGI Symbol;Acc:MGI:1859565]	-
ENSMUSG00000032041	211.599	161.017	0.396633	0.0278793	0.582626	195.524	217.668	-0.156302	0.320066	0.826467	198.609	214.743	-0.112421	0.504559	0.895068	198.235	216.627	-0.129236	0.207819	0.999695	Tirap	9	35184551	35200291	-	4929	protein_coding	toll-interleukin 1 receptor (TIR) domain-containing adaptor protein [Source:MGI Symbol;Acc:MGI:2152213]	-
ENSMUSG00000032186	1586.38	2038.13	-0.361399	0.0281184	0.585517	1713.98	1631.12	0.0713945	0.642062	0.940707	2042.08	1609.92	0.342841	0.00467448	0.116955	1656.31	1623.75	0.0287084	0.769831	0.999695	Tmod2	9	75565621	75611325	-	11683	protein_coding	tropomodulin 2 [Source:MGI Symbol;Acc:MGI:1355335]	-
ENSMUSG00000004902	52.4375	36.3039	0.527739	0.0280962	0.585517	41.3254	53.9443	-0.379365	0.130894	0.65088	36.1157	53.2232	-0.565353	0.0328662	0.377033	38.3208	53.6787	-0.482453	0.0313973	0.999695	Slc25a18	6	120773578	120794336	+	1911	protein_coding	solute carrier family 25 (mitochondrial carrier), member 18 [Source:MGI Symbol;Acc:MGI:1919053]	-
ENSMUSG00000040675	237.416	196.909	0.270557	0.0281547	0.585517	222.944	244.224	-0.133042	0.308762	0.820694	202.926	240.952	-0.245136	0.0817089	0.560594	232.936	243.048	-0.0629154	0.562874	0.999695	Mthfd1l	10	3973118	4167081	+	4435	protein_coding	methylenetetrahydrofolate dehydrogenase (NADP+ dependent) 1-like [Source:MGI Symbol;Acc:MGI:1924836]	-
ENSMUSG00000015932	1798.67	2166.52	-0.268371	0.0281633	0.585517	2032.36	1850.29	0.1355	0.0983423	0.597533	1992.45	1825.5	0.125918	0.156741	0.686386	1858.23	1841.32	0.0133633	0.828663	0.999695	Dstn	2	143915320	143943324	+	1911	protein_coding	destrin [Source:MGI Symbol;Acc:MGI:1929270]	-
ENSMUSG00000029075	40.1095	26.0584	0.618209	0.028085	0.585517	60.1629	41.2536	0.544334	0.0565712	0.483693	36.3464	40.7015	-0.165875	0.496366	0.891457	38.135	41.0639	-0.110698	0.62667	0.999695	Tnfrsf4	4	156013843	156016612	+	1365	protein_coding	tumor necrosis factor receptor superfamily, member 4 [Source:MGI Symbol;Acc:MGI:104512]	-
ENSMUSG00000004151	152.935	215.058	-0.490813	0.0281946	0.585561	187.615	157.235	0.253706	0.109719	0.620797	209.125	155.195	0.429763	0.00342906	0.094115	159.368	156.538	0.0256614	0.863413	0.999695	Etv1	12	38779380	38870484	+	13296	protein_coding	ets variant 1 [Source:MGI Symbol;Acc:MGI:99254]	ETS
ENSMUSG00000028698	1317.66	1542.03	-0.226796	0.0282419	0.58594	1570.57	1355.23	0.212899	0.00681654	0.168169	1688.81	1337.24	0.33644	6.93108e-05	0.00433308	1451.98	1348.86	0.106416	0.117115	0.999695	Pik3r3	4	116221618	116303056	+	5300	protein_coding	phosphoinositide-3-kinase regulatory subunit 3 [Source:MGI Symbol;Acc:MGI:109277]	-
ENSMUSG00000040412	232.966	285.114	-0.291666	0.0282803	0.58613	251.508	239.588	0.069423	0.553363	0.917998	296.873	236.431	0.32777	0.00332493	0.0920762	240.527	238.466	0.0132467	0.901284	0.999695	5330417C22Rik	3	108455694	108536536	-	6304	protein_coding	RIKEN cDNA 5330417C22 gene [Source:MGI Symbol;Acc:MGI:1923930]	-
ENSMUSG00000014592	2728.89	3321.49	-0.283413	0.0283994	0.586453	2929.32	2806.76	0.0616113	0.439733	0.876796	3347.48	2769.51	0.273195	0.000342282	0.0161355	2807.53	2793.46	0.0073219	0.895082	0.999695	Camta1	4	150917322	151861876	-	14570	protein_coding	calmodulin binding transcription activator 1 [Source:MGI Symbol;Acc:MGI:2140230]	CG-1
ENSMUSG00000020256	123.993	81.8782	0.599768	0.0283318	0.586453	47.2042	127.469	-1.43312	4.04264e-08	2.36229e-05	61.2768	125.842	-1.03877	0.000843962	0.032976	104.61	126.897	-0.277135	0.186357	0.999695	Aldh1l2	10	83487450	83534140	-	7503	protein_coding	aldehyde dehydrogenase 1 family, member L2 [Source:MGI Symbol;Acc:MGI:2444680]	-
ENSMUSG00000048070	26.8604	15.6771	0.774531	0.0283979	0.586453	35.5939	27.6283	0.365014	0.238816	0.764288	50.0724	27.2554	0.876529	0.00129609	0.0458081	26.111	27.5003	-0.0758546	0.828848	0.999695	Pirt	11	66911981	66929876	+	4200	protein_coding	phosphoinositide-interacting regulator of transient receptor potential channels [Source:MGI Symbol;Acc:MGI:2443635]	-
ENSMUSG00000086679	7.73969	2.23832	1.77876	0.0284404	0.586453	5.51498	7.95898	-0.524222	0.382012	0.856127	4.31688	7.85609	-0.870249	0.203885	0.737603	5.50415	7.92117	-0.513364	0.37563	1	Gm15551	3	126667329	126669044	-	535	antisense	predicted gene 15551 [Source:MGI Symbol;Acc:MGI:3783000]	-
ENSMUSG00000039936	189.388	150.222	0.333933	0.0284417	0.586453	246.283	194.857	0.338392	0.040182	0.42361	194.843	192.221	0.0221011	0.877034	0.979094	210.142	193.885	0.116592	0.372741	0.999695	Pik3cd	4	149649168	149702571	-	6259	protein_coding	phosphatidylinositol-4,5-bisphosphate 3-kinase catalytic subunit delta [Source:MGI Symbol;Acc:MGI:1098211]	-
ENSMUSG00000042608	1001.9	802.857	0.319294	0.0285482	0.588047	900.466	1030.81	-0.195161	0.0692808	0.526488	855.914	1016.81	-0.248354	0.0122326	0.217982	1029.06	1025.73	0.00464016	0.956883	0.999695	Stk40	4	126103957	126141029	+	4117	protein_coding	serine/threonine kinase 40 [Source:MGI Symbol;Acc:MGI:1921428]	-
ENSMUSG00000019966	322.539	245.831	0.393132	0.0286566	0.589675	275.703	331.714	-0.267676	0.0507758	0.466285	413.458	327.327	0.335034	0.00521562	0.125812	307.495	330.169	-0.102487	0.256961	0.999695	Kitl	10	100015630	100100416	+	5911	protein_coding	kit ligand [Source:MGI Symbol;Acc:MGI:96974]	-
ENSMUSG00000040133	134.44	169.847	-0.337365	0.0288573	0.593197	161.353	138.312	0.223027	0.108648	0.619133	166.419	136.442	0.286654	0.0486056	0.45339	165.286	137.632	0.265089	0.0330575	0.999695	Gpr176	2	118277110	118373419	-	3899	protein_coding	G protein-coupled receptor 176 [Source:MGI Symbol;Acc:MGI:2685858]	-
ENSMUSG00000030111	604.559	383.405	0.657693	0.0288982	0.593432	1060.29	621.655	0.770199	0.0220257	0.313916	495.907	613.441	-0.306669	0.489521	0.888767	881.34	618.891	0.509866	0.0763562	0.999695	A2m	6	121635376	121679227	+	7021	protein_coding	alpha-2-macroglobulin [Source:MGI Symbol;Acc:MGI:2449119]	-
ENSMUSG00000110899	2.76063	7.49772	-1.45069	0.0290135	0.594629	6.43007	2.84197	1.18979	0.076814	0.549878	5.27789	2.80234	0.91489	0.238915	0.767269	3.14986	2.82669	0.167064	0.823457	1	Gm48840	9	45051424	45055344	-	3921	TEC	predicted gene, 48840 [Source:MGI Symbol;Acc:MGI:6098571]	-
ENSMUSG00000079477	2461.16	2768.67	-0.169911	0.0290157	0.594629	2656.14	2531.83	0.0692729	0.230039	0.760528	2464.23	2497.85	-0.0196197	0.778519	0.963598	2531.83	2519.53	0.00717007	0.876227	0.999695	Rab7	6	87999106	88045270	-	2610	protein_coding	RAB7, member RAS oncogene family [Source:MGI Symbol;Acc:MGI:105068]	-
ENSMUSG00000054409	88.4592	61.1253	0.534393	0.0290764	0.595267	45.8656	90.9409	-0.990788	6.95821e-06	0.00177604	48.858	89.7717	-0.875283	3.87769e-05	0.00264459	83.7022	90.5378	-0.111899	0.595453	0.999695	Tmem74	15	43864646	43870036	-	3528	protein_coding	transmembrane protein 74 [Source:MGI Symbol;Acc:MGI:2443417]	-
ENSMUSG00000025466	262.866	210.532	0.319549	0.0292044	0.59728	276.656	270.46	0.0324449	0.840943	0.974777	247.457	266.778	-0.106526	0.503086	0.894632	257.776	269.122	-0.0620158	0.598027	0.999695	Fuom	7	140096770	140102441	-	3272	protein_coding	fucose mutarotase [Source:MGI Symbol;Acc:MGI:1916314]	-
ENSMUSG00000036246	187.062	142.571	0.392015	0.0294269	0.598351	210.435	192.484	0.128661	0.441598	0.877787	168.95	189.851	-0.167573	0.254676	0.782962	192.132	191.517	0.00373948	0.975693	0.999695	Gmip	8	69808679	69821870	+	5552	protein_coding	Gem-interacting protein [Source:MGI Symbol;Acc:MGI:1926066]	-
ENSMUSG00000002847	3.91017	9.93652	-1.34946	0.0294354	0.598351	11.584	4.02481	1.52594	0.0101841	0.209106	6.88513	3.96855	0.80045	0.262862	0.787601	7.86349	4.00326	0.978156	0.0973011	1	Pla1a	16	38396117	38433145	-	2009	protein_coding	phospholipase A1 member A [Source:MGI Symbol;Acc:MGI:1934677]	-
ENSMUSG00000024064	168.515	213.251	-0.338809	0.0294136	0.598351	201.112	173.28	0.214389	0.0951923	0.592739	190.608	171.014	0.157098	0.26397	0.788442	173.728	172.49	0.0112743	0.927019	0.999695	Galnt14	17	73493228	73710453	-	5898	protein_coding	polypeptide N-acetylgalactosaminyltransferase 14 [Source:MGI Symbol;Acc:MGI:1918935]	-
ENSMUSG00000006390	272.441	208.921	0.381937	0.0293916	0.598351	261.631	280.356	-0.0998899	0.47502	0.89262	244.47	276.509	-0.176287	0.280211	0.797741	293.41	278.933	0.0728173	0.480939	0.999695	Elovl1	4	118428093	118432953	+	2726	protein_coding	elongation of very long chain fatty acids (FEN1/Elo2, SUR4/Elo3, yeast)-like 1 [Source:MGI Symbol;Acc:MGI:1858959]	-
ENSMUSG00000045284	189.628	227.967	-0.265405	0.029389	0.598351	213.451	195.067	0.130291	0.322366	0.827913	188.98	192.452	-0.0275678	0.834924	0.970865	206.861	194.129	0.0915267	0.408549	0.999695	Dcaf12l1	X	44786570	44790197	-	3531	protein_coding	DDB1 and CUL4 associated factor 12-like 1 [Source:MGI Symbol;Acc:MGI:2444462]	-
ENSMUSG00000004099	1553.5	1363.67	0.187959	0.0294331	0.598351	1512.04	1597.89	-0.0797253	0.286578	0.805144	1572.31	1576.59	-0.00406495	0.951818	0.993003	1585.45	1590.32	-0.00475207	0.928881	0.999695	Dnmt1	9	20907209	20959888	-	7377	protein_coding	DNA methyltransferase (cytosine-5) 1 [Source:MGI Symbol;Acc:MGI:94912]	-
ENSMUSG00000024927	637.469	499.149	0.352307	0.0294699	0.598448	701.546	655.861	0.0971491	0.459719	0.886417	616.357	646.956	-0.0687648	0.581984	0.91918	665.837	652.634	0.0289271	0.74497	0.999695	Rela	19	5637483	5648130	+	2716	protein_coding	v-rel reticuloendotheliosis viral oncogene homolog A (avian) [Source:MGI Symbol;Acc:MGI:103290]	RHD
ENSMUSG00000056812	421.389	532.915	-0.338683	0.0295619	0.598501	500.487	433.388	0.207787	0.107981	0.617522	539.095	427.679	0.334374	0.00433377	0.111215	447.874	431.329	0.0544851	0.631272	0.999695	St8sia3	18	64254359	64276146	+	6665	protein_coding	ST8 alpha-N-acetyl-neuraminide alpha-2,8-sialyltransferase 3 [Source:MGI Symbol;Acc:MGI:106019]	-
ENSMUSG00000046532	15.1884	26.6605	-0.808011	0.0295509	0.598501	16.507	15.6329	0.0821995	0.833602	0.972958	25.4924	15.415	0.721844	0.0525987	0.469943	10.5078	15.5521	-0.568927	0.114767	0.999695	Ar	X	98148769	98323215	+	10048	protein_coding	androgen receptor [Source:MGI Symbol;Acc:MGI:88064]	ESR-like
ENSMUSG00000104392	16.833	8.40935	1.01201	0.0295576	0.598501	13.4772	17.3018	-0.356751	0.331851	0.83124	10.537	17.0828	-0.715302	0.122712	0.644967	9.66649	17.2265	-0.829942	0.0259898	0.999695	Gm37962	9	101113805	101115838	+	2034	TEC	predicted gene, 37962 [Source:MGI Symbol;Acc:MGI:5611190]	-
ENSMUSG00000021301	510.29	693.93	-0.443347	0.0296343	0.598587	483.394	524.753	-0.118467	0.474083	0.892215	673.606	517.89	0.378743	0.0286482	0.348517	485.711	522.318	-0.104479	0.430768	0.999695	Hecw1	13	14226438	14523228	-	14672	protein_coding	HECT, C2 and WW domain containing E3 ubiquitin protein ligase 1 [Source:MGI Symbol;Acc:MGI:2444115]	-
ENSMUSG00000036298	555.38	707.616	-0.3492	0.0296554	0.598587	555.941	571.252	-0.0390504	0.752728	0.959975	636.008	563.662	0.174576	0.0365339	0.397361	536.546	568.517	-0.0835043	0.290525	0.999695	Slc2a13	15	91267696	91573261	-	8367	protein_coding	solute carrier family 2 (facilitated glucose transporter), member 13 [Source:MGI Symbol;Acc:MGI:2146030]	-
ENSMUSG00000044393	11.3632	2.80472	2.02648	0.0296182	0.598587	17.0146	11.6784	0.544286	0.36953	0.850171	4.92004	11.532	-1.22045	0.0473639	0.449098	12.76	11.6296	0.137641	0.794712	0.999695	Dsg2	18	20558074	20604521	+	8268	protein_coding	desmoglein 2 [Source:MGI Symbol;Acc:MGI:1196466]	-
ENSMUSG00000064210	275.022	229.223	0.263807	0.0297227	0.599343	290.809	282.853	0.0394936	0.718733	0.955449	265.225	279.109	-0.0738103	0.513171	0.89721	276.893	281.532	-0.0236211	0.791593	0.999695	Ano6	15	95790843	95974751	+	12269	protein_coding	anoctamin 6 [Source:MGI Symbol;Acc:MGI:2145890]	-
ENSMUSG00000089679	53.4796	38.0167	0.496225	0.0300279	0.604285	48.5347	55.0153	-0.179979	0.452974	0.883258	42.6741	54.274	-0.349785	0.0980413	0.59984	53.9709	54.7498	-0.0204176	0.908798	0.999695	Gm16299	19	53819354	53825128	-	2766	antisense	predicted gene 16299 [Source:MGI Symbol;Acc:MGI:3826539]	-
ENSMUSG00000021799	44.0649	61.8621	-0.490084	0.0300177	0.604285	35.943	45.3205	-0.332884	0.160297	0.689391	44.4374	44.7142	-0.00904887	0.971311	0.995095	43.4417	45.1142	-0.0541791	0.803241	0.999695	Opn4	14	34590618	34600142	-	2961	protein_coding	opsin 4 (melanopsin) [Source:MGI Symbol;Acc:MGI:1353425]	-
ENSMUSG00000039579	148.46	209.6	-0.497942	0.0301062	0.605256	144.571	152.606	-0.0781098	0.733428	0.956911	151.958	150.671	0.0113335	0.966889	0.993984	144.181	151.928	-0.0749063	0.710749	0.999695	Grin3a	4	49661611	49845744	-	12275	protein_coding	glutamate receptor ionotropic, NMDA3A [Source:MGI Symbol;Acc:MGI:1933206]	-
ENSMUSG00000032503	55.5938	88.6247	-0.672134	0.0303572	0.609691	70.3533	57.1536	0.298767	0.321282	0.827669	94.947	56.4213	0.751516	0.0150284	0.245927	64.5736	56.8956	0.181812	0.519819	0.999695	Arpp21	9	112065091	112235938	-	17428	protein_coding	cyclic AMP-regulated phosphoprotein, 21 [Source:MGI Symbol;Acc:MGI:107562]	-
ENSMUSG00000021895	188.778	142.272	0.409874	0.0304156	0.610254	116.049	194.122	-0.742513	3.33752e-08	2.13806e-05	94.9954	191.577	-1.01329	7.9809e-11	1.99576e-08	203.235	193.237	0.0725561	0.510277	0.999695	Arhgef3	14	27114899	27403911	+	4527	protein_coding	Rho guanine nucleotide exchange factor (GEF) 3 [Source:MGI Symbol;Acc:MGI:1918954]	-
ENSMUSG00000039519	42.6631	60.4477	-0.500479	0.0304479	0.610293	60.9509	43.8991	0.471218	0.0285025	0.358287	58.384	43.2994	0.425237	0.0917423	0.587602	59.1373	43.6798	0.435642	0.0214503	0.999695	Cyp7b1	3	18071950	18243338	-	2166	protein_coding	cytochrome P450, family 7, subfamily b, polypeptide 1 [Source:MGI Symbol;Acc:MGI:104978]	-
ENSMUSG00000051855	1294.88	1056.67	0.293636	0.030587	0.611253	1414.91	1331.79	0.087089	0.415092	0.867423	1191.85	1314.11	-0.140576	0.165742	0.698122	1354.74	1325.54	0.0311481	0.738251	0.999695	Mest	6	30723547	30748465	+	3945	protein_coding	mesoderm specific transcript [Source:MGI Symbol;Acc:MGI:96968]	-
ENSMUSG00000075224	41.5498	57.2569	-0.462569	0.030549	0.611253	48.3583	42.7479	0.176235	0.418019	0.8678	50.0311	42.1701	0.242551	0.287551	0.802328	36.0273	42.5367	-0.240344	0.319738	0.999695	Lrrc55	2	85162334	85196699	-	4080	protein_coding	leucine rich repeat containing 55 [Source:MGI Symbol;Acc:MGI:2685197]	-
ENSMUSG00000015759	901.306	1110.7	-0.301148	0.0305775	0.611253	1014.06	927.246	0.129169	0.165667	0.695603	894.054	914.721	-0.0336585	0.707002	0.948931	965.536	922.721	0.0651419	0.414874	0.999695	Cnih1	14	46775567	46788411	-	1623	protein_coding	cornichon family AMPA receptor auxiliary protein 1 [Source:MGI Symbol;Acc:MGI:1277202]	-
ENSMUSG00000031840	3106.01	3739.47	-0.267784	0.0306382	0.611669	3594.96	3195.81	0.169765	0.0922001	0.586524	3447.95	3152.16	0.129369	0.179864	0.712619	3201.18	3180.1	0.00944572	0.910966	0.999695	Rab3a	8	70754679	70758677	+	2226	protein_coding	RAB3A, member RAS oncogene family [Source:MGI Symbol;Acc:MGI:97843]	-
ENSMUSG00000069083	30.5087	45.2631	-0.572948	0.0306924	0.612144	32.387	31.3795	0.0461989	0.846535	0.975556	40.1045	30.965	0.367342	0.194691	0.728652	37.7674	31.2288	0.275541	0.249397	0.999695	Gm10259	3	25211016	25212605	-	1590	processed_pseudogene	predicted pseudogene 10259 [Source:MGI Symbol;Acc:MGI:3704211]	-
ENSMUSG00000004056	1097.11	904.654	0.278031	0.0307927	0.613535	1095.12	1128.73	-0.0436578	0.657141	0.942293	918.231	1113.43	-0.277971	0.00106104	0.0392116	1078.8	1123.21	-0.0583315	0.437181	0.999695	Akt2	7	27591552	27640826	+	7131	protein_coding	thymoma viral proto-oncogene 2 [Source:MGI Symbol;Acc:MGI:104874]	-
ENSMUSG00000028194	856.947	1078.47	-0.331417	0.0309699	0.614597	1098.45	881.416	0.317316	0.0012409	0.0590205	994.567	869.695	0.193699	0.0233822	0.313424	904.501	877.242	0.0439314	0.588573	0.999695	Ddah1	3	145758675	145894277	+	3983	protein_coding	dimethylarginine dimethylaminohydrolase 1 [Source:MGI Symbol;Acc:MGI:1916469]	-
ENSMUSG00000027359	2.75809	7.56763	-1.45981	0.0309646	0.614597	4.84858	2.83671	0.786995	0.256181	0.780456	5.1514	2.79942	0.894087	0.229061	0.760927	4.3132	2.82301	0.62232	0.410511	1	Slc27a2	2	126552407	126588243	+	3754	protein_coding	solute carrier family 27 (fatty acid transporter), member 2 [Source:MGI Symbol;Acc:MGI:1347099]	-
ENSMUSG00000064080	30.6073	17.1023	0.835319	0.0308952	0.614597	29.9811	31.4773	-0.0680698	0.834894	0.973337	25.2005	31.0588	-0.30462	0.30226	0.811729	28.9566	31.3347	-0.112423	0.693967	0.999695	Fbln2	6	91212455	91272540	+	6370	protein_coding	fibulin 2 [Source:MGI Symbol;Acc:MGI:95488]	-
ENSMUSG00000027217	41.5729	27.4678	0.602048	0.0310294	0.614597	39.3256	42.7359	-0.11754	0.680351	0.948051	49.1642	42.1857	0.218498	0.358899	0.839818	41.1934	42.5518	-0.0476168	0.841548	0.999695	Tspan18	2	93201760	93334505	-	8175	protein_coding	tetraspanin 18 [Source:MGI Symbol;Acc:MGI:1917186]	-
ENSMUSG00000020097	537.342	460.619	0.222862	0.0309582	0.614597	588.959	552.786	0.0914048	0.287845	0.806369	562.36	545.333	0.0446309	0.604612	0.926598	580.611	550.104	0.0775611	0.328405	0.999695	Sgpl1	10	61098642	61147703	-	6143	protein_coding	sphingosine phosphate lyase 1 [Source:MGI Symbol;Acc:MGI:1261415]	-
ENSMUSG00000031467	1725.38	1924.35	-0.157639	0.0310004	0.614597	1825.88	1774.75	0.0410247	0.55364	0.918117	1748.11	1751.03	-0.00290981	0.970194	0.994996	1823.83	1766.29	0.0461158	0.434561	0.999695	Agpat5	8	18846277	18891361	+	10783	protein_coding	1-acylglycerol-3-phosphate O-acyltransferase 5 (lysophosphatidic acid acyltransferase, epsilon) [Source:MGI Symbol;Acc:MGI:1196345]	-
ENSMUSG00000042271	372.227	473.751	-0.347449	0.031171	0.615104	399.124	382.833	0.0602832	0.614029	0.93587	451.622	377.773	0.256632	0.0164583	0.258485	386.492	381.022	0.0208824	0.82443	0.999695	Nxt2	X	142226770	142239692	+	3176	protein_coding	nuclear transport factor 2-like export factor 2 [Source:MGI Symbol;Acc:MGI:2147914]	-
ENSMUSG00000058254	7271.74	8141.2	-0.162952	0.0311774	0.615104	7355.35	7481.31	-0.0244906	0.654429	0.942036	7739.78	7380.11	0.068637	0.210804	0.745968	7595.44	7444.57	0.0289406	0.578707	0.999695	Tspan7	X	10485158	10596605	+	7067	protein_coding	tetraspanin 7 [Source:MGI Symbol;Acc:MGI:1298407]	-
ENSMUSG00000055214	39.0496	23.0888	0.760656	0.0311719	0.615104	25.3499	40.118	-0.661601	0.0422076	0.434439	34.9468	39.6197	-0.187683	0.617107	0.929813	32.5046	39.9633	-0.300315	0.343303	0.999695	Pld5	1	175962306	176275312	-	10094	protein_coding	phospholipase D family, member 5 [Source:MGI Symbol;Acc:MGI:2442056]	-
ENSMUSG00000074647	12.0641	5.52794	1.13056	0.031107	0.615104	6.03927	12.4119	-1.03549	0.0259328	0.342081	11.4133	12.2436	-0.0910365	0.853684	0.975685	10.8331	12.352	-0.188371	0.633856	0.999695	Fam83c	2	155827548	155834854	-	3972	protein_coding	family with sequence similarity 83, member C [Source:MGI Symbol;Acc:MGI:1918655]	-
ENSMUSG00000026163	4245.43	5117.62	-0.269501	0.0313484	0.617784	4554.71	4366.14	0.0609653	0.639083	0.940707	5067.37	4308.54	0.233894	0.037051	0.400514	4142.49	4345.78	-0.0690937	0.293124	0.999695	Sphkap	1	83254139	83408200	-	9602	protein_coding	SPHK1 interactor, AKAP domain containing [Source:MGI Symbol;Acc:MGI:1924879]	-
ENSMUSG00000026526	730.786	836.973	-0.195356	0.0313747	0.617784	736.881	751.815	-0.0292282	0.694845	0.950695	699.746	741.649	-0.0837343	0.317225	0.819133	735.187	748.168	-0.0253345	0.742553	0.999695	Fh1	1	175600374	175625635	-	3392	protein_coding	fumarate hydratase 1 [Source:MGI Symbol;Acc:MGI:95530]	-
ENSMUSG00000005696	239.381	296.87	-0.310167	0.0314723	0.618554	238.646	246.183	-0.0446544	0.758044	0.960946	253.241	242.945	0.0591195	0.621103	0.930149	277.407	245.033	0.179075	0.093387	0.999695	Sh2d1a	X	42502453	42529330	+	5505	protein_coding	SH2 domain containing 1A [Source:MGI Symbol;Acc:MGI:1328352]	-
ENSMUSG00000031198	739.177	870.117	-0.235209	0.0314754	0.618554	782.697	760.288	0.0420384	0.577681	0.926065	750.841	750.143	0.00210624	0.979433	0.997166	807.13	756.709	0.0928705	0.142866	0.999695	Fundc2	X	75382399	75396459	+	2785	protein_coding	FUN14 domain containing 2 [Source:MGI Symbol;Acc:MGI:1914641]	-
ENSMUSG00000040212	46.6549	26.1295	0.835176	0.031552	0.618849	64.7072	48.0353	0.429535	0.159216	0.688783	28.9578	47.3482	-0.705298	0.0381971	0.405598	53.6427	47.7817	0.164998	0.500804	0.999695	Emp3	7	45918023	45921404	-	1071	protein_coding	epithelial membrane protein 3 [Source:MGI Symbol;Acc:MGI:1098729]	-
ENSMUSG00000090150	382.031	441.515	-0.208874	0.0315378	0.618849	400.829	392.98	0.0276456	0.78059	0.963468	402.236	387.718	0.0534046	0.580588	0.919174	381.381	391.094	-0.0372093	0.661416	0.999695	Acad11	9	104063377	104127725	+	9798	protein_coding	acyl-Coenzyme A dehydrogenase family, member 11 [Source:MGI Symbol;Acc:MGI:2143169]	-
ENSMUSG00000041608	68.3978	91.1371	-0.414058	0.0316488	0.620145	104.304	70.3582	0.5671	0.00219041	0.0837692	107.082	69.41	0.624413	0.000250956	0.0123319	65.2653	70.0242	-0.102554	0.537722	0.999695	Entpd3	9	120539818	120568327	+	3755	protein_coding	ectonucleoside triphosphate diphosphohydrolase 3 [Source:MGI Symbol;Acc:MGI:1321386]	-
ENSMUSG00000042826	795.481	944.003	-0.247121	0.031779	0.620276	903.353	818.393	0.142394	0.104455	0.611073	1027.36	807.339	0.347876	4.16145e-05	0.00278743	862.844	814.377	0.0827803	0.303523	0.999695	Fgf11	11	69796068	69801857	-	3044	protein_coding	fibroblast growth factor 11 [Source:MGI Symbol;Acc:MGI:109167]	-
ENSMUSG00000087200	44.5643	30.2637	0.562351	0.0317248	0.620276	32.7747	45.8679	-0.481244	0.0584744	0.490734	28.5897	45.2309	-0.655429	0.0121157	0.216609	34.5248	45.6297	-0.403465	0.0764619	0.999695	Lrp8os3	4	107793161	107802064	-	1770	bidirectional_promoter_lncRNA	low density lipoprotein receptor-related protein 8, apolipoprotein e receptor, opposite strand 3 [Source:MGI Symbol;Acc:MGI:3651133]	-
ENSMUSG00000087249	23.2057	13.2216	0.809817	0.0317594	0.620276	13.7167	23.8924	-0.800014	0.0144165	0.254177	17.4262	23.5525	-0.427662	0.237934	0.76672	21.5491	23.7647	-0.141302	0.623751	0.999695	Gm16062	11	59810080	59818491	+	771	antisense	predicted gene 16062 [Source:MGI Symbol;Acc:MGI:3802162]	-
ENSMUSG00000040653	39.6579	55.8863	-0.496676	0.0317014	0.620276	50.6202	40.8147	0.310962	0.224997	0.755459	38.9211	40.2518	-0.0504152	0.829898	0.970611	45.8182	40.6031	0.175844	0.397675	0.999695	Ppp1r14c	10	3366057	3464975	+	2617	protein_coding	protein phosphatase 1, regulatory inhibitor subunit 14C [Source:MGI Symbol;Acc:MGI:1923392]	-
ENSMUSG00000043498	144.767	203.286	-0.488613	0.0321156	0.624842	184.284	148.874	0.306425	0.0762352	0.549257	213.255	146.911	0.535078	0.00143483	0.0493013	148.75	148.198	0.00453055	0.973784	0.999695	9330132A10Rik	18	89293502	89297229	-	3727	pseudogene	RIKEN cDNA 9330132A10 gene [Source:MGI Symbol;Acc:MGI:2442380]	-
ENSMUSG00000026688	125.942	164.139	-0.382545	0.032094	0.624842	142.45	129.584	0.136964	0.537112	0.916213	159.982	127.813	0.325388	0.0611337	0.501403	139.473	128.942	0.113213	0.485946	0.999695	Mgst3	1	167371966	167393841	-	1097	protein_coding	microsomal glutathione S-transferase 3 [Source:MGI Symbol;Acc:MGI:1913697]	-
ENSMUSG00000048332	296.822	353.995	-0.254253	0.0321372	0.624842	334.904	305.383	0.132853	0.211488	0.745358	306.535	301.233	0.0227474	0.843704	0.973113	312.475	303.892	0.0398228	0.670677	0.999695	Lhfp	3	53041528	53261679	+	5108	protein_coding	lipoma HMGIC fusion partner [Source:MGI Symbol;Acc:MGI:1920048]	-
ENSMUSG00000042594	316.503	268.187	0.239406	0.0321149	0.624842	301.352	325.535	-0.111244	0.224269	0.755364	317.552	321.215	-0.0168213	0.86889	0.978304	335.506	323.991	0.0504431	0.573368	0.999695	Sh2b3	5	121815488	121837646	-	4807	protein_coding	SH2B adaptor protein 3 [Source:MGI Symbol;Acc:MGI:893598]	-
ENSMUSG00000004032	417.448	502.854	-0.268151	0.0321765	0.625001	586.508	429.536	0.449136	5.90852e-05	0.00811013	520.148	423.674	0.296108	0.00792258	0.164225	517.384	427.385	0.275834	0.012531	0.999695	Gstm5	3	107895821	107898686	+	1278	protein_coding	glutathione S-transferase, mu 5 [Source:MGI Symbol;Acc:MGI:1309466]	-
ENSMUSG00000024909	213.797	157.863	0.437548	0.0322289	0.625414	225.323	219.956	0.0346238	0.82261	0.971246	195.558	216.966	-0.148688	0.374323	0.845435	203.636	218.894	-0.10458	0.453686	0.999695	Efemp2	19	5473973	5481853	+	2648	protein_coding	epidermal growth factor-containing fibulin-like extracellular matrix protein 2 [Source:MGI Symbol;Acc:MGI:1891209]	-
ENSMUSG00000033419	5778.64	6332.93	-0.132134	0.032266	0.625531	5651.33	5944.51	-0.0729846	0.327017	0.829629	6238.02	5864.7	0.0889108	0.0957511	0.59433	5757.38	5915.74	-0.0391985	0.435819	0.999695	Snap91	9	86765923	86880654	-	9126	protein_coding	synaptosomal-associated protein 91 [Source:MGI Symbol;Acc:MGI:109132]	-
ENSMUSG00000027296	7.3782	17.1054	-1.21285	0.0323155	0.625788	9.96007	7.59716	0.390031	0.392739	0.861981	11.9549	7.48858	0.679064	0.241561	0.771144	10.9	7.5557	0.524489	0.287494	1	Itpka	2	119742337	119751263	+	1818	protein_coding	inositol 1,4,5-trisphosphate 3-kinase A [Source:MGI Symbol;Acc:MGI:1333822]	-
ENSMUSG00000044816	18.0853	29.5175	-0.704425	0.0323415	0.625788	26.6694	18.602	0.517116	0.0891437	0.580257	20.4601	18.3533	0.158847	0.670763	0.942275	21.3081	18.5149	0.197544	0.573717	0.999695	D630023F18Rik	1	65105285	65123214	-	2667	protein_coding	RIKEN cDNA D630023F18 gene [Source:MGI Symbol;Acc:MGI:2138198]	-
ENSMUSG00000020388	203.121	144.75	0.489931	0.0326151	0.62612	230.897	209.076	0.143368	0.510576	0.906866	118.281	206.157	-0.800274	2.3092e-05	0.00169286	207.251	207.983	-0.00576898	0.971024	0.999695	Pdlim4	11	54054928	54069014	-	2560	protein_coding	PDZ and LIM domain 4 [Source:MGI Symbol;Acc:MGI:1353470]	-
ENSMUSG00000059146	463.421	603.157	-0.380052	0.0327178	0.62612	513.896	476.511	0.108899	0.470479	0.891195	681.197	470.304	0.534378	4.14546e-05	0.002785	473.077	474.341	-0.00378155	0.976733	0.999695	Ntrk3	7	78175959	78738012	-	30170	protein_coding	neurotrophic tyrosine kinase, receptor, type 3 [Source:MGI Symbol;Acc:MGI:97385]	-
ENSMUSG00000046807	291.124	348.21	-0.257856	0.0326077	0.62612	282.936	299.394	-0.0817822	0.588021	0.927943	383.135	295.434	0.37428	0.000990606	0.0372197	306.845	298.018	0.04156	0.682145	0.999695	Lrrc75b	10	75550123	75560330	-	4603	protein_coding	leucine rich repeat containing 75B [Source:MGI Symbol;Acc:MGI:2143657]	-
ENSMUSG00000067714	2.34396	6.72969	-1.52382	0.0325612	0.62612	9.17109	2.40936	1.9303	0.00257531	0.0919916	10.0325	2.37829	2.07249	0.00178653	0.0581876	2.97007	2.39899	0.307505	0.69368	1	Lpar5	6	125067920	125082472	+	1515	protein_coding	lysophosphatidic acid receptor 5 [Source:MGI Symbol;Acc:MGI:2685918]	-
ENSMUSG00000050105	51.0115	28.3622	0.845405	0.0324217	0.62612	42.9327	52.5257	-0.291328	0.285998	0.804336	26.0306	51.7742	-0.985477	0.0142113	0.237976	44.4548	52.2381	-0.233133	0.363109	0.999695	Grrp1	4	134251110	134254106	-	1275	protein_coding	glycine/arginine rich protein 1 [Source:MGI Symbol;Acc:MGI:1919940]	-
ENSMUSG00000071317	150.141	195.138	-0.377044	0.0324947	0.62612	181.73	154.412	0.234477	0.13827	0.663432	188.49	152.367	0.303174	0.0447528	0.434437	175.22	153.696	0.188755	0.187383	0.999695	Bves	10	45335772	45372479	+	4610	protein_coding	blood vessel epicardial substance [Source:MGI Symbol;Acc:MGI:1346013]	-
ENSMUSG00000040112	234.045	283.059	-0.274822	0.0325239	0.62612	284.98	240.767	0.244515	0.0360028	0.403288	267.496	237.536	0.173236	0.115929	0.631635	259.916	239.598	0.1183	0.226075	0.999695	Mrps35	6	147042764	147073991	+	8631	protein_coding	mitochondrial ribosomal protein S35 [Source:MGI Symbol;Acc:MGI:2385255]	-
ENSMUSG00000000266	275.982	364.336	-0.400436	0.0326351	0.62612	298.084	283.785	0.0707403	0.623119	0.938352	320.259	280.075	0.193628	0.135311	0.662438	314.235	282.5	0.154111	0.170274	0.999695	Mid2	X	140664599	140767715	+	8114	protein_coding	midline 2 [Source:MGI Symbol;Acc:MGI:1344333]	-
ENSMUSG00000026696	1031.22	1191.27	-0.207875	0.0325319	0.62612	1146.07	1060.98	0.111218	0.154208	0.68162	1133.81	1046.58	0.114614	0.205795	0.740804	1138.89	1055.76	0.109339	0.123582	0.999695	Vamp4	1	162570515	162599084	+	4565	protein_coding	vesicle-associated membrane protein 4 [Source:MGI Symbol;Acc:MGI:1858730]	-
ENSMUSG00000058818	27.3929	15.4536	0.831368	0.0326709	0.62612	91.8653	28.1877	1.70516	7.65851e-06	0.00187424	18.5186	27.8006	-0.578802	0.21437	0.748912	48.4532	28.0484	0.789902	0.0519949	0.999695	Pirb	7	3711409	3720391	-	4471	protein_coding	paired Ig-like receptor B [Source:MGI Symbol;Acc:MGI:894311]	-
ENSMUSG00000020892	110.948	84.5423	0.392947	0.0327324	0.62612	112.071	114.099	-0.0253028	0.873583	0.97848	102.22	112.603	-0.135577	0.508697	0.896323	124.025	113.565	0.126196	0.456112	0.999695	Aloxe3	11	69125896	69149115	+	6397	protein_coding	arachidonate lipoxygenase 3 [Source:MGI Symbol;Acc:MGI:1345140]	-
ENSMUSG00000022364	142.728	113.504	0.329946	0.0327319	0.62612	139.216	146.787	-0.0783117	0.562966	0.920954	152.577	144.848	0.0760245	0.575615	0.917738	127.657	146.105	-0.195001	0.102641	0.999695	Tbc1d31	15	57912199	57970067	+	6366	protein_coding	TBC1 domain family, member 31 [Source:MGI Symbol;Acc:MGI:2684931]	-
ENSMUSG00000026094	310.857	368.683	-0.246517	0.0329523	0.629728	351.603	319.785	0.137068	0.152852	0.679298	330.969	315.493	0.070571	0.475378	0.884139	355.992	318.224	0.161425	0.102024	0.999695	Stk17b	1	53755506	53785224	-	5185	protein_coding	serine/threonine kinase 17b (apoptosis-inducing) [Source:MGI Symbol;Acc:MGI:2138162]	-
ENSMUSG00000029168	601.14	733.53	-0.287395	0.0331507	0.630754	637.805	618.339	0.0443519	0.596672	0.930808	800.693	610.056	0.391944	7.01845e-06	0.000612238	609.844	615.413	-0.013088	0.858942	0.999695	Dpysl5	5	30711564	30799375	+	7376	protein_coding	dihydropyrimidinase-like 5 [Source:MGI Symbol;Acc:MGI:1929772]	-
ENSMUSG00000020732	71.8967	96.0761	-0.417435	0.0330663	0.630754	62.1789	73.9808	-0.251538	0.184369	0.719738	91.4117	72.9706	0.321825	0.140417	0.669537	70.9026	73.6088	-0.0570638	0.751157	0.999695	Rab37	11	115091431	115162236	+	5330	protein_coding	RAB37, member RAS oncogene family [Source:MGI Symbol;Acc:MGI:1929945]	-
ENSMUSG00000031703	1288.24	1563.04	-0.278812	0.0331312	0.630754	1380.51	1324.95	0.0592342	0.425744	0.871236	1404.47	1307.4	0.102814	0.199424	0.733675	1345.22	1318.7	0.0288943	0.617777	0.999695	Itfg1	8	85717578	85840921	-	11045	protein_coding	integrin alpha FG-GAP repeat containing 1 [Source:MGI Symbol;Acc:MGI:106419]	-
ENSMUSG00000025759	379.759	457.382	-0.267746	0.0331062	0.630754	383.154	390.574	-0.0282268	0.811046	0.968508	418.884	385.405	0.118839	0.25818	0.784351	402.79	388.742	0.0512232	0.545987	0.999695	Mfsd8	3	40818103	40846886	-	9414	protein_coding	major facilitator superfamily domain containing 8 [Source:MGI Symbol;Acc:MGI:1919425]	-
ENSMUSG00000097527	26.9112	41.1262	-0.607602	0.0331943	0.630754	27.3296	27.6911	-0.0169935	0.954273	0.991363	31.2265	27.3136	0.198623	0.488864	0.888494	42.9542	27.5517	0.639394	0.00576829	0.8053	1700112J16Rik	7	67204082	67222536	-	2490	lincRNA	RIKEN cDNA 1700112J16 gene [Source:MGI Symbol;Acc:MGI:1923878]	-
ENSMUSG00000058099	30.6995	18.7972	0.715662	0.0331868	0.630754	42.99	31.5777	0.443762	0.122069	0.638976	30.1615	31.1557	-0.0422886	0.873453	0.978353	33.9302	31.428	0.109957	0.708646	0.999695	Nfam1	15	82992973	83033306	-	7970	protein_coding	Nfat activating molecule with ITAM motif 1 [Source:MGI Symbol;Acc:MGI:1921289]	-
ENSMUSG00000074981	71.9756	104.641	-0.539271	0.0334298	0.634629	59.3452	73.9853	-0.319162	0.266438	0.790063	82.9479	73.0416	0.18104	0.537836	0.903863	69.6108	73.6639	-0.0821038	0.666744	0.999695	Dcdc5	2	106003336	106406151	+	9014	transcribed_unitary_pseudogene	doublecortin domain containing 5 [Source:MGI Symbol;Acc:MGI:3045363]	-
ENSMUSG00000062908	1541.77	1759.88	-0.190921	0.0335716	0.635685	1777.86	1586.11	0.164626	0.0245151	0.333472	1781.39	1564.7	0.18725	0.0107959	0.199624	1757.82	1578.42	0.155142	0.0103232	0.999695	Acadm	3	153922357	153944632	-	3913	protein_coding	acyl-Coenzyme A dehydrogenase, medium chain [Source:MGI Symbol;Acc:MGI:87867]	-
ENSMUSG00000038894	926.725	790.627	0.229167	0.0336119	0.635685	831.272	953.074	-0.197459	0.082349	0.562557	957.863	940.493	0.0270042	0.752918	0.959142	939.353	948.632	-0.0140978	0.859667	0.999695	Irs2	8	10984681	11008458	-	6323	protein_coding	insulin receptor substrate 2 [Source:MGI Symbol;Acc:MGI:109334]	-
ENSMUSG00000032038	409.685	322.774	0.344575	0.0335955	0.635685	428.795	421.565	0.0241215	0.834093	0.972958	427.124	415.788	0.0399308	0.774746	0.96301	400.579	419.447	-0.0668411	0.525927	0.999695	St3gal4	9	35046576	35119268	-	2923	protein_coding	ST3 beta-galactoside alpha-2,3-sialyltransferase 4 [Source:MGI Symbol;Acc:MGI:1316743]	-
ENSMUSG00000044701	9.01528	2.8126	1.69309	0.0336118	0.635685	13.135	9.27768	0.503706	0.318104	0.82531	8.89511	9.14922	-0.0303533	0.968022	0.993984	12.1342	9.23099	0.39397	0.363561	0.999695	Il27	7	126589010	126594941	-	1021	protein_coding	interleukin 27 [Source:MGI Symbol;Acc:MGI:2384409]	-
ENSMUSG00000028776	38.8142	23.5755	0.717161	0.0336859	0.636487	36.364	39.9548	-0.136571	0.629835	0.939792	30.0014	39.3927	-0.390353	0.246457	0.774708	35.9953	39.7465	-0.144922	0.626359	0.999695	Tinagl1	4	130164454	130175122	-	4358	protein_coding	tubulointerstitial nephritis antigen-like 1 [Source:MGI Symbol;Acc:MGI:2137617]	-
ENSMUSG00000114917	68.1318	47.4394	0.521148	0.0338652	0.638376	61.5784	70.0554	-0.189369	0.435482	0.874895	52.7221	69.1339	-0.391307	0.0711255	0.535906	64.9158	69.7465	-0.105025	0.621861	0.999695	Gm48250	13	46881027	46884898	+	771	antisense	predicted gene, 48250 [Source:MGI Symbol;Acc:MGI:6097663]	-
ENSMUSG00000024854	132.609	94.4391	0.488296	0.033821	0.638376	157.215	136.458	0.204373	0.255046	0.77938	115.032	134.58	-0.224788	0.233565	0.763989	148.017	135.778	0.122834	0.399594	0.999695	Pold4	19	4231899	4233631	+	910	protein_coding	polymerase (DNA-directed), delta 4 [Source:MGI Symbol;Acc:MGI:1916995]	-
ENSMUSG00000035621	830.681	617.009	0.428719	0.0338812	0.638376	855.238	854.523	0.000932676	0.991837	0.998935	777.071	842.997	-0.116696	0.352196	0.835515	805.25	850.448	-0.0787656	0.355801	0.999695	Midn	10	80148272	80158368	+	4307	protein_coding	midnolin [Source:MGI Symbol;Acc:MGI:1890222]	-
ENSMUSG00000006586	426.315	526.525	-0.304483	0.0340236	0.639804	486.999	438.465	0.151388	0.295433	0.811729	545.595	432.669	0.333627	0.00601715	0.138045	451.223	436.382	0.048812	0.589339	0.999695	Runx1t1	4	13743436	13893649	+	7959	protein_coding	runt-related transcription factor 1; translocated to, 1 (cyclin D-related) [Source:MGI Symbol;Acc:MGI:104793]	-
ENSMUSG00000032577	66.2494	43.9974	0.589752	0.0340524	0.639804	90.1772	68.1906	0.403617	0.139473	0.665085	46.5717	67.2374	-0.528183	0.0537813	0.473738	67.3455	67.8372	-0.0118173	0.953376	0.999695	Mapkapk3	9	107254927	107289877	-	5542	protein_coding	mitogen-activated protein kinase-activated protein kinase 3 [Source:MGI Symbol;Acc:MGI:2143163]	-
ENSMUSG00000072066	20.5925	32.0695	-0.641355	0.034021	0.639804	27.789	21.1767	0.396508	0.144379	0.670865	23.3078	20.8997	0.149774	0.66118	0.940495	25.0284	21.0774	0.248297	0.368891	0.999695	6720489N17Rik	13	62603013	62624182	-	2701	protein_coding	RIKEN cDNA 6720489N17 gene [Source:MGI Symbol;Acc:MGI:2443901]	-
ENSMUSG00000069114	331.394	422.844	-0.350908	0.0341054	0.640201	350.858	340.894	0.0414319	0.753537	0.960026	375.137	336.339	0.155768	0.239644	0.768185	356.529	339.235	0.0724631	0.441421	0.999695	Zbtb10	3	9250602	9285333	+	7414	protein_coding	zinc finger and BTB domain containing 10 [Source:MGI Symbol;Acc:MGI:2139883]	-
ENSMUSG00000024277	3501.25	3886.21	-0.15057	0.0342622	0.641348	3616.51	3601.49	0.00602562	0.943267	0.990587	3940.08	3553.39	0.148855	0.0114335	0.207351	3636.12	3584.2	0.0208539	0.626603	0.999695	Mapre2	18	23752333	23893861	+	10202	protein_coding	microtubule-associated protein, RP/EB family, member 2 [Source:MGI Symbol;Acc:MGI:106271]	-
ENSMUSG00000032446	75.4976	103.948	-0.464428	0.0342305	0.641348	98.501	77.6471	0.344858	0.0320869	0.380871	95.1388	76.6186	0.312301	0.0798218	0.556355	82.7564	77.2857	0.101227	0.578922	0.999695	Eomes	9	118478212	118486132	+	4155	protein_coding	eomesodermin [Source:MGI Symbol;Acc:MGI:1201683]	T-box
ENSMUSG00000034612	132.827	165.402	-0.315506	0.0342056	0.641348	159.086	136.608	0.219141	0.193049	0.724897	153.578	134.795	0.186154	0.256985	0.783911	139.102	135.975	0.0323443	0.82864	0.999695	Chst11	10	82985498	83195900	+	5527	protein_coding	carbohydrate sulfotransferase 11 [Source:MGI Symbol;Acc:MGI:1927166]	-
ENSMUSG00000052430	157.513	217.671	-0.46557	0.0343495	0.64187	185.772	161.997	0.19778	0.284605	0.803332	178.564	159.861	0.159202	0.235161	0.764867	162.473	161.228	0.0102841	0.951217	0.999695	Bmpr1b	3	141837136	142169425	-	5962	protein_coding	bone morphogenetic protein receptor, type 1B [Source:MGI Symbol;Acc:MGI:107191]	-
ENSMUSG00000001507	500.578	389.419	0.362268	0.034354	0.64187	494.429	514.839	-0.0583892	0.546988	0.91705	478.601	507.989	-0.0854882	0.435416	0.870726	482.255	512.443	-0.0876606	0.435062	0.999695	Itga3	11	95044474	95076801	-	5710	protein_coding	integrin alpha 3 [Source:MGI Symbol;Acc:MGI:96602]	-
ENSMUSG00000096150	0.383556	10.2529	-4.67896	0.0343899	0.641945	15.5754	0.397219	5.24251	0.020859	0.305132	0	0.389515	-1.14673	0.732309	1	16.4339	0.393545	5.32613	0.0266187	1	Ighv1-85	12	116000028	116000461	-	351	IG_V_gene	immunoglobulin heavy variable 1-85 [Source:MGI Symbol;Acc:MGI:3645723]	-
ENSMUSG00000077711	10.9375	4.66153	1.21491	0.0344771	0.64238	3.50499	11.2593	-1.67692	0.00386726	0.117523	8.23526	11.1019	-0.433316	0.357017	0.839238	7.4308	11.1994	-0.584931	0.25704	1	AF357399	7	28351508	28351632	+	125	snoRNA	snoRNA AF357399 [Source:MGI Symbol;Acc:MGI:5439844]	-
ENSMUSG00000097580	4.91801	10.7444	-1.13411	0.0344649	0.64238	7.13273	5.05985	0.494984	0.394814	0.861981	5.63029	4.9922	0.161327	0.807516	0.968019	9.4909	5.03446	0.92121	0.0642959	1	Gm5432	12	15817003	15888155	+	1670	bidirectional_promoter_lncRNA	predicted gene 5432 [Source:MGI Symbol;Acc:MGI:3649057]	-
ENSMUSG00000027004	359.499	477.398	-0.408616	0.0345657	0.643434	424.29	369.812	0.197601	0.0483478	0.456831	422.926	364.843	0.212594	0.0194208	0.284261	416.212	368.04	0.176704	0.0303532	0.999695	Frzb	2	80411970	80447625	-	3237	protein_coding	frizzled-related protein [Source:MGI Symbol;Acc:MGI:892032]	-
ENSMUSG00000021464	67.2725	44.9705	0.580606	0.0346418	0.644254	86.4953	69.2418	0.320718	0.201156	0.733312	73.0407	68.2723	0.0955707	0.652576	0.937905	63.7624	68.8876	-0.112096	0.659207	0.999695	Ror2	13	53109312	53286124	-	4242	protein_coding	receptor tyrosine kinase-like orphan receptor 2 [Source:MGI Symbol;Acc:MGI:1347521]	-
ENSMUSG00000026414	403.888	205.924	0.972218	0.0347148	0.644595	320.937	415.641	-0.373081	0.0178119	0.280438	113.325	409.922	-1.85218	3.0336e-15	1.48422e-12	320.539	413.523	-0.367857	0.0656192	0.999695	Tnnt2	1	135836354	135852260	+	7752	protein_coding	troponin T2, cardiac [Source:MGI Symbol;Acc:MGI:104597]	-
ENSMUSG00000097526	17.5398	5.03922	1.80158	0.0347242	0.644595	3.94941	18.0174	-2.19332	0.00331605	0.107417	5.17939	17.7901	-1.77791	0.0430532	0.425939	8.04202	17.9598	-1.15676	0.0888257	0.999695	Gm26847	10	128230590	128232790	-	2109	lincRNA	predicted gene, 26847 [Source:MGI Symbol;Acc:MGI:5477341]	-
ENSMUSG00000053560	391.473	281.392	0.475962	0.0347779	0.644996	414.361	402.984	0.0401021	0.84196	0.974821	332.578	397.289	-0.256114	0.206701	0.741237	372.044	400.904	-0.108123	0.576777	0.999695	Ier2	8	84661331	84662852	-	1522	protein_coding	immediate early response 2 [Source:MGI Symbol;Acc:MGI:104815]	-
ENSMUSG00000052188	19.5682	30.928	-0.659566	0.0348522	0.645777	28.136	20.1273	0.482948	0.0891039	0.580209	28.9693	19.8611	0.54377	0.120619	0.640098	23.0727	20.031	0.206696	0.529682	0.999695	Gm14964	19	6530711	6532011	-	760	antisense	predicted gene 14964 [Source:MGI Symbol;Acc:MGI:3641621]	-
ENSMUSG00000109101	55.8904	38.0661	0.549348	0.0348968	0.646009	49.9566	57.4923	-0.200951	0.464665	0.888277	63.7648	56.7313	0.173464	0.507462	0.896323	53.0926	57.2062	-0.106534	0.652254	0.999695	Gm45132	7	98678106	98680647	-	2542	TEC	predicted gene 45132 [Source:MGI Symbol;Acc:MGI:5753708]	-
ENSMUSG00000029503	28.2976	45.4001	-0.681452	0.0350287	0.647855	70.5602	29.1148	1.27257	8.16004e-08	4.27921e-05	50.9279	28.716	0.819292	0.00450518	0.114311	35.7644	28.9746	0.300111	0.253866	0.999695	P2rx2	5	110339812	110343212	-	2574	protein_coding	purinergic receptor P2X, ligand-gated ion channel, 2 [Source:MGI Symbol;Acc:MGI:2665170]	-
ENSMUSG00000020366	2079.01	2358.59	-0.18194	0.0351758	0.649379	2043.01	2138.13	-0.065817	0.474601	0.892444	2278.52	2109.89	0.110747	0.106683	0.615016	2028.18	2128.17	-0.0693279	0.255029	0.999695	Mapk9	11	49846751	49886421	+	6784	protein_coding	mitogen-activated protein kinase 9 [Source:MGI Symbol;Acc:MGI:1346862]	-
ENSMUSG00000026668	20.5695	10.9054	0.911936	0.0351617	0.649379	23.1521	21.1783	0.126152	0.731483	0.956394	15.2732	20.8766	-0.442196	0.337519	0.827335	19.7627	21.0642	-0.0941329	0.795223	0.999695	Ucma	2	4976122	4985748	+	884	protein_coding	upper zone of growth plate and cartilage matrix associated [Source:MGI Symbol;Acc:MGI:1915777]	-
ENSMUSG00000037737	3.88322	10.0939	-1.37117	0.0352712	0.650543	9.8841	3.99215	1.2992	0.022179	0.315661	9.87351	3.94069	1.32395	0.0258084	0.32892	7.31741	3.97412	0.877515	0.221241	1	Actrt3	3	30597073	30599939	-	1961	protein_coding	actin related protein T3 [Source:MGI Symbol;Acc:MGI:1923902]	-
ENSMUSG00000060591	38.4475	23.7854	0.691092	0.0353586	0.651267	87.4821	39.5524	1.14649	3.3745e-05	0.00535002	29.1342	39.0227	-0.417105	0.208588	0.743386	61.1187	39.3567	0.637245	0.0342971	0.999695	Ifitm2	7	140954837	140955987	-	655	protein_coding	interferon induced transmembrane protein 2 [Source:MGI Symbol;Acc:MGI:1933382]	-
ENSMUSG00000062169	588.173	685.99	-0.221722	0.0353753	0.651267	642.458	605.108	0.0867472	0.215367	0.747735	609.251	596.939	0.0290369	0.722661	0.952855	638.21	602.143	0.0844118	0.273171	0.999695	Cnih4	1	181144693	181168994	+	3783	protein_coding	cornichon family AMPA receptor auxiliary protein 4 [Source:MGI Symbol;Acc:MGI:1925828]	-
ENSMUSG00000074781	1489.06	1682.97	-0.176599	0.0356034	0.654867	1561.72	1531.87	0.0278577	0.668669	0.944443	1489.82	1511.27	-0.0212482	0.775612	0.963086	1434.48	1524.38	-0.0874247	0.110586	0.999695	Ube2n	10	95515145	95545657	+	4221	protein_coding	ubiquitin-conjugating enzyme E2N [Source:MGI Symbol;Acc:MGI:1934835]	-
ENSMUSG00000050967	183.13	227.449	-0.31212	0.0358377	0.658575	192.588	188.321	0.0328277	0.827411	0.972066	233.961	185.843	0.329637	0.0244982	0.320101	157.472	187.462	-0.251653	0.0554555	0.999695	Creg2	1	39618406	39651474	-	6091	protein_coding	cellular repressor of E1A-stimulated genes 2 [Source:MGI Symbol;Acc:MGI:1928333]	-
ENSMUSG00000025348	153.466	115.626	0.406381	0.0358812	0.658772	135.166	157.898	-0.224224	0.0787057	0.556024	131.916	155.751	-0.23843	0.115664	0.631635	145.928	157.119	-0.106327	0.423924	0.999695	Itga7	10	128933818	128958282	+	8092	protein_coding	integrin alpha 7 [Source:MGI Symbol;Acc:MGI:102700]	-
ENSMUSG00000051074	24.942	14.7649	0.757116	0.0360215	0.660745	17.3631	25.6836	-0.562438	0.121096	0.637959	13.4116	25.3166	-0.916709	0.0169025	0.26233	17.2451	25.5412	-0.568731	0.0684235	0.999695	4930579K19Rik	9	98562229	98563611	-	1273	processed_transcript	RIKEN cDNA 4930579K19 gene [Source:MGI Symbol;Acc:MGI:1923131]	-
ENSMUSG00000076522	58.7615	30.8933	0.930534	0.03615	0.661382	71.4592	60.4879	0.241098	0.725014	0.955714	13.6914	59.6525	-2.12883	7.60809e-05	0.00462777	24.1194	60.1616	-1.31996	0.0385456	0.999695	Igkv16-104	6	68425575	68426072	+	378	IG_V_gene	immunoglobulin kappa variable 16-104 [Source:MGI Symbol;Acc:MGI:2685913]	-
ENSMUSG00000022054	1161.69	1558.15	-0.423704	0.0361011	0.661382	1038.77	1194.86	-0.201972	0.308139	0.820473	1424.99	1178.92	0.273579	0.00347513	0.095032	1116.56	1189.23	-0.0909401	0.384841	0.999695	Nefm	14	68082590	68124846	-	5782	protein_coding	neurofilament, medium polypeptide [Source:MGI Symbol;Acc:MGI:97314]	-
ENSMUSG00000037820	189.501	141.279	0.425055	0.0361549	0.661382	301.951	195.003	0.62993	0.00145005	0.0650362	190.253	192.321	-0.0144711	0.955503	0.993021	225.917	194.023	0.218556	0.263323	0.999695	Tgm2	2	158116402	158146436	-	4608	protein_coding	transglutaminase 2, C polypeptide [Source:MGI Symbol;Acc:MGI:98731]	-
ENSMUSG00000019861	585.225	678.143	-0.212444	0.036195	0.661514	589.727	601.919	-0.0296009	0.80169	0.968199	567.65	593.941	-0.0659725	0.432102	0.868932	583.467	599.061	-0.0376943	0.612027	0.999695	Gopc	10	52335850	52382124	-	10958	protein_coding	golgi associated PDZ and coiled-coil motif containing [Source:MGI Symbol;Acc:MGI:2149946]	-
ENSMUSG00000008734	458.836	550.069	-0.262008	0.0362743	0.66236	490.413	471.912	0.0551267	0.585454	0.927943	520.683	465.635	0.160529	0.097453	0.59841	456.484	469.711	-0.0409726	0.628973	0.999695	Gprc5b	7	118972047	118995211	-	4630	protein_coding	G protein-coupled receptor, family C, group 5, member B [Source:MGI Symbol;Acc:MGI:1927596]	-
ENSMUSG00000046318	18.4186	9.31489	0.985372	0.0363654	0.662819	9.63423	18.9375	-0.975053	0.0158421	0.267742	7.78235	18.6925	-1.28658	0.0180326	0.273478	13.5443	18.8498	-0.478887	0.238531	0.999695	Ccbe1	18	66045302	66302739	-	9511	protein_coding	collagen and calcium binding EGF domains 1 [Source:MGI Symbol;Acc:MGI:2445053]	-
ENSMUSG00000091264	2243.13	2654.55	-0.242852	0.0363509	0.662819	2471.55	2307.52	0.0990354	0.0877008	0.576126	2488.92	2276.56	0.128186	0.0761453	0.548409	2374.18	2296.32	0.0479852	0.352338	0.999695	Smim13	13	41249844	41276577	+	4483	protein_coding	small integral membrane protein 13 [Source:MGI Symbol;Acc:MGI:2652854]	-
ENSMUSG00000020773	50.9794	33.0041	0.627776	0.0365352	0.665007	50.0367	52.4842	-0.0685928	0.797844	0.967931	37.4569	51.7379	-0.46617	0.095691	0.59433	48.0842	52.2063	-0.12004	0.618135	0.999695	Trim47	11	116105752	116127210	-	2735	protein_coding	tripartite motif-containing 47 [Source:MGI Symbol;Acc:MGI:1917374]	-
ENSMUSG00000087635	34.8749	53.7627	-0.621021	0.0365516	0.665007	35.2136	35.8712	-0.0264644	0.924143	0.986849	42.9472	35.3962	0.27243	0.488512	0.888494	43.7504	35.6969	0.291967	0.238249	0.999695	Gm13414	2	34649514	34650240	-	727	processed_pseudogene	predicted gene 13414 [Source:MGI Symbol;Acc:MGI:3652154]	-
ENSMUSG00000108900	21.6225	9.90469	1.13303	0.0366406	0.665423	19.836	22.2748	-0.167998	0.687493	0.94974	5.13271	21.9457	-2.08703	0.00134363	0.0468431	13.8507	22.1487	-0.678053	0.068787	0.999695	Ccdc194	8	71520120	71525711	-	1820	protein_coding	coiled-coil domain containing 194 [Source:MGI Symbol;Acc:MGI:3588239]	-
ENSMUSG00000030878	2894.31	3294.56	-0.186899	0.0366263	0.665423	3061.27	2977.6	0.0398861	0.579458	0.926806	3186.53	2937.37	0.117185	0.138515	0.667561	3119.3	2963.09	0.0740537	0.22682	0.999695	Cdr2	7	120957036	120982312	-	5684	protein_coding	cerebellar degeneration-related 2 [Source:MGI Symbol;Acc:MGI:1100885]	-
ENSMUSG00000041205	77.7929	99.9579	-0.361567	0.0369293	0.665593	97.7452	80.0019	0.286946	0.0936367	0.590507	104.358	78.9445	0.403217	0.0114154	0.207351	97.4522	79.6346	0.288783	0.0712585	0.999695	Map6d1	16	20233303	20241358	-	3280	protein_coding	MAP6 domain containing 1 [Source:MGI Symbol;Acc:MGI:3607784]	-
ENSMUSG00000010803	1753.83	2070.29	-0.239213	0.0369717	0.665593	1831.13	1803.92	0.0215799	0.863871	0.977855	2034.81	1779.91	0.192564	0.0628723	0.506411	1837.24	1795.36	0.0334751	0.496915	0.999695	Gabra1	11	42130939	42182930	-	7326	protein_coding	gamma-aminobutyric acid (GABA) A receptor, subunit alpha 1 [Source:MGI Symbol;Acc:MGI:95613]	-
ENSMUSG00000041241	752.383	639.478	0.234232	0.0369726	0.665593	718.147	774.04	-0.10803	0.222544	0.753803	693.27	763.569	-0.13837	0.1115	0.621964	756.56	770.277	-0.0259673	0.723729	0.999695	Mul1	4	138434671	138442265	+	4000	protein_coding	mitochondrial ubiquitin ligase activator of NFKB 1 [Source:MGI Symbol;Acc:MGI:1915600]	-
ENSMUSG00000069132	16.4597	25.8516	-0.652342	0.0368418	0.665593	25.3993	16.9382	0.585135	0.0466398	0.451432	24.1178	16.7072	0.521558	0.144002	0.67225	21.9896	16.8504	0.390121	0.243337	0.999695	Nxph2	2	23321246	23401973	+	2579	protein_coding	neurexophilin 2 [Source:MGI Symbol;Acc:MGI:107491]	-
ENSMUSG00000105813	9.34114	4.02044	1.22102	0.0367315	0.665593	11.3994	9.60541	0.237202	0.644935	0.94103	5.31984	9.47849	-0.81536	0.1599	0.689616	7.85667	9.56305	-0.281032	0.571523	1	Gm42928	3	121424236	121427574	-	3339	TEC	predicted gene 42928 [Source:MGI Symbol;Acc:MGI:5663065]	-
ENSMUSG00000045075	4.63989	10.981	-1.23704	0.0369811	0.665593	7.04187	4.76875	0.557212	0.380909	0.8558	6.80079	4.70799	0.535822	0.428609	0.866427	7.85726	4.74917	0.722925	0.211259	1	Gm9796	11	95696894	95699143	-	2250	lincRNA	predicted gene 9796 [Source:MGI Symbol;Acc:MGI:3648412]	-
ENSMUSG00000031099	317.26	379.809	-0.258872	0.0368071	0.665593	341.215	326.293	0.0633094	0.590799	0.928658	304.728	321.967	-0.082022	0.49302	0.889729	316.592	324.77	-0.0369533	0.650257	0.999695	Smarca1	X	47809368	47892974	-	6118	protein_coding	SWI/SNF related, matrix associated, actin dependent regulator of chromatin, subfamily a, member 1 [Source:MGI Symbol;Acc:MGI:1935127]	-
ENSMUSG00000029703	341.646	270.533	0.335924	0.0368996	0.665593	321.353	351.517	-0.128649	0.307809	0.820022	332.066	346.759	-0.0608954	0.613947	0.928541	325.089	349.748	-0.104778	0.306084	0.999695	Lrwd1	5	136122772	136136074	-	6943	protein_coding	leucine-rich repeats and WD repeat domain containing 1 [Source:MGI Symbol;Acc:MGI:1918985]	-
ENSMUSG00000001510	33.1806	18.1487	0.873294	0.0368527	0.665593	52.3316	34.154	0.61446	0.0977937	0.59597	32.3515	33.6759	-0.0539754	0.924763	0.989038	59.8999	33.9743	0.817538	0.0169043	0.999695	Dlx3	11	95120119	95125296	+	2607	protein_coding	distal-less homeobox 3 [Source:MGI Symbol;Acc:MGI:94903]	Homeobox
ENSMUSG00000030208	30.6199	16.8874	0.858241	0.036932	0.665593	24.3369	31.5141	-0.368871	0.284907	0.803441	126.849	31.0872	2.02822	NA	1	24.4765	31.341	-0.352098	0.325005	0.999695	Emp1	6	135362545	135383173	+	5935	protein_coding	epithelial membrane protein 1 [Source:MGI Symbol;Acc:MGI:107941]	-
ENSMUSG00000023947	84.9637	64.5446	0.398187	0.0371705	0.667807	99.4002	87.3961	0.186496	0.359335	0.845793	70.3763	86.2232	-0.290814	0.0975542	0.5985	80.8256	86.9843	-0.106512	0.497051	0.999695	Nfkbie	17	45555703	45563169	+	3045	protein_coding	nuclear factor of kappa light polypeptide gene enhancer in B cells inhibitor, epsilon [Source:MGI Symbol;Acc:MGI:1194908]	-
ENSMUSG00000059897	186.489	238.729	-0.354818	0.037157	0.667807	201.676	191.854	0.0711788	0.55026	0.917639	201.42	189.27	0.086702	0.566389	0.914708	195.711	190.915	0.0342307	0.760343	0.999695	Zfp930	8	69209038	69230536	+	5216	protein_coding	zinc finger protein 930 [Source:MGI Symbol;Acc:MGI:2675306]	zf-C2H2
ENSMUSG00000020114	2275.23	2802.33	-0.300494	0.0373441	0.669842	2364.54	2340.19	0.0149149	0.85973	0.977424	2554.03	2309.08	0.145116	0.0619865	0.502611	2402.08	2329.08	0.0444806	0.420938	0.999695	Cand1	10	119199255	119240055	-	8357	protein_coding	cullin associated and neddylation disassociated 1 [Source:MGI Symbol;Acc:MGI:1261820]	-
ENSMUSG00000042613	1327.8	1043.74	0.347471	0.0373504	0.669842	1483.98	1366.38	0.119009	0.40188	0.861981	1107.66	1347.54	-0.282451	0.0695989	0.529724	1401.73	1359.53	0.0438798	0.720068	0.999695	Pbxip1	3	89436706	89450952	+	4674	protein_coding	pre B cell leukemia transcription factor interacting protein 1 [Source:MGI Symbol;Acc:MGI:2441670]	-
ENSMUSG00000055963	111.258	144.356	-0.374191	0.037422	0.670382	131.603	114.431	0.201125	0.246079	0.769825	143.028	112.918	0.339959	0.0336793	0.381653	111.224	113.882	-0.0344308	0.816417	0.999695	Triqk	4	12906838	12983553	+	3568	protein_coding	triple QxxK/R motif containing [Source:MGI Symbol;Acc:MGI:3650048]	-
ENSMUSG00000081052	10.3723	4.72577	1.12721	0.0374472	0.670382	4.93145	10.6682	-1.11661	0.0233928	0.3248	5.40415	10.5265	-0.951857	0.0902599	0.584572	8.16847	10.6174	-0.381333	0.426597	1	Gm6305	16	11190254	11191265	-	1012	processed_pseudogene	predicted gene 6305 [Source:MGI Symbol;Acc:MGI:3644967]	-
ENSMUSG00000037463	695.953	606.656	0.197402	0.0375975	0.672473	697.904	715.863	-0.0370208	0.695404	0.950695	766.484	706.313	0.118914	0.132225	0.658443	691.331	712.444	-0.0437939	0.586183	0.999695	Fbxo27	7	28692849	28699338	+	3062	protein_coding	F-box protein 27 [Source:MGI Symbol;Acc:MGI:2685007]	-
ENSMUSG00000029405	1380.63	1594.86	-0.207806	0.0376345	0.672537	1360.2	1420.02	-0.0624289	0.443845	0.878923	1429.4	1401.11	0.0280853	0.713255	0.950922	1403.08	1413.36	-0.0110416	0.85403	0.999695	G3bp2	5	92052146	92083719	-	8659	protein_coding	GTPase activating protein (SH3 domain) binding protein 2 [Source:MGI Symbol;Acc:MGI:2442040]	-
ENSMUSG00000027204	420.225	296.961	0.501551	0.0376695	0.672565	438.122	431.931	0.0204292	0.933251	0.989228	331.76	426.44	-0.362871	0.107613	0.617272	471.177	430.087	0.13158	0.440701	0.999695	Fbn1	2	125300594	125507993	-	12128	protein_coding	fibrillin 1 [Source:MGI Symbol;Acc:MGI:95489]	-
ENSMUSG00000094335	119.234	35.3171	1.75611	0.0377406	0.673235	111.888	122.776	-0.133512	0.868102	0.97848	24.2172	121.074	-2.31975	0.0159243	0.25328	172.911	122.061	0.502485	0.672901	0.999695	Igkv1-117	6	68121046	68121827	+	404	IG_V_gene	immunoglobulin kappa variable 1-117 [Source:MGI Symbol;Acc:MGI:4439721]	-
ENSMUSG00000037035	79.1349	52.8616	0.581195	0.0377754	0.673259	96.9467	81.3952	0.252045	0.244218	0.768186	71.0787	80.3036	-0.173782	0.537309	0.903863	107.641	81.0231	0.410039	0.101776	0.999695	Inhbb	1	119415465	119422248	-	4255	protein_coding	inhibin beta-B [Source:MGI Symbol;Acc:MGI:96571]	-
ENSMUSG00000026932	676.449	779.857	-0.205564	0.0379869	0.676429	808.701	695.835	0.216506	0.00470326	0.131769	805.38	686.515	0.231428	0.0226955	0.307147	695.199	692.494	0.00595511	0.934502	0.999695	Nacc2	2	26055535	26123220	-	7815	protein_coding	nucleus accumbens associated 2, BEN and BTB (POZ) domain containing [Source:MGI Symbol;Acc:MGI:1915241]	-
ENSMUSG00000052105	5866.9	5072.54	0.20989	0.0381448	0.67864	5426.09	6035.13	-0.153524	0.0629431	0.509325	5158.07	5954	-0.207014	0.0107895	0.199624	5814.73	6006.26	-0.0468702	0.406691	0.999695	Mtcl1	17	66336982	66449750	-	9226	protein_coding	microtubule crosslinking factor 1 [Source:MGI Symbol;Acc:MGI:1915867]	-
ENSMUSG00000068739	2659.43	2246.16	0.243534	0.0382417	0.679162	2181.82	2736.47	-0.326707	0.00167695	0.0720803	2061.04	2699.1	-0.388973	7.2308e-06	0.000625909	2561.03	2722.77	-0.0883578	0.259451	0.999695	Sars	3	108424865	108445209	-	5142	protein_coding	seryl-aminoacyl-tRNA synthetase [Source:MGI Symbol;Acc:MGI:102809]	-
ENSMUSG00000091329	6.41693	2.22575	1.51855	0.0382209	0.679162	6.85342	6.59639	0.0534543	0.926665	0.987326	4.18366	6.51085	-0.667674	0.378565	0.847439	3.56222	6.56825	-0.885715	0.125292	1	1700112D23Rik	3	28702667	28781108	-	723	antisense	RIKEN cDNA 1700112D23 gene [Source:MGI Symbol;Acc:MGI:1920861]	-
ENSMUSG00000078566	1247.44	1517.36	-0.282373	0.0385023	0.681062	1375.59	1283.43	0.0997677	0.40279	0.861981	1421.55	1265.98	0.166808	0.0882584	0.579616	1250.23	1277.17	-0.0309798	0.791949	0.999695	Bnip3	7	138890836	138909519	-	2265	protein_coding	BCL2/adenovirus E1B interacting protein 3 [Source:MGI Symbol;Acc:MGI:109326]	-
ENSMUSG00000003418	20.5806	34.6816	-0.753203	0.038552	0.681062	19.142	21.1535	-0.141307	0.721785	0.955714	29.2809	20.8843	0.48662	0.16214	0.692829	22.3604	21.064	0.0879315	0.791835	0.999695	St8sia6	2	13651021	13794064	-	7664	protein_coding	ST8 alpha-N-acetyl-neuraminide alpha-2,8-sialyltransferase 6 [Source:MGI Symbol;Acc:MGI:2386797]	-
ENSMUSG00000056531	6.48909	15.3281	-1.24253	0.038477	0.681062	11.273	6.67167	0.757229	0.184981	0.719829	11.4606	6.58781	0.793963	0.192019	0.725366	13.6757	6.63958	1.04608	0.0336003	0.999695	Ccdc18	5	108132875	108233628	+	6433	protein_coding	coiled-coil domain containing 18 [Source:MGI Symbol;Acc:MGI:1922974]	-
ENSMUSG00000006369	593.806	122.268	2.28013	0.038428	0.681062	836.98	610.092	0.456149	0.478967	0.893985	255.603	602.535	-1.23722	0.222526	0.756637	847.395	607.706	0.479628	0.203934	0.999695	Fbln1	15	85205949	85286535	+	4368	protein_coding	fibulin 1 [Source:MGI Symbol;Acc:MGI:95487]	-
ENSMUSG00000031217	290.781	229.62	0.340105	0.0385258	0.681062	310.175	299.172	0.0513291	0.653903	0.942036	279.818	295.109	-0.0775735	0.50411	0.894855	307.845	297.698	0.047958	0.668904	0.999695	Efnb1	X	99136130	99148991	+	3452	protein_coding	ephrin B1 [Source:MGI Symbol;Acc:MGI:102708]	-
ENSMUSG00000036613	337.123	400.062	-0.247128	0.0384736	0.681062	377.494	346.823	0.122843	0.287101	0.805679	349.643	342.157	0.0309665	0.769708	0.962047	348.832	345.116	0.0158048	0.859587	0.999695	Eipr1	12	28751803	28869865	+	4998	protein_coding	EARP complex and GARP complex interacting protein 1 [Source:MGI Symbol;Acc:MGI:1289332]	-
ENSMUSG00000108829	2.3156	6.92529	-1.57603	0.0386022	0.681351	5.6948	2.38025	1.24744	0.080135	0.558986	6.44166	2.34985	1.44719	0.0647993	0.513037	6.89037	2.37023	1.53139	0.0247333	1	Vmn2r-ps89	8	4529618	4538187	-	1010	unprocessed_pseudogene	vomeronasal 2, receptor, pseudogene 89 [Source:MGI Symbol;Acc:MGI:3757941]	-
ENSMUSG00000029231	216.825	172.973	0.327419	0.0386431	0.681475	199.308	223.087	-0.162208	0.482067	0.895236	191.785	220.068	-0.199941	0.175791	0.707722	195.607	221.976	-0.181476	0.156996	0.999695	Pdgfra	5	75152292	75198215	+	10024	protein_coding	platelet derived growth factor receptor, alpha polypeptide [Source:MGI Symbol;Acc:MGI:97530]	-
ENSMUSG00000074892	134.748	167.612	-0.314043	0.0387721	0.683151	154.204	138.571	0.153358	0.215908	0.748053	190.556	136.747	0.479046	0.000124061	0.00694558	167.534	137.931	0.280636	0.0152404	0.999695	B3galt5	16	96235801	96319859	+	6159	protein_coding	UDP-Gal:betaGlcNAc beta 1,3-galactosyltransferase, polypeptide 5 [Source:MGI Symbol;Acc:MGI:2136878]	-
ENSMUSG00000000530	161.718	126.745	0.349189	0.0389474	0.685638	157.233	166.391	-0.0807588	0.549965	0.917639	118.724	164.129	-0.465847	0.000554702	0.0232913	151.281	165.568	-0.128255	0.345786	0.999695	Acvrl1	15	101128522	101145336	+	4265	protein_coding	activin A receptor, type II-like 1 [Source:MGI Symbol;Acc:MGI:1338946]	-
ENSMUSG00000105677	18.6282	33.4394	-0.838305	0.0389866	0.685728	24.4083	19.1441	0.346502	0.383286	0.856196	26.595	18.9016	0.483654	0.234215	0.764777	27.2549	19.064	0.51283	0.127123	0.999695	Gm43328	3	105732444	105733877	-	1434	sense_intronic	predicted gene 43328 [Source:MGI Symbol;Acc:MGI:5663465]	-
ENSMUSG00000095589	41.2372	8.54218	2.27193	0.0391867	0.686942	106.381	42.3628	1.32784	0.258454	0.783645	5.29275	41.8482	-2.9772	0.0132053	0.228439	65.1627	42.2011	0.626703	0.517526	0.999695	Ighv1-55	12	115208095	115208591	-	415	IG_V_gene	immunoglobulin heavy variable 1-55 [Source:MGI Symbol;Acc:MGI:4439716]	-
ENSMUSG00000078249	99.1556	69.8411	0.504352	0.0393219	0.686942	71.6674	102.008	-0.509813	0.0157479	0.267166	69.1168	100.62	-0.538905	0.0178915	0.272625	100.184	101.521	-0.0202815	0.908801	0.999695	Hmga1b	11	120762794	120764419	+	1626	protein_coding	high mobility group AT-hook 1B [Source:MGI Symbol;Acc:MGI:96161]	HMGI/HMGY
ENSMUSG00000055430	2336.73	2728.81	-0.223979	0.0395194	0.686942	2576.33	2403.85	0.100067	0.124382	0.640593	2614.17	2371.49	0.140573	0.0254393	0.326776	2513.79	2392.23	0.0716502	0.199046	0.999695	Nap1l5	6	58905233	58907076	-	1844	protein_coding	nucleosome assembly protein 1-like 5 [Source:MGI Symbol;Acc:MGI:1923555]	-
ENSMUSG00000102101	32.1148	20.1412	0.667751	0.0393904	0.686942	27.8212	33.0343	-0.245386	0.338117	0.832952	19.6334	32.5904	-0.729775	0.0339915	0.383252	30.9904	32.879	-0.0825108	0.754091	0.999695	Zbtb11os1	16	55973268	55974617	-	1350	antisense	zinc finger and BTB domain containing 11, opposite strand 1 [Source:MGI Symbol;Acc:MGI:1913641]	-
ENSMUSG00000025956	236.262	192.93	0.292153	0.0395032	0.686942	234.83	243.06	-0.0497126	0.650805	0.941551	207.484	239.771	-0.209586	0.0758361	0.547614	227.055	241.883	-0.0910858	0.375323	0.999695	Mettl21a	1	64606473	64617242	-	3005	protein_coding	methyltransferase like 21A [Source:MGI Symbol;Acc:MGI:1914349]	-
ENSMUSG00000031078	1446.07	1144.62	0.337087	0.039534	0.686942	1342.24	1487.73	-0.148413	0.0443024	0.441126	1340.07	1467.6	-0.130789	0.0891715	0.58182	1517.23	1480.44	0.0355305	0.632711	0.999695	Cttn	7	144435733	144471009	-	4192	protein_coding	cortactin [Source:MGI Symbol;Acc:MGI:99695]	-
ENSMUSG00000026646	424.347	510.063	-0.265246	0.0393047	0.686942	436.769	436.458	0.0014423	0.986871	0.998603	489.052	430.671	0.182188	0.135381	0.662438	454.921	434.374	0.0673235	0.481527	0.999695	Suv39h2	2	3455815	3475031	-	4410	protein_coding	suppressor of variegation 3-9 2 [Source:MGI Symbol;Acc:MGI:1890396]	-
ENSMUSG00000034107	36.3588	22.781	0.673999	0.0392623	0.686942	24.8625	37.3625	-0.590609	0.0455306	0.447136	27.0189	36.8957	-0.447502	0.150647	0.678637	33.4709	37.2081	-0.152802	0.61181	0.999695	Ano7	1	93373930	93404303	+	3984	protein_coding	anoctamin 7 [Source:MGI Symbol;Acc:MGI:3052714]	-
ENSMUSG00000084846	157.442	122.569	0.358269	0.0390912	0.686942	169.929	161.946	0.0699515	0.608528	0.935056	137.856	159.791	-0.209308	0.150643	0.678637	166.436	161.168	0.0456274	0.751234	0.999695	A730011C13Rik	3	94994410	94997350	-	2234	antisense	RIKEN cDNA A730011C13 gene [Source:MGI Symbol;Acc:MGI:2442973]	-
ENSMUSG00000044177	134.617	81.8058	0.718391	0.0393016	0.686942	91.8585	138.351	-0.590765	0.0354888	0.401004	101.474	136.58	-0.430296	0.193236	0.726732	141.168	137.78	0.0342702	0.906473	0.999695	Wfikkn2	11	94235956	94246005	-	3827	protein_coding	WAP, follistatin/kazal, immunoglobulin, kunitz and netrin domain containing 2 [Source:MGI Symbol;Acc:MGI:2669209]	-
ENSMUSG00000031274	441.416	335.601	0.395103	0.0392075	0.686942	399.499	453.935	-0.184655	0.174697	0.705687	409.048	447.955	-0.131229	0.286622	0.802054	436.199	451.859	-0.0513849	0.608991	0.999695	Col4a5	X	141475385	141689234	+	6718	protein_coding	collagen, type IV, alpha 5 [Source:MGI Symbol;Acc:MGI:88456]	-
ENSMUSG00000019823	90.0521	68.5824	0.392674	0.0394066	0.686942	91.1096	92.6436	-0.0223089	0.893948	0.980959	85.0236	91.3873	-0.103977	0.561427	0.912814	104.814	92.1976	0.184494	0.212468	0.999695	Mical1	10	41476314	41487032	+	6047	protein_coding	microtubule associated monooxygenase, calponin and LIM domain containing 1 [Source:MGI Symbol;Acc:MGI:2385847]	-
ENSMUSG00000051285	1248.91	1555.1	-0.316135	0.0395224	0.686942	1308.79	1284.57	0.0269785	0.740281	0.957696	1304.7	1267.51	0.0412705	0.603345	0.926494	1296.56	1278.48	0.0202173	0.729878	0.999695	Pcmtd1	1	7088920	7173628	+	6654	protein_coding	protein-L-isoaspartate (D-aspartate) O-methyltransferase domain containing 1 [Source:MGI Symbol;Acc:MGI:2441773]	-
ENSMUSG00000061724	22.5883	35.0482	-0.632094	0.0394119	0.686942	30.6299	23.2272	0.39606	0.118371	0.634603	25.603	22.9213	0.158021	0.614053	0.928541	29.0473	23.1242	0.327697	0.200573	0.999695	Gm2423	13	13232161	13232893	-	733	processed_pseudogene	predicted gene 2423 [Source:MGI Symbol;Acc:MGI:3805957]	-
ENSMUSG00000053916	2.71875	8.19391	-1.59058	0.0396429	0.687645	6.55169	2.79498	1.21888	0.0832154	0.564672	8.58325	2.75913	1.63849	0.0200605	0.288036	8.49536	2.7829	1.60605	0.015598	1	Nanp	2	151029685	151039398	-	1488	protein_coding	N-acetylneuraminic acid phosphatase [Source:MGI Symbol;Acc:MGI:1914561]	-
ENSMUSG00000097877	12.3251	5.71973	1.10189	0.0396308	0.687645	7.80564	12.6643	-0.69443	0.145371	0.67202	12.9977	12.5078	0.0538625	0.915745	0.987296	16.1621	12.6118	0.359807	0.444618	0.999695	Gm26703	5	104109217	104119687	+	5491	antisense	predicted gene, 26703 [Source:MGI Symbol;Acc:MGI:5477197]	-
ENSMUSG00000020284	1040.38	822.212	0.339338	0.0399024	0.690955	1026.96	1070.7	-0.0602565	0.611822	0.935561	876.814	1055.89	-0.267808	0.0424208	0.423914	1002.5	1065.25	-0.0876938	0.422356	0.999695	1810043G02Rik	10	77978524	77986905	+	6627	protein_coding	RIKEN cDNA 1810043G02 gene [Source:MGI Symbol;Acc:MGI:1915134]	-
ENSMUSG00000023755	309.334	236.772	0.384977	0.039877	0.690955	293.414	318.302	-0.117443	0.445473	0.880071	244.276	313.938	-0.360444	0.0829108	0.562384	301.431	316.715	-0.0715431	0.549596	0.999695	Rhebl1	15	98877778	98894540	-	3035	protein_coding	Ras homolog enriched in brain like 1 [Source:MGI Symbol;Acc:MGI:1916409]	-
ENSMUSG00000058881	3025.68	2597.62	0.220236	0.0399601	0.691014	2705.71	3112.12	-0.201955	0.0832082	0.564672	2741.34	3070.62	-0.163569	0.0171275	0.264747	2941.77	3097.39	-0.0744287	0.273031	0.999695	Zfp516	18	82910879	83005314	+	7817	protein_coding	zinc finger protein 516 [Source:MGI Symbol;Acc:MGI:2443957]	zf-C2H2
ENSMUSG00000057948	106.295	79.7408	0.411318	0.040009	0.691014	119.891	109.373	0.134417	0.512199	0.907597	88.4772	107.889	-0.283051	0.127979	0.652965	111.018	108.82	0.0317316	0.83418	0.999695	Unc13d	11	116062095	116077961	-	4679	protein_coding	unc-13 homolog D [Source:MGI Symbol;Acc:MGI:1917700]	-
ENSMUSG00000096718	41.9418	63.2077	-0.592422	0.039996	0.691014	41.5792	43.13	-0.0534374	0.821294	0.971116	53.2633	42.5677	0.329506	0.161993	0.69256	56.0052	42.9289	0.383814	0.0651179	0.999695	Zfp781	10	81901911	81930480	-	4067	protein_coding	zinc finger protein 781 [Source:MGI Symbol;Acc:MGI:3696710]	-
ENSMUSG00000036502	175.632	213.756	-0.282828	0.0402605	0.691567	230.166	180.671	0.349574	0.00435837	0.125628	228.403	178.245	0.357165	0.0022696	0.0701644	188.176	179.802	0.0659219	0.577525	0.999695	Tmem255a	X	38196573	38252439	-	4490	protein_coding	transmembrane protein 255A [Source:MGI Symbol;Acc:MGI:3045722]	-
ENSMUSG00000036225	425.325	485.405	-0.190269	0.0402548	0.691567	458.994	437.5	0.0701702	0.419178	0.868637	496.771	431.658	0.202511	0.0217862	0.299944	449.651	435.402	0.0460914	0.59691	0.999695	Kctd1	18	14968685	15151446	-	3587	protein_coding	potassium channel tetramerisation domain containing 1 [Source:MGI Symbol;Acc:MGI:1918269]	-
ENSMUSG00000048696	519.417	403.165	0.365201	0.0402894	0.691567	442.126	534.423	-0.273879	0.0099867	0.20695	451.645	527.134	-0.222506	0.0677823	0.523331	497.177	531.806	-0.0972484	0.345174	0.999695	Mex3d	10	80380355	80387659	-	3266	protein_coding	mex3 RNA binding family member D [Source:MGI Symbol;Acc:MGI:2681847]	-
ENSMUSG00000040254	30.7686	47.9114	-0.638102	0.0402204	0.691567	36.5634	31.6288	0.20969	0.442416	0.877981	44.7485	31.2246	0.518663	0.0701353	0.532366	32.7138	31.492	0.0532399	0.866438	0.999695	Sema3d	5	12383385	12588948	+	8595	protein_coding	sema domain, immunoglobulin domain (Ig), short basic domain, secreted, (semaphorin) 3D [Source:MGI Symbol;Acc:MGI:1860118]	-
ENSMUSG00000049281	254.44	309.367	-0.283212	0.0403162	0.691567	327.148	261.786	0.321883	0.0098495	0.205973	297.705	258.248	0.204264	0.104103	0.610093	250.976	260.472	-0.0521038	0.658732	0.999695	Scn3b	9	40269217	40291618	+	5461	protein_coding	sodium channel, voltage-gated, type III, beta [Source:MGI Symbol;Acc:MGI:1918882]	-
ENSMUSG00000084939	12.7161	5.89756	1.12397	0.0401348	0.691567	25.4434	13.0807	0.961531	0.01692	0.274233	7.9534	12.9057	-0.684294	0.273943	0.796224	18.17	13.0182	0.483455	0.160194	0.999695	Gm830	4	95464724	95487394	-	3502	processed_transcript	predicted gene 830 [Source:MGI Symbol;Acc:MGI:2685676]	-
ENSMUSG00000107043	11.5405	5.55079	1.06104	0.0402354	0.691567	9.04825	11.8693	-0.392307	0.407064	0.863476	8.79899	11.7139	-0.400477	0.403426	0.854422	8.3424	11.8118	-0.503432	0.250426	0.999695	Gm42849	5	33947026	33948832	+	1584	lincRNA	predicted gene 42849 [Source:MGI Symbol;Acc:MGI:5662986]	-
ENSMUSG00000018398	2541.3	2294.45	0.147651	0.0402242	0.691567	2577.01	2613.93	-0.0206477	0.780705	0.963468	2581.02	2579.09	0.00134907	0.982616	0.997194	2512.12	2601.52	-0.0503831	0.33322	0.999695	2022-09-08	11	53519257	53549565	+	6087	protein_coding	septin 8 [Source:MGI Symbol;Acc:MGI:894310]	-
ENSMUSG00000037010	11.1682	21.7525	-0.96013	0.0403535	0.691617	12.7459	11.5015	0.150395	0.759249	0.961034	7.86376	11.3373	-0.538507	0.300134	0.810519	18.6332	11.4352	0.702552	0.178673	0.999695	Apln	X	48025146	48034853	-	3149	protein_coding	apelin [Source:MGI Symbol;Acc:MGI:1353624]	-
ENSMUSG00000078307	575.606	690.5	-0.262432	0.0404084	0.691967	676.703	592.097	0.192607	0.0375784	0.409152	728.455	584.179	0.317226	0.00122839	0.0440926	608.94	589.256	0.0475499	0.528611	0.999695	AI593442	9	52673042	52679780	-	5823	protein_coding	expressed sequence AI593442 [Source:MGI Symbol;Acc:MGI:2143099]	-
ENSMUSG00000025358	70.5247	53.5401	0.399774	0.0404487	0.692069	70.0583	72.5443	-0.0518729	0.763765	0.962018	66.119	71.5752	-0.113911	0.514802	0.897432	77.4337	72.197	0.0991817	0.536688	0.999695	Cdk2	10	128697939	128705031	-	6219	protein_coding	cyclin-dependent kinase 2 [Source:MGI Symbol;Acc:MGI:104772]	-
ENSMUSG00000082286	177.895	144.948	0.295051	0.0405457	0.693139	180.3	182.942	-0.0203375	0.881826	0.979705	167.105	180.531	-0.109954	0.446784	0.874204	200.659	182.105	0.139954	0.211901	0.999695	Pisd-ps1	11	3125904	3131004	+	1757	transcribed_unprocessed_pseudogene	phosphatidylserine decarboxylase, pseudogene 1 [Source:MGI Symbol;Acc:MGI:3842428]	-
ENSMUSG00000041073	904.696	702.814	0.363982	0.0407165	0.694944	888.235	930.671	-0.0671537	0.555868	0.918601	891.722	918.141	-0.0413503	0.640312	0.934323	895.806	926.187	-0.047943	0.547238	0.999695	Nacad	11	6597823	6606053	-	4892	protein_coding	NAC alpha domain containing [Source:MGI Symbol;Acc:MGI:3603030]	-
ENSMUSG00000041477	497.975	435.594	0.193332	0.0407205	0.694944	496.128	512.167	-0.0459466	0.548685	0.917373	517.822	505.377	0.035321	0.667828	0.942151	492.498	509.762	-0.0499156	0.481152	0.999695	Dcp1b	6	119175253	119221616	+	6339	protein_coding	decapping mRNA 1B [Source:MGI Symbol;Acc:MGI:2442404]	-
ENSMUSG00000105987	80.7951	62.6714	0.366282	0.0409825	0.697957	105.692	83.101	0.347114	0.0465995	0.451432	20.8297	81.9972	-1.97453	4.95093e-11	1.2662e-08	93.178	82.7066	0.173201	0.244259	0.999695	AI506816	5	23698296	23712667	-	4479	processed_transcript	expressed sequence AI506816 [Source:MGI Symbol;Acc:MGI:2140929]	-
ENSMUSG00000022512	39.0605	21.003	0.899353	0.0409787	0.697957	40.0805	40.1143	-0.00159442	0.99734	0.999589	18.5091	39.6287	-1.10895	0.0254484	0.326776	48.5415	39.9682	0.278744	0.423346	0.999695	Cldn1	16	26356642	26371841	-	4841	protein_coding	claudin 1 [Source:MGI Symbol;Acc:MGI:1276109]	-
ENSMUSG00000080316	350.191	283.151	0.305588	0.0410011	0.697957	325.237	360.116	-0.147224	0.122484	0.638976	346.47	355.387	-0.0349879	0.778178	0.963598	328.849	358.461	-0.124355	0.243523	0.999695	Spaca6	17	17827158	17843009	+	7067	protein_coding	sperm acrosome associated 6 [Source:MGI Symbol;Acc:MGI:1922452]	-
ENSMUSG00000023336	72.7716	50.3366	0.53362	0.0410424	0.698069	111.11	74.851	0.569421	0.0844069	0.567769	44.3153	73.8463	-0.738916	0.00725737	0.155409	76.2397	74.5052	0.0305897	0.883901	0.999695	Wfdc1	8	119666365	119688222	+	1539	protein_coding	WAP four-disulfide core domain 1 [Source:MGI Symbol;Acc:MGI:1915116]	-
ENSMUSG00000028525	869.011	1085.83	-0.321187	0.0410822	0.698154	971.37	893.684	0.120204	0.266707	0.790072	1051.06	881.922	0.252906	0.0079483	0.164567	940.101	889.544	0.0800963	0.291057	0.999695	Pde4b	4	102087543	102607259	+	10560	protein_coding	phosphodiesterase 4B, cAMP specific [Source:MGI Symbol;Acc:MGI:99557]	-
ENSMUSG00000114025	8.95921	17.4141	-0.953912	0.041219	0.699888	13.9049	9.21348	0.592658	0.146495	0.672409	31.2943	9.09351	1.7765	2.37399e-05	0.00173471	11.0186	9.17002	0.266249	0.56522	0.999695	Gm49331	12	17902389	17904675	+	1214	unprocessed_pseudogene	predicted gene, 49331 [Source:MGI Symbol;Acc:MGI:6121516]	-
ENSMUSG00000005873	1839.79	2133.47	-0.213491	0.0413004	0.700677	2021.33	1892.7	0.0947926	0.181562	0.715082	1927.57	1867.2	0.0458025	0.559834	0.912619	1853.52	1883.48	-0.0230766	0.713313	0.999695	Reep5	18	34344889	34373415	-	2894	protein_coding	receptor accessory protein 5 [Source:MGI Symbol;Acc:MGI:1270152]	-
ENSMUSG00000029674	352.122	448.774	-0.350239	0.0414408	0.701284	358.44	362.071	-0.0146393	0.894844	0.980959	423.575	357.347	0.246082	0.0367508	0.398226	366.435	360.42	0.0240304	0.824756	0.999695	Limk1	5	134656039	134688598	-	7162	protein_coding	LIM-domain containing, protein kinase [Source:MGI Symbol;Acc:MGI:104572]	-
ENSMUSG00000031431	396.57	489.92	-0.305365	0.0413863	0.701284	395.698	408.046	-0.0446687	0.686644	0.949614	366.333	402.463	-0.135877	0.232454	0.763989	451.895	406.035	0.154069	0.106718	0.999695	Tsc22d3	X	140539528	140600659	-	4341	protein_coding	TSC22 domain family, member 3 [Source:MGI Symbol;Acc:MGI:1196284]	TSC22
ENSMUSG00000042807	163.417	211.66	-0.373007	0.0414254	0.701284	153.242	168.018	-0.132964	0.506272	0.905164	182.969	165.843	0.139903	0.451252	0.874451	158.331	167.268	-0.0797569	0.611556	0.999695	Hecw2	1	53806876	54195168	-	12947	protein_coding	HECT, C2 and WW domain containing E3 ubiquitin protein ligase 2 [Source:MGI Symbol;Acc:MGI:2685817]	-
ENSMUSG00000109379	13.2084	25.136	-0.928501	0.0415349	0.702286	11.0044	13.5808	-0.300629	0.530195	0.913449	20.4185	13.4055	0.60259	0.20229	0.736094	12.1305	13.5186	-0.15391	0.69548	0.999695	Gm44550	7	118785143	118787200	+	2058	TEC	predicted gene 44550 [Source:MGI Symbol;Acc:MGI:5753126]	-
ENSMUSG00000022656	872.46	704.976	0.308043	0.0416311	0.703322	864.729	897.125	-0.0532637	0.704064	0.952853	773.659	885.379	-0.195466	0.0978694	0.599524	852.309	893.074	-0.067546	0.477165	0.999695	Nectin3	16	46387706	46498525	-	12747	protein_coding	nectin cell adhesion molecule 3 [Source:MGI Symbol;Acc:MGI:1930171]	-
ENSMUSG00000032890	1388.76	1623.86	-0.225931	0.0417246	0.704012	1263.93	1428.38	-0.176269	0.0508138	0.466285	1442.94	1409.48	0.0341862	0.734302	0.953893	1500.59	1421.56	0.0784265	0.435302	0.999695	Rims3	4	120854816	120896579	+	7972	protein_coding	regulating synaptic membrane exocytosis 3 [Source:MGI Symbol;Acc:MGI:2443331]	-
ENSMUSG00000004328	120.37	151.88	-0.337033	0.041742	0.704012	115.173	123.789	-0.104289	0.705894	0.953683	122.794	122.154	0.00677619	0.965836	0.993731	139.467	123.219	0.178665	0.379448	0.999695	Hif3a	7	17031507	17062427	-	6710	protein_coding	hypoxia inducible factor 3, alpha subunit [Source:MGI Symbol;Acc:MGI:1859778]	-
ENSMUSG00000040945	1027.82	818.678	0.327917	0.0418785	0.705527	901.076	1057.57	-0.230876	0.0310595	0.374766	838.494	1043.13	-0.315053	0.000729139	0.0294086	977.473	1052.3	-0.106413	0.226192	0.999695	Rcc2	4	140700541	140723220	+	4155	protein_coding	regulator of chromosome condensation 2 [Source:MGI Symbol;Acc:MGI:1919784]	-
ENSMUSG00000028937	1004.92	1263.15	-0.329943	0.041915	0.705527	1111.42	1034.19	0.103899	0.495281	0.900978	1069.98	1019.86	0.0691643	0.627451	0.931688	1079.72	1028.97	0.069332	0.568335	0.999695	Acot7	4	152178134	152271855	+	2124	protein_coding	acyl-CoA thioesterase 7 [Source:MGI Symbol;Acc:MGI:1917275]	-
ENSMUSG00000031246	670.49	784.137	-0.225563	0.0419371	0.705527	756.435	689.737	0.13303	0.0969047	0.595293	694.423	680.472	0.0278129	0.774316	0.96301	739.729	686.394	0.107859	0.112214	0.999695	Sh3bgrl	X	109095365	109197873	+	3298	protein_coding	SH3-binding domain glutamic acid-rich protein like [Source:MGI Symbol;Acc:MGI:1930849]	-
ENSMUSG00000027002	2668.56	3180.42	-0.253086	0.0419956	0.70592	2770.9	2744.82	0.0135559	0.855297	0.977086	2906.28	2708.28	0.101472	0.141905	0.670459	2672.32	2731.75	-0.0316193	0.520955	0.999695	Nckap1	2	80500512	80581380	-	4964	protein_coding	NCK-associated protein 1 [Source:MGI Symbol;Acc:MGI:1355333]	-
ENSMUSG00000060988	855.917	1119.89	-0.387655	0.0421536	0.707392	928.351	880.297	0.0766121	0.618564	0.937727	986.936	868.695	0.183914	0.102005	0.608246	832.643	876.111	-0.0730612	0.430946	0.999695	Galnt13	2	54436317	55118309	+	7810	protein_coding	polypeptide N-acetylgalactosaminyltransferase 13 [Source:MGI Symbol;Acc:MGI:2139447]	-
ENSMUSG00000028860	49.6806	31.9197	0.6372	0.0421365	0.707392	51.1622	51.1322	0.001863	0.994113	0.99944	39.0206	50.4177	-0.370439	0.174297	0.706793	40.6404	50.8725	-0.326031	0.150801	0.999695	Sytl1	4	133253090	133263113	-	2518	protein_coding	synaptotagmin-like 1 [Source:MGI Symbol;Acc:MGI:1933365]	-
ENSMUSG00000031661	358.966	256.03	0.486668	0.0423759	0.708044	413.68	369.232	0.164124	0.519895	0.908756	484.305	364.281	0.411842	0.00436121	0.111792	366.998	367.49	-0.00184039	0.993236	0.999695	Nkd1	8	88521354	88594884	+	4558	protein_coding	naked cuticle 1 [Source:MGI Symbol;Acc:MGI:2135954]	-
ENSMUSG00000052889	1206.45	1361.13	-0.174122	0.0422682	0.708044	1359.02	1240.84	0.131113	0.0590044	0.493359	1381.19	1224.41	0.173965	0.0166394	0.260063	1244.03	1234.98	0.0107076	0.879683	0.999695	Prkcb	7	122288751	122634402	+	7651	protein_coding	protein kinase C, beta [Source:MGI Symbol;Acc:MGI:97596]	-
ENSMUSG00000060450	3007.12	3550.72	-0.239632	0.0423701	0.708044	3229.87	3093.68	0.0620624	0.298405	0.813211	3208.37	3051.91	0.0718268	0.228742	0.760927	3134.35	3078.57	0.0259062	0.566262	0.999695	Rnf14	18	38296635	38317847	+	3515	protein_coding	ring finger protein 14 [Source:MGI Symbol;Acc:MGI:1929668]	-
ENSMUSG00000022887	10.3971	4.12079	1.3519	0.0422659	0.708044	6.68312	10.687	-0.676709	0.199682	0.731095	6.77989	10.5512	-0.642454	0.23201	0.763283	10.5408	10.6413	-0.0141473	0.973535	0.999695	Masp1	16	23449417	23520815	-	9833	protein_coding	mannan-binding lectin serine peptidase 1 [Source:MGI Symbol;Acc:MGI:88492]	-
ENSMUSG00000032246	12.84	5.39319	1.26724	0.0424037	0.708044	8.78012	13.189	-0.586255	0.302629	0.815614	13.2924	13.0272	0.0316344	0.949019	0.992355	11.2272	13.1388	-0.226447	0.607286	0.999695	Calml4	9	62858080	62875921	+	3642	protein_coding	calmodulin-like 4 [Source:MGI Symbol;Acc:MGI:1922850]	-
ENSMUSG00000066363	9.31411	18.208	-0.959595	0.0423898	0.708044	58.1418	9.57855	2.59816	5.17844e-06	0.00137848	38.9578	9.45203	2.04365	NA	1	22.5723	9.53475	1.23827	0.0404997	0.999695	Serpina3f	12	104214544	104221129	+	2290	protein_coding	serine (or cysteine) peptidase inhibitor, clade A, member 3F [Source:MGI Symbol;Acc:MGI:2182838]	-
ENSMUSG00000069622	3.13515	7.54675	-1.26753	0.0425096	0.709222	3.2955	3.22696	0.0413597	0.95487	1	2.19311	3.18251	-0.519792	0.555542	0.911083	6.16033	3.20958	0.940874	0.140628	1	Gm10273	10	59395632	59396757	+	1126	protein_coding	predicted pseudogene 10273 [Source:MGI Symbol;Acc:MGI:3704362]	-
ENSMUSG00000014791	202.856	160.303	0.338899	0.0425689	0.709624	214.158	208.665	0.037163	0.780875	0.963468	213.358	205.861	0.0524343	0.703426	0.948513	198.441	207.676	-0.0656107	0.600228	0.999695	Elmo3	8	105305601	105310760	+	3485	protein_coding	engulfment and cell motility 3 [Source:MGI Symbol;Acc:MGI:2679007]	-
ENSMUSG00000084493	48.9984	32.1127	0.611463	0.042978	0.714664	32.4026	50.3968	-0.63463	0.0119437	0.232162	31.2214	49.7302	-0.675182	0.020903	0.29424	43.338	50.1563	-0.208301	0.445935	0.999695	Gm22106	15	73729164	73729290	+	127	snRNA	predicted gene, 22106 [Source:MGI Symbol;Acc:MGI:5451883]	-
ENSMUSG00000021721	8.54803	15.766	-0.879353	0.0429092	0.714664	15.2112	8.78983	0.783047	0.0522023	0.470878	16.8293	8.67366	0.946624	0.0249068	0.322713	12.3651	8.7508	0.499517	0.273358	0.999695	Htr1a	13	105443639	105448122	+	4484	protein_coding	5-hydroxytryptamine (serotonin) receptor 1A [Source:MGI Symbol;Acc:MGI:96273]	-
ENSMUSG00000025817	397.531	474.34	-0.254472	0.0429757	0.714664	407.465	408.875	-0.00506044	0.956778	0.99181	451.209	403.455	0.160746	0.134276	0.660697	427.103	406.93	0.0698865	0.411854	0.999695	Nudt5	2	5845019	5871895	+	6484	protein_coding	nudix (nucleoside diphosphate linked moiety X)-type motif 5 [Source:MGI Symbol;Acc:MGI:1858232]	-
ENSMUSG00000031785	192.487	152.417	0.3346	0.0430417	0.715133	216.055	197.973	0.126897	0.405597	0.862673	212.716	195.353	0.125561	0.377398	0.847	204.227	197.032	0.0525525	0.620824	0.999695	Adgrg1	8	94974751	95014217	+	5421	protein_coding	adhesion G protein-coupled receptor G1 [Source:MGI Symbol;Acc:MGI:1340051]	-
ENSMUSG00000032501	862.877	742.84	0.216228	0.043112	0.715305	891.211	887.593	0.00554183	0.950783	0.99126	732.702	875.654	-0.25649	0.0159664	0.253592	822.332	883.398	-0.103539	0.305149	0.999695	Trib1	15	59648350	59657099	+	6248	protein_coding	tribbles pseudokinase 1 [Source:MGI Symbol;Acc:MGI:2443397]	-
ENSMUSG00000036882	858.708	616.689	0.47743	0.043157	0.715305	696.491	883.076	-0.342766	0.000180434	0.0172037	806.032	871.429	-0.111838	0.306201	0.813629	769.497	879.022	-0.192008	0.0419268	0.999695	Arhgap33	7	30522226	30535060	-	5336	protein_coding	Rho GTPase activating protein 33 [Source:MGI Symbol;Acc:MGI:2673998]	-
ENSMUSG00000005917	21.4726	9.15847	1.23683	0.0431622	0.715305	30.4514	22.049	0.464249	0.364639	0.848035	16.2575	21.784	-0.431554	0.499304	0.892561	29.5695	21.9737	0.426101	0.302073	0.999695	Otx1	11	21994764	22002897	-	5422	protein_coding	orthodenticle homeobox 1 [Source:MGI Symbol;Acc:MGI:97450]	TF_Otx
ENSMUSG00000025283	690.442	587.937	0.232199	0.0431944	0.715305	779.603	710.424	0.13402	0.280867	0.800929	675.726	700.729	-0.0516939	0.730138	0.953423	793.701	706.89	0.167047	0.087523	0.999695	Sat1	X	155213132	155216449	-	2774	protein_coding	spermidine/spermine N1-acetyl transferase 1 [Source:MGI Symbol;Acc:MGI:98233]	-
ENSMUSG00000033107	6.22336	13.004	-1.06067	0.043263	0.715851	6.35568	6.40145	-0.0180956	0.97765	0.996672	5.63581	6.31379	-0.159242	0.830857	0.970611	4.58648	6.37362	-0.48181	0.433315	1	Rnf125	18	20944625	20983848	+	1334	protein_coding	ring finger protein 125 [Source:MGI Symbol;Acc:MGI:1914914]	-
ENSMUSG00000010311	189.668	46.3742	2.03259	0.0433409	0.71655	252.282	194.862	0.372538	0.597232	0.93106	87.303	192.468	-1.14083	0.183127	0.716276	195.381	194.094	0.00951316	0.982021	0.999695	Optc	1	133897199	133907999	-	2575	protein_coding	opticin [Source:MGI Symbol;Acc:MGI:2151113]	-
ENSMUSG00000032014	146.616	105.144	0.478607	0.0434057	0.717031	160.779	150.922	0.0914506	0.62676	0.938603	118.058	148.8	-0.333847	0.107768	0.617305	147.185	150.14	-0.028985	0.870684	0.999695	Oaf	9	43221235	43239911	-	2629	protein_coding	out at first homolog [Source:MGI Symbol;Acc:MGI:94852]	-
ENSMUSG00000029491	32399	35845.7	-0.14586	0.043501	0.718016	31609.2	33326.6	-0.076321	0.292115	0.809422	34003.2	32881.3	0.0483783	0.419587	0.862752	33719.1	33166.7	0.0238258	0.586155	0.999695	Pde6b	5	108388391	108432397	+	5026	protein_coding	phosphodiesterase 6B, cGMP, rod receptor, beta polypeptide [Source:MGI Symbol;Acc:MGI:97525]	-
ENSMUSG00000032496	7.32957	0.974232	2.89671	0.043556	0.718335	1.003	7.58159	-2.9323	NA	1	7.44798	7.44269	-0.00654221	0.995058	0.999035	3.02717	7.51757	-1.3186	0.272468	1	Ltf	9	111019271	111042767	+	3450	protein_coding	lactotransferrin [Source:MGI Symbol;Acc:MGI:96837]	-
ENSMUSG00000058672	1253.65	1531.66	-0.28909	0.0436089	0.718617	1494.54	1289.9	0.212266	0.0368729	0.406432	1322.68	1272.3	0.0563821	0.67371	0.943446	1355.46	1283.51	0.0787513	0.420148	0.999695	Tubb2a	13	34074274	34078007	-	1610	protein_coding	tubulin, beta 2A class IIA [Source:MGI Symbol;Acc:MGI:107861]	-
ENSMUSG00000068706	200.163	259.037	-0.371285	0.0436844	0.719272	301.489	205.942	0.550186	0.00169229	0.0725592	275.007	203.159	0.438641	0.00849243	0.172504	239.654	204.916	0.226361	0.198074	0.999695	Gm10250	15	5120654	5121135	-	482	processed_pseudogene	predicted pseudogene 10250 [Source:MGI Symbol;Acc:MGI:3642408]	-
ENSMUSG00000001986	627.213	719.513	-0.19776	0.0438033	0.719694	635.676	645.134	-0.0215313	0.798031	0.967931	738.461	636.543	0.213017	0.0302767	0.359582	596.583	642.073	-0.105648	0.130237	0.999695	Gria3	X	41400854	41678601	+	9859	protein_coding	glutamate receptor, ionotropic, AMPA3 (alpha 3) [Source:MGI Symbol;Acc:MGI:95810]	-
ENSMUSG00000051323	307.845	374.528	-0.283211	0.0437471	0.719694	329.494	316.653	0.0573846	0.687728	0.94974	376.936	312.437	0.269431	0.0778134	0.551233	317.658	315.127	0.0126785	0.90231	0.999695	Pcdh19	X	133582860	133688987	-	10464	protein_coding	protocadherin 19 [Source:MGI Symbol;Acc:MGI:2685563]	-
ENSMUSG00000074646	43.1031	29.8812	0.528688	0.0438174	0.719694	38.0598	44.3305	-0.218356	0.339645	0.834581	34.9914	43.7457	-0.323435	0.219242	0.75434	34.4422	44.119	-0.355693	0.120572	0.999695	6430550D23Rik	2	155973279	156007977	-	4994	protein_coding	RIKEN cDNA 6430550D23 gene [Source:MGI Symbol;Acc:MGI:2443361]	-
ENSMUSG00000092210	64.2625	47.0351	0.449781	0.0439001	0.720463	67.1124	66.0964	0.0206516	0.919161	0.985949	74.0735	65.214	0.181208	0.41168	0.858049	62.3094	65.7902	-0.0780957	0.663497	0.999695	A930009A15Rik	10	115569986	115582448	+	1001	protein_coding	RIKEN cDNA A930009A15 gene [Source:MGI Symbol;Acc:MGI:1925048]	-
ENSMUSG00000038506	806.248	899.888	-0.15871	0.0439615	0.720883	816.399	829.298	-0.0223736	0.769833	0.962683	853.256	818.245	0.0613927	0.379129	0.847624	839.642	825.343	0.0248025	0.658821	0.999695	Dcun1d2	8	13255963	13288131	-	4988	protein_coding	DCN1, defective in cullin neddylation 1, domain containing 2 (S. cerevisiae) [Source:MGI Symbol;Acc:MGI:2142792]	-
ENSMUSG00000035258	119.386	90.7101	0.397436	0.0440262	0.721355	128.096	122.774	0.0613118	0.823043	0.971314	118.322	121.168	-0.033997	0.865066	0.977766	136.793	122.2	0.163521	0.374929	0.999695	Abi3bp	16	56477878	56690135	+	7416	protein_coding	ABI gene family, member 3 (NESH) binding protein [Source:MGI Symbol;Acc:MGI:2444583]	-
ENSMUSG00000037921	125.243	193.582	-0.62747	0.044135	0.721374	227.129	128.825	0.817258	0.00118509	0.0575322	179.494	127.098	0.499762	0.0617617	0.50251	181.89	128.223	0.50356	0.000996793	0.299914	Ddx60	8	61928087	62038244	+	8684	protein_coding	DEAD (Asp-Glu-Ala-Asp) box polypeptide 60 [Source:MGI Symbol;Acc:MGI:2384570]	-
ENSMUSG00000050074	6.24815	2.04118	1.63002	0.0440899	0.721374	2.34752	6.41958	-1.44965	0.047008	0.453325	4.10838	6.33866	-0.646899	0.355101	0.838341	4.76662	6.39555	-0.426235	0.523649	1	Spink8	9	109812280	109826633	+	821	protein_coding	serine peptidase inhibitor, Kazal type 8 [Source:MGI Symbol;Acc:MGI:1925959]	-
ENSMUSG00000029401	114.087	88.2024	0.370179	0.044109	0.721374	127.026	117.371	0.115084	0.475623	0.892917	106.673	115.783	-0.118088	0.414476	0.858992	120.707	116.801	0.0467599	0.729758	0.999695	Rilpl2	5	124463265	124478366	-	3925	protein_coding	Rab interacting lysosomal protein-like 2 [Source:MGI Symbol;Acc:MGI:1933112]	-
ENSMUSG00000005034	2796.67	3261.23	-0.221623	0.0443322	0.724008	2945.71	2876.46	0.0342671	0.724351	0.955714	3089.51	2838.3	0.122063	0.121979	0.643131	2857.89	2862.83	-0.00232584	0.964326	0.999695	Prkacb	3	146729574	146812990	-	8772	protein_coding	protein kinase, cAMP dependent, catalytic, beta [Source:MGI Symbol;Acc:MGI:97594]	-
ENSMUSG00000030796	121.015	86.8187	0.478168	0.0444113	0.724225	124.989	124.508	0.00618499	0.976175	0.996442	92.9685	122.827	-0.4038	0.0450021	0.435771	122.636	123.883	-0.0146347	0.922095	0.999695	Tead2	7	45215753	45233644	+	4788	protein_coding	TEA domain family member 2 [Source:MGI Symbol;Acc:MGI:104904]	TEA
ENSMUSG00000042515	52.4825	72.2205	-0.459899	0.0444175	0.724225	59.7572	53.9652	0.147407	0.478555	0.893985	60.4692	53.2639	0.178601	0.446993	0.874204	63.291	53.7163	0.238629	0.186327	0.999695	Mum1l1	X	139210042	139238335	+	4859	protein_coding	melanoma associated antigen (mutated) 1-like 1 [Source:MGI Symbol;Acc:MGI:2445062]	-
ENSMUSG00000020590	942.076	1134.33	-0.267715	0.0446647	0.727075	964.844	968.903	-0.0061147	0.955632	0.99139	1045.73	956.087	0.128585	0.182885	0.715838	979.764	964.355	0.0230638	0.734314	0.999695	Snx13	12	35047186	35147479	+	7866	protein_coding	sorting nexin 13 [Source:MGI Symbol;Acc:MGI:2661416]	-
ENSMUSG00000032531	786.012	683.584	0.201091	0.0446485	0.727075	814.92	808.445	0.0114389	0.893506	0.980959	812.178	797.674	0.0269269	0.778633	0.963598	814.208	804.655	0.016886	0.809019	0.999695	Amotl2	9	102716672	102733418	+	6289	protein_coding	angiomotin-like 2 [Source:MGI Symbol;Acc:MGI:1929286]	-
ENSMUSG00000039691	48.7082	21.9246	1.15254	0.0447094	0.727214	24.9843	50.048	-1.00108	0.169624	0.699944	19.3597	49.4139	-1.36234	0.0190732	0.281483	29.6878	49.855	-0.74771	0.08289	0.999695	Tspan10	11	120442644	120446950	+	1802	protein_coding	tetraspanin 10 [Source:MGI Symbol;Acc:MGI:2384781]	-
ENSMUSG00000032328	3206.15	3871	-0.271791	0.0447797	0.727769	3439.41	3297.92	0.060545	0.455347	0.884892	3636.94	3253.94	0.160246	0.0551292	0.479627	3419.72	3282.06	0.0592809	0.254451	0.999695	Tmem30a	9	79768943	79793507	-	5646	protein_coding	transmembrane protein 30A [Source:MGI Symbol;Acc:MGI:106402]	-
ENSMUSG00000094092	14.5995	23.6694	-0.697245	0.0448603	0.728491	13.5441	15.0067	-0.150775	0.680854	0.9483	17.8255	14.8138	0.259072	0.485671	0.887294	14.2341	14.9441	-0.0715747	0.852538	0.999695	Gm15921	5	130208080	130208562	-	483	processed_pseudogene	predicted gene 15921 [Source:MGI Symbol;Acc:MGI:3801933]	-
ENSMUSG00000026113	941.803	1091.34	-0.21211	0.0449958	0.730101	989.032	968.747	0.0297266	0.707	0.953805	1048.18	955.787	0.132475	0.0567298	0.486398	945.226	964.155	-0.0287322	0.673033	0.999695	Inpp4a	1	37299865	37410736	+	10387	protein_coding	inositol polyphosphate-4-phosphatase, type I [Source:MGI Symbol;Acc:MGI:1931123]	-
ENSMUSG00000025001	78.9497	102.354	-0.373055	0.0450589	0.730535	87.7935	81.2227	0.11204	0.45091	0.882066	73.9122	80.1286	-0.11662	0.500156	0.893586	100.641	80.8219	0.315399	0.0681677	0.999695	Hells	19	38930915	38971051	+	7205	protein_coding	helicase, lymphoid specific [Source:MGI Symbol;Acc:MGI:106209]	-
ENSMUSG00000027360	506.071	639.188	-0.337172	0.0451061	0.730711	546.367	520.482	0.0698841	0.591958	0.928715	665.578	513.626	0.374531	0.0280205	0.345734	558.13	518.008	0.107246	0.384884	0.999695	Hdc	2	126593667	126619299	-	6389	protein_coding	histidine decarboxylase [Source:MGI Symbol;Acc:MGI:96062]	-
ENSMUSG00000112880	14.3009	7.44789	0.933414	0.0452648	0.732692	8.90243	14.7157	-0.728839	0.0932115	0.589856	12.7194	14.5134	-0.190477	0.644306	0.935853	9.09959	14.6431	-0.684078	0.0818493	0.999695	Gm20337	12	80942673	80945396	-	1118	bidirectional_promoter_lncRNA	predicted gene, 20337 [Source:MGI Symbol;Acc:MGI:5012522]	-
ENSMUSG00000024777	1610.57	1287.72	0.322538	0.0453093	0.732822	1642.39	1656.85	-0.0126801	0.884714	0.97994	1635.75	1634.47	0.00143157	0.987818	0.998196	1637.19	1648.87	-0.0102277	0.899076	0.999695	Ppp2r5b	19	6227765	6235872	-	2895	protein_coding	protein phosphatase 2, regulatory subunit B', beta [Source:MGI Symbol;Acc:MGI:2388480]	-
ENSMUSG00000026674	113.174	81.1691	0.481493	0.0453638	0.733114	134.384	116.332	0.207264	0.452006	0.882776	81.4719	114.84	-0.495763	0.0545417	0.477956	133.898	115.843	0.208042	0.329516	0.999695	Ddr2	1	169972307	170110762	-	9264	protein_coding	discoidin domain receptor family, member 2 [Source:MGI Symbol;Acc:MGI:1345277]	-
ENSMUSG00000095204	696.115	281.742	1.30506	0.0454953	0.734158	647.284	717.567	-0.148635	0.784619	0.964133	305.01	706.912	-1.21245	0.146933	0.677329	284.095	712.851	-1.32721	0.024619	0.999695	Ighv1-52	12	115145487	115145919	-	351	IG_V_gene	immunoglobulin heavy variable 1-52 [Source:MGI Symbol;Acc:MGI:4439752]	-
ENSMUSG00000103685	23.2997	13.1434	0.819501	0.0455014	0.734158	18.816	23.985	-0.347916	0.279202	0.800089	19.4948	23.6477	-0.28033	0.416094	0.860151	21.5994	23.8597	-0.142791	0.634332	0.999695	Gm37074	1	191249424	191251266	+	1843	TEC	predicted gene, 37074 [Source:MGI Symbol;Acc:MGI:5610302]	-
ENSMUSG00000021066	457.17	547.98	-0.260914	0.045674	0.734751	494.453	470.175	0.0726659	0.385646	0.857961	602.963	463.959	0.378067	2.28277e-06	0.000236756	463.457	467.984	-0.0138999	0.862338	0.999695	Atl1	12	69892614	69966417	+	9175	protein_coding	atlastin GTPase 1 [Source:MGI Symbol;Acc:MGI:1921241]	-
[truncated: 28,350 more rows]
