# Supplementary material for: Coordinated stimulation of axon regenerative and neurodegenerative transcriptional programs by ATF4 following optic nerve injury
Source: eLife. 2026 Feb 26;12:RP87528. doi: 10.7554/eLife.87528 (PMC12945389; doi:10.7554/eLife.87528)
Supplement: Supplementary file 2. [file elife-87528-supp2.xlsx]

## Sheet: Supplementary file 2 WT injured
© 2000-2022 QIAGEN. All rights reserved.
Supplementary file 2
Upstream Regulators: injured wildtype compared to uninjured wildtype (whole-retina RNA-seq)
Upstream Regulator	Expr Log Ratio	Molecule Type	Predicted Activation State	Activation z-score	p-value of overlap	Target Molecules in Dataset	Mechanistic Network
beta-estradiol		chemical - endogenous mammalian	Activated	4.231	1.66e-46	1110038B12Rik,A2M,ADAMTS1,ADGRG2,ADK,ADM2,ADORA1,AHR,AKAP12,ALCAM,ALX4,AMZ1,ANXA2,ANXA3,AR,ARHGEF2,ATF3,ATF5,ATP1B1,BACE2,BBC3,BCL2L11,BCL6,BMP4,BMPR1B,C4A/C4B,C9orf24,CACNB4,CALB1,CALML4,CAST,CCL4,CCND1,CCND2,CD274,CD68,CDK18,CDK2,CDKN1A,CDT1,CEBPB,CFTR,CHRNB4,CLDN1,CLDN2,CLEC4D,CLIC4,CLSTN2,COCH,COL1A2,COL3A1,COL4A5,COL4A6,COX6A2,CRABP2,CTSH,CTTN,CYP11A1,CYP4F8,CYP51A1,D430036J16Rik,DDAH1,DDIT3…	527 (20)
TGFB1		growth factor	Activated	5.198	2.98e-36	ACVRL1,ADGRG2,ADK,ADORA1,AHR,ANXA2,APLN,ARHGEF2,ATF3,ATP1B1,BBC3,BCL2L11,BCL3,BCL6,BMP4,BMP7,C1QC,CALB2,CALML4,CCL4,CCND1,CCND2,CCNO,CD274,CD300A,CD68,CD83,CDK2,CDKN1A,CDT1,CEBPB,CHRNB4,CHST11,CLDN1,CLIC4,CNIH1,COL18A1,COL1A2,COL3A1,COL4A1,COL4A2,COL4A6,COL5A3,COL6A3,CTSH,CTTN,CYP11A1,CYP51A1,DDIT3,DDR2,DHCR24,DLL3,DNMT3B,DSG2,DSP,DUSP1,EDNRB,EGR1,EGR2,EGR3,EHD1,EIF4EBP1,ELMO1,ELOVL6,EOMES,F5,FBL…	535 (21)
CREB1		transcription regulator	Activated	5.503	3.59e-30	ALKAL2,ALOXE3,ANGPTL2,ARHGAP33,ATF3,ATF5,BAG3,CALB2,CALN1,CAPN5,CCL4,CCND1,CD68,CD79A,CDA,CDH10,CDK14,CDKN1A,CEBPB,CH25H,Chil3/Chil4,COCH,COL24A1,CRH,CRHBP,CSRNP1,CYP11A1,CYP51A1,DUSP1,ECEL1,EDIL3,EGR1,EGR2,FOS,FOSB,GADD45A,GADD45B,GADD45G,GAL,GAP43,GNAL,GPNMB,HLA-A,HMGCR,HMGCS1,HMOX1,IDI1,IER2,INA,JUN,JUNB,KCNC4,KCND2,KIAA1549L,LITAF,LMO1,LPL,LYPD6,MARCKSL1,MIDN,MSMO1,MYC,MYO1B,NECTIN3,NFIL3,OMG…	374 (18)
forskolin		chemical toxicant	Activated	3.06	1.13e-29	ADAMTS1,ADCYAP1,ADGRG1,AKAP12,ALKAL2,ATF3,ATP1B1,BAG3,BCL2L11,BCL3,CCND1,CCND2,CD68,CD8A,CDK14,CDKN1A,CEBPB,CFTR,CHRNB4,COL18A1,COL1A2,CRH,CRHBP,CTTN,CYP11A1,DDIT3,DUSP1,ECEL1,EGR1,ELAVL4,ESR1,EZR,FBLN5,FLNC,FOS,FOSB,FOSL1,FOSL2,GADD45A,GADD45B,GADD45G,GAL,GALNT14,GAP43,GJA1,GNAL,GSTM5,HAPLN1,HMOX1,HTR1D,IER2,IGFBP3,INA,INHBB,ITGA3,JAK3,JUN,JUNB,KITLG,LITAF,LTF,MMP19,MMP9,MSMO1,Mt1,MYC,NFIL3,NKD1…	334 (22)
HTT		transcription regulator	Activated	2.978	2.06e-29	ACAT2,ACOT2,AKAP12,ARPP21,ATF3,ATP2B3,BBC3,BCL2L11,BCL3,BCL6,CALML4,CAST,CCND1,CDK2,CDKN1A,CEBPB,CLDN1,COCH,COL18A1,COL4A1,COL4A2,COL6A3,COX6A2,CTTN,CYP51A1,DDIT3,DLX3,EBF1,EDNRB,EGR1,EGR2,ELAVL4,EMP3,ENPP2,ETNPPL,ETV1,FDFT1,FGF1,FOLR1,FOS,FOSL1,GABRG1,GABRG2,GADD45G,GAP43,GLUL,GNAL,GPR88,GPX3,GRIN2A,GRM1,GSN,HMGA1,HMGCR,HMGCS1,HOXB9,JUN,JUNB,JUP,KCNC4,KCNQ2,LDHB,LTF,Mt1,Mt3,MYT1L,NEFH,NEFL,Nefm,…	448 (22)
TNF		cytokine	Activated	4.746	1.09e-28	1810058I24Rik,A2M,ACOD1,ADORA1,AKAP12,ALCAM,APLN,AR,ARHGEF4,ARHGEF40,ATF3,BBC3,BCL2L11,BCL3,BCL6,BMP4,BMPER,C4A/C4B,CALHM6,CCL28,CCL4,CCND1,CCND2,CD274,CD83,CDK2,CDKN1A,CEBPB,CFTR,CH25H,CHST11,CLCF1,CLDN1,CLEC4E,CLIC4,COL1A2,COL3A1,CRH,CTTN,CYP11A1,CYP7B1,DDIT3,DUSP1,EDIL3,EDNRB,EGR1,EGR2,EGR3,EHD1,ELMO1,EMP1,ENPP2,ESR1,FOS,FOSB,FOSL1,FOSL2,FRZB,GABRG2,GADD45A,GADD45B,GADD45G,GBP6,GFPT2,GJA1,GNAI…	433 (17)
lipopolysaccharide		chemical drug	Activated	5.093	2.4e-28	1810058I24Rik,ACOD1,ACOT2,ADAMTS1,ADORA1,AHR,ALCAM,ANGPTL2,ANXA2,ANXA3,AOAH,APOBR,AR,ARHGEF3,ATF3,ATP1A2,BAG3,BCL2L11,BCL3,BCL6,BMP4,C1QC,CALHM6,CCL4,CCND1,CCND2,CD274,CD63,CD68,CD83,CD8A,CDKN1A,CEBPB,CFTR,CH25H,Chil3/Chil4,CLDN1,CLEC4D,CLEC4E,CLIC4,CMPK2,CNKSR3,CNTN1,COL1A2,COL3A1,COL4A1,COL4A2,COL4A6,COL5A3,COX6A2,CRH,CYP11A1,CYP7B1,DDIT3,DDX60,DHCR24,DUSP1,DUSP8,EGR1,EGR2,EGR3,EHD1,EMB,ENPP2,F…	416 (14)
IFNG		cytokine	Activated	4.836	4.7e-27	A2M,ACOD1,ADGRG1,ADGRG2,ADORA1,AHR,ALKAL2,ATF3,ATP1B1,BBC3,BCL2L11,BCL3,C1QC,C4A/C4B,CALB1,CALB2,CALHM6,CCL28,CCL4,CCND1,CCND2,CCNO,CD274,CD63,CD68,CD83,CDK2,CDKN1A,CEBPB,CFTR,CH25H,CHAC1,Chil3/Chil4,CHST11,CLEC4E,CLIC4,CMPK2,COL1A2,CTSH,CYP11A1,DDIT3,DDR2,DDX60,DUSP1,EDNRB,EGR1,EGR2,EGR3,ELAVL2,ENDOD1,FBLN1,FGF1,FGF12,FLRT2,FOS,FOSB,GADD45B,GBP6,GBP7,GJA1,GLUL,HDAC9,HLA-A,HMGA1,HMGCR,HMGCS1,HMOX…	380 (17)
ESR2		ligand-dependent nuclear receptor	Activated	2.77	4.03e-26	ADAMTS1,ADORA1,AKAP12,ANGPTL2,AR,ATF3,ATF5,BBC3,BMP4,C3orf80,CCL28,CCND1,CD79A,CDKN1A,CLDN1,CNNM1,COL1A2,COL5A3,CTSH,CYP11A1,DDAH1,DHCR24,EFEMP2,EGR1,EGR3,ELAVL2,EMB,EMP3,ENPP2,ESR1,ETV1,FAM110C,FBLN1,FBLN2,FBLN5,FBN1,FMOD,FOS,FOSL2,GABBR2,GADD45B,GJA1,GPNMB,GPX3,GREB1,HELLS,HMGA1,HMGCR,HMGCS1,HTR1A,IDI1,IFI44,IFIT3,IGFBP3,INSIG1,JUNB,KCNJ3,KITLG,KRT6B,LAMB3,LMNA,LOXL1,LPL,LRATD1,LRP1B,LTBP1,MDK,…	479 (19)
PDGF BB		complex	Activated	4.035	1.75e-25	ACAT2,AHR,AKAP12,ATF3,BCL3,BMP4,CCND1,CCNO,CDK2,CDKN1A,CEBPB,COL18A1,COL1A2,COL3A1,DDIT3,DUSP1,EDNRB,EGR1,EGR2,EGR3,FBLN5,FLNA,FOS,FOSB,FOSL1,FRZB,GADD45A,GFPT2,GJA1,GLUL,HMGCR,HMGCS1,HMOX1,IER2,ITGA5,JUN,JUNB,KLF10,KLF6,LGALS3,LIF,LMNA,MAFK,MMP9,Mt1,MYC,NFIL3,NOX4,PCOLCE,PDGFRA,PIM1,PLAT,RGS2,SCD,SERPINE1,SHH,SLC7A1,SOCS3,SPHK1,STAT3,TGM2,TNFRSF12A,TRIB3,ZFP36L1	419 (19)
CG		complex	Activated	2.596	1e-24	ADAMTS1,ADCYAP1,ANGPTL2,APLN,AR,BMP4,BMPR1B,C3orf80,C4A/C4B,CCND1,CCND2,CDKN1A,CEBPB,CNNM1,CRYBG1,CYP11A1,CYP26A1,CYP51A1,CYP7B1,DUSP1,EDN2,EGR1,ELAVL2,EMB,EMP1,ENPP2,ETV1,FAM110C,FGF12,FGF9,FLRT2,FOS,FOSL1,FOSL2,GADD45B,GAL,GBP6,GJA1,GREM2,HAPLN1,HELLS,HLA-A,HMGA1,HMGCR,HMGCS1,IFIT3,IGFBP3,INHBB,ITGA3,JUN,JUNB,KCNJ3,KCTD11,LIF,LRP1B,MMP19,MMP9,MYC,NIBAN1,PGR,PLAT,PLAUR,PLXND1,POLA2,PRLR,PTGFR,RG…	424 (21)
tetradecanoylphorbol acetate		chemical drug	Activated	4.726	1.94e-24	ADAMTS1,ADCYAP1,ALOXE3,ATF3,BCL3,BMP4,BMP7,CCL4,CCND1,CCND2,CD68,CDKN1A,CFTR,CH25H,CHRNA6,CLCF1,CLDN1,CRH,CRHBP,CTSH,CTTN,CYP11A1,DDIT3,DSG1,DUSP1,DUSP8,DYNC1I1,EGR1,EGR2,EGR3,EIF4EBP1,ESR1,ETNPPL,EZR,FAM83G,FBN1,FHL5,FOS,FOSB,FOSL1,FOSL2,GADD45B,GAL,GAP43,GJA1,GNB3,GRIN2A,GSTM1,HAPLN1,HDC,HMGA1,HMOX1,HTR1A,HTR1D,IGFBP3,IL1RN,INHBB,ITGA5,JAK3,JUN,JUNB,KLF6,LAMB3,LIF,LPL,LTBR,MMP19,MMP9,MYC,MYH9,N…	433 (18)
APP		other		1.167	3.52e-24	ADCYAP1,ATP1A2,ATP1B1,BACE2,BBC3,BCL2L11,BMP4,C4A/C4B,CALB1,CALML4,CAST,CCL4,CCND1,CCND2,CD68,CDK2,CDKN1A,CEBPB,CH25H,Chil3/Chil4,CLDN1,CLIC1,CMPK2,COL18A1,CPLX1,CRABP2,CTTN,DDAH1,DDIT3,DIRAS2,EGR1,EIF5A2,ELAVL4,ENPP2,EOMES,ESR1,FKBP1B,FLNA,FOLR1,FOS,FOSB,GABBR2,GAP43,GBP6,GRIN2A,HECW1,HEY1,HK1,HMGA1,HMGCR,HMOX1,Hrk,HSPB1,HSPG2,IL27,INA,ITGA3,JUN,JUNB,KCNC4,KCND2,LDHB,LGALS3,LIF,LIMK1,LRP1B,MAFF,…	439 (27)
NGF		growth factor	Activated	2.869	1.72e-22	A2M,ANXA2,ATF3,BBC3,BCL2L11,CCL4,CCND1,CD83,CDK2,CDKN1A,CHRNB4,CRH,DUSP1,DUSP8,ECEL1,EGR1,EGR2,ELAVL4,FOS,FOSL1,FOSL2,GADD45A,GADD45G,GAL,GAP43,GRIN2A,HMOX1,Hrk,IER2,JUN,JUNB,KCTD11,MAFK,MMP9,MYC,Nefm,NKD1,P2RX2,PLAUR,PPP2R2C,PRKAR2B,RELA,RGS4,SCN2A,SHTN1,SNAP25,SQSTM1,STAT3,STMN4,TNFRSF12A,VGF,VIP	388 (21)
EGF		growth factor	Activated	5.094	9.6e-22	ACOT2,ADAMTS1,ALCAM,AR,ARHGEF2,ATF3,BBC3,CCND1,CCND2,CD274,CDC42EP1,CDK2,CDKN1A,CEBPB,CLDN2,COL1A2,COL3A1,COL4A2,CRABP2,CYP11A1,DDIT3,DNMT3B,DUSP1,EGR1,EGR2,EGR3,EMP1,EOMES,ESR1,EZR,FAM83G,FOS,FOSB,FOSL1,FOSL2,GADD45A,GAL,GBX2,GFPT2,GJA1,GLUL,HMGCS1,HMOX1,IDI1,IER2,IFITM2,IGFBP3,INSL3,JUN,JUNB,KCTD11,KLF10,LAMB3,LTF,MMP9,MYC,Nes,PDK4,PGR,PLAT,PLAUR,PTPRN,RELA,RUNX1,S100A10,S100A9,SCD,SDC1,SEMA6A,…	446 (19)
AGT		growth factor	Activated	4.952	3.24e-21	ACAT2,ALKAL2,ANGPTL2,ANXA3,APLN,ATF3,ATP1B1,C4A/C4B,CCBE1,CCL4,CCND1,CCND2,CD68,CDK2,CDKN1A,COL18A1,COL1A2,COL3A1,COL4A1,COL4A2,COL4A6,COL6A3,COLEC10,CRABP2,DUSP1,DYNC1I1,EDNRB,EGR1,ESR1,ETV1,FBLN5,FDFT1,FIBIN,FOS,FOSL1,FRZB,GALNT13,GAP43,GJA1,GLI2,GSTM5,HEY1,HHIPL1,HMGCR,HMGCS1,HMOX1,HSPB1,HSPG2,IDI1,IGFBP3,IGFBP7,INHBB,ITGA3,ITGA5,ITGA7,JUN,KITLG,LGALS3,LGI3,LIF,LOXL1,LRRC55,LRRC7,LTBP1,MATN2,M…	413 (18)
PD98059		chemical - kinase inhibitor	Inhibited	-4.024	4.25e-21	ACAT2,ACOT7,AKAP12,AR,ATF3,BBC3,BCL2L11,BCL6,CCL4,CCND1,CCND2,CD83,CDC42EP1,CDK2,CDKN1A,CEBPB,CHN1,CHRNB4,COL1A2,COL3A1,COL4A1,CRH,CTSH,DDIT3,DSG1,DUSP1,EDNRB,EGR1,EGR2,EGR3,EMP1,EMP3,FOS,FOSB,FOSL1,GADD45A,GAP43,GJA1,HMOX1,IGFBP3,IL1RN,INSIG1,JUN,JUNB,LAD1,LAMA5,LPL,MMP9,MSTN,MYC,PAX2,PDGFRA,PGR,PIM1,PLA1A,PLAT,PLAUR,RAB20,RELA,RUNX1,S100A10,SDC1,SERPINE1,SH2D1A,SHH,SLC3A2,SOCS3,SPP1,SPRR1A,SRXN…	397 (20)
STAT3	0.575	transcription regulator	Activated	2.775	1.23e-20	A2M,AHR,ANGPTL2,APLN,BCL2L11,BCL3,BCL6,CALHM6,CCL4,CCND1,CCND2,CD274,CD83,CDKN1A,CEBPB,CMPK2,COL1A2,COL24A1,COL3A1,CTTN,CYP26A1,DDIT3,DNMT3B,DUSP1,EBF1,EGR1,EGR2,EGR3,ENPP2,EOMES,ESR1,FBN1,FOS,GADD45A,GADD45G,GAP43,GBE1,GBP6,GBX2,GJA1,HEY1,HLA-A,HMOX1,IFI44,IFIT3,IFITM2,IL1RN,ITGA5,JUNB,KCTD11,LAMB3,LDHB,LGI2,LIF,LTBR,LTF,MMP9,MT-ATP6,Mt1,Muc1,Mx2,MYC,MYD88,NFKBIE,NOTCH3,NOX4,PGR,PIM1,PLAUR,PTPN6…	386 (17)
U0126		chemical drug	Inhibited	-2.686	1.31e-19	ARHGEF2,ATF3,BCL2L11,CCL4,CCND1,CCND2,CCNO,CD274,CDK18,CDK2,CDKN1A,CEBPB,CFTR,CLCF1,CLDN2,COL4A1,CYP11A1,DDAH1,DDIT3,DUSP1,EDNRB,EGR1,EGR3,EIF4EBP1,ELOVL6,EMP1,ENPP2,ESR1,ETV1,FOLR1,FOS,FOSB,FOSL1,GADD45B,GFPT2,GJA1,GSN,HAPLN1,HMGCR,HMOX1,IDI1,IER2,IL1RAP,ITGA3,ITGA5,ITPKC,JUN,JUNB,KLF10,LAMB3,LIF,LPL,MMP9,MYC,NETO2,NRN1,PGR,PLAUR,RUNX1,S100A9,SERPINE1,SHH,SOCS1,SOCS3,SPP1,SPRR1A,SRXN1,STAT3,STC2…	410 (21)
dexamethasone		chemical drug		1.524	1.71e-19	ACOT7,ADAMTS1,ADAMTS19,AKAP12,ALCAM,ANXA3,APLN,ARHGEF2,ATF3,ATP1B1,BBC3,BCL2L11,BCL3,BCL6,CALB1,CAST,CCL4,CCND1,CCND2,CD274,CD83,CDK2,CDKN1A,CEBPB,Chil3/Chil4,CLEC4D,CLIC1,CLIC4,CMPK2,COL1A2,COL3A1,COL4A1,COL4A2,COL4A5,CRABP2,CRH,CRHBP,CRYBG1,CYP11A1,CYP26A1,CYP2S1,CYP51A1,DDIT3,DHCR24,DUSP1,EBF1,EDN2,EDNRB,EGR1,EGR2,EGR3,EIF4EBP1,ELOVL1,ELOVL6,ETNPPL,EZR,F5,FBLN1,FBLN2,FBN2,FGF1,FLRT2,FOS,FOSB,F…	431 (21)
IL1B		cytokine	Activated	4.316	3.05e-19	A2M,ACOD1,ADAMTS1,ANGPTL2,ATF3,ATF5,BBC3,BCL2L10,BCL3,BCL6,BMP4,BMP7,C4A/C4B,CALB1,CCL28,CCL4,CCND1,CD274,CD83,CDKN1A,CEBPB,CFTR,CLDN1,CMPK2,CRH,CSRNP1,CYP11A1,CYP7B1,DDIT3,DUSP1,EDNRB,EGR1,EHD1,EIF4EBP1,ENPP2,ESR1,ETV1,FOS,FOSB,FOSL1,GADD45A,GADD45B,GBP6,GJA1,GLI2,HELLS,HLA-A,HMGA1,HMOX1,Hrk,HSPB1,HSPB8,HSPG2,IER2,IFIT3,IFITM2,IGFBP3,IL1RAP,IL1RN,IL27,ITGA3,ITGA5,JUN,JUNB,JUP,KCNC4,KLF10,LAMB3,L…	384 (16)
JUN	0.813	transcription regulator	Activated	2.714	9.71e-19	A2M,ACAT2,AKAP12,ANGPTL2,ANXA2,AR,ATF3,BBC3,BCL2L11,BCL3,CCND1,CCND2,CD274,CD68,CDKN1A,CLDN2,COL1A2,COL24A1,CRH,CYP11A1,DUSP1,EZR,FBLN5,FLNC,FOS,FOSL1,FRZB,GADD45A,GAP43,GJA1,GREB1,HEY1,HK1,HMGA1,HMOX1,Hrk,IGFBP3,IGFBP7,IL27,JUN,JUNB,LAMB3,LGALS3,LIF,LMNA,LMO1,LTBP1,MMP9,MYC,NEFH,NUPR1,PGR,PIM1,PLAUR,PTPN6,PTPRN,S100A10,SCD,SDC1,SERPINE1,SHH,SLC7A1,SNCG,SOCS3,SPHK1,SPP1,SPRR1A	462 (22)
HRAS		enzyme		0.592	1.2e-18	A2M,ANXA2,ANXA3,BCL2L11,BMP4,BMP7,C1QC,CCND1,CCND2,CDK18,CDK2,CDKN1A,CEBPB,CHST11,CLCF1,COL18A1,COL1A2,COL3A1,COL4A1,CRABP2,DDIT3,DNMT3B,DUSP1,EFEMP2,EGR1,EIF4EBP1,EIF5A2,ETV1,FAM167A,FBLN2,FDFT1,FLNA,FLRT2,FOS,FOSB,FOSL1,FOSL2,GADD45G,GJA1,GPX3,GSN,HDC,HEY1,HMOX1,HOXB9,HSPB1,IFITM2,IGFBP3,ITGA5,JUN,JUNB,JUP,KLF6,LOXL1,MMP9,MSMO1,MYC,NID2,OAF,PDGFRA,PLAUR,PLS3,PRKCD,PTGFRN,PWWP3B,RASGRP1,RBPMS,RE…	391 (20)
decitabine		chemical drug		1.397	1.41e-18	ADAMTS1,AKAP12,ANXA2,AR,B3GALT5,BCL2L11,BMP4,CCND1,CCND2,CD8A,CDA,CDKN1A,CFTR,Chil3/Chil4,CHRNB3,CNTN1,COL1A2,COL3A1,COL6A3,CRABP2,CYP11A1,CYP26A1,DDR2,DNMT3B,DSG2,DUSP1,EFNB1,EGR3,EHD1,ELOVL6,ESR1,EZR,FBN2,FLNC,GADD45B,GADD45G,GAP43,GLI2,GRIN2A,GSN,HELLS,HIC1,HLA-A,HOXB9,HSPB8,HTR1B,IGFBP3,IGFBP7,IL1RAP,IRX1,ITGA3,JUNB,JUP,KLF6,LGALS3,LTBP1,MGST3,MMP9,MYC,MYO1B,NEFL,NPTX1,OLFM1,PCDH9,PDLIM4,PGR,…	420 (21)
IGF1		growth factor	Activated	3.175	2.12e-18	A2M,ATP2B3,BBC3,BCL2L11,BMP4,C4A/C4B,CCL4,CCND1,CCND2,CDK2,CDKN1A,CEBPB,COL1A2,COL3A1,CYP11A1,DDIT3,DHH,DUSP1,EDN2,EGR1,EGR2,ESR1,FBLN1,FBLN2,FOS,FOSB,GADD45A,GADD45G,GAP43,HAPLN1,HDC,HMGA1,HMGCR,HMOX1,IER2,IGFBP3,INSL3,ITGA3,ITGA5,JUN,JUNB,KCNJ5,KCNQ2,KLF6,LPL,MDK,MSTN,MYC,NEFH,Nefm,NOX4,NUPR1,OLFM4,PCK2,PCOLCE,PDGFRA,PGR,PIM1,PLAUR,POLD4,PRLR,RELA,RND1,SCD,SERPINE1,SNCG,SOCS3,SPP1,TGM2,THY1,TNF…	395 (19)
mifepristone		chemical drug		-1.33	2.59e-18	ACOD1,AR,ATF3,BMP7,CAST,CCND1,CD274,CDKN1A,CEBPB,CFTR,COL18A1,CRH,DUSP1,EDNRB,EGR1,EGR2,FBLN2,FDFT1,FOS,GAL,GJA1,GSTM1,HDC,HLA-A,IGFBP3,INHBB,JAK3,JUN,JUNB,JUP,KRT6B,LAMA5,LAMB3,LTF,MMP9,Mt1,Muc1,MYC,NOX4,OGN,PDGFRA,PGR,PLAT,RELA,RFX2,RGS2,RHOC,SERPINE1,SFRP1,SNAP25,SOX11,SPP1,TNFAIP6	448 (23)
TP53		transcription regulator		1.552	2.68e-18	A2M,AKAP12,ANXA2,ANXA3,APBB2,AR,ARHGEF2,ARHGEF4,ATF3,BAG3,BBC3,BCL2L11,BCL3,C1QC,CAND1,CCL4,CCND1,CCND2,CDH10,CDK2,CDKN1A,CDT1,CEBPB,Chil3/Chil4,CLIC4,COL18A1,COL1A2,COL3A1,COL4A1,COL4A2,COX6A2,CTSH,CYP51A1,DDIT3,DHCR24,DNMT3B,DUSP1,EDIL3,EGR1,EGR2,EGR3,ENPP2,ESR1,EZR,F5,FBLN2,FDFT1,FKBP1B,FLRT2,FOS,FOSL1,GADD45A,GADD45B,GADD45G,GBX2,GJA1,GLI2,GLUL,GNAI1,GPR176,GPX3,GSN,GSTM1,GSTM5,HDAC9,HDC,HIC1…	456 (21)
ESR1	-0.494	ligand-dependent nuclear receptor		-0.445	2.69e-18	ADORA1,ALCAM,ANGPTL2,ANXA3,AR,ARHGEF2,ATF3,ATF5,ATP1B1,BCL2L11,BCL6,BMP4,CALB1,CALML4,CAMK1,CCL4,CCND1,CD83,CDK2,CDKN1A,CEBPB,CLDN1,CLDN2,CPLX1,CRABP2,CYP11A1,CYP7B1,DHCR24,DSG1,DSG2,EGR1,EGR3,EIF5A2,ENPP2,ESR1,FBLN1,FGF12,FLNA,FOLR1,FOS,FOSB,FOSL1,FOSL2,GABBR2,GADD45B,GADD45G,GAL,GJA1,GLI2,GREB1,GSN,HELLS,HEY1,HMGCR,HTR1A,IFI44,IFITM2,IGFBP3,INHBB,INSL3,JAK3,JUN,JUNB,KLHL13,KRT6B,LPL,LTBP1,LTF,M…	509 (19)
trichostatin A		chemical drug		0.799	4.8e-18	ACOT7,ADAMTS1,AHR,AKAP12,AR,AVIL,BBC3,BCL2L11,BMP4,CAST,CCND1,CCND2,CDKN1A,CEBPB,CLDN1,CNTN1,COCH,COL1A2,COL6A3,CRABP2,CYP26A1,DDR2,DNMT3B,DSG2,DUSP1,EFNB1,EHD1,ELOVL6,ENPP2,ESR1,EZR,FBLN1,FOS,FOSL2,FRZB,GADD45A,GADD45G,GAP43,GLI2,GREB1,GSN,GSTM5,HDAC9,HMGCR,HMGCS1,HMOX1,HOXB9,IGFBP3,IGFBP7,IL1RAP,INA,JUP,KRT6B,LMNA,LTBP1,MGST3,MMP9,MYC,MYO1B,NEFH,NEFL,Nefm,Nes,OLFM1,PCDH20,PGR,PIK3CD,PIM1,PLAUR,…	430 (21)
KRAS		enzyme		0.349	8.03e-18	AHR,ARHGEF2,ATF3,ATF5,ATP1B1,BMP4,CAMK1,CCND1,CD274,CDKN1A,CDT1,CEBPB,CFTR,COL3A1,COL4A1,DDAH1,DDIT3,DUSP1,EGR1,EGR2,ETV1,FBLN2,FBN1,FOS,FOSB,FOSL1,FRRS1L,GADD45A,GJA1,GLI2,GLUL,GSN,GSTM1,HMGA1,HMOX1,HSPB1,HSPG2,IFITM2,JUN,JUNB,KLF6,LAMA5,LAMB3,LGALS3,LGI3,LIF,MMP9,MT-ATP6,Muc1,MYC,NETO2,NKD1,NRN1,OLFM4,PCOLCE,PDE4B,PDGFRA,PIM1,PLA1A,PLAT,PLCD1,PPP1R1C,PRKCD,PRPH,PTPN6,RAB20,RAB27A,RELA,RHEBL1,RH…	434 (20)
estrogen receptor		group		-0.497	1.29e-17	BMP7,CALB1,CALB2,CCND1,CCND2,CD68,CDH10,CNNM1,CNNM4,COL4A1,COL4A2,COL4A5,COL4A6,DSP,EGR1,FGF1,FGF12,FLNC,FOS,GAL,GREB1,ITGA3,JUN,JUP,KLF10,LTF,MMP9,MYC,NCAM2,NOTCH3,PCDH10,PCDH18,PCDH20,PCDH7,PDK4,PGR,PLAUR,PRLR,RGS2,SERPINE1,SHH,SYNPO,TGM2,TSC22D3,UGT8	498 (24)
nelfinavir		chemical drug	Activated	3.985	1.78e-17	ADM2,ALDH1L2,APOBR,ARHGEF2,ATF3,CH25H,CHAC1,DDIT3,DDR2,HHIPL1,HMOX1,ISL2,MMP9,MTHFD2,NFIL3,NUPR1,PCK2,PSAT1,Serpina3g (includes others),SESN2,SLC1A4,SLC7A11,STC2,STK40,TRIB3,TSC22D3	88 (3)
ATF4		transcription regulator	Activated	5.142	1.99e-17	ATF3,ATF5,ATP1A2,BBC3,CAST,CDC42EP1,CDKN1A,CEBPB,CHAC1,COL4A2,DDIT3,DDR2,EIF4EBP1,GADD45A,IGFBP7,JUN,LGALS3,MTHFD2,NID2,NOX4,NUPR1,PCK2,PHGDH,PSAT1,PYCR1,SERPINF1,SESN2,SH3BP2,SHMT2,SLC1A4,SLC3A2,SLC7A1,SLC7A11,SLC7A3,SLC7A5,STAT3,STC2,STK40,TNFRSF12A,TRIB3	365 (20)
LY294002		chemical drug		-0.799	2.22e-17	ADAMTS1,AR,ATF3,BBC3,BCL2L11,BCL6,CCND1,CCND2,CD274,CD83,CDK2,CDKN1A,CEBPB,CHML,CHRNB4,COL1A2,CYP11A1,DDIT3,DHCR24,DUSP1,EDIL3,EGR1,EGR2,EGR3,ESR1,FDFT1,FLRT2,FOS,FOSB,FOSL1,GJA1,HAPLN1,HMGCR,HMGCS1,HMOX1,IDI1,IER2,IGFBP3,IL1RN,INHBB,JUN,JUNB,JUP,KLF10,LAMB3,LIF,LMNA,LOXL1,MMP9,MTHFD2,MYC,NEFH,NPTX1,NRN1,NTRK3,PDE4B,PIM1,RAB6A,RELA,RGS2,SCD,SEMA3C,SERPINE1,SHH,SOCS3,SPP1,TNFRSF1B,VAMP1	379 (19)
FGF2		growth factor	Activated	4.14	2.31e-17	AR,BBC3,BCL6,BMP4,CALB1,CCND1,CCND2,CD274,CDK2,CDKN1A,COL1A2,COL3A1,CRABP2,CYP11A1,DDIT3,DNMT3B,EDNRB,EGR1,ELAVL4,ENPP2,EOMES,ETV1,FBN1,FLNA,FOS,FOSL1,GADD45A,GAL,GAP43,GBX2,GJA1,GPNMB,GRIN2A,HMGA1,IFITM2,IGFBP3,ITGA3,ITGA5,JUN,JUNB,LMNA,MMP9,MYC,Nes,NKD1,PCSK2,PDGFRA,PLAT,PLAUR,PRKCD,RUNX1,S100A10,SCD,SDC1,SERPINE1,SFRP1,SHH,SOCS3,SPHK1,SPP1,SQSTM1,ST3GAL4,TNFRSF12A,TUBB3,VGF	402 (18)
BDNF		growth factor		-0.279	6.8e-17	ACOT7,ADCYAP1,ANXA2,AR,ARPP21,BAG3,BCL2L11,BMP7,CALB2,CCND2,CDKN1A,CEBPB,DUSP1,EGR1,EGR2,EGR3,ELOVL6,FLNA,FOS,FOSB,GAP43,GLUL,GNAI1,GRIN2A,HMGCR,INHBB,JUN,KIF5A,KLF10,LIMK1,NELL2,OMG,PRSS12,PVALB,RGS4,RPRM,S100A10,S100A9,SFRP1,SH3BGRL2,SHH,Sik1,SNAP25,SORL1,SPP1,SYNPO,TTC3,TUBB3,UCN,VGF,VSNL1	370 (23)
POU4F1	-1.457	transcription regulator		-0.866	1.28e-16	ADCYAP1,ADGRG2,AVIL,CACNG5,CALB2,CDKN1A,CHRNB4,ETV1,GAL,GBX2,INA,IRX1,IRX2,ISL2,KCTD8,LILRB3,NTRK3,NWD2,PIRT,POU4F1,POU4F2,POU4F3,PPP1R1C,PRPH,PVALB,RUNX1,SCN7A,SNAP25,SNCG
NFKBIA		transcription regulator		1.378	1.38e-16	A2M,ACOD1,B3GALT5,BCL3,CCND1,CCND2,CDK2,CDKN1A,CEBPB,CFTR,CH25H,COL1A2,COL3A1,CYP7B1,DDIT3,ENPP2,EOMES,FOS,GADD45A,GADD45B,GADD45G,GPR176,GPX3,GSTM5,HEY1,HLA-A,HMGA1,HMOX1,IL1RN,ITGA3,JUN,JUNB,LAMA5,LIF,LITAF,LYNX1,MEX3A,MMP9,Mt1,MYC,NFKBIE,NOTCH3,OGN,OLFM4,PCDH7,PIM1,PLAT,RELA,RGS4,RIPK1,S100A9,SDC1,SEMA3C,SFRP1,SHH,SOCS3,SOD3,SORL1,TNFRSF1B,TRPC1	352 (18)
MYC	0.794	transcription regulator		1.688	1.41e-16	ACOD1,ADAMTS1,ADK,AHR,AKAP12,ALCAM,AR,BBC3,BCL2L11,BCL6,BMPER,CAST,CCND1,CCND2,CD274,CDK2,CDKN1A,CLDN1,CLIC4,COL1A2,COL3A1,COL4A1,COL4A2,COL6A3,CRABP2,CYP26A1,DDIT3,DLX3,DNMT3B,DSP,DUSP1,EBF1,EGR1,EGR2,EIF4EBP1,EMP1,EOMES,EZR,FBLN2,FBLN5,FBN1,FBN2,FLNA,FMOD,FOS,FOSL1,FRZB,GADD45A,GADD45B,GADD45G,GBX2,GJA1,GLI2,GLUL,GREB1,HAPLN1,HLA-A,HMGA1,HMOX1,HSPB1,IFI44,IFIT3,IL1RAP,ITGA3,JUN,KIFAP3,KLF10,KLF…	392 (21)
TSC2		other	Inhibited	-2.486	2.49e-16	A2M,ANXA2,ATF3,BCL3,CCND1,CCND2,CD68,CDKN1A,DDIT3,DYNC1I1,EGR1,EGR2,EMP3,ENPP2,FOS,GAP43,GPNMB,GSN,HMOX1,HSPB1,IFI44,LDHB,LGALS3,Mt1,NIBAN1,NKD1,NTRK3,OLFM4,PDGFRA,PDK4,PVALB,RASSF4,RELA,SCD,SOCS3	281 (18)
SB203580		chemical drug	Inhibited	-3.262	4e-16	ACOT2,ANXA3,AR,ATF3,BBC3,BCL2L11,BMP4,C4A/C4B,CCL4,CCND1,CD274,CD83,CDKN1A,CEBPB,CLDN1,COL1A2,COL3A1,CTSH,CYP51A1,DDIT3,DUSP1,EDNRB,EGR1,FDFT1,FOS,FOSB,GADD45A,GJA1,GPR88,HAPLN1,HMOX1,IFIT3,IGFBP3,IL1RN,JUN,JUNB,MMP9,MSTN,MYC,NEFH,NKD2,NOX4,P2RX2,PAX2,PDE4B,PDGFRA,PLA1A,PLAT,PLAUR,RELA,RND1,RUNX1,S100A10,SERPINE1,SMYD1,SOCS3,SOD3,SPP1,STC2,TGM2,TNFAIP6,WLS	362 (19)
SMARCA4		transcription regulator		1.275	4.06e-16	A2M,ADGRG1,AHR,ANGPTL2,ARHGAP30,BMP4,CALB2,CCND1,CCND2,CD63,CDK2,CDKN1A,CEBPB,CLCF1,CLDN1,CNTN1,CORO6,CRYBG1,CTSH,CYB5R2,CYP26A1,EBF1,EFNB1,EGR1,ELOVL6,EMP3,ENTPD3,FADS3,FAM167A,FGF9,FOLR1,FOS,FOSL2,GADD45A,GADD45B,GADD45G,HEY1,HK1,HKDC1,IFITM2,IGFBP3,IGFBP7,ITGA3,ITGA5,ITGA7,JUN,KIFAP3,LGALS3,LMNA,MAFF,Mt1,MYC,MYT1L,PDE4B,PHLDB1,PLAT,PLAUR,PLEKHG2,PLEKHO1,PPP1R14C,PTP4A1,RAB27A,RAB38,RGS2,SERPIN…	403 (20)
MAPK8		kinase	Activated	2.727	4.35e-16	BBC3,BCL2L11,BMP4,CCND1,CDK2,CDKN1A,CEBPB,CYP11A1,DDIT3,DUSP1,EGR1,EOMES,FOS,FOSL1,FOSL2,GADD45A,GSTM1,HMGCR,HMGCS1,HMOX1,Hrk,JUN,KLF6,LIF,MMP9,MVP,MYC,NEFL,NOX4,PLAUR,RELA,RGS4,SESN2,SHH,TRHR,TSC22D3	390 (20)
FOS	0.498	transcription regulator		1.699	4.86e-16	A2M,APLN,ATF3,BCL2L11,CAST,CCND1,CD68,CLDN2,COL18A1,CRABP2,CRH,CTSH,EGR1,EGR2,ELOVL6,EMB,EZR,FBN1,FLRT2,FOS,FOSB,FOSL1,FRZB,GJA1,GREB1,HMOX1,Hrk,HSPB8,IL27,JUN,JUNB,KITLG,KLF6,LAMB3,LGALS3,LPL,LTBP1,LYPD6,MAFK,MMP9,MYC,MYH9,NFIL3,NPTX1,NUPR1,PCDH11X,PGR,PIM1,PLAT,PLAUR,PTP4A1,PTPRN,RAPGEF3,RGS4,RIPK1,RUNX1,S100A10,S100A9,SCD,SDC1,SEMA3A,SERPINE1,SNCG,SOCS3,SPHK1,SPP1,SUMO2,Tpm4	370 (20)
D-glucose		chemical - endogenous mammalian		1.452	5.88e-16	ACVR1C,ANXA3,APLN,ATF3,ATF5,ATP2B3,BBC3,BCL2L11,BMP4,BVES,CALB1,CCND1,CCND2,CDKN1A,CDT1,CEBPB,COL1A2,COL3A1,COL4A1,COX6A2,DDIT3,DIRAS2,DUSP1,EGR1,ELOVL6,ENPP2,FOS,GJA1,GLUL,GSN,HAPLN1,HK1,HMGCR,HMOX1,Hrk,HSPB1,IER2,INHBB,ITGA5,JUN,JUNB,KLF10,LPL,MIDN,MLXIPL,MMP9,Mt1,MYC,NOX4,NR1H4,PAX2,PCK2,PCSK2,PDGFRA,PGM2,PLAUR,PLCB1,PRKCD,PTPN6,PTPRN,PYCR1,RDH10,RELA,RGS2,RUNX1,SCD,SEMA6A,SERPINE1,SLC3A2,SLC7…	415 (20)
PPARGC1A		transcription regulator	Inhibited	-3.711	7.77e-16	A2M,ADAMTS1,ADGRG1,ATP2B3,BBC3,BMP4,BMPER,CD68,CDC42EP1,CDKN1A,CEBPB,COL1A2,COL6A3,CPLX1,CYP11A1,ELMO1,FBLN1,FBLN2,FIBIN,FOS,GADD45B,HAPLN1,HMOX1,IGFBP3,IGFBP7,IL1RAP,IL1RN,INHBB,INSIG1,LDHB,LIF,LPL,MMP19,MSMO1,MYC,MYD88,NEFH,NR1H4,OGN,PCK2,PDK4,PODN,PVALB,RELA,SCD,SEMA3A,SEMA3C,SEMA6A,SESN2,Sik1,SMYD1,SOCS1,SOCS3,STAT3,SYT2,THY1,TNFRSF12A,TRIB3	338 (21)
MAPK9		kinase		0.01	9.38e-16	BBC3,BCL2L11,BMP4,CDKN1A,CDT1,CEBPB,EGR1,EOMES,FOS,FOSL1,FOSL2,GADD45A,GADD45B,GSTM1,HDC,HMGA1,HMGCR,HMGCS1,IER2,JUN,JUNB,KLF6,LIF,LMNA,LPL,MARCKSL1,MMP9,MYC,PLA1A,PLAT,SCD,SHH,SLFN12L,SOD3,ZYX	433 (19)
MRTFA		transcription regulator		1.736	1.7e-15	ALCAM,COL3A1,COL4A5,COL6A3,CTTN,DDAH1,DHCR24,DSG1,EGR1,EGR2,EGR3,EZR,FIBIN,FLNA,FLRT2,FOS,GADD45A,GSTM5,HLA-A,Ifitm1,ITGA5,LIMK1,LMNA,LTF,MAFK,MMP9,MYH9,P2RY1,PDGFRA,PGR,RAB27B,RUNX1,S100A9,SEMA3D,SERPINE1,SPOCK3,Tpm4,TST	342 (18)
tretinoin		chemical - endogenous mammalian		1.899	1.83e-15	A2M,AHR,AKAP12,ALOXE3,ANXA2,APLN,AR,ATF3,B3GALT5,BCL3,BCL6,BMP4,BMPR1B,CACNG5,CALB1,CCL4,CCND1,CCND2,CD274,CD63,CD68,CDK2,CDKN1A,CEBPB,CFTR,Chil3/Chil4,CLDN1,COL1A2,COL3A1,COL4A1,COL4A2,COL4A5,COL6A3,CRABP2,CRH,CSRNP1,CYP11A1,CYP26A1,CYP2S1,DDIT3,DDX60,DNMT3B,DSG1,DSP,DUSP1,EFNB1,EGR1,EHD1,EIF4EBP1,EMP3,ENPP2,EOMES,ETV1,FBN2,FGF12,FOS,FOSL1,FOSL2,GAL,GAP43,GBX2,GJA1,GLI2,HEY1,HK1,HLA-A,HMGA1,HMOX…	442 (18)
GNAQ		enzyme	Activated	2.911	2.39e-15	ADAMTS1,ANXA3,ATF3,BMP4,CCND1,CLCF1,EDN2,EGR1,EMP1,FOS,FOSL1,GADD45A,HSPB8,IL1RN,INSIG1,LGALS3,MAFF,MYC,NFIL3,PGR,PLAT,PLAUR,PLCB1,PRKCD,Rnf125,SERPINE1,SOCS3,SPHK1,TNFAIP6,TNFRSF12A,TUBA1C,ZFP36L1	383 (22)
thapsigargin		chemical toxicant	Activated	3.865	3.04e-15	AR,ATF3,ATF5,BBC3,BCL6,CAPN5,CCND1,CD83,CDA,CDKN1A,CEBPB,CHAC1,COL18A1,DDIT3,EGR1,EGR2,EIF4EBP1,ESR1,FOS,GADD45A,GADD45B,HAPLN1,HDC,HMGCR,HMOX1,IER2,INSIG1,JUN,MAPK10,MMP9,MYC,NFIL3,PCK2,POLD4,PTPN6,RIPK1,SDC1,SERPINI1,SESN2,TGM2	323 (22)
Immunoglobulin		complex		0.3	3.66e-15	ACOD1,AHR,APLN,BCL2L11,BCL3,BCL6,BMP4,BMP7,C1QC,CCL4,CCND1,CCND2,CD274,CD300A,CD63,CD68,CD83,CD8A,CDK2,CEBPB,CH25H,Chil3/Chil4,CMPK2,COL1A2,COL3A1,COL4A1,COL4A2,COL6A3,COX6A2,CRABP2,CTSH,CYP4F8,DSP,DUSP1,EDNRB,EGR1,EGR2,EGR3,EOMES,ESR1,FBN1,FGF1,FOS,FOSB,GBE1,GBP6,GPNMB,HEY1,HLA-A,HMGA1,HMOX1,IFIT3,IL1RN,IL27,JUP,LGALS3,LILRB3,LPL,MAFF,MGST3,MMP19,MMP9,MTHFD2,Mx2,MYC,NFIL3,PCK2,PCOLCE,PDK4,PDLIM4…	437 (19)
25-hydroxycholesterol		chemical reagent	Activated	3.544	3.96e-15	ACAT2,ATF3,CCND1,CH25H,CHAC1,DDIT3,FDFT1,FOS,FOSB,FOSL1,FOSL2,GPX3,HMGCR,HMGCS1,HMOX1,INSIG1,JUN,JUNB,MAFF,MYC,SCD,STARD4,TRIB3	337 (16)
levodopa		chemical - endogenous mammalian	Inhibited	-2.144	5.41e-15	ARMH4,ARPP21,ASTN1,B3GALT5,BBC3,C4A/C4B,C9orf24,CCND1,CD63,CHAC1,CHST11,COCH,COL4A1,DUSP1,ECEL1,EDNRB,EGR2,FAM81A,FBLN1,FBLN2,FOS,FOSB,FOSL1,GABRA3,GABRG2,GADD45B,Gm14419 (includes others),GNAL,GSTM1,HAPLN4,HECW1,HLA-A,HS6ST2,HTR1B,ITPKA,JUNB,KCNC4,KCND2,KLF6,LAT2,LIX1,LMNA,LTBP1,MICAL1,MSMO1,MYO1B,NSG2,NTRK3,PCSK2,Pdzph1,PLPPR1,PPP2R2C,PVALB,Rab15,RASGRP1,ROBO2,S100A10,SCN4B,SH3GL2,SLC2A13,SPINK…	319 (21)
SRF		transcription regulator		1.482	8.99e-15	A2M,AKAP12,ATF3,BCL2L11,CALB1,CDKN1A,CLDN1,EGR1,EGR2,EGR3,ETV1,EZR,FGF1,FGF12,FLNA,FOS,FOSB,FOSL1,GADD45A,GADD45G,GCKR,GSN,GSTM5,HIF3A,HMOX1,HSPG2,IER2,Igkv1-117,JUN,JUNB,LPL,LTF,MAPK10,MMP9,MSTN,MYH9,MYO1B,NOX4,PDLIM7,RAB27B,S100A9,SEMA3A,SHH,SLC37A1,TNIP2,TNNT2,Tpm4,TST,ZYX	341 (19)
FSH		complex		-0.118	1.39e-14	ADAMTS1,ADCYAP1,ADGRG1,AHR,AKAP12,APLN,AR,BMPR1B,CCND1,CCND2,CDK14,CH25H,COL18A1,CYP11A1,DHH,DUSP1,ECEL1,ESR1,EZR,FLNC,FOS,FOSB,FOSL1,FOSL2,GRIN2A,IGFBP3,IL1RN,INHBB,ITGA3,ITGA5,JUN,JUNB,KITLG,KLF10,MMP9,MSMO1,MYC,PGR,PIK3CD,PLA1A,PLAT,PPP2R5B,PRLR,PTP4A1,PTPRN,RAB27A,RGS4,RPRM,SERPINE1,SNAP25,TNFAIP6,Tpm4,VGF	360 (22)
HDL-cholesterol		complex		-1.3	1.78e-14	ALDH1L2,CEBPB,CHAC1,CYP51A1,DDR2,EGR1,EIF4EBP1,FDFT1,FOSL2,HMGCS1,IDI1,MMP9,MSMO1,NUPR1,RASGRP1,TRIB3,TRIM66
MAPK1		kinase		0.819	2.29e-14	AKAP12,AR,ATF3,ATP1A2,ATP1B1,CCL4,CCND1,CDKN1A,CRABP2,CRYBG1,DLX3,DUSP1,EGR1,EGR2,EHD1,EMP1,ENDOD1,ESR1,FLNC,FOS,FOSB,FOSL2,HDC,HMOX1,IFI44,IFIT3,IGFBP7,IL1RN,ITGA5,JUN,JUNB,LAD1,LGALS3,LIF,LMNA,MMP9,MVP,MYC,NRN1,NUPR1,OLFML2A,PRSS12,PSAT1,RGS2,Serpina3g (includes others),SERPINE1,SLC27A2,SPP1,TNFRSF1B,TRPC1,ZC3HAV1	325 (18)
MRTFB		transcription regulator		1.747	2.46e-14	ADAMTS1,ALCAM,CDK2,COL3A1,COL4A5,COL6A3,DDAH1,DHCR24,EGR1,EGR2,EGR3,EZR,FIBIN,FLNA,FLRT2,GADD45A,GSTM5,HLA-A,Ifitm1,ITGA5,LMNA,LOXL1,LTF,MAFK,MYH9,P2RY1,PCDH18,PDGFRA,RAB27B,RUNX1,S100A9,SEMA3D,SERPINE1,Tpm4,TST	211 (7)
GLI1		transcription regulator		-0.469	2.49e-14	ADK,ATF3,BBC3,BCL2L11,BCL6,C11orf96,CCND1,CCND2,CDK2,CDKN1A,CMPK2,CSRNP1,CTTN,DIRAS2,EGR1,EGR3,EIF5A2,ELAVL2,EMB,EMP1,ENDOD1,EZR,FAM110C,FGF1,FOS,GADD45B,GLI2,GNAL,GREM2,IGFBP7,INSIG1,ITGA3,JUP,KITLG,KLF6,LAMB3,LIF,LMNA,MAFF,MIDN,MMP9,PAX2,PCDH18,PCDH7,PDGFRA,PDK4,PIM1,PLAUR,POLD4,PRAG1,RAB27B,RHEBL1,S100A9,SCD,SFRP1,SGPP2,SOCS1,SOCS3,SPP1,TNFRSF12A,TOM1,TRIM15	396 (22)
FOXO4		transcription regulator		0.295	3.18e-14	ANXA3,APLN,BCL2L11,BCL6,CCND1,CCND2,CDKN1A,CH25H,COL4A1,COL4A2,CYP51A1,DHCR24,EDNRB,ELOVL6,FDFT1,FMOD,GADD45A,GADD45B,GPX3,HMGCR,HMGCS1,IDI1,IGFBP7,MMP9,PRKCD,SCD,SERPINE1	351 (20)
SOX2		transcription regulator		1.325	3.64e-14	A930009A15Rik,ACOD1,AFAP1L2,AHR,ATF3,BMP4,BMPER,CALB2,CCND1,CD274,CDKN1A,CNKSR3,CRABP2,CYP26A1,DLX3,DNMT3B,DSP,DUSP1,ELOVL1,EOMES,FOS,FRZB,GADD45B,GBX2,GJA1,GLI2,GREB1,GSN,HEY1,JUN,KITLG,KLF6,MYD88,Nes,NOTCH3,OTX1,PAX2,PCDH18,PDGFRA,PHLDB1,POU4F1,PRKCD,PRKCQ,PSAT1,SEMA3D,SEMA6A,SERPINE1,SLC7A11,SPP1,SPRR1A,Sprr2g,TEAD2,TEAD3,TMEM163,TSPAN2,TUBB3,UGT8,WLS,ZIC2	379 (22)
bucladesine		chemical toxicant		1.767	4.11e-14	ADAMTS1,AR,CCND1,CD8A,CDKN1A,CEBPB,CLCF1,CYP11A1,DUSP1,EGR1,EGR2,ELAVL4,EOMES,FOS,FOSL1,FOSL2,GADD45B,GALNT14,GALNT16,GAP43,GJA1,GLUL,HMGCR,HMOX1,IGFBP3,INHBB,JAK3,JUN,JUNB,KITLG,LAMB3,LIF,MMP9,Mt1,MYC,NKD1,PDE4B,PDE5A,PDGFRA,PGR,RELA,RGS2,SERPINE1,Sik1,SNAP25,SOCS3,TINAGL1,VGF,WNT10A	441 (23)
SP600125		chemical drug	Inhibited	-3.652	6.52e-14	ACAT2,ATF3,BCL2L11,CCL4,CCND1,CD83,CDKN1A,CEBPB,CHAC1,COL4A1,COL4A2,CYP51A1,DDIT3,DSG2,DUSP1,EGR1,EMB,FGF1,FOS,FOSB,GADD45A,HMOX1,Hrk,IL1RN,IL27,ITGA3,JUN,JUNB,LAMA5,MMP9,MTHFD2,NUPR1,PCK2,PDGFRA,PGR,PIK3CD,RELA,RGS4,RUNX1,SCD,SERPINE1,SOCS3,SPHK1,SPP1,SQSTM1,TNNT2,TRIB3	420 (22)
cycloheximide		chemical reagent		1.327	8.13e-14	ADCYAP1,AHR,AR,CCL4,CCND1,CD8A,CDKN1A,CEBPB,COL1A2,CYP11A1,DUSP1,EGR1,ESR1,FOS,FOSB,FOSL2,GADD45A,GADD45B,GADD45G,GAP43,GJA1,GNAI1,GREB1,HMGA1,HMOX1,IL1RN,JUN,JUNB,KCND2,LPL,MMP19,Mt1,MYC,NFKBIE,OGN,PDGFRA,PGR,PLAT,PLAUR,PRKAR2B,RGS2,SCD,SERPINE1,SOCS3,SPP1,TNFAIP6,Tpm4,TRHR,TRPC1,VIP	414 (22)
POR		enzyme	Activated	2.783	8.51e-14	ACAT2,AHR,ATF5,CYP26A1,CYP39A1,CYP51A1,CYP7B1,DHCR24,ELOVL1,ELOVL6,FDFT1,FGF1,GADD45B,GREB1,GSTM1,GSTM5,HLA-A,HMGCR,HMGCS1,HMOX1,IDI1,Ifitm1,INSIG1,LPL,MAP3K6,MSMO1,Mt1,PDK4,SCD,STARD4,SUSD2,TUBB2B,ZMAT4	159 (5)
EGFR		kinase	Activated	2.816	9.35e-14	ACOT7,AR,BCL2L11,BCL6,CCND1,CD274,CD63,CDK2,CDKN1A,CEBPB,Chil3/Chil4,CLDN2,COL3A1,CRYBG1,DDIT3,DSG2,DUSP1,EGR1,EGR3,EHD1,ESR1,FBLN2,FBN1,FOS,FOSL1,FOSL2,GADD45A,GJA1,HDC,HMGA1,HSPB1,IER2,IGFBP3,JUN,JUNB,LAMB3,MATN2,MMP9,MYC,PDLIM7,PLAT,PLAUR,PPP1R1C,RELA,RHEBL1,RUNX1,SDC1,Serpina3g (includes others),SERPINE1,SFRP1,SLC7A1,SLC7A11,SLC7A5,SOCS3,SPHK1,ST3GAL4,STAT3,TGM2,TNFAIP6,TUBA4A,TUBB4A,UGT8,WNT…	418 (18)
IL2		cytokine	Activated	2.778	9.61e-14	AHR,ARHGEF2,ARHGEF3,ATF5,BBC3,BCL6,CAPN5,CCL4,CCND1,CCND2,CD274,CD83,CD8A,CDK2,CDKN1A,CRABP2,CRH,CSRNP1,CYP51A1,DHCR24,DSG2,DUSP1,ELMO3,EMP1,ENPP2,EOMES,FGF9,FOS,FOSB,FOSL2,GADD45B,GADD45G,HMGCR,HMGCS1,IDI1,IL1RN,INSIG1,JAK3,JUN,JUNB,KCNA2,KLF6,LAMA5,LIF,MAPKAPK3,MMP9,MTHFD2,MYC,NETO2,PDE4B,PDLIM4,PHGDH,PIM1,PLCB1,PSAT1,PTPN6,RGS2,RHOC,Serpina3g (includes others),SERPINE1,Sik1,SIPA1,SLC1A4,SLC3A2…	347 (19)
TP63		transcription regulator		1.195	1.01e-13	A2M,ACOD1,ADAMTS1,AHR,ALOXE3,BBC3,BCL2L11,BCL3,BCL6,BMP4,BMP7,CAST,CCND1,CCND2,CDK18,CDKN1A,COL4A1,COL4A2,COL6A3,DDAH1,EDN2,EGR1,EGR2,EMP1,FBN1,FOS,FOSB,FOSL1,FOSL2,GADD45A,GAL,GNAI1,GPNMB,HEY1,HSPG2,IGFBP3,IGFBP7,IL1RAP,ITGA3,ITGA7,JAK3,JUN,JUNB,KLF6,KRT6B,LAMB3,LIF,MAFF,MMP9,MYC,NOTCH3,POU3F2,RASGRP1,RASSF4,RELA,RIN1,RUNX1,SERPINE1,SERPINF1,SLC7A11,ST8SIA6,THY1,TINAGL1,TUBB2B	368 (22)
IgG		complex		-1.002	1.01e-13	ADGRG1,AHR,ATP1B1,BCL3,CCL4,CCND2,CD83,CDKN1A,CEBPB,COL3A1,CRABP2,DDIT3,DSP,DUSP1,EGR1,EGR2,EGR3,EHD1,EMP1,EZR,FOSB,FOSL2,GADD45B,HSPB1,IER2,IL1RN,JUNB,LGALS3,LIF,MMP9,MYC,NFKBIE,NOTCH3,PIM1,PLAUR,PLS3,PTPN6,RELA,SERPINE1,SERPINF1,STAB1,STAT3,SYNPO,TNFRSF1B,TSC22D3,VGF	385 (19)
CTNNB1		transcription regulator		1.869	1.01e-13	ACAT2,ADGRG2,AHR,ALCAM,AR,ARMH4,BBC3,BCL2L10,BCL2L11,BMP4,BMP7,CCL4,CCND1,CCND2,CD274,CDKN1A,CLDN2,COL3A1,COL4A1,COL4A2,COL4A5,COL4A6,CRABP2,CRYBG1,CYP11A1,CYP51A1,CYP7B1,DDIT3,EDIL3,EGR1,EHD1,ELMO1,ENPP2,EOMES,ETV1,FBLN2,FGF9,FOS,FOSL1,GADD45B,GADD45G,GAP43,GFPT2,GJA1,GLI2,GLUL,GPAT3,HAPLN1,HMGCR,HMGCS1,IDI1,INHBB,JUN,JUP,KITLG,LGALS3,LIF,LMNA,LPL,MMP9,MYC,Nes,NKD1,NOTCH3,NOTUM,NPTX1,OGN,PCDH9,P…	421 (21)
tetrodotoxin		chemical drug		0.528	1.1e-13	ATP1B1,CDH10,CNTNAP1,CPNE4,EGR1,ETV1,FRMPD4,GABRG2,GPR176,HDAC9,INA,INSIG1,KCNA2,KCND2,LGI1,Mt1,MTHFD2,NCAM2,NDST4,PDE4B,RCAN2,ROBO2,SORL1,STARD4,THSD7B,THY1,TRHDE,TRIQK,TSPAN2
DSCAM		other		0	1.22e-13	ATF5,CNTN1,CNTNAP1,ELMO1,GABBR2,GADD45G,GSN,JAK3,KCNA2,LIX1,MYC,NEFH,NOTCH3,PAX2,PLCB1,ROBO2,ROR2,SFRP1,SLC29A4,SYNPO,TUBA4A,TUBB3,TUBB4A,VGF
ethanol		chemical - endogenous mammalian		0.31	1.27e-13	ATF3,BMP4,CAPN5,CCND1,CDKN1A,CEBPB,CHRNA6,CHRNB3,CLIC4,COL1A2,COL3A1,CRH,CYP7B1,DDIT3,DDR2,DUSP1,EDNRB,EGR1,ESR1,ETNPPL,FOS,FOSB,FOSL1,FOSL2,GABRG2,GADD45A,GNAI1,GREM2,GRIN2A,HEY1,HLA-A,HMGCR,HMOX1,IFIT3,IL1RN,JUN,KLF6,MGST3,MLXIPL,MMP9,MYC,MYD88,NKD1,PLAT,RELA,SCD,SERPINE1,Sik1,SLC7A11,SRXN1,STAT3,TNFAIP6,TRIB3,TSC22D3,TTC3	447 (23)
OSM		cytokine	Activated	2.765	1.38e-13	A2M,ACOT2,ADAMTS1,AHR,ANXA2,ANXA3,ARHGEF2,ATF3,BCL3,CALB2,CCND1,CCND2,CDA,CDKN1A,CH25H,COL1A2,COL3A1,CTSH,DHCR24,EGR1,EIF4EBP1,EMP3,FOS,FOSB,FOSL1,GADD45G,GAP43,GLUL,GPNMB,GRIN2A,HLA-A,HMOX1,IGFBP3,JUN,JUNB,KLF10,LIF,LITAF,LMO1,MMP9,MYC,MYD88,NELL2,NOTCH3,OLFML2A,PLCD1,PTP4A1,RELA,RUNX1,S100A9,SBNO2,SEPTIN9,SERPINE1,SOCS1,SOCS3,SPP1,STAT3,SULT4A1,TOM1,USP46,VIP,ZC3HAV1	293 (17)
8-bromo-cAMP		chemical reagent	Activated	3.762	1.68e-13	BBC3,BMP4,BMP7,CCND1,CCND2,CD68,CDK2,CDKN1A,CEBPB,COL3A1,COL4A6,CRH,CYP11A1,DUSP1,EGR1,ESR1,EZR,FGF1,FGF9,FLNC,FOS,FOSL1,GJA1,GLUL,GNAI1,GPX3,GSN,INHBB,ITGA3,ITGA7,JUN,KITLG,LAMB3,LIF,LIMK1,LTBP1,MAPK10,MMP9,MYC,MYH9,Nes,NFIL3,NKD1,P4HA3,PCK2,PDE4B,PDGFRA,PGR,PLAT,PLCB1,PTGFR,RUNX1,SERPINE1,SFRP1,SHC2,SOCS1,SPP1,STAT3,SYNPO	479 (19)
UCP1		transporter	Activated	4.499	1.75e-13	ACOT2,ARHGAP33,ARHGEF2,ATF5,CD68,CPNE2,DDIT3,EIF4EBP1,EMB,GADD45A,GPX3,GREM2,GSTM1,IFIT3,MTHFD2,MYC,NUPR1,PCK2,PHGDH,PSAT1,PYCR1,SERPINE1,SHMT2,SLC3A2,Snhg12,STAP2,STBD1,TBC1D31,TPPP,TRIB3,TTLL7
ERBB2		kinase	Activated	2.14	1.77e-13	AKAP12,ANGPTL2,ANXA2,ANXA3,AR,ATF3,BCL3,BMP7,CCL4,CCND1,CCND2,CDKN1A,CDT1,CEBPB,CLEC4E,COL18A1,COL3A1,COL4A1,COL6A3,CRYBG1,CYP51A1,DDIT3,DHH,DSG2,DSP,EDN2,EGR1,EIF4EBP1,EMP1,EMP3,ESR1,ETV1,FBLN2,FGF9,FLNC,FOLR1,FOS,GBE1,GBP6,GFPT2,GJA1,GLUL,GNAI1,GPX3,HEY1,HMGCR,HSPB1,HSPB8,IDI1,IGFBP3,ITGA5,JUN,JUNB,JUP,LAD1,LAMB3,LGALS3,LITAF,Mir3473e,MMP9,MYC,MYO10,NOTCH3,NOX4,PCK2,PDK4,PDLIM4,PHGDH,PHLDB1,PIK…	429 (22)
kainic acid		chemical toxicant	Activated	3.976	2.23e-13	ATF3,BMP4,CALB2,CCND1,CEBPB,CSRNP1,DUSP1,EGR1,EGR2,EGR3,FGF9,FOS,FOSB,FOSL1,FOSL2,GADD45B,GAP43,GJA1,HDC,JUN,JUNB,KCNQ2,LMO1,MMP9,NFIL3,OPRL1,PLAT,PLAUR,RGS2,RGS4,SDC1,Sik1,SPP1	320 (19)
TFRC		transporter	Inhibited	-4.121	2.34e-13	ADGRG1,ANXA2,ATF3,ATF5,BBC3,BCL2L11,CD300A,CDKN1A,CHAC1,DDIT3,ECEL1,FOS,GADD45A,GPX3,HMOX1,Hrk,JUN,PHGDH,SOX11,SPRR1A,SRXN1,STC2,TNFRSF12A	272 (11)
thioacetamide		chemical toxicant	Activated	3.194	2.69e-13	ACOT2,ADAMTS1,AKAP12,ANXA2,C4A/C4B,CACNG5,COL1A2,COL3A1,EDNRB,EMP1,EMP3,FBLN5,FBN1,FOS,GPNMB,GPX3,HK1,Hrk,IFITM2,IGFBP3,ITGA7,JUN,LGALS3,LTBP1,MLXIPL,MYC,PCOLCE,PDGFRA,PLA1A,PRLR,PTGFRN,S100A10,SLC7A11,SPP1,SPRR1A,TES,TGM2,TNFRSF12A,VSNL1	398 (11)
NFkB (complex)		complex	Activated	3.271	2.9e-13	A2M,AHR,ATF3,BBC3,BCL3,CALB1,CCL4,CCND1,CCND2,CD274,CD83,CDKN1A,CEBPB,CFTR,CLCF1,CLEC4E,COL18A1,COL1A2,DDIT3,DOK5,EDNRB,EGR1,EOMES,FGF1,FOS,GADD45A,GADD45B,GAP43,GFPT2,GLI2,HDAC9,HIF3A,HLA-A,HMOX1,HSPB1,HTR1A,IL1RN,IL27,JUN,JUNB,KRT6B,LIF,LITAF,MMP9,MSTN,MYC,NFKBIE,PLAUR,PRKCD,RAB3C,RELA,RUNX1,SERPINE1,SHH,SLC7A1,SLC7A5,SOCS1,SOCS3,SOD3,SPP1,TGM2,TMOD2,TNFAIP6,TNFRSF4,TRIB3,VSNL1,WNT10A	431 (16)
AR	-0.808	ligand-dependent nuclear receptor		-0.084	3.63e-13	ADCYAP1,AR,BCL2L11,BMP4,C4A/C4B,CAST,CCND1,CDK14,CDKN1A,CDT1,CEBPB,Chil3/Chil4,COL3A1,CYP11A1,DAPL1,DERL3,DHCR24,DHH,DSG2,EDN2,EDNRB,EGR1,ELMO1,EMB,ESR1,ETV1,GADD45G,GJA1,GSN,GSTM1,HLA-A,HMGCR,HS6ST2,IGFBP3,INSL3,KCNJ3,KITLG,LAMA5,LIF,LRATD1,MMP9,MSMO1,MSTN,Mt3,MTHFD2,MYC,MYO1B,NUPR1,P2RX2,PCDH11X,PDGFRA,PDLIM4,PGR,PLAT,PLS3,PRKCD,RAB3C,SCEL,SERPINE1,Sik1,SLC3A2,SLC7A11,SMYD1,SOD3,SPP1,TEAD3,TNFR…	429 (21)
Lh		complex		1.324	3.64e-13	ADAMTS1,ADGRG1,AKAP12,AR,BCL6,CCND2,CDK14,COL18A1,CYP11A1,DUSP1,EGR1,EZR,FLNC,FOS,GADD45B,GADD45G,GJA1,HMGCR,INHBB,INSL3,ITGA3,JUN,JUNB,MMP19,MMP9,MSMO1,MYC,PGR,PIK3CD,PLAT,PPP2R5B,PTP4A1,PTPRN,RAB27A,RAPGEF3,RGS2,RGS4,RPRM,RUNX1,Sik1,SLC1A4,SLC7A1,SLC7A11,SNAP25,TNFAIP6,TNFRSF12A	511 (23)
APOE		transporter	Inhibited	-2.717	3.68e-13	ADGRG1,ATF3,BMP4,C1QC,CAMK1,CCL4,CCND1,CCND2,CD68,Chil3/Chil4,CHRNB3,COL18A1,DDIT3,EGR1,ESR1,FOS,GLUL,GPX3,HMGCR,HMOX1,HSPG2,IL1RN,ITGA3,ITGA5,JAK3,JUN,LPL,LTBP1,LTBR,MMP9,MYC,MYO1B,NEFH,NELL2,NMNAT2,NOX4,PCDH9,PCSK2,PRKCQ,PTP4A3,RELA,S100A9,SERPINE1,SOCS3,SPP1,STAT3,THY1,ZYX	381 (20)
G protein alpha i		group	Activated	2.656	4.61e-13	ADAMTS1,ATF3,C4A/C4B,CD274,FAM167A,FLNC,FOS,FOSL1,FOSL2,GBP6,GBP7,HLA-A,IFIT3,LIF,MAFF,RAB20,SOCS3,SPHK1,TAGLN2,TNFRSF12A,TUBB6	410 (22)
prostaglandin E2		chemical - endogenous mammalian		1.091	5.08e-13	ADAMTS1,AHR,ANXA2,ARHGEF3,ATF3,B3GALT5,BCL2L11,CALHM6,CCL4,CCND1,CD274,CD83,CDKN1A,CEBPB,Chil3/Chil4,DUSP1,EGR1,EGR2,FMOD,FOS,FOSB,FOSL1,FOSL2,GBP6,GJA1,HDC,HLA-A,HMOX1,IGFBP7,IL1RN,IL27,ITGA5,JAK3,JUN,LAD1,LMNA,MMP19,MMP9,MYC,NFIL3,PDE4B,RGS2,RIN1,SOCS3,SPHK1,SPP1,ST3GAL4,TNFAIP6,TSC22D3	362 (19)
HDAC1		transcription regulator		-1.361	6.35e-13	AKAP12,ALCAM,AR,ATF3,BBC3,BCL6,CCND1,CCND2,CDK2,CDKN1A,CDT1,COL1A2,DUSP1,EGR1,ESR1,FOS,GLUL,GRM1,INA,MMP9,Mt1,MYC,NEFH,Nefm,Nes,NKD1,OLFM4,PAX2,PRAG1,PTPN6,S100A9,SCN2A,SERPINE1,SFRP1,SOX11,SPP1,SQSTM1,STAT3,TGM2,TSC22D3,TUBB3	377 (22)
vancomycin		biologic drug	Activated	3.016	6.54e-13	A2M,ADAMTS1,ALCAM,ANXA2,BMP4,BMP7,C4A/C4B,CACNG5,CCND1,CD63,CMPK2,COL3A1,EFEMP2,EMP3,FOS,GPNMB,GRM1,HMOX1,JUNB,LGALS3,MYC,MYO1B,NIBAN2,NOX4,PLA1A,PRKCD,S100A10,SCD,SCOC,SOD3,SPP1,STAT3,SYNPO,TES,TNFRSF12A	384 (25)
Insulin		group	Activated	2.193	6.58e-13	APLN,ATF3,ATP1A2,CCL4,CCND1,CDK2,CDKN1A,CEBPB,COL18A1,COL1A2,COL3A1,COL4A1,COX6A2,CRABP2,CRH,CYP11A1,DDIT3,DUSP1,EGR1,EGR2,EIF4EBP1,ELOVL6,ENPP2,FBN1,FDFT1,FOS,FOSB,GABRG2,GFPT2,GREB1,HIF3A,HMGCR,HMGCS1,HMOX1,IFIT3,IGFBP3,INSIG1,ITGA3,JUN,JUNB,KCNJ3,LDHB,LPL,MLXIPL,MMP9,Mt1,MYC,NFIL3,NOTCH3,NR1H4,PDGFRA,PDK4,PGR,PLAT,PLCB1,PRKCD,PRKCQ,PRLR,PTGFRN,PTPRN,SCD,SERPINE1,SERPINF1,SLC7A1,SNAP25,SOCS3,ST…	457 (24)
F2		peptidase	Activated	4.758	6.84e-13	BCL3,CCND1,CCND2,CD63,CD68,CDC42EP1,CDKN1A,CLIC1,COL4A1,DOK5,DUSP1,EDNRB,EGR1,FOS,FOSB,FOSL1,FOSL2,HDAC9,HMGA1,HMOX1,IER2,JUN,JUNB,KLF6,MMP9,MYC,MYH9,PDGFRA,PGR,PLAT,PLAUR,RELA,RHOJ,SERPINE1,SLC7A1,TAGLN2,TNFRSF12A,TNNT2,TRPC1,TUBB3	422 (18)
SP1		transcription regulator		1.591	7.34e-13	ACVRL1,ADAMTS1,AKAP12,AR,ATF3,BACE2,BBC3,BMP4,BMP7,CCND1,CCND2,CDK2,CDKN1A,CEBPB,CHRNB4,COL1A2,CPLX1,CRABP2,CYP11A1,CYP26A1,CYP51A1,CYP7B1,DHCR24,DLX3,EGR1,ESR1,EZR,FLNA,FOS,FOSL1,GJA1,GRM1,HDC,HMGA1,HMGCR,HMOX1,IGFBP3,JUN,KCNQ2,KLF6,LPL,MMP9,Mt1,MYC,NOX4,PDGFRA,PGR,PIM1,PLAUR,PRKAR2B,PRKCD,PRLR,RASGRP2,RELA,SERPINE1,SLC11A1,SLC7A1,SNAP25,SNCG,SOCS1,SPP1,STAT3,TNFRSF4	427 (23)
cisplatin		chemical drug	Activated	4.716	7.95e-13	A2M,ADAMTS1,ANXA2,ATF3,BBC3,BCL2L10,BCL2L11,BMP4,C11orf96,C4A/C4B,CACNG5,CCL28,CCND1,CD68,CDKN1A,CLDN19,CYP26A1,DDIT3,DUSP1,EFEMP2,EGR1,EMP3,ESR1,FADS3,FOS,FOSL1,GADD45A,GAP43,GPNMB,GRIN2A,GSTM1,HDAC9,HIC1,HK1,HMGCR,HMGCS1,HMOX1,IGFBP3,ITGA7,JUN,LAMB3,LDHB,LGALS3,LMNA,Mt1,MYC,NEFL,NOTCH3,NOX4,NR1H4,OLFM4,PCDH20,PDK4,PHGDH,PHLDA3,PLA1A,PLAT,RAB27B,RAB6A,RELA,RUNX1,S100A10,S100A9,SCN4B,Serpina3g (i…	383 (18)
STK11		kinase	Activated	2.614	8.13e-13	A2M,ALCAM,ASTN1,ATF3,AVIL,BCL2L11,CCND1,CD274,CDKN1A,CNTN1,COL3A1,CYP4F8,FOSL1,GADD45A,GADD45B,IL1RAP,JUNB,KCNA2,KCNQ2,KITLG,KLHL29,MAFK,MMP9,Mt3,MYC,NCAM2,PCK2,PHGDH,POLA2,POLD4,PSAT1,PTPRN,PYCR1,RASGRP1,SERPINE1,SERPINI1,SHH,SHMT2,SORL1,SPP1,TNFRSF4,TRIB3	364 (21)
medroxyprogesterone acetate		chemical drug	Activated	3.934	8.52e-13	ADAMTS1,BBC3,BCL2L11,BMP4,C9orf24,CCL4,CCND1,CCND2,CD68,CDK2,CDKN1A,CLDN1,COL3A1,COL4A6,DNMT3B,ENPP2,ESR1,EZR,FGF1,FGF9,FLNC,FMOD,FOSL1,GLUL,GPX3,GSN,IGFBP7,ITGA3,ITGA7,JUN,JUNB,LAMB3,LIF,LIMK1,LMNA,LTBP1,MAPK10,MYC,MYH9,NKD1,OMG,P4HA3,PCK2,PDGFRA,PGR,PLCB1,RUNX1,SCD,SERPINE1,SFRP1,SHC2,SOCS1,SPC25,STAT3,TRIM55	471 (20)
SMAD3		transcription regulator	Activated	4.519	8.9e-13	ACVR1C,ADAMTS1,ADORA1,BCL2L11,CCL4,CCND1,CCND2,CD79A,CDKN1A,COL1A2,COL3A1,COL4A1,COL4A2,COL6A3,CYP11A1,CYP51A1,DDIT3,EGR1,ESR1,FBN1,FBN2,FDFT1,FOS,GADD45B,GLI2,HEY1,HMOX1,JUN,JUNB,MMP19,MMP9,MSTN,MYC,NOX4,PCOLCE,PTP4A3,RELA,SCD,SERPINE1,SPHK1,SPP1,STAT3,VIP,ZYX	405 (22)
AHR	0.426	ligand-dependent nuclear receptor	Inhibited	-2.039	1.12e-12	A2M,ATP1B1,C1QC,CAPN5,CCND1,CD274,CD8A,CDK2,CDKN1A,COL1A2,COL3A1,COL4A1,COL4A2,COL6A3,CYP2S1,EBF1,EGR2,EHD1,ESR1,FADS3,FBLN2,FBLN5,FBN1,FBN2,FGF9,FOS,FOSL1,GADD45A,GSTM5,HDAC9,HMGCR,ITGA5,ITGA7,JUN,JUNB,LAMA5,LTBP1,MATN2,Mt1,MYC,NID2,NOTCH3,NPTX1,PDE4B,PDGFRA,PLAT,PRKCQ,RASGRP1,SCD,SDC1,SEMA3A,SERPINE1,SLC1A4,SOCS3,SPP1,STAT3	438 (19)
GRIN3A	-0.498	ion channel	Activated	4.2	1.2e-12	CDH10,CNTNAP1,CPNE4,ETV1,FRMPD4,GABRG2,GPR176,HDAC9,INSIG1,KCND2,LGI1,Mt1,MTHFD2,NCAM2,NDST4,PDE4B,RCAN2,ROBO2,SORL1,STARD4,THSD7B,THY1,TRHDE,TRIQK,TSPAN2
L-triiodothyronine		chemical - endogenous mammalian		-0.08	1.22e-12	A2M,ACAT2,ACOT2,AR,ATP1B1,BBC3,BCL2L11,BCL3,BMP4,C4A/C4B,CCND1,CDK2,CDKN1A,COL4A1,CTSH,CYP11A1,CYP51A1,DHCR24,DNMT3B,DUSP1,EGR1,EGR2,ENPP2,ESR1,FOS,FUOM,GLI2,HMGCR,HMGCS1,IDI1,IGFBP3,ITGA7,LGALS3,LMNA,MGST3,MLXIPL,MMP9,MSMO1,MYC,PCK2,PCSK2,PDK4,PGR,PLEKHG2,PRKCQ,PSAT1,RASD2,RASGRP1,RCAN2,RGS2,SCD,SERPINE1,SHH,SLC25A45,ST3GAL4,SYNPO,TGM2,TRHDE,TRHR,VGF	415 (23)
PRL		cytokine	Activated	2.395	1.25e-12	A2M,ANXA2,ANXA3,BCL6,CAMK1,CCND1,CDKN1A,CMPK2,COL1A2,COL3A1,CRH,CTSH,CYP11A1,EGR1,ESR1,FOS,GPNMB,GSTM1,IFI44,IFIT3,IGFBP3,JUN,LIF,MYC,NUPR1,PCOLCE,PDGFRA,PDK4,PDLIM4,PIM1,PLAT,PLCD1,PRLR,PTGFR,SDC1,SOCS1,SOCS3,SPP1,STAT3,STC2,TNFRSF12A,TSC22D3,ZYX	401 (23)
camptothecin		chemical drug	Activated	3.334	1.4e-12	ANXA2,APBB2,AR,ATF3,BAG3,BBC3,CAST,CCND1,CD83,CDK2,CDKN1A,CHAC1,CHST11,CRYBG1,EGR2,F5,FOS,FOSB,GADD45A,GADD45B,GADD45G,GBX2,GPNMB,HLA-A,HSPB1,HSPB8,IGFBP3,IL1RAP,INSIG1,ITGA7,JUN,LGALS3,LIMK1,LITAF,MAFF,MARCKSL1,MMP9,Mt1,MYC,MYO10,NFKBIE,OLFM4,PDLIM7,PIK3CD,PPP1CC,PRKAR2B,PTP4A1,PTPRN,PVALB,RASGRP2,RIPK1,ROR2,SDC1,SERPINE1,SIPA1,SOCS1,SORL1,SPP1,STC2,TAGLN2,TBC1D31,TNFAIP6,TNFRSF1B,TUBA4A,ZFP36L1	360 (16)
diethylstilbestrol		chemical drug		0.528	1.57e-12	ADM2,AHR,AR,BCL6,CCND1,CD83,CDKN1A,CLSTN2,CRABP2,CTTN,DNMT3B,EGR1,EMP1,ESR1,FBLN1,FMOD,FOS,FRZB,GADD45A,GAL,GAP43,GREB1,HDC,HELLS,HIC1,HLA-A,IGFBP3,Igkv1-117,INHBB,INSL3,LTF,Muc1,OLFML2A,PCOLCE,PDGFRA,PGR,PIM1,RESP18,RGS4,RUNX1,SCN7A,VIP	462 (23)
H89		chemical drug		-0.192	1.7e-12	BMP4,CCND1,CD83,CDKN1A,CEBPB,CLCF1,CRH,DUSP1,EGR1,EGR2,EGR3,ESR1,FOS,GJA1,HAPLN1,HMOX1,JUN,JUNB,MMP9,MYC,NFIL3,PCSK2,PGR,PPP1R16B,RELA,RUNX1,SDC1,SERPINE1,SNAP25,TNFAIP6	390 (22)
TGFBR2		kinase		-0.169	1.88e-12	ACOD1,AR,ATP1A2,BACE2,BCL3,CCDC184,CCL4,CCND1,CD83,CDKN1A,CHRNB4,CLIC4,COL1A2,COL4A6,DSG2,EGR1,EGR2,FGF9,FMOD,GADD45B,GADD45G,GAL,GJA1,GLI2,HDC,HSPB1,IL1RAP,JAK3,JUN,JUP,MMP9,NFIL3,NFKBIE,POU4F1,S100A9,SCN7A,SDC1,Serpina3g (includes others),SERPINE1,SH3BP2,SLC7A5,SOCS3,SPP1,STAT3,STC2,STK32C,TNFRSF12A,TNFRSF4,WNT10A	435 (17)
CSF1		cytokine		0.903	2.18e-12	BCL2L11,CCND1,CCND2,CD68,CD83,CDK2,CDKN1A,Chil3/Chil4,CTSH,CYP11A1,CYP51A1,DHCR24,DUSP1,EGR1,EGR2,EGR3,FDFT1,FOS,GPNMB,HLA-A,HMGCR,HMGCS1,IDI1,IL27,ITGA5,JUN,JUNB,LPL,MMP9,MSMO1,MYC,PGR,RIPK1,RUNX1,SFRP1,SLC7A5,SLFN12L,SOCS1,SPP1,STAB1,TNFRSF1B	384 (19)
AGN194204		chemical drug	Activated	3.452	2.2e-12	ACAT2,AHR,ANXA2,ATF3,CCL4,CDKN1A,CLIC4,CRABP2,CRYBG1,CYP51A1,CYP7B1,DUSP1,EMP1,EMP3,FDFT1,GADD45A,GJA1,GNAI1,HIC1,IDI1,KLF6,LMNA,LPL,MMP9,MYC,NDST4,PALM3,PDK4,PIM1,RCAN2,SCD,SH2D3C,SLC3A2,SPP1,SYNPO	367 (18)
topotecan		chemical drug		-0.617	2.36e-12	ACOT2,AKAP12,ATF3,BCL3,C4A/C4B,CCL4,CD83,CDKN1A,CNTN1,CNTN4,DPP10,EFNB1,EGR1,EGR3,EMB,FOS,FOSB,FRMPD4,GADD45B,IFIT3,JAK3,JUN,JUNB,LRRC7,MARCKSL1,MYC,NECTIN3,OAF,PCDH9,PDE4B,PIK3CD,PLCB1,PPP1R16B,PRKAR2B,PRKCQ,RBPMS,RELA,RIPK1,ROBO2,SESN2,SLC7A5,SOCS1,SOCS3,TNFRSF1B,TST	347 (15)
FOXO3		transcription regulator		0.577	2.6e-12	AHR,ANXA3,APLN,AR,BBC3,BCL2L11,BCL6,CCND1,CCND2,CDKN1A,CDT1,CH25H,CLDN1,COL4A1,COL4A2,DDIT3,DOK5,EDNRB,EGR1,EGR2,EIF4EBP1,ESR1,FMOD,FOS,FOSB,GADD45A,GADD45B,GLUL,GPX3,GSTM5,HMGCR,IGFBP7,JUNB,MMP9,MSTN,Mt1,MTHFD2,MYC,NUPR1,PRKCD,RELA,SERPINE1,SLC1A4,SLC7A1,TNFRSF1B	371 (19)
CEBPA		transcription regulator		0.102	2.92e-12	A2M,ACOD1,AKAP12,APLN,CCL4,CCND1,CCND2,CDKN1A,CEBPB,COL1A2,CRABP2,CYP11A1,DLX3,EBF1,EGR2,FOS,GADD45A,GAL,GBX2,GJA1,GPR84,HMGA1,HMGCR,HMOX1,IGFBP3,IL1RN,JUN,JUNB,LITAF,LPL,LTF,MYC,NFIL3,NR1H4,PAX2,PIK3CD,PLXND1,PRLR,PTGFR,RGS2,RIN1,S100A9,SCD,SERPINE1,SERPINF1,SERPINI1,SOCS3,SPP1,SPRR1A,TNFAIP6,TSC22D3,ZIC2	353 (21)
progesterone		chemical - endogenous mammalian	Activated	2.257	3.92e-12	ACOD1,ACOT7,ADAMTS1,ADCYAP1,AR,ARID5A,ATF3,ATP1A2,ATP1B1,BCL6,CCND1,CDK2,CDKN1A,CDT1,CEBPB,CFTR,Chil3/Chil4,CRH,CYP26A1,DDIT3,EGR1,ENPP2,ESR1,EZR,FOS,FOSL1,GAL,GAP43,GJA1,GREB1,HDC,HELLS,HEY1,HLA-A,HMGCR,IGFBP3,IL27,ITGA5,JUN,KLF10,LAMB3,LGALS3,LIF,LITAF,LPL,LTF,MDK,MMP9,Muc1,MYC,MYD88,MYO10,NFIL3,NOTCH3,NUPR1,OSGIN1,PGR,PRLR,RAB27B,SCD,SOCS1,SPHK1,SPP1,ST3GAL4,STAT3,TNFRSF1B,TRPC1	383 (21)
tetrachlorodibenzodioxin		chemical toxicant		0.713	4.3e-12	ACOD1,ACOT2,ACOT7,AHR,ALCAM,AR,BMP4,CALB1,CALN1,CCND1,CD274,CDK2,CDKN1A,CEBPB,CFTR,COL18A1,COL4A5,CYP11A1,CYP2S1,EBF1,EMP3,ESR1,F5,FGF9,FOS,GADD45B,GLI2,HDAC9,HMOX1,INA,ITGA5,ITGA7,JUN,KCNJ5,MYC,MYO10,NAT2,NPTX1,PCDH18,PCSK2,PDE4B,PGR,PLAUR,PRKAR2B,PTGFR,RELA,RESP18,S100A9,SDC1,SEMA3C,SERPINE1,SH3BGRL2,SLC7A5,SPP1,STC2,TSC22D3	427 (22)
SOD1		enzyme		-1	5.23e-12	ATP1A2,BAG3,BMP4,CACNB4,CAST,CCND1,EZR,FOS,FOSL2,GNG4,GPX3,GSTM1,GSTM5,HMOX1,HSPB1,HSPB8,IFI44,JUN,JUNB,KCNC4,KCND2,LIMK1,LPL,MMP9,Mt1,Mt3,NEFH,NEFL,Nefm,NETO2,NFIL3,PRPH,SCN2B,SNCG,SPP1,SQSTM1,TUBB4A,VGF,VIP	457 (22)
MAP2K1		kinase	Activated	2.874	5.24e-12	ADGRG1,AHR,ATF3,BCL2L11,CCL4,CCND1,CD274,CDK2,CDKN1A,CLDN2,COL1A2,COL3A1,CYP11A1,DUSP1,EGR2,FLNA,FOS,FOSL1,GLI2,HDC,ITGA5,JUN,JUP,LGALS3,MMP9,MYC,OLFM4,PDGFRA,PIM1,PLAUR,RAB38,TGM2	421 (20)
KLF6	0.485	transcription regulator	Activated	3.605	8.07e-12	ACVRL1,AHR,ATF3,BCL2L11,BCL3,BCL6,CD274,CD83,CDKN1A,CEBPB,Chil3/Chil4,CLCF1,EGR2,EHD1,GADD45B,GFPT2,HMOX1,ITGA5,JUNB,KLF10,LGALS3,LITAF,MMP9,MVP,MYC,MYD88,NFKBIE,PDE4B,PIM1,PLAT,SDC1,SHH,SOCS1,SOCS3,SQSTM1,STAT3,TNFRSF1B,TNIP2	343 (19)
INSR		kinase		-1.812	8.76e-12	ACOT2,ARHGEF2,ATF3,ATP1B1,BMP4,CCL4,CCND1,CCND2,CD83,CDKN1A,COL6A3,COX6A2,CRABP2,CYP11A1,CYP51A1,DDR2,DNMT3B,DUSP1,EGR1,EGR2,EOMES,FBLN1,FDFT1,FLNC,FOS,GADD45A,GBX2,HELLS,HMGCR,HMGCS1,HOXB9,IDI1,IER2,IFITM2,INSIG1,ITGA5,JUNB,KIFAP3,KLF10,LAT2,MARCKSL1,MMP9,MSMO1,MYC,OGN,PAX2,PDE4B,PDK4,PIM1,PRKCQ,PTPRN,SCD,SEMA3A,SERPINE1,SOCS3,ST8SIA2,TEAD2,TUBB3	405 (23)
NR3C1		ligand-dependent nuclear receptor		-1.377	8.79e-12	A2M,AIFM3,ARHGEF3,ATP1B1,BAG3,BCL2L11,BCL6,C4A/C4B,CCL4,CCND1,CD274,CD83,CDKN1A,CEBPB,CLCF1,COL1A2,COL3A1,CRABP2,CRH,CSRNP1,CYP11A1,DUSP1,EDN2,EGR1,EMP1,FASTKD2,FOS,GADD45A,GADD45B,GAP43,GLUL,GPX3,GRIN2A,GRM1,HTR1A,IER2,IL1RAP,JUN,LAD1,LIF,MMP9,Mt1,MYC,MYD88,NFIL3,PCK2,PDE4B,PIK3CD,PLAT,PPP1R14C,PRKCD,PRLR,PRPH,RAPGEF4,RELA,RGS2,RIPK1,S100A9,SEMA3C,SERPINE1,SPP1,STAT3,SUMO2,SYT2,TNFAIP6,TNFRSF12A…	420 (16)
NRG1		growth factor	Activated	3.676	9.02e-12	AR,ARHGEF2,CCND1,CCND2,CDC42EP1,CDKN1A,COL6A3,DDAH1,DDIT3,DUSP1,EGR1,EGR2,EGR3,FGF1,FLNA,FOS,FOSB,FOSL1,GPX3,HMGA1,HMGCR,HMOX1,IDI1,IER2,INSL3,JUN,JUNB,MMP9,MYC,PGR,PHGDH,PLAUR,RUNX1,SERPINE1,TGM2,TNNT2,UCN,VIP	366 (19)
calcitriol		chemical drug		-0.084	9.06e-12	ACAT2,AFAP1L2,AHR,AKAP12,ANXA2,AR,ARHGEF3,B3GALT5,BCL3,BMP7,CALB1,CCND1,CCND2,CDKN1A,CDT1,CEBPB,CNNM1,COL1A2,COL3A1,COL4A1,COL4A2,DDAH1,DHCR24,DOK5,DUSP1,EGR1,ESR1,EXPH5,FBN1,FBN2,FOS,GADD45A,GADD45G,GSTM5,HELLS,IGFBP3,IL1RN,JUN,JUNB,LPL,LTBP1,LTF,MYC,MYD88,NFKBIE,NOX4,NPTX1,NUPR1,OLFML2A,PDK4,PGR,PHGDH,PRKCD,PTGFR,PTPRR,PYCR1,RAB38,RBPMS,RELA,RUNX1T1,S100A9,SOCS3,SPP1,STAT3,TAGLN2,THEM4,TINAGL1	354 (23)
hydrogen peroxide		chemical - endogenous mammalian	Activated	3.394	1.09e-11	ACAT2,ANXA2,AR,ATF3,BBC3,BCL2L10,BCL2L11,CCL4,CCND1,CD63,CD68,CDK2,CDKN1A,COL1A2,COL3A1,CYP51A1,DDIT3,DUSP1,DUSP8,EGR1,ENPP2,EZR,FDFT1,FOS,FOSL1,GADD45A,GADD45B,GFPT2,HDC,HELLS,HMGCR,HMOX1,INSIG1,ITGA3,JUN,KITLG,MDK,MMP9,MSMO1,MYC,NFIL3,NOTCH3,OSGIN1,PDGFRA,PIM1,PLAUR,RAB27A,RELA,RIPK1,ROR2,SERPINE1,SHH,SLC7A11,SPP1,STAT3,TGM2,TRIB3,TUBA4A	397 (21)
CHUK		kinase		1.543	1.2e-11	ACOD1,ATF3,CCL4,CCND1,CDKN1A,CEBPB,CH25H,CLDN1,COL18A1,CYP7B1,ENPP2,FOS,GADD45B,GRIN2A,HEY1,HLA-A,HMOX1,IL1RN,JUNB,KLF10,MMP9,Mt1,MYC,OGN,PCDH7,RELA,SEMA3C,SFRP1,SOCS3,SOD3,SPP1,SQSTM1,TNFRSF1B	356 (13)
Interferon alpha		group	Activated	3.48	1.49e-11	ADAMTS1,ANXA2,ANXA3,ATF3,BBC3,BCL3,BCL6,BMP4,CCND1,CCND2,CD274,CD83,CD8A,CDKN1A,CH25H,COL1A2,EIF4EBP1,ENPP2,FBLN2,FOS,FOSL2,GBP6,HLA-A,HMOX1,Hrk,IFI44,IFIT3,IFITM2,IL1RN,IL27,LGALS3,LIF,LOXL1,LTBP1,MARCKSL1,MTHFD2,MYC,MYD88,NFIL3,PARVG,PIM1,PLAT,PLAUR,PTPN6,RELA,RIPK1,S100A9,SHH,SHTN1,SLFN12L,SOCS1,SOCS3,STAP2,STAT3,STC2,TGM2,Tpm4,TUBB6,ZC3HAV1	385 (16)
paclitaxel		chemical drug		1.119	1.76e-11	AR,ARHGEF2,ATF3,BCL2L11,CCND1,CD274,CDA,CDK18,CDK2,CDKN1A,DDAH1,DDIT3,EGR1,EMP1,ENPP2,ETV1,FLNA,FOLR1,FOSL1,GADD45B,GFPT2,HLA-A,HTR1A,IER2,IGFBP3,IL1RAP,ITGA3,ITGA5,ITPKC,JUN,LGALS3,MMP9,MYC,NEFH,PHGDH,PLAUR,S100A9,STAT3,TOM1,TUBA4A,ZIC2	376 (18)
Ige		complex	Activated	4.067	1.83e-11	BCL2L11,BCL3,BCL6,CCL4,CCND2,CDKN1A,CHST11,CLCF1,CLEC4E,CMPK2,COL18A1,EGR1,EGR2,ELMO1,GADD45B,GSN,HDC,HMOX1,ITGA5,JUNB,LAMA5,LIF,MAPKAPK3,MARCKSL1,MYC,NFKBIE,PIK3CD,PTPN6,RASGRP1,RFX2,Rnf125,RUNX1,SCD,SLC11A1,SOCS1,SOCS3,SPHK1,SPP1,TNFRSF12A,TNFRSF1B,TPPP3,TUBB6	327 (16)
IL6ST		transmembrane receptor		1.073	1.89e-11	A2M,CCND1,CLDN2,ECEL1,EGR1,ENPP2,JUN,JUNB,LTF,Muc1,MYC,PIM1,SERPINE1,SOCS1,SOCS3,SPRR1A,STAT3,TNFRSF1B,VIP	273 (19)
L-glutamic acid		chemical - endogenous mammalian		1.225	2e-11	BAG3,BCL2L11,CALB1,CCND1,CDKN1A,CLDN1,DHCR24,EGR1,FDFT1,FOS,FOSB,GADD45B,GRIN2A,HMGCR,HMGCS1,IDI1,INSIG1,JUN,JUNB,LIF,MMP9,MSMO1,NFIL3,RELA,SCD,SORL1	430 (26)
DSCAML1		other		-0.218	2.15e-11	ARHGAP33,CNTN1,CNTNAP1,GABBR2,GADD45G,JAK3,KCNA2,LGI1,MYC,NEFH,NOTCH3,NRN1,PAX2,PLCB1,ROBO2,SFRP1,SLC29A4,TUBA4A,TUBB3,TUBB4A,VGF
isobutylmethylxanthine		chemical toxicant		-0.438	2.27e-11	APLN,CCND1,CDK2,CDKN1A,CEBPB,COL1A2,COL3A1,CRABP2,CRH,CRHBP,CYP11A1,EGR1,EGR2,ELOVL6,FOS,IFIT3,ITGA3,JUN,JUNB,LPL,Mt1,MYC,NOTCH3,PDGFRA,PDK4,PGR,PLAT,PRLR,PTGFRN,PTPRN,SCD,SERPINE1,TRHR	342 (21)
RAF1		kinase	Activated	2.617	2.27e-11	ACAT2,ACOT7,AKAP12,BCL2L11,BCL6,CCND1,CDC42EP1,CDKN1A,CHN1,CLDN1,CTSH,EGR1,EGR3,EMP1,EMP3,ESR1,FOS,HDC,HSPB1,IER2,IGFBP3,JUN,LAD1,LIF,MMP9,MYC,PLAT,PLAUR,SDC1,SH2D1A,ST3GAL4,TGM2,TUBA4A	366 (19)
TNFSF11		cytokine	Activated	3.56	2.41e-11	ACOD1,AHR,BMP4,CCL4,CCND1,CD83,CDK14,CDKN1A,CLEC4E,DUSP1,EGR2,EHD1,ESR1,FOS,FOSL1,GADD45B,HMOX1,IL1RN,ITGA5,JUN,JUNB,LIMK1,MARCKSL1,MMP9,MYC,NFIL3,NFKBIE,PCDH7,PHLDA3,PIM1,PLAUR,SDC1,SERPINE1,SOCS1,SOCS3,SPP1,SRXN1,TNFRSF1B	378 (14)
tosedostat		chemical drug	Activated	2.894	2.44e-11	ATF3,ATF5,CDKN1A,CEBPB,CHAC1,DDIT3,GADD45A,PSAT1,SDC1,SESN2,SLC7A11,STC2,TRIB3
dihydrotestosterone		chemical - endogenous mammalian		0.638	2.63e-11	ADAMTS1,ADCYAP1,AR,BMP7,BMPR1B,C4A/C4B,CCND1,CCND2,CCNO,CD63,CDK2,CDKN1A,Chil3/Chil4,COL3A1,COL4A1,COL5A3,CYP11A1,DHCR24,EGR1,EIF4EBP1,ESR1,ETV1,FOS,GAP43,GLUL,GPX3,GREB1,GSN,HLA-A,HMGCR,HSPB1,IGFBP3,IGFBP7,INHBB,INSL3,IRX2,JUN,KITLG,LAMA5,LPL,LTBP1,MAFF,MLXIPL,MMP9,MSTN,Mt1,MYC,NIBAN2,NID2,PHGDH,PRLR,RAB27A,RELA,RUNX1,SCD,SLC1A4,SLC25A37,SLC3A2,SOD3,SPP1,STBD1,TGM2,UCN	472 (21)
SB-431542		chemical reagent	Inhibited	-2.818	2.88e-11	ATP1A2,BMP4,CCND1,CLIC4,COL3A1,COL4A1,DHCR24,EOMES,FBN1,FOS,GADD45B,GAL,GJA1,HMGCS1,IDI1,IGFBP7,IL1RAP,MRC2,MYC,PCOLCE,SCD,SCN7A,SERPINE1,SPP1,STAT3,TNFAIP6,TNFRSF12A	386 (22)
PI3K (complex)		complex	Activated	2.316	2.89e-11	APLN,ATF3,BBC3,BCL2L11,CCL4,CCND1,CCND2,CD274,CDKN1A,CEBPB,DDIT3,DUSP1,FBLN5,FOS,FOSL1,GAP43,GJA1,GLI2,GSTM5,HK1,HMGCR,HMOX1,IL1RN,JUN,MMP9,MTHFD2,MYC,NOX4,PIM1,PRKAR2B,RELA,RGS2,SERPINE1,SNCG,SOCS3,SPP1,TGM2,TUBB3,VIP	384 (19)
IL6		cytokine	Activated	4.717	3.85e-11	A2M,ACVRL1,ADAMTS1,AHR,AR,ATF3,BBC3,BCL2L11,BCL3,BCL6,CCL4,CCND1,CD274,CD68,CD79A,CD83,CDK2,CDKN1A,CEBPB,Chil3/Chil4,CHRNB4,CLDN2,CLEC4E,COL3A1,CRH,DUSP1,EGR1,EGR2,ELAVL4,ENPP2,EOMES,FOS,FOSL1,GADD45A,GADD45B,GADD45G,GAL,GAP43,HLA-A,HMOX1,IGFBP3,IL1RN,JUN,JUNB,LIF,LPL,LTF,MMP9,Mt1,MYC,MYD88,NKD1,NR1H4,PIM1,PLAT,PRPH,PTGFR,PTP4A3,RAB27A,S100A9,SBNO2,SERPINE1,SHH,SOCS1,SOCS3,SPC25,SPP1,STAP2,STAT3,…	367 (15)
ADRB		group		-0.381	3.89e-11	ACAT2,ARHGEF3,ATF3,ATF5,CCND1,CD68,CDKN1A,CLEC4D,CYP51A1,DDIT3,ENDOD1,FAM110C,FOS,GADD45A,HMGCS1,HMOX1,IFIT3,INSIG1,JUN,JUNB,LTBP1,MMP9,MSMO1,SLC7A11,SQSTM1,SRXN1	363 (19)
LIF	2.37	cytokine	Activated	3.123	4.21e-11	A2M,BCL3,BMP7,CCND1,CDKN1A,CEBPB,COCH,CYP11A1,CYP26A1,ECEL1,EGR1,ENPP2,FOS,GAL,GLUL,HEY1,JUN,JUNB,KLF10,LPL,MT-ATP6,MYC,Nes,PGR,PIM1,PRPH,RGS4,SOCS1,SOCS3,SPP1,SPRR1A,STAT3,VIP	234 (18)
anisomycin		chemical - endogenous non-mammalian		1.797	4.69e-11	AHR,ATF3,CCND1,CDKN1A,DUSP1,DUSP8,EGR1,FOS,GJA1,HMGA1,JUN,JUNB,PLAUR,SDC1,SERPINE1,SPP1,VIP	308 (17)
RASSF1		other		0.563	5.21e-11	CCND1,CCND2,CDKN1A,COL4A1,COL4A2,CRABP2,EGR1,EMP1,ESR1,FOS,GSN,IGFBP3,KLF10,LIF,LITAF,MDK,MYC,PCDH7,SPP1,TGM2,TUBB2B	355 (19)
KLF4		transcription regulator	Activated	2.332	5.64e-11	ACOD1,ADAMTS1,ALCAM,BMPER,CCL28,CCND1,CCND2,CDKN1A,Chil3/Chil4,CLIC4,CRABP2,CYP26A1,DLX3,DSP,DUSP1,EOMES,ETV1,FRZB,GADD45A,GBX2,GLI2,GREB1,HEY1,HSPB1,MYC,MYD88,PAX2,PCDH18,PDGFRA,PLAT,PLAUR,POU4F1,SERPINE1,SOCS1,SOD3,SPHK1,SPRR1A,Sprr2g,TEAD2,WLS,ZIC2	403 (22)
KDM1A		enzyme		-0.551	6.06e-11	A2M,ATF3,BCL3,C4A/C4B,CCL4,CCND2,CD274,CD63,CDA,CDKN1A,CEBPB,CHN1,COL1A2,Cryzl2,DDR2,DDX60,DNMT3B,EBF1,EOMES,FLNC,GAP43,GPNMB,GREB1,HLA-A,HMOX1,HSPB8,IFI44,IFIT3,Igkv13-84,IL1RN,Mx2,MYC,MYO1B,PBXIP1,PSAT1,RIN1,SCD,SCN1A,SCN2A,SERPINE1,SFRP1,SNAP25,SYNPO,TRIM37	316 (22)
estrogen		chemical drug	Activated	2.027	6.15e-11	AR,BCL3,CALB1,CCND1,CDKN1A,CFTR,COL18A1,COL3A1,COL4A2,CRH,CYP11A1,DUSP1,EGR1,ESR1,FBLN1,FOS,GAL,GAP43,GJA1,GREB1,HMGCR,HTR1A,IL27,ITGA5,JUN,JUNB,LIF,LPL,LTF,MYC,NFIL3,PDLIM7,PGR,PIM1,PLAT,PRLR,SPP1,STAT3	365 (20)
FAS		transmembrane receptor	Inhibited	-3.058	6.61e-11	ANXA2,CAST,CCL4,CD83,CDKN1A,COL18A1,COL1A2,COL3A1,COL4A1,COL4A2,COL6A3,CRYBG1,EGR1,EGR2,F5,FBN1,FOS,FOSB,GADD45G,GPNMB,IL1RAP,ITGA7,JUN,LGALS3,MMP9,NFKBIE,PDLIM7,PIK3CD,PPP1CC,PTP4A1,PTPRN,PVALB,RASGRP2,RELA,RND1,SDC1,SERPINE1,SIPA1,SORL1,SPP1,TAGLN2,TNFAIP6,TNFRSF1B,TUBA4A	356 (21)
testosterone		chemical - endogenous mammalian		-1.119	8.98e-11	A2M,ANXA3,APLN,AR,ATP1B1,BCL3,BMP4,BMP7,CAST,CCND1,CDK2,CDKN1A,COL3A1,COX6A2,CYP11A1,CYP51A1,CYP7B1,DDIT3,DHCR24,EGR1,EIF4EBP1,ESR1,FOS,FOSB,FOSL1,FOSL2,GADD45A,HDC,HMGCR,IGFBP3,INHBB,INSL3,JUN,MSTN,Mt1,Mx2,PDE5A,PRLR,PTP4A1,RELA,SDC1,SHH,STAT3,TUBB3,UGT8	503 (21)
SP2509		chemical reagent	Inhibited	-2.025	9.58e-11	ADAMTS1,AR,CCND1,CCND2,CD274,CNTN1,CRABP2,CYP26A1,DDR2,DSG2,EFNB1,EHD1,ELOVL6,ESR1,EZR,GAP43,GLI2,HOXB9,IL1RAP,LTBP1,MYC,MYO1B,NEFL,OLFM1,PGR,PIK3CD,PLCB1,POU4F2,PPP2R5B,PSAT1,RCC2,SEMA3C,SERPINI1,SLC7A1,SPP1,STAT3,STC2,TUBB3,ZIC2
methylprednisolone		chemical drug		0.038	1.02e-10	A2M,ADK,ANGPTL2,ANXA2,ANXA3,ATP1B1,BBC3,CAMK1,CCL4,CCND1,CDKN1A,CTSH,CYP4F8,DSG1,DUSP1,EDNRB,EMP1,ENPP2,FBLN5,FDFT1,FOS,GADD45A,HMOX1,IL1RN,INSIG1,ITGA5,ITGA7,JUN,JUP,LAD1,LPL,MLXIPL,MMP9,Mt1,Mx2,MYC,MYO1B,NFKBIE,NR1H4,PIK3CD,PLA1A,PLAT,PLAUR,PLS3,PSAT1,PTPN6,RAB38,RAPGEF4,RGS2,SCEL,SDC1,SERPINE1,SFRP1,SLC6A13,SOD3,STAT3,TINAGL1,TUBA1C,TUBA4A,ZFP36L1,ZYX	393 (22)
sodium arsenite		chemical drug		1.803	1.03e-10	CCND1,CCND2,CDKN1A,DDIT3,EGR1,EGR3,ESR1,FOLR1,FOS,GADD45A,GADD45B,GREB1,HMOX1,JUN,LITAF,PGR,SOCS1,SOCS3	452 (17)
Jnk		group	Activated	3.128	1.03e-10	A2M,APLN,BCL2L11,CCL4,CCND1,CD83,CLDN2,COL3A1,DDIT3,DUSP1,EGR1,FOS,FOSB,GADD45A,GAP43,GJA1,HMOX1,JUN,KLF6,MMP9,MRC2,MYC,NOX4,PLAT,PLAUR,SERPINE1,SESN2,SHH,SOCS3,TGM2,TINAGL1,TNFRSF12A	348 (19)
SBDS		other			1.08e-10	CALB1,CHAC1,CPLX1,DDIT3,DERL3,EGR1,FOS,GABBR2,GADD45B,GAP43,IGFBP7,MAFF,MYD88,P2RX5,PCDH7,PPP2R2C,RGS4,SPP1,TRIB3,UBE2QL1	118 (4)
MAP2K1/2		group	Activated	2.728	1.1e-10	ATF3,BCL2L11,CCL4,CCND1,CCND2,DDIT3,DUSP1,EGR1,EGR2,FOS,FOSL1,GJA1,HMOX1,HSPB1,JUN,MMP9,MYC,PGR,Sik1	364 (20)
doxorubicin		chemical drug	Activated	4.566	1.14e-10	A2M,ADAMTS1,ANXA2,AR,ATF3,BBC3,BCL2L11,BMP4,C4A/C4B,CACNG5,CCND1,CD274,CDK14,CDK2,CDKN1A,COL3A1,DDIT3,DUSP1,EFEMP2,EGR1,EMP3,ESR1,FBLN1,FOS,GADD45A,GPNMB,HMOX1,IGFBP7,JUN,LGALS3,MVP,MYC,NOTCH3,NOX4,OSGIN1,PANK1,PIK3CD,PLA1A,PLAUR,PODN,PTP4A3,RELA,RPRM,RUNX1,S100A10,S100A9,SPHK1,SPP1,STAT3,SYTL1,TES,TGM2,TNFRSF12A,ZBTB42	394 (19)
palbociclib		chemical drug	Activated	2.225	1.34e-10	ATF3,CCND1,CD274,CD83,CDKN1A,CDT1,DDX60,DUSP1,EGR1,EGR3,GADD45A,GADD45B,HLA-A,IFI44,IGFBP3,JUN,JUNB,KLF10,LIF,SOCS3	433 (24)
BMP7	0.501	growth factor		0.713	1.37e-10	ADCYAP1,ADORA1,BMP4,BMP7,CDKN1A,CEBPB,COL1A2,DSP,DUSP1,EDN2,ELAVL4,ESR1,FGF12,GJA1,GLUL,HSPB1,IGFBP3,IL1RN,INA,ITGA5,KCND2,LOXL1,LTF,MMP9,OLFM1,PAX2,PLCB1,PTPRR,RGS2,SERPINE1,SOCS3,SPP1,ZIC2	350 (21)
TWIST1		transcription regulator		1.471	1.39e-10	ADAMTS1,ALCAM,AR,BCL2L11,CDKN1A,DDR2,EMP3,ESR1,FBN2,FIBIN,FMOD,FOS,FOSL1,GSN,LGALS3,LMNA,MGST3,MRC2,OSGIN1,PCDH18,PCOLCE,PDGFRA,RHOC,SHH,SPHK1,SPP1,ST8SIA2,ZYX	370 (24)
ISL1		transcription regulator		-0.691	1.47e-10	A2M,ADCYAP1,ADGRG2,AVIL,BMP4,CALB2,ETV1,GAL,GBX2,ISL2,LILRB3,NTRK3,PCSK2,PIRT,POU4F1,POU4F2,POU4F3,PPP1R1C,PRPH,RUNX1,SCN7A
HMGA1	0.504	transcription regulator		1.052	1.63e-10	B3GALT5,CCND1,CCND2,COL1A2,COL4A1,COL4A2,COX6A2,CTSH,DDIT3,EGR1,ESR1,FOS,FOSL2,GSN,HMGCR,IDI1,IER2,IGFBP3,IGFBP7,INSIG1,JUNB,KITLG,MMP9,Mt3,MYC,SLC27A2,SOD3,STAT3,ZYX	400 (22)
IL4		cytokine	Activated	4.948	1.67e-10	ACOD1,AHR,ANXA2,ARID5A,BACE2,BCL3,BCL6,CAND1,CCDC184,CCL4,CCND1,CCND2,CD274,CD300A,CD79A,CD83,CD8A,CDK2,CDKN1A,CEBPB,Chil3/Chil4,CLDN2,CMPK2,COL18A1,COL1A2,COL3A1,COL6A3,DDAH1,DSG1,EGR2,ELAVL4,EOMES,FLNA,FLRT2,FOS,FOSB,GADD45B,GADD45G,GBE1,GBP6,GBP7,GJA1,GPR84,HDC,HMGCR,IER2,IFI44,IFIT3,IL1RN,JAK3,JUN,JUNB,KITLG,KLF6,LGALS3,LIF,LPL,MAPKAPK3,MMP9,MYC,MYH9,NFIL3,NFKBIE,PDE4B,PIM1,PLCD1,PRKCD,RASSF4…	425 (19)
Wy 40905		chemical reagent	Activated	3.289	1.71e-10	ADCYAP1,AR,ATF3,CD68,CDKN1A,EGR1,EGR2,FOS,FOSB,FOSL1,GADD45B,IER2,JUN,JUNB,KLF6,RFX2,RGS2,SERPINE1	361 (21)
IL5		cytokine		1.962	1.76e-10	A2M,ANXA2,ATP1B1,BCL3,BCL6,CCND2,CD63,CD79A,CDKN1A,EGR1,EGR2,EGR3,EIF4EBP1,FOSL2,GADD45A,GADD45G,GBP7,HMGCR,IDI1,IER2,MMP9,MYC,NFIL3,PDE4B,PIM1,PSAT1,PYCR1,RASGRP2,RBPMS,SCEL,Serpina3g (includes others),SLC7A5,SOCS1,THY1,TNFRSF4,TUBB2B,ZYX	333 (21)
SIN3A		transcription regulator		-1.667	1.94e-10	BCL6,CCND2,CD274,COL1A2,DDIT3,ESR1,GADD45B,INA,KLF10,KLF6,MMP9,MYC,NEFH,Nefm,S100A9,SCN2A,SERPINE1	324 (18)
Tgf beta		group	Activated	2.854	2.01e-10	AHR,ATP1B1,CCL4,CCND1,CCND2,CD274,CD79A,CDK2,CDKN1A,CEBPB,CHST11,COL1A2,COL3A1,COL4A1,COL4A2,EGR2,FBLN2,FOS,GADD45B,GLI2,HEY1,HIF3A,HMOX1,HSPG2,IGFBP3,IL1RN,ITGA5,JUN,JUNB,KLF10,LIF,LOXL1,MAFK,MID2,MLXIPL,MMP9,MYC,MYCBPAP,NID2,NOX4,PHLDB1,PLAT,RUNX1,SDC1,Serpinb6c,SERPINE1,SLFN12L,SOCS3,SPP1,TNFRSF12A	415 (19)
MAPT		other		1.719	2.02e-10	A2M,ASPG,ATF3,ATP1A2,ATP1B1,BCL3,C4A/C4B,CAST,CCL4,CCND1,CD274,CD63,CDKN1A,CEBPB,Cryzl2,DDX60,EIF5A2,FLNC,FOS,GAP43,GPNMB,GRIN2A,GSTM5,HK1,HLA-A,HMOX1,HSPB1,HSPB8,IFI44,IFIT3,Igkv13-84,IL1RN,ITGA5,JUN,LDHB,LRP1B,MMP9,Mt3,Mx2,NEFH,NMNAT2,PBXIP1,PVALB,SEPTIN9,SERPINE1,SH3GL2,SNAP25,SQSTM1,THY1,TPPP,TUBA1C,TUBA4A,TUBB2B,TUBB3,TUBB6,VSNL1	425 (21)
HGF		growth factor	Activated	3.912	2.02e-10	A2M,ADAMTS1,ADGRG1,AHR,AKAP12,ANGPTL2,ATF3,CCL4,CCND1,CDK2,CDKN1A,CLCF1,COL1A2,COL3A1,COL4A1,DDIT3,DOK5,DSG1,DUSP1,EGR1,EMP1,FLNA,FOS,FOSB,FOSL1,HELLS,HK1,HMOX1,IGFBP3,INSIG1,JUN,JUNB,KITLG,KLF6,MMP9,MYC,NID2,PIM1,PLAUR,PTPRR,RGS2,RIN1,S100A9,SEMA3A,SERPINE1,SFRP1,SLC7A1,SOCS3,SPP1,STAB1,TAGLN2,TNFAIP6	391 (21)
HMG20A		transcription regulator	Activated	2.132	2.18e-10	ATF3,CYP51A1,FDFT1,FLNA,GADD45A,HMGCR,HMGCS1,IGFBP3,ITGA5,JUN,LIF,MYC,NIBAN1,PLAUR,SERPINE1,SLC7A1,SPHK1,STARD4,TGM2,THY1,TNFRSF12A,TRIB3	153 (7)
Ngf		group		0.448	2.18e-10	ANXA2,BBC3,BCL2L11,CALB1,CCND1,CDKN1A,DUSP1,EGR1,FOS,Hrk,IER2,JUN,PLAUR,SERPINE1,THY1,TTLL7,TUBB3,VGF	370 (21)
tazemetostat		chemical drug	Inhibited	-2.009	2.25e-10	ADAMTS1,AR,CCND1,CCND2,CNTN1,CRABP2,CYP26A1,DDR2,DSG2,EFNB1,EHD1,ELOVL6,ESR1,EZR,GAP43,GLI2,HOXB9,IL1RAP,LTBP1,MYC,MYO1B,NEFL,OLFM1,PGR,PIK3CD,PLCB1,POU4F2,PPP2R5B,PSAT1,RCC2,SEMA3C,SERPINI1,SHH,SLC7A1,SPP1,STAT3,STC2,TUBB3,ZIC2	259 (13)
2-amino-5-phosphonovaleric acid		chemical - other		-1.628	2.58e-10	ADAMTS1,ARID5A,B3GALT5,BBC3,BVES,DOK7,DUSP1,EGR1,EGR2,EGR3,FOS,FOSB,GADD45A,GADD45B,GADD45G,HDAC9,JUN,JUNB,NRN1,OLFM1,PLEKHO1,Pou6f2,RGS2,RUNX1T1,TSPAN18	369 (22)
Hdac		group	Inhibited	-2.617	2.66e-10	ADAMTS1,AHR,ATF3,BCL6,CCND1,CDKN1A,CRABP2,CRH,DDIT3,DNMT3B,EDNRB,EGR1,EGR3,FOS,FOSL1,GADD45B,GLI2,IGFBP3,JUN,JUP,KLF10,KLF6,MYC,ROBO2,SEMA3C,SFRP1,SPP1	428 (21)
CNTF		cytokine	Activated	3.203	2.84e-10	A2M,ATF3,B3GAT2,CLIC1,CLIC4,EDN2,EGR1,EGR2,ENPP2,FGF9,FOS,GJA1,GPNMB,HMOX1,IGFBP7,IL1RN,JUNB,LGALS3,LIF,NUDT6,RAB3C,RPH3A,SATB2,SCD,SCN2B,SLC11A1,SOCS1,SOCS3,SPP1,STAT3,VIP	242 (18)
STAT5B		transcription regulator		1.362	3.05e-10	A2M,ADGRG1,AR,BCL6,CCND1,CCND2,CD63,CDKN1A,COX6A2,CYP39A1,DDIT3,DUSP1,EBF1,ESR1,FBLN1,FOS,FOSL2,GADD45A,GADD45B,GBP6,GLUL,GSTM5,HLA-A,Ifitm1,IFITM2,JUN,LDHB,LTBR,MYC,NIBAN2,NOX4,PDK4,PIM1,PRLR,RELA,SCD,Serpina3g (includes others),SOCS1,SOCS3,TGM2,TNFRSF4,TRIM47	399 (20)
EPAS1		transcription regulator		-0.414	3.3e-10	AKAP12,APLN,BBC3,CCND1,CD274,CDKN1A,CEBPB,CLDN1,CYP51A1,DDIT3,FBLN2,FOS,GADD45B,GBE1,GJA1,HMGCS1,IGFBP3,INHBB,LPL,MAFF,NEFL,NFIL3,NRN1,P2RY1,PCDH10,RAB27B,RGS4,RIPK1,SERPINE1,SLC6A8,SLC7A5,SPHK1,STC2,TNFRSF4	407 (23)
IL33		cytokine	Activated	3.233	3.88e-10	ADAMTS1,ARHGAP30,BCL2L11,BCL3,CCL4,CCND1,CD83,Chil3/Chil4,CHST11,CLEC4E,COL3A1,EGR2,EGR3,EHD1,ELMO1,FOSL2,GADD45B,GSTM5,HDC,HMOX1,Ifitm1,IL1RN,ITGA5,JUNB,LAMA5,MDK,MMP9,MYC,NFIL3,NFKBIE,P2RY1,PGM2,PIK3CD,PLAT,PSAT1,RASGRP1,RASSF4,RELA,S100A9,SERPINE1,SLC11A1,SLC7A11,SOCS3,TNFRSF1B,TNFRSF4,TUBB6	361 (17)
E. coli B4 lipopolysaccharide		chemical toxicant	Activated	3.881	4.54e-10	ACOD1,ARHGAP30,CALML4,CCL4,CD274,CD83,CLDN1,EMB,ESR1,F5,FIBIN,FOLR1,FOSB,GADD45G,GNAI1,GPNMB,HLA-A,HMOX1,HSPB8,IFIT3,IL1RN,IL27,LILRB3,PANK1,PIM1,PLAUR,PLEKHG2,PTPN6,RAB20,RHOC,SOCS1,SOCS3,STAB1,STC2,TNFRSF1B,TNFRSF4	321 (16)
Pkc(s)		group	Activated	2.124	5.08e-10	AHR,APLN,ATF3,BCL2L11,CDKN1A,CLDN1,COL3A1,DDIT3,DUSP1,EGR1,EGR2,ELAVL4,FOS,FOSL1,GADD45A,GADD45B,GAP43,HMGCR,HMOX1,ITGA5,JUN,JUNB,KLF6,MAFK,MMP9,NOX4,PTPRN,RGS2,SERPINE1,SPP1,STC2	324 (18)
raloxifene		chemical drug		-0.036	5.26e-10	ACVRL1,ANXA3,BCL3,BMP4,CCND1,CDKN1A,CTSH,DUSP1,EGR3,ENPP2,ESR1,GREB1,HMOX1,INHBB,JUN,KLF6,LITAF,MATN2,MYO1B,PDGFRA,PGR,PVALB,SERPINE1,SNCG,SOCS1,SPP1,TUBA4A	424 (23)
INHA		growth factor		-0.638	5.63e-10	ADAMTS1,CCND2,COCH,COL1A2,COL3A1,COL4A5,COL4A6,CYP11A1,CYP51A1,DHH,INHBB,ITGA3,KITLG,LMNA,LTBP1,MATN2,MYC,PCDH7,PIK3CD,PRLR,SERPINE1	268 (12)
4-hydroxytamoxifen		chemical drug	Activated	2.558	5.99e-10	ANGPTL2,ATF3,BCL2L11,CCND1,CDKN1A,CEBPB,DDIT3,DUSP1,EDN2,EGR1,ESR1,FOS,FOSB,FOSL2,GABBR2,HTR1A,IER2,IGFBP3,JUN,JUNB,MYC,NOTCH3,PDK4,PGR,POLD4,RND1,S100A9,SPHK1	371 (21)
ITGB1		transmembrane receptor		-0.846	6.71e-10	BMPR1B,CCL4,CDKN1A,COL1A2,EIF4EBP1,FBN2,FGF1,FLNA,FOS,HLA-A,HSPG2,IL1RN,ITGA3,ITGA5,ITGA7,JUN,JUNB,LOXL1,MATN2,MMP19,MMP9,MYC,PLAUR,SERPINE1,SHH,TGM2	361 (21)
IKBKB		kinase	Activated	2.905	6.77e-10	ACOD1,AR,ATF3,CCL4,CCND1,CDK2,CDKN1A,CEBPB,CH25H,CLDN1,COL3A1,CYP7B1,EGR1,ENPP2,FOS,GADD45A,HLA-A,HMOX1,IGFBP7,IL1RN,JUNB,MMP9,Mt1,MYC,MYD88,OGN,PCDH7,RELA,SEMA3C,SFRP1,SOCS1,SOCS3,SOD3,STAT3,TNFRSF1B,TNFRSF4,TRPC1	383 (17)
crocidolite asbestos		chemical toxicant	Activated	3.131	7.07e-10	CCND1,FOS,FOSL1,FOSL2,GADD45A,JUN,JUNB,LIF,MYC,PRKCD,SPP1,ZYX	361 (17)
SCAP		other	Inhibited	-2.756	8e-10	ATF3,ATF5,CYP51A1,DDIT3,ELOVL6,FDFT1,HMGCR,HMGCS1,IDI1,INSIG1,LGALS3,MSMO1,MTHFD2,SCD,SLC7A1,SPRR1A,SQSTM1,STARD4,TRIB3	303 (11)
Histone h3		group		1.067	8.27e-10	AKAP12,ATF3,BBC3,BCL2L11,BMP4,CCND1,CCND2,CDK14,CDKN1A,COL1A2,COL4A6,CRH,DDIT3,EGR1,EOMES,ESR1,FOS,GBX2,IGFBP3,ITGA5,JUN,LRRC55,MMP9,Mt1,MYC,Nes,NKD1,OSGIN1,PGR,POLD4,POU4F3,PRLR,RAB27B,RAB38,RGS4,RPRM,RUNX1T1,S100A9,SATB2,SCD,SCN1A,SFRP1,SHH,SOCS3,SOX11,SPHK1,SPP1,Tpm4,WLS,ZMAT4	390 (22)
lovastatin		chemical drug		0.158	8.4e-10	ACAT2,ADAMTS1,AR,ATF3,CCND1,CDKN1A,DDIT3,ESR1,FDFT1,FGF9,GAP43,GPX3,HELLS,HMGCR,HMGCS1,HMOX1,LIF,LMNA,MYC,MYT1L,NOX4,PLAT,RHOC,SERPINE1,TAGLN2	388 (22)
RELA	0.352	transcription regulator	Activated	2.305	8.66e-10	A2M,AHR,ALCAM,AR,BBC3,BCL2L11,BCL3,CCND1,CD274,CDKN1A,CEBPB,CFTR,COL1A2,CTTN,DDIT3,DNMT3B,DUSP1,EGR1,ELMO1,EOMES,FOS,FOSB,GLI2,GPRIN3,HLA-A,HMOX1,HTR1A,IER2,IL1RN,IL27,JUN,JUNB,KLF10,MMP9,MYC,NEFH,NFKBIE,PAX2,PDE4B,PRKCD,PTPN6,RELA,SCN2A,Serpina3g (includes others),SHH,SYTL1,TGM2,TNFRSF4,TUBB3	345 (13)
IAPP		other		1.981	8.85e-10	BACE2,CYP51A1,FDFT1,FOS,HMGCR,HMGCS1,IDI1,MSMO1,MYC,STAT3	360 (17)
FOXO1		transcription regulator		0.905	9.28e-10	A2M,ANXA3,APLN,AR,BCL2L11,BCL6,CCL4,CCND1,CDKN1A,CH25H,COL4A1,COL4A2,CYP7B1,EBF1,EDNRB,EGR1,EGR2,EIF4EBP1,ELOVL6,EOMES,FMOD,FOLR1,FOS,FOSB,GADD45A,GADD45B,GFPT2,GPX3,HMGCR,HMOX1,IGFBP7,ITGA3,JUN,JUNB,LPL,LTBR,MLXIPL,MMP9,MYC,NR1H4,PCK2,PDK4,PRKCD,RELA,SCD,SERPINE1,SLC25A37,SPC25,TRIB3	367 (23)
aplidine		biologic drug		1.98	9.46e-10	DUSP1,FOS,FOSB,FOSL1,JUN,JUNB,RELA	396 (19)
estradiol-17beta-benzoate		chemical reagent		-0.756	9.78e-10	CALML4,CCND1,CHST11,CLDN2,COL3A1,ENPP2,EZR,FMOD,FOLR1,FOSL2,GBP6,GLUL,GPR88,GREB1,HLA-A,HS3ST5,IGFBP3,INF2,JAK3,LAMB3,MRC2,MYC,PCDH20,PGR,RAB37,SDC1,SLC13A4,SYT2,VGF,VIP	235 (7)
nicotine		chemical drug		1.137	9.87e-10	AHR,CCL4,CCND1,CCND2,CDKN1A,CEBPB,CHRNA6,CHRNB4,CNTN1,COL3A1,DDIT3,EGR1,FGF9,FOS,GJA1,GNAL,GRIN2A,GRM1,HMOX1,JUNB,LGALS3,LITAF,MMP9,PLAT,PLAUR,RAB6A,RELA,SERPINE1,SERPINF1,SPP1,STAT3,TRPC1	289 (20)
STAT1		transcription regulator		1.196	1.13e-09	A2M,ACOD1,BCL2L11,BCL6,C4A/C4B,CALHM6,CCL4,CCND1,CCND2,CD274,CDK2,CDKN1A,CH25H,Chil3/Chil4,CMPK2,COL3A1,DDX60,EGR1,FOS,GBP6,GREB1,GRIN2A,HEY1,Hrk,IFI44,IFIT3,IFITM2,ITGA5,JUN,LIF,LPL,MMP9,Mx2,MYC,NOX4,PIM1,RUNX1,S100A10,Serpina3g (includes others),SHH,SLFN12L,SOCS1,SOCS3,SPRR1A,STAT3	351 (14)
diclofenac		chemical drug	Activated	3.068	1.2e-09	ATF3,CCND1,CDKN1A,CEBPB,DDIT3,EIF4EBP1,FOS,JUN,LGALS3,MTHFD2,MYC,PSAT1,SERPINE1,SHMT2,SLC7A1,SQSTM1,STC2,TNFRSF12A,TRIB3	274 (20)
gentamicin		chemical drug	Activated	3.176	1.27e-09	ALCAM,ATF3,BMP4,BMP7,C4A/C4B,CAND1,CCND1,CD63,CEBPB,CNKSR3,DDIT3,EGR1,ENPP2,FOS,GADD45A,GRM1,GSTM5,HMOX1,HSPB1,IGFBP3,JUN,JUNB,KLF6,LGALS3,LITAF,MAPKAPK3,MYC,MYO1B,PHGDH,PSAT1,PTP4A1,RESP18,RIPK1,SCOC,SPP1,SQSTM1,STAT3,THY1,UGT8,ZFP36L1	341 (16)
GNAS		enzyme		1.143	1.31e-09	ADAMTS1,ALCAM,ATF3,BCL6,CDK2,CDT1,FOS,FOSL2,GADD45G,GLI2,HDAC9,LITAF,MAFF,MYC,PDE4B,PPP1R16B,RAPGEF4,RGS2,Rnf125,SCD,SEMA3A,SPP1,STAT3,TNFRSF1B,TUBB2B,VGF,ZYX	394 (21)
INSIG1	-0.514	other		1.709	1.37e-09	ATF3,CD68,CLEC4D,CLEC4E,CYP51A1,DDIT3,DHCR24,ELOVL1,ELOVL6,FDFT1,HMGCR,HMGCS1,IDI1,JUN,LPL,MLXIPL,RAB27A,S100A9,SCD,STARD4,TRIB3	307 (11)
HDAC4		transcription regulator		-0.2	1.38e-09	ATF3,C1QC,CALB1,CCND1,CDKN1A,CHN1,CNTN1,EGR2,ETNPPL,FOS,FOSL1,GADD45A,HDAC9,HMGCR,JUN,LGI1,MAPK10,MMP9,RAB3C,RGS2,RGS4,SH3GL2,SNAP25,TNFRSF12A	300 (19)
HIF1A		transcription regulator		0.987	1.4e-09	ADAMTS1,AHR,AKAP12,APLN,CCL4,CCND1,CD274,CDKN1A,CLDN1,COL1A2,COX6A2,CYP2S1,EDNRB,FOS,GADD45B,GBE1,GJA1,HIF3A,HMOX1,HSPB1,IGFBP3,IL27,INHBB,ITGA5,JUN,JUP,KITLG,LOXL1,MAFF,MMP9,MYC,NEFL,NOTCH3,NOX4,NRN1,PCDH10,PCK2,PLAUR,PRKAR2B,RAB11FIP4,RAB20,RELA,RIPK1,SCD,SERPINE1,SESN2,SFRP1,SHH,SLC25A37,SOCS3,SPHK1,STAT3,STC2,TRIM66	386 (21)
streptozocin		chemical drug	Activated	2.752	1.41e-09	APLN,AR,ATF3,ATP1A2,ATP1B1,BBC3,CALB1,CD68,CDKN1A,COL3A1,COL4A1,DNMT3B,ELOVL6,ESR1,FBN1,FOS,GPX3,HMOX1,HSPG2,LGALS3,LPL,MLXIPL,MMP9,NOX4,NTRK3,PCSK2,PDGFRA,PDK4,PTPRN,RELA,SCD,SERPINE1,SESN2,SLC7A11,SOD3,SPP1	421 (21)
Alpha catenin		group	Inhibited	-4.139	1.44e-09	ADAMTS1,BCL3,COL1A2,COL3A1,COL6A3,GAP43,IGFBP7,ITGA5,KRT6B,MMP19,MMP9,MYC,NKD1,PDGFRA,RHOC,RHOJ,S100A9,SOCS3,TGM2,TNFAIP6,TNFRSF12A,ZYX	328 (16)
WNT3A		cytokine		1.595	1.5e-09	ADM2,AHR,ATP1B1,BBC3,BCL2L11,BMP4,CCND1,CCND2,CD274,CD300A,CD68,CDK15,CEBPB,COL1A2,EFNB1,EGR2,EOMES,FMOD,GADD45G,GAP43,GPNMB,JUN,KITLG,MYC,Nes,NKD1,NOTUM,OGN,PDGFRA,RUNX1,RUNX1T1,SHH,SLC27A2,SLC7A1,SLC7A11,THY1,TNNT2,TRIB3,TUBB3,ZCCHC12	364 (22)
EIF2S1		translation regulator			1.52e-09	ADM2,ALDH1L2,CCND1,CEBPB,CH25H,CHAC1,DDIT3,GADD45A,HHIPL1,HMOX1,NUPR1,Serpina3g (includes others),SESN2,SLC7A11,TRIB3	195 (7)
TAS4464		chemical drug	Activated	2.887	1.66e-09	BBC3,BCL6,CDK2,CDKN1A,EGR1,FOS,GADD45A,KLF6,LAMB3,MYC,SLC3A2,SLC7A5	298 (12)
ATN1		transcription regulator			1.68e-09	ATP1B1,BCL6,EBF1,ETV1,FGF1,GSN,JUP,KCNA2,MARCKSL1,NEFH,NEFL,Nefm,NPTX1,NSG2,OPRL1,PRKCD,PVALB,Sik1,SOX11,SPP1,TUBA4A,VAMP1,VSNL1
GNA15		enzyme			1.92e-09	AKAP12,BMP4,DDIT3,FBLN5,FOSL1,GADD45A,GLUL,HMOX1,IL1RN,LGALS3,MAFK,Mt1,MYC,NOX4,PLAT,RAPGEF4,RGS2,SCN2A,SLC7A1,TRIB3,ZFP36L1	295 (17)
PTEN		phosphatase	Activated	2.183	2.1e-09	APOBR,AR,ATF3,BACE2,BBC3,BCL2L11,BCL3,CCND1,CD274,CDKN1A,CEBPB,CHML,CLDN1,CNNM4,COL18A1,COL3A1,COL4A1,COL4A2,COL5A3,DUSP1,EGR2,EIF4EBP1,ELOVL6,ESR1,FDFT1,FGF1,FGF9,FOS,GPR176,GPX3,HMGCR,HMGCS1,IDI1,IGFBP3,JUN,KLF6,LAD1,LDHB,LGALS3,LOXL1,MAFK,MAPKAPK3,MMP9,MT-ATP6,Muc1,MYC,Neat1,NFIL3,PHGDH,PIM1,PRMT2,RAB38,RUNX1,SCD,SDC1,SERPINE1,SFRP1,SHH,SLC25A45,SLC5A8,SOCS3,SPP1,STAT3,TOM1,TSC22D3	408 (22)
H-7		chemical - kinase inhibitor	Inhibited	-2.386	2.43e-09	CLCF1,COL1A2,EGR1,FOS,HDC,ITGA5,JUNB,Mt1,MYC,PIM1,SERPINE1,STAT3,TRHR	367 (18)
S100A9	3.099	other		1.02	2.51e-09	A2M,ADAMTS1,AKAP12,APLN,ATF3,BACE2,BCL3,CCND1,CD274,COX6A2,ENPP2,FOSL1,LTBP1,MMP9,MYC,NR1H4,NTRK3,PRSS12,RAB20,ROBO2,S100A9,SCUBE1,SOCS3,TKTL1,TNFRSF4,VGF	293 (18)
KIT		transmembrane receptor		-0.218	2.68e-09	BCL2L11,CCND2,CD274,CD63,ETV1,HDC,HMOX1,IFIT3,IL27,KITLG,LGALS3,LIF,MYC,PRKCQ,PTPN6,RAB27B,SH3BP2,SOCS1,SOCS3,SPP1,STAT3	356 (21)
2-bromoethylamine		chemical reagent	Activated	3.043	2.73e-09	A2M,ADAMTS1,ANXA2,C4A/C4B,CACNG5,EFEMP2,EMP3,GPNMB,LGALS3,MYC,PLA1A,S100A10,SPP1,TNFRSF12A
CSF3		cytokine	Activated	2.115	2.95e-09	CAMK1,CCND2,CDK2,CEBPB,CTTN,EGR1,EGR2,EGR3,ENPP2,FOS,GADD45A,GADD45B,GADD45G,GJA1,HDC,HMOX1,IL1RN,JAK3,JUN,KITLG,LTF,MMP9,MYC,NFIL3,PIM1,RAB27A,SOCS1,SOCS3,STAT3,TNFRSF1B	376 (17)
okadaic acid		chemical toxicant	Activated	2.409	3.13e-09	AR,BCL2L11,BCL6,CCND1,CCND2,CRABP2,EGR1,ESR1,FOS,FOSB,FOSL2,IL1RN,JUN,JUNB,MMP9,MYC,PIM1,SPP1,SQSTM1	367 (22)
arsenite		chemical toxicant	Activated	3.062	3.15e-09	AHR,CCND1,CDK14,CDKN1A,DDIT3,DUSP1,EGR1,FOS,GADD45A,GSTM5,HMOX1,HS6ST2,HSPB1,IL1RAP,INHBB,JUN,MAFF,MYC,PLCB1,SERPINE1,SQSTM1	336 (18)
MAPK3		kinase		1.091	3.53e-09	BCL2L11,BMP4,CCND1,CDKN1A,COL3A1,EGR1,EGR2,ESR1,FOS,FOSB,FOSL1,FOSL2,HDC,JUN,JUNB,MMP9,MYC,PLAUR,RGS2,SPP1	386 (23)
ADCYAP1	1.84	other		0.707	3.54e-09	ADCYAP1,CCBE1,CCL4,CEBPB,CLCF1,COL3A1,CRH,DLL3,EDIL3,EGR1,EGR2,EGR3,EMB,ENPP2,FOS,GAP43,GPR101,GREB1,GREM2,HAPLN1,HK1,LMO1,MYC,PTPRR,RELA,S100A10,SERPINF1,SNAP25,SOCS3,TUBB2B,VIP	326 (22)
BRD4		kinase		1.616	3.66e-09	BBC3,BCL3,CCND1,CCND2,CD274,CDKN1A,COL1A2,COL4A1,DDIT3,DERL3,FBN1,FOS,FOSL2,GADD45A,GALNT14,HMOX1,ITGA5,LOXL1,MYC,MYD88,PIM1,PLAT,SESN2,SPP1,STC2,SUSD2	384 (20)
halofuginone		chemical drug		-1.091	3.7e-09	AKAP12,C4A/C4B,COL1A2,EDNRB,EGR1,EMP1,FBLN5,FBN1,GPX3,HK1,Hrk,IFITM2,IGFBP3,ITGA7,LTBP1,MLXIPL,MMP9,PCOLCE,PDGFRA,PRLR,PTGFRN,SPP1,TGM2,VSNL1	326 (16)
dinoprost		chemical - endogenous mammalian	Activated	2.77	4.32e-09	CCND1,CCND2,CYP11A1,ESR1,FOS,FOSL2,GSTM1,JUN,LPL,MMP9,MYC,NFIL3,PGR,PLCD1,PRLR,PTGFR,SPP1	342 (23)
enalapril		biologic drug		-0.815	4.59e-09	A2M,ADAMTS1,C4A/C4B,CACNG5,COL3A1,COL4A1,EFEMP2,FBLN2,FBN1,GPX3,HMOX1,HSPB1,LGALS3,MYC,S100A10,SERPINE1,SPP1,TNFRSF12A	409 (20)
lapatinib		chemical drug		-1.664	4.93e-09	BCL2L11,ESR1,FOS,FOSB,FOSL1,FOSL2,JUN,JUNB,LAMB3,PGR	389 (21)
PRKAA1		kinase		0.833	5.28e-09	ACOT7,ASTN1,ATF3,CDKN1A,DDAH1,DDIT3,HMGCR,IFI44,KCNA2,KCNQ2,KLHL29,LITAF,MATN2,MMP9,PARP3,PCOLCE,PDGFRA,PTPRN,PTPRR,RGS2,SERPINI1,SOCS3,SORL1,TGM2,ZFP36L1,ZYX	352 (23)
MKNK1		kinase		0.062	5.28e-09	ACOT7,ANXA2,BAG3,Cdsn,CLCF1,COL4A6,EGR1,FLNA,FOS,FOSB,GAP43,Gm20652,GNAI1,HS6ST2,KIF5A,MMP9,MYC,Neat1,NELL2,PDK4,Rab15,SFRP1,SNAP25,Spaca6,TTC3,VSNL1	169 (7)
FADD		other	Inhibited	-2.047	5.57e-09	ARID5A,CCND2,CDK2,CDKN1A,EGR1,ELAVL2,FOS,GADD45B,JUN,JUNB,KLF6,MMP9,Mx2,MYC,NFIL3,PIM1,RIPK1,SOCS1	337 (18)
NCOA2		transcription regulator		-1.152	6.22e-09	ADORA1,AHR,AR,CCL4,CCND1,CDKN1A,CEBPB,CYP51A1,EGR1,ELOVL6,FRZB,GBE1,GPX3,GSTM5,HLA-A,HMGCR,HMGCS1,IDI1,Ifitm1,LPL,PGR,SOD3,SQSTM1,SRXN1,TSC22D3	446 (27)
MAP2K5		kinase	Inhibited	-2.228	6.43e-09	CCND1,CYP51A1,DHCR24,ELOVL6,FDFT1,FOS,HMGCR,HMGCS1,IDI1,INSIG1,JUN,MMP9,MSMO1,STARD4	333 (21)
Growth hormone		group	Activated	2.856	7.11e-09	BCL6,BMP4,BMP7,CALB1,CCND1,CCND2,CEBPB,COL18A1,COL3A1,DDIT3,EGR1,FOS,FOSL2,GSTM1,GSTM5,IGFBP3,JUN,JUNB,KLF10,LPL,MMP9,MSTN,MYC,NOX4,PDK4,PRLR,RPH3A,Serpina3g (includes others),SOCS1,SOCS3,SPP1	345 (22)
AKT1		kinase	Activated	2.349	7.11e-09	ACAT2,AR,BCL2L11,C1QC,CCL4,CCND1,CCND2,CDK2,CDKN1A,COL4A1,DLX3,EGR1,ESR1,EZR,FOS,FOSB,GSTM5,HMGCR,HMGCS1,HMOX1,LDHB,MMP9,MSMO1,MSTN,MYC,NOTCH3,NOX4,PCOLCE,PDGFRA,PGR,SCD,SERPINE1,SERPINF1,SLC3A2,SPP1	397 (21)
JAK2		kinase	Activated	2.103	7.18e-09	AKAP12,BBC3,BCL2L11,BMP7,CCND1,CCND2,CD79A,CDKN1A,EGR1,ENPP2,ESR1,F5,FOS,Ifitm1,ITGA5,LAT2,MYC,Neat1,PHLDA3,SLC11A1,SOCS1,SOCS3,STAT3,TGM2	361 (22)
butyric acid		chemical - endogenous mammalian		0.136	7.23e-09	A2M,ADGRG1,ANXA2,AR,CALB1,CCND1,CCND2,CD83,CDK2,CDKN1A,CLDN1,CLDN2,COL4A1,COL4A2,COL6A3,CYP11A1,DHCR24,DUSP1,EMP3,ESR1,FOS,GADD45A,GSN,HDAC9,HK1,HSPG2,IFIT3,IFITM2,IGFBP3,ITGA5,MMP9,MVP,MYC,PLAT,PRKCD,PRLR,PTPRN,RELA,SERPINE1,SIPA1,SOCS3,SPP1,STAT3,TGM2,TUBA4A,ZFP36L1	441 (20)
Mek		group		0.62	7.24e-09	BCL2L11,CCND1,CCND2,CD63,CDKN1A,CLDN2,COL1A2,DDR2,DNMT3B,EGR1,EGR2,EGR3,ESR1,ETV1,FOS,FOSL1,GAP43,HSPB1,IER2,JUN,JUNB,LAMB3,MAFF,MMP9,MYC,NOX4,PDGFRA,PLCD1,POU3F2,RUNX1,SDC1,SEMA3C,SEMA6A,SERPINE1,SLC7A1,SNCG,SORL1,UGT8	390 (21)
CREBBP		transcription regulator		1.611	7.53e-09	ADCYAP1,AKAP12,AR,ARHGEF3,ARID5A,BCL6,BMP7,CCND1,CCND2,CDKN1A,COL1A2,CYP11A1,DUSP1,EGR1,EGR2,EGR3,EOMES,FOS,FOSB,FOSL2,GRIN2A,GRM1,HMGCS1,JUN,JUP,LPL,MMP9,MYC,NTRK3,PDLIM4,PGR,PIM1,PRKCD,RAPGEF3,RAPGEF4,RGS2,Rnf125,SCN4B,SDC1,SH2D1A,SLC7A11,SOCS3	384 (27)
cyclosporin A		biologic drug		1.118	7.64e-09	A2M,ADORA1,ANXA2,ATF3,BCL2L11,C4A/C4B,CACNG5,CALB1,CCL4,CCND1,CD68,CD83,CDKN1A,COL4A2,EDIL3,EDNRB,EFEMP2,EGR1,EGR2,EMP3,F5,FDFT1,FLNA,FOS,FOSB,GJA1,GPNMB,HELLS,HMGCR,HMOX1,JUN,LGALS3,MMP9,MYC,PRLR,RUNX1,S100A10,S100A9,SCD,SERPINE1,SHH,SOCS1,SPHK1,SPP1,TNFRSF12A	387 (20)
CEBPB	1.4	transcription regulator		1.277	8.46e-09	APLN,C1QC,CCL4,CCND1,CCND2,CD274,CDKN1A,CDT1,CEBPB,CFTR,CLEC4E,COL1A2,CRH,CYP11A1,DDIT3,DLX3,EDIL3,FBLN1,FOS,GADD45A,HDC,HELLS,HLA-A,HMGA1,IFIT3,IGFBP3,IL1RN,JUN,KLF10,KRT6B,LIX1,MYC,NUPR1,PDGFRA,PDK4,PLAUR,PLXND1,POLA2,PRKAR2B,PRKCD,PRLR,PTGFR,RGS4,SCD,SERPINE1,SLC7A1,SOCS3,SPC25,SPP1,SPRR1A,STAT3,TNFAIP6,TRIB3,TUBB3,ZYX	367 (20)
bexarotene		chemical drug	Inhibited	-2.034	8.77e-09	ALCAM,BMP7,CCND1,Chil3/Chil4,CPLX1,CTSH,CYP26A1,DUSP1,EGR3,GRIN3A,IER2,KLF10,LPL,MAFF,MMP9,Mt3,MTHFD2,Nes,PLAT,PLAUR,S100A9,SCD,SLC7A1,SLC7A5,TGM2,TSC22D3,TUBB3	416 (21)
3-deazaneplanocin		chemical drug		0.843	8.97e-09	CD274,CDKN1A,CEBPB,GBX2,GPNMB,IGFBP3,KCNC4,KLF6,LAMB3,MVP,MYC,NOX4,NUPR1,PPP1R18,SQSTM1,TSC22D3	313 (18)
TCR		complex	Activated	3.346	9.8e-09	ARPP21,BCL2L11,BCL3,CCL4,CCND1,CDK2,EGR1,EGR2,EOMES,F5,FLNA,FOS,GADD45B,GADD45G,GRM1,IFI44,IFIT3,JUN,JUNB,LDHB,MYC,MYD88,PIK3CD,PIM1,RASGRP1,RELA,RIPK1,RUNX1,SEMA3A,SOCS1,SOCS3,SPHK1,SPP1,STAT3,TNFRSF12A,TNFRSF1B,TNFRSF4,TSC22D3,UNC13D,ZC3HAV1	345 (21)
ERK		group	Activated	4.067	1.05e-08	BCL2L11,CCL4,CCND1,CDKN1A,COL3A1,CTTN,DNMT3B,DUSP1,EGR1,EGR2,ESR1,FOS,FOSL1,FOSL2,HEY1,HMGA1,HMOX1,JUN,JUNB,KLF10,LIF,MAFF,MMP9,MYC,NOTCH3,PDK4,RGS4,SERPINE1,STMN4,TGM2,ZFP36L1	339 (21)
NR3C2		ligand-dependent nuclear receptor	Activated	2.39	1.06e-08	ADAMTS1,ATP1B1,BMP4,Chil3/Chil4,CNKSR3,COL3A1,EGR1,FKBP1B,GPX3,HTR1A,JUNB,NOX4,PLAT,RAPGEF4,RGS2,SEMA3C,SERPINE1,SPHK1,SYT2,TGM2,TSC22D3,TUBA4A,TUBB3	425 (25)
triptolide		chemical drug	Inhibited	-2.749	1.06e-08	ACVRL1,AHR,AKAP12,APLN,AR,BBC3,CDKN1A,DUSP1,EDNRB,EMP1,FBLN5,FBN1,HEY1,IGFBP3,JUN,KITLG,MMP19,MYC,PDGFRA,RELA,RHOC,SLC7A11,SOCS3	377 (23)
SNCA		enzyme		-0.615	1.07e-08	ARHGEF4,BBC3,CCBE1,CD68,CHAC1,Chil3/Chil4,CHRNA6,CRHBP,DDIT3,DPP10,DUSP1,EMP1,EZR,FAM81A,GADD45A,GNG4,GSN,ITPKA,KCNIP4,KLF10,LDHB,LMNA,LRRC7,MICAL1,MMP9,Mx2,NCAM2,Nefm,NPTX1,NWD2,PLAUR,PRKCD,RPH3A,SCN7A,SERPINE1,SORCS3,TNFRSF4,TRIB3,TRIM47,TSC22D3,TUBB3,ZIC2	372 (22)
CD44		other		1.552	1.09e-08	CCL4,CCND1,CCND2,CD274,CD63,CD8A,CDKN1A,COL18A1,COL3A1,CRABP2,CTTN,DDIT3,GADD45A,IFITM2,IL1RN,ITGA3,ITGA5,JUN,LGALS3,LTBP1,MMP9,MYC,MYO1B,NOX4,PTP4A3,SPP1,THY1,ZYX	398 (18)
MAP3K1		kinase	Activated	3.65	1.1e-08	ATF3,CCND1,COL3A1,COL4A1,DUSP1,EGR1,FOS,HMOX1,HSPB1,JUN,PGR,PLAUR,RGS4,SERPINE1	359 (19)
GNA14		enzyme			1.11e-08	ADAMTS1,AKAP12,ANXA3,ATF3,BMP4,GADD45A,HSPB8,IL1RN,KLF6,LIF,NFIL3,PLAT,PLAUR,SPHK1,TNFAIP6,ZFP36L1
N-methyl-D-aspartate		chemical drug		0.519	1.11e-08	ATP2B3,BCL2L11,CALB1,EDN2,EGR1,FOS,GRIN2A,GRM1,INA,ITPKA,LIF,LIMK1,MYC,RELA,SLC7A1,SLC7A3	450 (22)
CREM		transcription regulator		0.631	1.2e-08	ATF3,CCND1,CCND2,CD8A,CEBPB,CH25H,COL3A1,CRABP2,CSRNP1,CYP51A1,DUSP1,EGR1,EGR2,FOS,GADD45B,HMGCR,HMGCS1,IDI1,INA,JUNB,MIDN,MSMO1,NFIL3,Sik1	443 (24)
aflatoxin B1		chemical - endogenous non-mammalian		0.343	1.34e-08	A2M,ATF5,CDKN1A,CFTR,CLDN1,EDNRB,ELAVL2,EZR,FGF1,GJA1,GNAI1,HLA-A,IDI1,IGFBP7,ITGA5,LAMA5,LPL,Muc1,NAP1L2,NEFL,Nefm,PHGDH,PHLDA3,PRMT2,PSAT1,RGS2,RHOC,SFRP1,SLC7A11,SPC25,SPP1,SRXN1,TRIM37,WFIKKN2	175 (7)
IFNAR1		transmembrane receptor	Activated	2.716	1.36e-08	ACOD1,ATF3,CCL4,CD274,CH25H,CLEC4D,CLEC4E,CMPK2,HLA-A,HMGCR,HMGCS1,IDI1,IFI44,IFIT3,IL27,LIF,MYC,PLAT,SDC1,SERPINE1,SLFN12L,SOCS1,SOCS3,TGM2	362 (18)
VDR		transcription regulator	Activated	2.173	1.39e-08	ARHGEF3,BMP7,CALB1,CCND1,CCND2,CDKN1A,CDT1,CEBPB,CLDN1,CLDN2,COL4A1,COL4A2,DSG1,EGR1,GADD45A,GADD45G,IGFBP3,IL1RN,JUN,LPL,MYC,MYD88,NR1H4,NUPR1,RELA,S100A9,SCD,SLC27A2,SOCS1,SOCS3,SPP1,ZYX	395 (23)
gentamicin C		chemical drug	Activated	3.357	1.47e-08	A2M,ADAMTS1,ANXA2,C4A/C4B,CACNG5,EFEMP2,EMP3,GPNMB,LGALS3,MYC,PLA1A,S100A10,SPP1,TES,TNFRSF12A
actinomycin D		biologic drug		-1.09	1.5e-08	AR,BBC3,BCL2L11,CCND1,CDKN1A,COL1A2,DUSP1,FLNA,FOS,FOSL2,GADD45A,GSTM5,HK1,HMOX1,HTR1A,JUN,LPL,Mt1,MYC,PLAUR,RELA,RGS2,RGS4,SERPINE1,SFRP1,SOCS3,SPHK1,SPP1,TNFRSF1B,VIP	418 (21)
IL1A		cytokine	Activated	3.386	1.52e-08	ADAMTS1,ATF3,BCL3,C4A/C4B,CCL4,CD274,CD83,CDKN1A,CYP11A1,FOS,FOSB,FOSL1,HDC,HMOX1,HSPG2,IL1RN,ITGA5,JUN,JUNB,KITLG,LIF,MMP9,MYC,RELA,S100A10,S100A9,SERPINE1,SPP1,SPRR1A,STAT3,VIP	380 (15)
ATF2		transcription regulator	Activated	2.641	1.67e-08	ANGPTL2,ATF3,CCND1,CD79A,COL24A1,DDIT3,DUSP1,DUSP8,EGR1,FOS,GADD45A,Hrk,JUN,NUPR1,PDGFRA,RELA,SULT4A1,TRIB3	385 (17)
JAG1		growth factor		1.369	1.69e-08	CCND1,CCND2,CDKN1A,CLDN1,CYP11A1,DUSP1,DUSP8,ESR1,GADD45A,GLI2,GPX3,HEY1,IGFBP3,MMP9,MYC,SPP1	358 (21)
sulindac sulfide		chemical drug	Activated	2.449	1.69e-08	ATF3,CCND1,CDKN1A,CEBPB,DDIT3,EGR1,ETNPPL,GADD45A,GADD45G,INSIG1,MSMO1,MTHFD2,PGR,STAT3,STC2,TUBA4A	372 (23)
nitric oxide		chemical - endogenous mammalian	Activated	3.446	1.74e-08	AHR,AR,ATF3,BBC3,CCND1,CDKN1A,CRH,CTSH,DDIT3,DUSP1,EGR1,FOS,GADD45A,GSTM1,HEY1,HMOX1,HSPG2,JUN,JUNB,MMP9,Mt1,MYC,SPP1,SQSTM1	372 (20)
EIF2AK3		kinase	Activated	2.943	2.03e-08	ATF3,ATF5,BCL2L11,CCND1,CD274,CEBPB,DDIT3,DERL3,EGR1,EIF4EBP1,FOSL1,GADD45A,JUN,MYC,NFIL3,NUPR1,PCK2,RAB6A,SHMT2,SLC1A4,SLC7A1,SQSTM1,TRIB3	417 (25)
PRKAA2		kinase		-0.865	2.03e-08	ACOT7,ASTN1,CDKN1A,DDAH1,DDIT3,EGR1,IFI44,KCNA2,KCNQ2,KLHL29,MMP9,NOX4,PARP3,PCOLCE,PDGFRA,PTPRN,SERPINI1,SOCS3,SORL1,TGM2,ZFP36L1,ZYX	330 (22)
TGFB2		growth factor		1.866	2.06e-08	AHR,BMP4,COL1A2,COL3A1,COL4A1,EGR1,EGR2,FMOD,FOS,HEY1,HMOX1,HSPG2,MMP9,PDK4,RUNX1,RUNX1T1,SCD,SERPINE1,SPHK1,SPP1	420 (21)
ADAM12		peptidase		1.563	2.07e-08	BRINP3,CEBPB,COL4A2,COL4A5,COL5A3,COL6A3,COLEC10,FBN1,IGFBP3,ITGA7,JUNB,LAMA5,LAMB3,NID2,OGN,SERPINE1	327 (13)
prexasertib		chemical drug	Activated	2.287	2.07e-08	ATF3,BCL3,BCL6,CDKN1A,CSRNP1,DDIT3,DUSP1,EGR1,EGR3,FOS,GADD45B,HMOX1,IFIT3,MMP9,MYC,SERPINE1	384 (21)
REST		transcription regulator		1.667	2.21e-08	CNTNAP1,CRH,EOMES,FGF12,GAP43,GRIN2A,GRM1,INA,KCNQ2,KIAA1549L,MYC,NCAM2,NEFH,Nefm,NELL1,Nes,NTRK3,POU4F1,PTPRN,SCN2A,SNAP25,TRPM2,TUBB3,VIP	233 (8)
Ca2+		chemical - endogenous mammalian		1.708	2.22e-08	ADCYAP1,AHR,AR,ATF3,CCND1,CCND2,CD83,CDK2,CDKN1A,CEBPB,CTTN,DDIT3,DUSP1,EGR1,FOS,FOSL1,FOSL2,GJA1,HDC,HMGCR,ITGA3,JUN,JUNB,KCND2,MMP19,MMP9,Nes,PLS3,PRSS12,S100A9,SERPINE1,SPP1,TRPC1,VIP	317 (18)
NRAS		enzyme		-1.079	2.25e-08	2810025M15Rik,AKAP12,ATF5,CCL4,CCND1,CD68,CDKN1A,COL1A2,CRABP2,CRYBG1,DDIT3,EGR1,ETV1,FBLN2,GJA1,HLA-A,IL1RN,LIMK1,MYC,PHLDA3,PLEKHO1,PTP4A3,RBPMS,SBNO2,SDC1,SPC25,STAT3,TMEM43	400 (21)
GPER1		G-protein coupled receptor	Activated	2.836	2.31e-08	ATF3,CCND1,CDKN1A,DDIT3,DUSP1,EDN2,EGR1,ESR1,FOS,FOSB,IER2,JUN,LTF,MYC,RND1	363 (21)
hexachlorobenzene		chemical toxicant	Activated	3.217	2.34e-08	A2M,ANXA2,C4A/C4B,CACNG5,EFEMP2,EMP3,GPNMB,LGALS3,MMP9,MYC,S100A10,SPP1,TES,TNFRSF12A	172 (7)
poly rI:rC-RNA		biologic drug		1.811	2.37e-08	1810058I24Rik,Abi3bp,ACOD1,ARID5A,ATF3,CCL4,CCND2,CD274,CD83,CDK14,CEBPB,CHN1,CLEC4E,CMPK2,DDX60,DUSP1,EGR1,ELAVL2,EZR,FOS,FOSL1,GADD45B,GBP6,GPR84,GRIN2A,HLA-A,IFI44,IFIT3,IL27,ITGA5,JUN,JUNB,KLF6,LIF,LIMK1,LPL,LTF,MMP9,MVP,Mx2,MYC,MYD88,NFIL3,NFKBIE,NOTCH3,PCK2,PIM1,PLAUR,PRKCD,PRKCQ,RELA,RGS2,SLFN12L,SOCS1,SOCS3,STAB1,TIRAP,TNFAIP6,ZC3HAV1	372 (15)
MMP9	-0.912	peptidase		1.24	2.4e-08	CCND1,CD274,CD68,CDKN1A,COL18A1,DDAH1,DDIT3,FOS,GADD45A,GAP43,GJA1,HTR1B,MDK,MMP9,MSTN,MYC,Nefm,PIM1,POU4F1,SDC1	426 (19)
Akt		group		1.562	2.41e-08	A2M,AR,BBC3,BCL2L11,BCL6,CCND1,CCND2,CD274,CD63,CDKN1A,CEBPB,COL3A1,EGR2,ESR1,FOS,FOSL1,GLI2,HIF3A,HMOX1,HSPG2,IL27,JUN,LAMB3,LMNA,LPL,MLXIPL,MMP9,MYC,NFIL3,NOX4,PDK4,PGR,RDH10,RELA,SCD,SERPINE1,SHH,SLC7A5,SOCS3,SPP1,UGT8	394 (20)
INS		other	Activated	2.67	2.49e-08	CCND1,CDKN1A,CEBPB,CRABP2,DDIT3,DUSP1,EGR1,EGR2,EIF4EBP1,FADS3,FOS,FOSB,FOSL1,FOSL2,HMGCR,IER2,IGFBP3,JUN,JUNB,LPL,NOX4,RDH10,SCD,TRIB3	372 (21)
lithium chloride		chemical drug		-0.285	2.58e-08	ACAT2,AHR,AR,BCL3,BMP4,BMP7,CCND1,CDKN1A,CYP51A1,FOS,HAPLN1,HMGCR,HMGCS1,HMOX1,IDI1,MAPK10,MYC,Neat1,NKD2,NOTCH3,PRKCD	366 (21)
PRKCD	0.372	kinase	Activated	2.137	2.62e-08	ALOXE3,CCND1,CD68,CDKN1A,CEBPB,COL1A2,DDIT3,FBN1,FOS,FOSL1,FOSL2,IL1RN,JUN,JUNB,KLF6,LAMB3,LIF,MMP9,MYC,PDLIM7,PTPN6,SERPINE1,SOCS1,SPHK1,STAT3,TRPC1	433 (18)
ITGA5	1.272	transmembrane receptor		0.215	2.72e-08	CCND1,CDK2,CDKN1A,CEBPB,ENPP2,FOS,GJA1,HOXB9,JUN,JUNB,MMP9,PLAUR,SHH	432 (24)
cigarette smoke		chemical toxicant	Activated	2.092	2.75e-08	AHR,CCND1,CDKN1A,COL4A2,DDIT3,EGR1,FOS,FOSL1,GADD45G,GPX3,GSTM5,HMOX1,IL27,JUN,MAFF,MMP9,MT-ATP6,Muc1,MYD88,NOX4,RAPGEF3,RELA,SERPINE1,SLC1A4,SOD3,SQSTM1,THY1,TTC3	382 (24)
F7		peptidase	Activated	2.904	2.77e-08	AR,CCND1,CLDN1,EGR1,FOS,FOSL1,GADD45A,IER2,LIF,MYC,PLAUR,RELA	335 (17)
tert-butyl-hydroquinone		chemical reagent		1.308	2.79e-08	ATF3,CHML,DDAH1,FLRT2,FOS,FOSL1,FOSL2,GADD45A,GBE1,GSTM5,HMOX1,JUN,JUNB,NEFH,OSGIN1,RAB6A,SERPINE1,SESN2	372 (17)
corticosterone		chemical - endogenous mammalian		-0.112	2.81e-08	ATP1B1,CALB1,CCND1,CDKN1A,CEBPB,COL1A2,COL3A1,CRH,CYP11A1,DDIT3,FOS,GLUL,HIF3A,JUN,LIF,MMP9,MYC,NOX4,PDK4,SCD,SFRP1,TGM2,TSC22D3,UCN	392 (25)
PGR	-0.724	ligand-dependent nuclear receptor	Activated	2.084	2.84e-08	ACOD1,ADAMTS1,AR,ATP1B1,BCL6,CCND1,CDKN1A,CEBPB,CRH,DDX60,ESR1,EZR,FOS,GAL,GLUL,GREB1,IFI44,IFIT3,MVP,MYC,MYO10,PGR,PRLR,PTP4A1,RAB27B,RASGRP2,RHOC,RUNX1,SDC1,SLC7A5,SNAP25,ST3GAL4,STAT3,TSC22D3	392 (25)
bleomycin		biologic drug	Activated	2.672	2.98e-08	ATF3,BMP4,CCND2,CD68,CDKN1A,Chil3/Chil4,COL1A2,COL3A1,FOSL1,FRZB,GADD45A,HEY1,IL27,KITLG,LGALS3,LTBP1,MAFF,MAP3K6,MMP9,MYC,PLA1A,PLAT,RELA,SERPINE1,SFRP1,Sik1,SOCS3,SPHK1,SPP1,SQSTM1,STAT3,TINAGL1,ZBTB10	444 (21)
SOCS1	1.081	other	Inhibited	-2.096	3.02e-08	A2M,ACOD1,CCND1,CCND2,CD274,CDK2,CDKN1A,Chil3/Chil4,DUSP1,FOS,GBP6,IFI44,IFIT3,JUN,Mx2,MYD88,RELA,Serpina3g (includes others),SOCS1,SOCS3,STAT3,TGM2	321 (16)
CD38		enzyme		1.342	3.16e-08	ANXA2,ATP1B1,BCL6,CCND2,EIF4EBP1,GADD45G,GBE1,GBP7,LGALS3,NFIL3,NOX4,PIM1,PSAT1,PYCR1,RASGRP2,RBPMS,SCEL,SDC1,Serpina3g (includes others),SLC7A5,SOCS1,SOCS3,THY1,TUBB2B	321 (12)
Mapk		group	Activated	2.424	3.34e-08	APLN,CCND1,CDKN1A,CEBPB,CHRNB4,EGR1,ESR1,FOS,GJA1,HMOX1,JUN,JUNB,MMP9,MYC,RELA,S100A10,SNCG,SPP1,TUBB3	377 (19)
potassium chloride		chemical drug		-0.39	3.34e-08	ATF3,ATP1B1,ATP2B3,BCL2L11,CALB1,COL3A1,DDIT3,EGR1,EGR2,FGF9,FOS,GRIN2A,Hrk,JUN,MYC,NPTX1,SLC7A1,SLC7A3,SPP1	311 (20)
NR5A2		ligand-dependent nuclear receptor	Activated	2.102	3.4e-08	ANXA2,CCL28,CCND1,CDKN1A,CEBPB,CYP11A1,CYP7B1,FOS,GADD45G,HMGCR,IL1RN,JUN,JUNB,MMP9,Mt1,MYC,NR1H4,PGR,RGS4,TNFRSF12A,TNFRSF1B	388 (21)
LEPR		transmembrane receptor		1.691	3.62e-08	ADCYAP1,ATF3,CD63,CD68,CDK2,COL4A1,DDIT3,EIF4EBP1,FOS,GADD45B,GADD45G,GAP43,GCKR,HMGCR,IGFBP3,IL1RN,LIF,LPL,MMP19,SERPINE1,SNAP25,SOCS3,STAT3,TNFRSF4,TSC22D3,VGF	369 (24)
PDX1		transcription regulator		1.425	3.62e-08	ANXA2,ATF3,ATF5,BBC3,CCND1,COL3A1,EGR1,EIF4EBP1,FGF1,GAP43,HK1,IGFBP3,INSIG1,JUN,JUNB,KLF10,KLF6,Mt1,MYC,PCSK2,PDE4B,PHGDH,PPP2R2C,PTP4A1,SPP1,TRIB3	372 (24)
EPO		cytokine	Activated	2.623	3.62e-08	APOBR,BCL2L11,BCL3,BCL6,BMP4,CCND2,CDKN1A,CLIC1,CRH,DDIT3,DHCR24,EGR1,FOS,FOSB,GLUL,Hrk,JUN,JUNB,MYC,NUPR1,PBXIP1,PIM1,PRKCD,PRKCQ,RCC2,RELA,Serpina3g (includes others),SHH,SOCS1,SOCS3,SPP1,ST3GAL4,STAT3,TSC22D3	321 (22)
docosahexaenoic acid		chemical drug		-0.328	3.63e-08	CCL4,CD83,CDKN1A,CEBPB,Chil3/Chil4,DDIT3,ELOVL6,FOS,HMOX1,LOXL1,MLXIPL,MMP9,MSTN,MYC,NOX4,PDE5A,PLAT,RELA,SCD,SDC1,SERPINE1,SOCS3,SORL1,SPHK1,TNFRSF1B	284 (20)
EZH2		transcription regulator		-0.754	3.67e-08	ATF3,BCL2L11,BMP4,BMP7,BMPR1B,CCND1,CCND2,CD63,CDKN1A,COL1A2,COL4A1,CYB5R2,EGR1,EOMES,EZR,FBLN1,FBN1,FRZB,GBX2,IGFBP3,KITLG,KRT6B,LAMB3,LYPD6B,MMP9,MYC,NIBAN1,NKD1,NKD2,NOX4,PCDH10,PCDH20,PDGFRA,PGR,RAB6A,Rian,RUNX1,S100A9,SHH,SLC7A11,SOCS1,SOCS3	358 (21)
TGFBR1		kinase		1.448	3.71e-08	AHR,BMP4,CCL4,CCND1,CDKN1A,COL1A2,EGR2,FBLN5,FGF9,FMOD,HEY1,HMOX1,IL1RN,LIMK1,LTBP1,MYC,MYD88,PDK4,RUNX1,SERPINE1	405 (21)
ACOX1		enzyme	Inhibited	-3.286	3.91e-08	ACOT2,ADAMTS1,ANXA2,CD63,CDKN1A,COL4A2,CYP26A1,CYP7B1,DDIT3,GADD45A,IL1RAP,KLF6,LGALS3,LPL,NUPR1,PDK4,RGS2,SLC27A2,SQSTM1,TAGLN2,TRIB3,UGT8	314 (13)
MYD88	0.463	other		1.516	3.96e-08	ACOD1,BCL3,BCL6,CCL4,CD274,CD83,CH25H,CLIC4,CMPK2,DUSP1,EDNRB,EGR1,FOS,HDC,HLA-A,HMOX1,IL1RAP,IL1RN,IL27,JUN,MAFF,MMP9,MYC,Nes,NFKBIE,NOX4,PDE4B,PIM1,POLA2,RELA,SERPINE1,SH3BP2,SOCS1,SOCS3,SPP1,TNFRSF12A	379 (14)
Vegf		group	Activated	2.487	3.99e-08	A2M,ACOT2,ADAMTS1,ADGRG1,AHR,AKAP12,ANGPTL2,APLN,ATF3,BCL2L11,BMP7,CALB1,CDK2,CLCF1,CLDN1,DDIT3,DOK5,EGR1,EGR2,EGR3,EMP1,ENPP2,FLNA,FOS,FOSB,FOSL1,HDC,HELLS,HMOX1,IGFBP3,INHBB,INSIG1,JUN,KITLG,MMP9,MYC,NID2,PCDH10,PDE7B,PDK4,PLAUR,PTPRR,RGS2,SFRP1,SHISA2,SLC7A1,SOCS3,STAT3	362 (20)
S100A8		other		0.232	4.06e-08	A2M,ADAMTS1,AKAP12,APLN,ATF3,BCL3,CCND1,CD274,COX6A2,ENPP2,FOSL1,HMOX1,LTBP1,MMP9,MYC,NR1H4,NTRK3,PRSS12,RAB20,ROBO2,SCUBE1,SHH,SOCS3,TKTL1,VGF	348 (19)
epigallocatechin-gallate		chemical drug		0.591	4.17e-08	AHR,AR,CCND1,CDKN1A,CEBPB,COL18A1,EGR1,ESR1,FOS,FOSB,FOSL1,FOSL2,GADD45A,GADD45B,GJA1,HMOX1,JAK3,JUN,JUNB,JUP,LTBR,MMP9,MYC,PGR,RELA,SERPINE1,SFRP1,SOCS1,STAT3	412 (19)
NFKB1		transcription regulator		1.871	4.25e-08	A2M,ADORA1,AR,BCL3,CCL4,CCND1,CCND2,CD274,CD83,CDKN1A,CFTR,Chil3/Chil4,COL1A2,DUSP1,EGR1,ENPP2,FOS,FOSB,GADD45A,GJA1,HMOX1,HTR1A,IGFBP3,IL1RN,KRT6B,LAMB3,MMP9,MYC,PIM1,PRKCD,PTPN6,RELA,SYTL1,TNFRSF4	343 (13)
LDL		complex	Activated	4.097	4.35e-08	ATF3,BCL2L11,CCL4,CCND1,CD68,CDKN1A,DDIT3,DUSP1,EDNRB,EGR1,EGR3,EMB,FOS,FOSB,GNAI1,HMGCR,HMOX1,IGFBP3,IL1RN,INSIG1,JUN,LAMB3,MMP9,PLAT,SERPINE1,SIPA1,SOCS1,SOCS3,SPHK1,SQSTM1,STAT3,TNFAIP6	422 (19)
PDGFB		growth factor	Activated	2.234	4.37e-08	BBC3,CCND1,COL1A2,COL3A1,EGR1,FGF1,FOS,HMGA1,IL1RN,MMP9,MYC,NOTCH3,SERPINF1,SPP1,STAT3	361 (21)
fenamic acid		chemical reagent	Activated	3.401	4.37e-08	A2M,ADAMTS1,ANXA2,C4A/C4B,CACNG5,EFEMP2,EMP3,GPNMB,LGALS3,MYC,PLA1A,S100A10,SPP1,TES,TNFRSF12A
SHH	-0.544	peptidase		1.493	4.47e-08	ADAMTS1,ATF5,BMP4,BMP7,BMPR1B,CCND1,CCND2,EBF1,GBX2,GLI2,HELLS,HEY1,HMGA1,MYC,NOX4,OTX1,PAX2,PDGFRA,PLAT,SERPINE1,SFRP1,SHH,SPP1,TSC22D3,TUBB3,ZIC2	322 (20)
H2AB3 (includes others)		other		1.941	4.59e-08	ATF3,ATF5,BBC3,BCL2L10,BCL2L11,CDKN1A,CHAC1,FOS,JAK3,LMO1,PCDH9,PRPH,TMEM151B	181 (7)
SU6656		chemical toxicant	Inhibited	-3.286	4.63e-08	ATF3,CCND1,DDIT3,EGR1,GFPT2,JUNB,Mt1,MYC,NFIL3,SOCS3,ZFP36L1	310 (20)
dibutyl phthalate		chemical toxicant	Activated	2.659	4.74e-08	AR,CYP11A1,FOS,INHBB,JUN,JUNB,MYC,RELA,SERPINE1,SPP1	416 (22)
homocysteine		chemical - endogenous mammalian		1.435	5.27e-08	ADM2,ANXA2,ATF3,CCND1,CDKN1A,DDIT3,EDN2,ELOVL6,FGF1,FOSL2,GADD45A,HMGCR,HMOX1,IDI1,LPL,MSMO1,SCD,SOCS3,TRIB3	308 (18)
Pdgf (complex)		complex	Activated	2.997	5.37e-08	CCND1,CCND2,CDKN1A,COL4A1,EGR1,FOS,FOSB,GJA1,HEY1,HMOX1,ITGA5,JUN,JUNB,MYC,NOTCH3,NOX4,PLAUR,SERPINE1	358 (19)
ID2		transcription regulator		-0.877	5.44e-08	BCL2L11,BCL3,BCL6,BMP7,CCND1,CCND2,CD79A,CD83,CDKN1A,CEBPB,DUSP1,EGR2,EOMES,GADD45B,GADD45G,INHBB,ITGA3,KLF6,MYC,Nefm,NFKBIE,OLFM4,RAPGEF4,RPRM,SDC1,SH2D1A,SOCS3,TNFRSF4	342 (23)
ID3		transcription regulator		-0.956	5.5e-08	ADGRG1,BCL2L11,BCL3,BCL6,BMP7,CCND2,CD79A,CD83,CDKN1A,CEBPB,DUSP1,EGR2,ELOVL6,EOMES,GADD45B,GADD45G,INHBB,KLF6,MMP9,MYC,RAPGEF4,RPRM,SDC1,SH2D1A,SOCS3,TNFRSF4	334 (23)
BCL6	0.437	transcription regulator	Inhibited	-2.397	5.51e-08	A2M,ACAT2,ALCAM,BCL3,BCL6,CCL4,CCND1,CCND2,CD274,CDKN1A,EGR3,FMOD,GADD45A,GSTM5,HAPLN1,HDAC9,ITGA3,JUNB,KLF6,LDHB,LITAF,LMNA,MYC,RGS4,SDC1,SERPINE1,SLC27A2,SOCS3,STAT3	404 (16)
valproic acid		chemical drug		0.513	5.54e-08	AR,ATF3,BCL2L11,CCND1,CCND2,CD83,CDKN1A,CH25H,COCH,CRH,CYP11A1,CYP39A1,CYP51A1,DDIT3,DPP10,ELOVL6,ESR1,FDFT1,GADD45B,GAP43,GLUL,GREB1,HAPLN1,HMGCS1,HMOX1,IDI1,JUN,LMO1,MAPK10,MSMO1,PLAT,PPP2R2C,PRAG1,PRKCD,PRMT2,SCD,SEMA3C,SERPINE1,SPP1,SQSTM1,STAT3,TES,TGM2,TSC22D3,TUBB3	393 (23)
FKBP10		enzyme	Inhibited	-2.138	5.93e-08	APLN,BCL3,COL18A1,COL1A2,COL3A1,COL6A3,MSTN,NOX4,SERPINE1,SOCS1,SPHK1,SPP1,THY1,TNFAIP6
indomethacin		chemical drug	Activated	2.413	5.97e-08	A2M,ADAMTS1,ANXA2,C4A/C4B,CACNG5,CCND1,CDKN1A,CEBPB,CLDN1,CRH,EFEMP2,EMP3,FOS,FRMPD4,GPNMB,HMOX1,LGALS3,LPL,MYC,PGR,PIM1,PLA1A,PLAUR,PRLR,S100A10,SDC1,SLC7A5,SPP1,TES,TNFRSF12A	416 (21)
5-azacytidine		chemical drug		1.706	6.26e-08	ANXA2,BBC3,CDKN1A,CLCF1,CLDN1,DUSP1,ESR1,FOSL1,GADD45A,KLF6,LDHB,MAFF,Mt1,MYC,MYO1B,NTRK3,PCDHA7,SHH,SLC3A2,SLC7A5,SOCS3,SOX11,SPHK1,TGM2,ZYX	327 (20)
lysophosphatidylcholine		chemical - other		-1.136	6.56e-08	CD274,CYP51A1,EGR1,FDFT1,GJA1,HMGCR,HMGCS1,HTR1A,INSIG1,JUN,LPL,MSMO1,PLAUR,RGS2,SCD,SERPINE1	400 (23)
glutathione		chemical - endogenous mammalian		0.302	6.57e-08	ATF3,BCL2L11,CCND1,CD274,CDKN1A,DDIT3,GFPT2,GPX3,HMOX1,IL27,MYC,SERPINE1,SLC7A11,STAT3,ZBTB10	383 (22)
CSF1R		kinase		1.757	6.66e-08	CCND1,CCND2,CDKN1A,FMOD,FOS,HMOX1,JUN,JUNB,MMP9,MYC,PGR,STAT3	355 (22)
cyclic AMP		chemical - endogenous mammalian	Activated	2.331	6.9e-08	ADCYAP1,AFAP1L2,CCND1,CCND2,CDKN1A,CEBPB,CRH,CYP11A1,DDIT3,EGR1,EGR2,FOS,FOSL2,GAP43,GJA1,IGFBP3,IL1RN,JUN,JUNB,MMP9,MYC,PDE4B,PGR,PRKAR2B,PRLR,RAPGEF3,SERPINE1,SOCS3,STAT3,UCN,VGF	299 (23)
fulvestrant		chemical drug		-1.499	7.16e-08	BMP4,CAST,CCND1,CDKN1A,CYP11A1,DHCR24,EGR1,EGR3,ESR1,FGF9,FOS,FOSL2,GADD45A,GAL,GJA1,GREB1,INHBB,JUN,KLF10,LPL,LTF,MYC,MYO1B,PGR,POLA2,SHH,SLC7A5,SNCG,SQSTM1,STAT3,TSC22D3,TUBA4A	423 (22)
IL3		cytokine	Activated	3.652	7.18e-08	ATF5,BCL2L11,CCND1,CCND2,CD63,CD83,CDKN1A,Chil3/Chil4,CTTN,DDIT3,EGR1,EGR2,EGR3,EMP3,FOS,FOSL2,GADD45A,GADD45B,GADD45G,HK1,HLA-A,Hrk,JUN,JUNB,LIF,Mt1,MYC,PHGDH,PIM1,Serpina3g (includes others),SLC3A2,SLC7A11,SLC7A5,SOCS1,SOCS3,TNFRSF4	306 (17)
IFNB1		cytokine		0.857	7.3e-08	ACOD1,CCL4,CD274,CD83,CDKN1A,CH25H,CLEC4E,CMPK2,FBLN2,FBN1,FOS,GBP6,GBP7,HLA-A,HMGCR,HMGCS1,IDI1,IFIT3,Ifitm1,IL27,MMP9,MYC,MYD88,NFKBIE,NID2,NPTX1,OGN,PDK4,SHH,SOCS1,SPP1,STARD4,TNFRSF4	315 (15)
F2R		G-protein coupled receptor	Activated	2.21	7.34e-08	BCL2L11,CCND1,DSP,DUSP1,EGR1,EGR3,ESR1,FOS,GJA1,HMOX1,IGFBP7,LAMB3,LDHB,MMP9,PGR,PLAT,PLAUR,TGM2	394 (19)
NPM1		transcription regulator	Activated	3.128	7.68e-08	CCL4,CEBPB,COL4A1,COL4A2,EDIL3,EGR1,EGR3,FAM110C,GJA1,HDAC9,HMOX1,IGFBP3,JUN,JUNB,KLF10,LIF,LTF,MMP9,PIK3CD,SEMA6A,SLC6A8,SYDE1,ZFP36L1	327 (18)
clopidogrel		chemical drug	Activated	2.878	8e-08	ALDH1L2,ATF3,CHAC1,DDIT3,EDN2,LAMA5,MYC,NUPR1,PCK2,PSAT1,SESN2,SLC1A4,SLC3A2,STC2,TRIB3
EOMES	-0.464	transcription regulator		-0.074	8.17e-08	ADCYAP1,ALCAM,BCL6,COL3A1,COL6A3,CYP26A1,EOMES,FRZB,GNAL,IGFBP3,NEFL,Nefm,PDGFRA,RGS2,ROBO2,SATB2,STAT3,ZCCHC12,ZIC2
Integrin		complex		1.609	8.34e-08	AHR,CCND1,ESR1,FOS,JUN,MMP9,MYC,SOCS3	343 (19)
C4BP		complex	Inhibited	-2.449	8.38e-08	CYP51A1,FDFT1,HMGCR,HMGCS1,IDI1,MSMO1	194 (7)
genistein		chemical drug		0.44	8.52e-08	A2M,ADK,AR,BCL3,CCND1,CD68,CD8A,CDKN1A,CFTR,CTSH,DUSP1,ESR1,FOLR1,FOS,GADD45A,HLA-A,HMGCR,HMOX1,Igkv1-117,JUN,JUNB,LPL,LTF,MMP9,Mt1,MYC,PGR,PIM1,PLAT,PRLR,PTPN6,RASGRP1,RELA,RPH3A,SERPINE1,SLC11A1,SOCS1,SPHK1,SPP1,SQSTM1	373 (19)
tyrphostin AG490		chemical drug		-1.256	8.57e-08	A2M,BMP7,CD274,CD68,CDKN1A,CFTR,CTTN,ENPP2,ESR1,FOS,MMP9,MYC,PIM1,S100A10,SOCS3,SPP1,SQSTM1,STAT3	374 (20)
PTGS2		enzyme		0.988	8.7e-08	ACOD1,ANXA2,BBC3,CCL4,CCND1,CD274,CD68,CDKN1A,DUSP1,EGR1,EZR,FOS,GRIN2A,HLA-A,IGFBP3,IRX1,IRX2,LPL,LTBP1,MMP9,MYC,NKD1,NKD2,PCDH7,STAB1,TGM2,TNFAIP6,TNFRSF12A	336 (17)
ADGRE2		other	Activated	2.111	8.83e-08	CCND1,CD274,CDKN1A,COL6A3,FOS,GLUL,GPNMB,HMOX1,JUN,LTBP1,MYC	160 (7)
wortmannin		chemical drug	Inhibited	-2.852	9.44e-08	AR,ATF3,BCL2L11,CCL4,CCND1,CCND2,CD274,CDK2,CDKN1A,COL1A2,COL3A1,DDIT3,DSG1,EGR1,ESR1,EZR,FOS,GAP43,HAPLN1,HMOX1,JUN,MMP9,MYC,PGR,SERPINE1,SOCS3,SQSTM1	367 (19)
carbamazepine		chemical drug	Activated	3.564	9.59e-08	ATF3,CEBPB,DDIT3,EIF4EBP1,MTHFD2,PSAT1,SHMT2,SLC7A1,SQSTM1,STAT3,STC2,TNFRSF12A,TRIB3	213 (13)
RUNX1	0.703	transcription regulator		0.061	9.64e-08	ADGRG1,ALCAM,ANXA2,ATF3,BBC3,BCL2L11,CCND1,CCND2,CD79A,CDKN1A,CYP11A1,DDIT3,EGR2,FOSL2,HAPLN1,IGFBP3,LMO1,MAP3K6,Mt1,MYC,MYH9,NFIL3,PCDH7,PIK3CD,PLXND1,PRKCQ,RUNX1,S100A9,SERPINE1,SPP1,STAT3	344 (21)
PARP1		enzyme		-1.365	9.68e-08	CCL4,CCND1,CD274,CD83,CDKN1A,COL3A1,FOS,GBP6,GBP7,HMOX1,JUN,LIF,MMP9,MYC,NELL2,NOTCH3,PVALB,RAPGEF4,RELA,SH3BP2,SOCS1	307 (16)
nitrofurantoin		chemical drug		1.239	1.08e-07	A2M,ADAMTS1,ANXA2,C4A/C4B,CCND1,DDIT3,GADD45A,GPNMB,GSTM1,HMGCR,HMGCS1,HMOX1,IGFBP3,LGALS3,Mt1,MYC,NR1H4,PLAT,S100A10,SDC1,SLC27A2,SPP1,TNFRSF12A
TMPRSS2-ERG		fusion gene/product	Inhibited	-2.061	1.11e-07	BBC3,CALB2,CEBPB,CHAC1,DDIT3,DUSP8,IFI44,LPL,MMP9,MYC,NUPR1,PCK2,PIM1,PLAT,PSAT1,SFRP1,SLC7A11,STC2,TRIB3,TSPAN2	370 (11)
SIRT1		transcription regulator		-0.943	1.15e-07	APLN,BBC3,CCND1,CCND2,CD63,CD83,CDKN1A,CEBPB,CMPK2,CRH,DDIT3,DDX60,ESR1,GADD45A,GBP6,GSTM1,GSTM5,HLA-A,HMGCR,HMOX1,IFI44,IFIT3,IL27,ITPKA,LGALS3,MMP9,MYC,NCAM2,NELL2,NFKBIE,NR1H4,PCK2,PCSK2,PDGFRA,PDK4,RELA,SERPINE1,SLC7A11,SOCS3,SOD3,STAT3,SYNPO	375 (18)
E. coli B5 lipopolysaccharide		chemical - endogenous non-mammalian	Activated	2.303	1.19e-07	ADAMTS1,BCL3,BCL6,CCL4,CCND1,CD274,CD83,CDKN1A,CYP11A1,DUSP1,FOS,HLA-A,HMOX1,IL1RAP,IL27,INHBB,JUNB,LIF,MLXIPL,MYD88,PDE4B,RELA,SDC1,SERPINE1,SOCS3,SPP1,STAT3,SUMO2,TGM2,TIRAP	270 (13)
WT1		transcription regulator		1.336	1.19e-07	CCND1,CDKN1A,CLIC1,CLIC4,COL4A1,EGR1,ESR1,EZR,FDFT1,FGF1,FOSB,GSN,HSPG2,IDI1,IL1RAP,IL1RN,IL27,JUNB,JUP,LGALS3,MMP9,MYC,NOTCH3,PAX2,PCK2,PLAUR,POU4F2,SDC1,SERPINE1,SQSTM1	413 (27)
GNRH		group	Activated	2.396	1.2e-07	ADCYAP1,ATF3,BMP7,DUSP1,EGR1,FOS,IGFBP3,JUN,SEMA3A,SRXN1,VGF	400 (23)
EPHB4		kinase		1.229	1.21e-07	AR,BMP4,BMP7,INA,KITLG,MYC,NCAM2,NEFL,Nes,PDLIM7,RUNX1,ZIC2,ZIC4
EDN1		cytokine	Activated	4.372	1.23e-07	APLN,CCND1,COL1A2,COL4A1,CYP11A1,EDNRB,EGR1,EZR,FOS,FOSB,FOSL1,GJA1,HEY1,ITGA5,JUN,JUNB,MARCKSL1,MMP9,MYC,PLAUR,PRKCD,SDC1,SERPINE1,SOCS1,SOCS3,TGM2	381 (20)
carbon tetrachloride		chemical toxicant	Activated	3.494	1.23e-07	ATF3,BCL2L11,CCL4,CCND2,CD68,CDKN1A,CEBPB,COL1A2,COL3A1,DDIT3,DUSP1,FOS,GADD45A,GADD45B,GSTM1,HMOX1,HSPB1,JUN,JUNB,MMP9,Mt1,MYC,NR1H4,PDGFRA,PTP4A1,RELA,SPHK1,SPP1,TNFRSF12A	387 (22)
CX3CL1		cytokine		0.207	1.24e-07	ADAMTS1,BMP7,Cd63-ps,CHRNB4,COL3A1,CRABP2,EFNB1,EOMES,ETV1,FRZB,GNB3,GPNMB,GSN,HMOX1,IFIT3,MMP9,OLFM4,SERPINF1,SNAP25,SPHK1,SPP1	340 (19)
diethylnitrosamine		chemical toxicant		0.184	1.32e-07	BCL2L11,CCND1,CCND2,CD63,CDKN1A,COL1A2,COL3A1,CYP26A1,CYP7B1,GSTM1,GSTM5,HMOX1,IL1RAP,JUN,LPL,Mt1,MYC,RELA,S100A9,SESN2,STAT3,THY1	387 (19)
EP300		transcription regulator		1.434	1.35e-07	AKAP12,AR,ARHGEF3,ARID5A,BBC3,BCL6,CCND1,CD274,CDK2,CDKN1A,COL1A2,CRABP2,CYP11A1,DUSP1,EGR1,EGR2,FOS,FOSL2,GREB1,HMGCR,HMOX1,JUN,JUP,LMNA,MYC,NTRK3,PDK4,PDLIM4,PGR,PIM1,PRKCD,PRLR,PSAT1,RAPGEF3,RAPGEF4,Rnf125,SCN4B,SDC1,SH2D1A,SLC7A11,SOCS3,SPHK1,TRHR	419 (22)
nickel		chemical toxicant		1.502	1.38e-07	ESR1,FOS,IL1RN,JUN,Mt1,NUPR1,PGR,PLAT,SERPINE1	313 (17)
EGR1	0.803	transcription regulator		1.776	1.43e-07	AR,ATF3,BCL2L11,CCL4,CCND1,CCND2,CDKN1A,COL1A2,EGR1,EGR2,EIF4EBP1,FOSL1,GADD45A,GADD45B,HMGCR,HMOX1,JUN,JUNB,MMP9,MYC,PCSK2,SERPINE1,SHH,SOCS1,SPP1	394 (19)
torkinib		chemical drug		0.216	1.49e-07	ADAMTS1,AHR,ARHGEF4,ATF3,BBC3,BCL6,CCND1,CDK2,DHCR24,EDN2,EGR1,EGR2,FOSL1,GJA1,GREM2,HMGCR,IL1RN,KIF14,KLF6,LIF,MTHFD2,PIM1,POLA2,ZBTB10	386 (21)
GATA4		transcription regulator		-0.917	1.53e-07	ACOD1,ADORA1,CCBE1,CCL4,CLDN1,CLDN2,CLSTN2,COL1A2,COL3A1,COX6A2,CRABP2,CYP11A1,DLX3,FOS,FRZB,GBX2,GJA1,HK1,INHBB,JUN,MYC,MYH9,OGN,PAX2,Serpina3g (includes others),SPP1,SPRR1A,TGM2,TNNT2,ZIC2
CSF2		cytokine	Activated	3.053	1.53e-07	BBC3,BCL2L11,BCL3,C4A/C4B,CCL4,CCND1,CCND2,CD63,CD83,CD8A,CDKN1A,Chil3/Chil4,CHST11,CLCF1,CLEC4E,DDIT3,EFEMP2,EGR1,EGR2,EGR3,FOS,FOSL1,HDC,HMGCR,HMOX1,IL1RN,JUN,JUNB,KCTD11,MMP9,MYC,PDE4B,PHGDH,PIM1,PLAUR,RELA,SLC7A11,SOCS1,SOCS3,SORL1,SPC25,SPHK1,SPP1,SQSTM1,TGM2,TNFRSF1B,TNFRSF4	401 (17)
SREBF1		transcription regulator		-0.238	1.57e-07	ADGRG1,AR,CDKN1A,CEBPB,Chil3/Chil4,CYP51A1,CYP7B1,ELOVL6,FDFT1,GPNMB,GPX3,HMGCR,HMGCS1,HMOX1,IDI1,INSIG1,KCNA2,LGALS3,LPL,MDK,MSMO1,MT-ATP6,NFIL3,NUPR1,PCK2,PLS3,SCD,SERPINE1,STARD4,TNFRSF1B,VGF	332 (17)
8-bromoguanosine 3',5'-cyclic monophosphate		chemical reagent		0.673	1.61e-07	CD8A,CDK14,CDKN1A,FOS,HMOX1,JUNB,MMP9,PLAUR,S100A10,SOD3,TAGLN2	313 (19)
triamcinolone acetonide		chemical drug		-1.435	1.64e-07	ATF3,BCL2L11,BMP4,BMP7,CRYBG1,DDIT3,DUSP1,EGR1,FOS,IER2,IGFBP3,INSIG1,JUN,JUNB,KLF10,MYC,RGS2,RUNX1,SCD,SEMA6A,SOX30,SPP1,STC2,TKTL1,TSC22D3,UGT8	323 (22)
IGF2		growth factor		1.913	1.68e-07	ARHGEF2,CCND1,CDKN1A,DDIT3,DUSP1,EGR1,EGR2,ELOVL6,GADD45A,HELLS,IER2,IFITM2,IGFBP3,ITGA5,JUNB,KIFAP3,MYC,OGN,PIM1,PRKCQ,SERPINE1,SOCS3,SPP1	387 (22)
LEP		growth factor	Activated	2.145	1.68e-07	AR,BMP4,CCND1,CD63,CD68,CDKN1A,CEBPB,Chil3/Chil4,COL3A1,COL4A1,COL6A3,CRH,CYP11A1,EGR1,EGR2,ELOVL6,ESR1,FOS,GADD45A,GAL,GAP43,HMGCR,IGFBP3,IL1RN,INSL3,JUN,JUNB,LIF,LPL,MLXIPL,MMP19,MSMO1,MYC,NOTCH3,PCSK2,PGR,PLAT,RELA,SCD,SERPINE1,SNAP25,SOCS3,SPP1,STAT3,VGF	419 (24)
MEF2D		transcription regulator		1.604	1.7e-07	CCND1,CDK2,CDT1,COL1A2,COL3A1,EGR2,FOS,FOSB,HDAC9,HMOX1,JUN,JUNB,SLC7A11,SOD3,SRXN1	177 (8)
CTNNBIP1		other		1.734	1.71e-07	CCND1,CDKN1A,CYP51A1,HMGCR,HMGCS1,IDI1,TUBB3	451 (22)
1-chloro-2-(2,2,2-trichloro-1-(4-chlorophenyl)ethyl)benzene		chemical toxicant		0.332	1.71e-07	AHR,CDKN1A,CYP7B1,GADD45A,GADD45B,LTF,PGR	294 (10)
E. coli serotype 0127B8 lipopolysaccharide		chemical - endogenous non-mammalian		1.633	1.83e-07	ADGRG2,ADORA1,CALB2,CCNO,CHST11,DDIT3,EDNRB,EGR2,FGF1,FGF12,GJA1,GLUL,HMOX1,LGALS3,LIF,MYD88,NOTCH3,P2RY1,PCK2,SLC7A11,SLC7A5,SOCS3,SOD3,STAT3	344 (13)
romidepsin		biologic drug		0.632	1.86e-07	BCL2L11,CCND1,CDKN1A,DDIT3,DUSP1,EGR1,ESR1,FOS,GADD45G,GSN,JUN,MMP9,MYC,PLAUR,RHOC,TNFAIP6	351 (21)
salmonella minnesota R595 lipopolysaccharides		chemical - endogenous non-mammalian	Activated	2.858	1.88e-07	ACOD1,BCL3,CCL4,CD83,CH25H,CMPK2,EDNRB,EGR1,FOS,FOSB,FOSL1,JUN,JUNB,MAFF,Nes,PDE4B,SERPINE1,SLFN12L,SOCS3	357 (19)
bee venom		chemical - endogenous non-mammalian		0.177	1.88e-07	ACOD1,DDIT3,EHD1,FOSB,GADD45A,GPR84,HSPB1,ITGA5,ITPKC,JUN,JUNB,MYH9,NFIL3,NUPR1,RGS2,SLC7A11,SOCS3	270 (8)
TP73		transcription regulator		1.907	1.89e-07	ATF3,BBC3,BCL2L11,BMP7,CD83,CDH10,CDK2,CDKN1A,COL18A1,DDIT3,EGR1,FKBP1B,GADD45A,GJA1,GPNMB,GPR176,GSN,HIC1,HSPB8,IGFBP3,ITGA5,LAMA5,LDHD,LIMK1,LTBP1,MDK,MMP19,MYC,MYH9,NOTCH3,NUPR1,PARVG,PRAG1,PTP4A3,RFX2,RPRM,RUNX1,SERPINE1,SERPINF1,SPP1,THY1,TNFRSF12A,TNFRSF1B,UCN,WNT10A	389 (21)
ADRA1D		G-protein coupled receptor			1.91e-07	CDK2,CEBPB,COL3A1,DDAH1,DUSP1,EGR1,EGR2,FOS,JUN,LIF,POLA2,STAT3	352 (21)
dextran sulfate		chemical drug	Activated	2.238	1.94e-07	ADAMTS1,AHR,BMP4,C4A/C4B,CCL4,CCND1,CD83,CDKN1A,CLDN1,CLDN2,COL18A1,EFEMP2,ENPP2,FGF1,GLI2,GSTM5,HMOX1,KCTD11,MMP9,MYC,OLFM4,PHGDH,PTP4A3,RELA,S100A9,SDC1,SERPINE1,SOCS3,SPC25,SPHK1,STAT3,TGM2,TNFRSF1B,WNT10A	325 (15)
IL17A		cytokine	Activated	2.736	1.98e-07	BCL3,CCL4,CCND1,CD274,CD68,CD83,CEBPB,COL3A1,CTTN,CYP7B1,EDIL3,EGR2,FOS,FOSL1,GADD45A,HSPB8,IL1RN,IL27,JUN,LIF,LPL,MLXIPL,MMP9,MYC,PLAT,PTGFR,S100A9,SERPINE1,SOCS1,SOCS3,SPP1,STAT3,TNFRSF1B	357 (15)
TSH		complex	Activated	3.356	2.08e-07	CCND1,CDK2,CDKN1A,EGR1,FOS,GNAI1,IGFBP3,IL1RN,JUNB,Mt1,MYC,NOX4,SOCS1,SOCS3	366 (24)
tunicamycin		chemical - endogenous non-mammalian	Activated	3.218	2.15e-07	ATF3,ATF5,AVIL,BBC3,CCND1,CDKN1A,CEBPB,CHAC1,DDIT3,DERL3,EGR1,EIF4EBP1,GADD45A,GADD45B,HAPLN1,HMOX1,MLXIPL,MMP9,MYC,NFIL3,PCK2,RAB6A,RIPK1,SCD,SDC1,SESN2,SHH,SLC7A1,SLC7A11,SOCS3,TRIB3	309 (19)
filgrastim		biologic drug		0.047	2.17e-07	ANXA3,ATF3,CAST,CCL4,CD83,CLEC4D,CRYBG1,EGR2,EGR3,F5,GADD45A,GPR84,HEY1,HMGA1,IFI44,IFIT3,IL1RAP,ITPKC,JUN,KLF6,LAMB3,LDHB,LGALS3,MAFF,MMP9,MVP,MYO10,NFKBIE,NMNAT2,OLFM4,PDE4B,PLAUR,PRKAR2B,RAB37,S100A10,SOCS1,SPP1,SQSTM1,TRPM2,TST,ZFP36L1
15-deoxy-delta-12,14 -PGJ 2		chemical - endogenous mammalian		0.941	2.32e-07	CCND1,CCND2,CDK2,CDKN1A,COL1A2,DDIT3,DNMT3B,EGR1,ESR1,FOS,GADD45A,GAL,GBX2,GSN,HMOX1,HSPB1,IFITM2,JUN,MMP9,MYC,Nes,NOX4,PDGFRA,SERPINE1,SOCS1,SOCS3,SPP1,TUBB3	270 (20)
RNA polymerase II		complex			2.33e-07	ARID5A,CCND2,CD83,CDKN1A,COL1A2,DDIT3,DUSP1,ESR1,FOS,FOSL1,FOSL2,GADD45A,GADD45B,GBP7,IGFBP3,IL1RN,ITGA5,JUN,JUNB,KITLG,MMP9,Mt1,MYC,NR1H4,OSGIN1,PRLR,RPRM,SLC27A2,SOCS3,SPP1,TNNT2	337 (17)
vorinostat		chemical drug		1.077	2.33e-07	ADAMTS1,AR,BBC3,BCL2L11,CCND1,CCND2,CD8A,CDK2,CDKN1A,CLDN2,CYP51A1,DDIT3,DUSP1,EGR1,ELOVL1,HMGCR,HMGCS1,IDI1,JUN,LGI1,LTBR,MMP9,MYC,PTP4A3,RELA,RGS2,S100A9,SEMA3A,SOCS1,SOCS3,SULT4A1	371 (18)
atorvastatin		chemical drug		-0.834	2.37e-07	CCBE1,CYP51A1,DDIT3,DHCR24,DUSP1,EGR1,FDFT1,FOS,FOSB,GADD45B,GJA1,GLI2,HMGCR,HMGCS1,HMOX1,IDI1,JUN,JUNB,LPL,MMP9,MSMO1,NOX4,PLAT,SERPINE1,SOD3,SPP1,TSC22D3	338 (19)
glutamine		chemical - endogenous mammalian		-1.263	2.38e-07	ATF5,BCL2L11,CCND1,CD274,CDKN1A,CEBPB,DDIT3,DUSP1,FOS,GADD45A,HK1,JUN,JUNB,LIF,MYC,PCK2,PYCR1,TUBB4A	392 (23)
COP1		enzyme		-0.327	2.44e-07	ACOD1,AR,CDKN1A,CEBPB,EGR3,ESR1,FOS,GJA1,GPNMB,GREB1,HSPB8,Ifitm1,PGR,SLFN12L,TRIB3	400 (21)
staurosporine		chemical drug		-1.182	2.44e-07	BBC3,CCL4,CCND1,CDKN1A,CFTR,COL1A2,CYP11A1,FOS,FOSL1,HDC,HMOX1,IL1RAP,INHBB,KLF10,MMP9,MYC,PIM1,PLAT,SERPINE1	330 (19)
triamterene		chemical drug	Activated	3.043	2.53e-07	A2M,ADAMTS1,ANXA2,C4A/C4B,EFEMP2,EMP3,GPNMB,LGALS3,MYC,PLA1A,S100A10,SPP1,TES,TNFRSF12A
lysophosphatidic acid		chemical - other	Activated	2.621	2.55e-07	BCL6,CCL4,CCND1,DUSP1,EGR1,FOS,JUN,JUNB,LIF,LPL,MMP9,MYC,PDGFRA,PLAUR,SERPINE1,SOCS1,SPHK1	370 (19)
LAMA4		enzyme	Inhibited	-2.668	2.55e-07	ACVRL1,CCND1,CCND2,COL3A1,COL4A6,COL6A3,GSTM1,GSTM5,IL1RAP,ITGA7,KITLG,LAMA5,MGST3,PDGFRA,SIPA1,SPP1,TNFRSF1B
CYP1A1		enzyme		0.447	2.55e-07	ANXA3,CACHD1,CCND1,CTTN,CYP26A1,HOXB9,KITLG,LMNA,Mt1,MYO10,NEFL,PRPH,PTP4A1,PTP4A3,SDC1,ST3GAL4,TNNT2
isoproterenol		chemical drug	Activated	2.122	2.57e-07	APLN,ATF3,BCL2L11,BVES,CD68,COL3A1,Cyp4f16/Cyp4f37,CYP4F8,FOS,FOSL1,FOSL2,HMOX1,INA,JUN,JUNB,LGALS3,LIF,LPL,MMP9,PLAT,RAB27A,SCD,TUBB3	452 (22)
DRD2		G-protein coupled receptor	Activated	2.21	2.58e-07	CD63,EDNRB,FOS,FOSB,FOSL2,IGFBP3,JUN,LTBP1,MYD88,NAT8L,PCSK2,PRLR,PVALB,RELA,SERPINE1,TUBB6	358 (26)
FN1		enzyme		1.705	2.61e-07	CCL4,CCND1,CD79A,CD83,CD8A,CDKN1A,CEBPB,CHRNB4,CLIC4,DHCR24,FLNA,FOS,HK1,ITGA5,MMP9,MYC,PDGFRA,PGR,PLAUR,SDC1,SERPINE1,SOCS3,SPP1,SQSTM1,TGM2,ZYX	382 (17)
ALDH2		enzyme	Inhibited	-3.148	2.81e-07	ATF5,MTHFD2,PHGDH,PSAT1,SHMT2,SLC1A4,SLC3A2,SLC7A11,SLC7A3,SLC7A5
PP1		chemical drug		-1.723	2.83e-07	BCL2L11,CCND2,CDK2,ESR1,FOS,GJA1,HMOX1,IL1RN,JUN,MYC,SERPINE1	339 (19)
NORAD		other	Activated	2.72	2.83e-07	CHST11,COL4A1,COL4A2,DDIT3,GADD45B,IGFBP3,JUN,JUNB,PHLDB1,SDC1,TNFRSF12A	197 (7)
NFKB2		transcription regulator		0.387	2.85e-07	AR,BACE2,BCL2L11,BMP4,CCND1,CD83,CDKN1A,COCH,CRH,ENPP2,FOS,GRIN3A,MARCKSL1,MMP9,MYC,PDGFRA,PLD5,RELA,Serpina3g (includes others),WNT10A,ZFP36L1	357 (15)
sphingosine-1-phosphate		chemical - endogenous mammalian	Activated	3.333	2.85e-07	AHR,ANXA2,CCND1,CD83,COL3A1,EGR1,ENPP2,FAM167A,FOS,GAP43,IL27,JUN,MMP9,MYD88,Nefm,NOTCH3,NSG2,PRPH,SERPINE1,SPHK1,ST8SIA2	281 (19)
hydrocortisone		chemical - endogenous mammalian		-0.647	2.9e-07	CCND1,CCND2,CEBPB,COL1A2,CRH,EZR,FGF9,GABBR2,GADD45B,GAP43,GLUL,IGFBP3,IGFBP7,LPL,Mt1,PLAT,PRLR,SEMA6A,SERPINE1,SFRP1,STC2,TSC22D3	425 (21)
SNAI1		transcription regulator		-1.234	2.9e-07	BMP4,CCND1,CCND2,CDK2,CDKN1A,CLDN1,COL1A2,CTTN,DDR2,FLNA,FLNC,FOS,FOSL1,GLI2,GSN,LIF,MLXIPL,MMP9,SDC1,SERPINE1,SLC27A2,THY1	419 (22)
PRKCE		kinase		0.911	2.9e-07	CCND1,CDKN1A,CEBPB,CHRNA6,CHRNB3,EGR1,FOS,JUN,JUNB,KCNC4,MMP9,MYC,PIM1,RGS2,STAT3	312 (19)
SCD	-0.459	enzyme	Inhibited	-2.095	3.03e-07	AR,ATF3,CEBPB,CRABP2,DDIT3,DHCR24,EGR1,ELOVL1,ELOVL6,FOS,GADD45A,HMGCR,HMGCS1,IL1RN,JUN,KRT6B,LPL,MLXIPL,PDK4,RDH10,S100A9,SGPP2,SOCS3,SPP1	365 (22)
ERBB4		kinase		-0.51	3.03e-07	CCND1,CDKN1A,COL3A1,DDIT3,DUSP1,EGR1,FBLN2,GADD45A,GAP43,GJA1,HMOX1,JUN,MYC,PGR,SFRP1,SOCS3	371 (18)
CASR		G-protein coupled receptor		1.342	3.06e-07	ARHGEF3,BMP7,CCND1,CCND2,CDT1,COL4A1,COL4A2,DSG1,EGR1,GABBR2,GADD45A,GADD45G,IGFBP3,LPL,MYD88,NUPR1,RELA,S100A9,SOCS3,ZYX	397 (23)
H-[1,2,4]oxadiazolo[4,3-alpha]quinoxalin-1-one		chemical reagent		0.895	3.09e-07	CD83,CD8A,CDK14,CDKN1A,FOS,HMOX1,MMP9,PLAUR,SOD3	321 (20)
Z-LLL-CHO		chemical - protease inhibitor	Activated	3.476	3.31e-07	AHR,AR,ATF3,BBC3,BCL2L11,CCND1,CCND2,CDKN1A,CDT1,CEBPB,CLIC1,DDIT3,DDR2,DUSP1,DUSP8,EIF4EBP1,ESR1,FOS,GNAI1,HMOX1,HSPB1,JUN,MMP9,MYC,NOTCH3,NOX4,PDGFRA,PGR,PRLR,PTGFR,PTPN6,RGS4,RIPK1,SOCS3,SQSTM1,TUBB4A	353 (20)
Cd2+		chemical toxicant		1.982	3.31e-07	CCND1,DDAH1,DDIT3,FOS,HMOX1,Mt1,MYC	382 (20)
SP3		transcription regulator		0.891	3.43e-07	AKAP12,ATF3,CCND1,CDKN1A,COL1A2,CYP26A1,CYP51A1,CYP7B1,DLX3,DUSP1,EGR1,ESR1,FOS,FOSL1,IGFBP3,JUN,LPL,PGR,PLAUR,PRKCD,PRLR,RASGRP2,RELA,SERPINE1,STAT3,TNFRSF4	387 (20)
WNT1		cytokine	Activated	2.316	3.45e-07	BMP4,CALB2,CCND1,CCND2,CDKN1A,COL3A1,EFNB1,EGR1,EIF4EBP1,ENPP2,FOS,GADD45G,JUN,JUNB,KRT6B,MYC,NOTCH3,SEMA3C,SERPINE1,SPP1	395 (21)
phenylbutazone		chemical drug	Activated	2.661	3.61e-07	A2M,ADAMTS1,ANXA2,C4A/C4B,CACNG5,CCND1,EFEMP2,GPNMB,LGALS3,PLA1A,S100A10,SPP1,TNFRSF12A	233 (7)
glucocorticoid		chemical drug		-0.113	3.63e-07	AHR,APLN,BCL2L11,BCL3,CDKN1A,CEBPB,CRH,CYP11A1,DDIT3,DUSP1,FBLN1,FBLN2,GLUL,GPX3,HMOX1,HTR1A,IGFBP3,IL1RN,JAK3,LAT2,LPL,MMP9,Mt1,MYC,OGN,PLAT,RESP18,SERPINE1,SOCS3,SPP1,TSC22D3,UCN	396 (24)
selumetinib		chemical drug		-0.311	3.69e-07	BCL2L11,CCND1,CD274,CDKN1A,DDR2,FOS,FOSB,FOSL1,FOSL2,GPNMB,JAK3,JUN,JUNB,LAMB3	354 (21)
bromobenzene		chemical toxicant		1.727	3.69e-07	CDKN1A,DDIT3,FDFT1,FOS,GADD45A,GSTM1,HMGCS1,HMOX1,HSPB1,JUN,MSMO1,Mt1,MYC,TUBB2B
DACH1		transcription regulator		-1.718	3.71e-07	BMP4,CDKN1A,EGR1,FOS,IER2,IGFBP3,JUN,PLAT,SERPINE1,SOCS3,STC2	436 (23)
chloropromazine		chemical drug		0.33	3.71e-07	ACAT2,CD83,FDFT1,FOS,HMGCR,HMGCS1,IDI1,MSMO1,PLCB1,SCD,TSC22D3
cardiotoxin		chemical - other	Activated	2.887	3.85e-07	APLN,BRINP3,CCL4,CCND1,CCND2,COL1A2,CTSH,DHH,EDNRB,EZR,FGF12,FGF9,GSN,IGFBP3,IGFBP7,IL1RN,ITGA5,LIF,LTBP1,LTF,MSTN,MYH9,S100A9,SERPINE1,SERPINF1,SPP1,STAT3,TNFRSF1B
PPP1R13L		transcription regulator		0.707	3.9e-07	BBC3,CCND2,CDKN1A,CLDN1,DSP,GJA1,ITGA3,JUP	220 (11)
HOXD3		transcription regulator		0.822	3.9e-07	DSG1,DSP,IGFBP3,ITGA5,JUP,SDC1,SERPINE1,TGM2
POU5F1		transcription regulator		0.802	3.98e-07	AHR,BAG3,BCL2L10,BCL2L11,BMP4,BMPER,CCND1,CD274,CD63,CDKN1A,CRABP2,CYP26A1,DLX3,DNMT3B,DSP,DUSP1,EOMES,FRZB,GADD45A,GADD45G,GBX2,GLI2,GREB1,LOXL1,MMP9,MYC,OTX1,PCDH18,PDGFRA,POU4F1,SLC11A1,SOCS3,SPP1,SPRR1A,Sprr2g,TEAD2,WLS,ZIC2	402 (16)
CD40LG		cytokine	Activated	2.497	3.98e-07	AHR,ALCAM,ATF3,ATF5,BCL6,CAST,CCL4,CD63,CD83,CD8A,CDKN1A,Chil3/Chil4,DUSP1,EGR1,FOS,FOSB,FOSL2,GADD45A,IFI44,IFIT3,IL1RAP,IL27,JUN,JUNB,MARCKSL1,MYC,NEFH,NFKBIE,PIM1,PLAUR,RELA,RGS2,SERPINE1,SOCS1,STAT3,TGM2,TNFAIP6,ZFP36L1	360 (16)
DUSP1	0.357	phosphatase		-1.199	4.01e-07	ACVR1C,CCL4,CH25H,CMPK2,COL3A1,DDX60,DUSP1,FOSL1,IFI44,IFIT3,IL1RN,JUN,LTF,Mx2,PLAT,PLAUR,S100A9,SERPINE1,SOCS1,SOCS3,SYNPO	299 (20)
SYK		kinase		-0.006	4.12e-07	AKAP12,ARID5A,BCL2L11,BMPR1B,CCL4,CCND1,CFTR,FOSL1,GADD45A,PCMTD1,PIM1,PRKAR2B,PRKCQ,RASSF4,RELA,SHH,TRHDE,TSC22D3	355 (20)
ERBB3		kinase		0.432	4.12e-07	CCND1,CCND2,CDKN1A,DUSP1,EGR1,EZR,FBLN2,FBN1,HMOX1,IER2,MATN2,PHGDH,Serpina3g (includes others),SERPINE1,SFRP1,SOCS3,TGM2,TNNT2	407 (22)
bortezomib		chemical drug		0.1	4.28e-07	AR,ATF3,BAG3,BCL2L11,CCL4,CCND1,CCND2,CDK2,CDKN1A,Chil3/Chil4,DDIT3,ESR1,GADD45A,GADD45B,GPNMB,GREB1,IGFBP3,LIF,LTBR,MYC,NOX4,PGR,SDC1,SH3BP2,SLC25A37,SQSTM1,SRXN1,TRIB3,TSC22D3	400 (22)
Z36		chemical reagent	Activated	2.345	4.47e-07	BBC3,CDKN1A,CEBPB,CHAC1,DDIT3,HMOX1,INSIG1,NUPR1,TRIB3	140 (7)
Mt1	0.472	other		-1.026	4.47e-07	ATF3,CCND1,FOS,JUN,LPL,Mt1,MYC,RELA,SERPINE1	397 (20)
MAPK14		kinase		1.29	4.49e-07	ATF3,CCND1,CD83,CYP51A1,DUSP1,FOS,FOSL2,GADD45A,GJA1,GRIN2A,HMGCR,HMOX1,IL27,JUN,JUNB,KITLG,MMP9,PLAUR,S100A9,SLFN12L,SOCS3,SPHK1,SPP1,SPRR1A,TGM2,VIP	383 (17)
5-N-ethylcarboxamido adenosine		chemical reagent		0.75	4.7e-07	BAG3,BCL3,COL1A2,EGR1,EGR2,GADD45A,HMOX1,IER2,IFIT3,JUNB,KCNA2,KLF6,NFIL3,PDE5A,RGS2,SERPINE1,SOCS3,SRXN1	376 (18)
l-asparaginase		biologic drug	Activated	3.334	4.7e-07	ALDH1L2,ATF5,CDKN1A,CYP51A1,DDIT3,HMGCR,HMGCS1,IDI1,INSIG1,MSMO1,MTHFD2,NIBAN1,NUPR1,PHGDH,PSAT1,RHOC,SPC25,TRIB3	51 (3)
6,7-dinitroquinoxaline-2,3-dione		chemical reagent	Activated	2	4.85e-07	EGR1,FOS,FOSB,JUN,JUNB	251 (12)
inosine		chemical - endogenous mammalian	Activated	2.892	4.91e-07	A2M,ALCAM,ANXA2,C1QC,C4A/C4B,CD63,CD68,EIF4EBP1,EMP3,GAP43,Mt1,RHOC
ADRA1A		G-protein coupled receptor			4.91e-07	CDK2,CEBPB,COL3A1,DDAH1,DUSP1,EGR1,EGR2,FOS,JUN,LIF,POLA2,STAT3	376 (25)
IKBKG		kinase	Activated	2.177	4.91e-07	ACOD1,BBC3,CEBPB,CH25H,CYP7B1,ENPP2,FOS,HLA-A,IL1RN,JUNB,KCND2,Mt1,OGN,PCDH7,SEMA3C,SFRP1,SOCS3,SOD3,TNFRSF1B,TRPC1	348 (16)
MECP2		transcription regulator		0.187	4.92e-07	B3GALT5,CALB2,CRH,EGR1,ESR1,ETNPPL,FRZB,GABBR2,GRIN2A,IGFBP3,INA,JUNB,LMNA,Mt1,MYC,NEFH,Nefm,PCDH10,PLS3,RPH3A,SCN2A,SCN4B,SEMA3D,SYT2	340 (17)
OGA		enzyme		0.685	4.98e-07	ADGRG2,CALB1,CCBE1,CCND1,CD68,CDK2,CDKN1A,CEBPB,CH25H,CLDN1,CREG2,EFNB1,EGR2,FBLN1,FDFT1,FGF9,FLNA,GADD45A,GADD45G,GLUL,GRIN3A,GSN,HMGCR,HMGCS1,IFIT3,IGFBP3,IGFBP7,IGFBPL1,JUN,LIF,MSMO1,MYO10,RAB27A,SLFN12L,SOCS1,SOCS3,STARD4,TNFRSF12A,TUBA4A	397 (26)
CpG oligonucleotide		chemical drug		1.42	5.25e-07	AHR,CCL4,CD274,CD63,CD83,CEBPB,CLEC4D,CLEC4E,DDX60,DUSP1,EGR1,GBP6,GPR84,IFIT3,MYC,MYD88,PHGDH,PRKCD,RASSF4,RELA,SDC1,SERPINE1,SLC7A5	355 (17)
JUNB	1.238	transcription regulator	Activated	2.163	5.58e-07	ACAT2,ATF3,BCL3,CCND1,CD274,CD68,COL1A2,DUSP1,FBLN2,FBLN5,FOSL1,HMOX1,Hrk,JUNB,LAMB3,MMP9,PIM1,PLAUR,SCD,SERPINE1,SLC7A1	387 (17)
SMAD7		transcription regulator	Inhibited	-2.28	5.58e-07	BCL2L11,BMP7,BMPR1B,CDKN1A,COL1A2,COL3A1,COL6A3,DNMT3B,EIF4EBP1,GADD45A,HDAC9,HMOX1,ITGA7,MATN2,MMP9,MYC,NID2,PLAT,RELA,SCD,SERPINE1	328 (19)
cytokine		group	Activated	3.076	5.58e-07	BCL3,CCND1,CRH,DDIT3,DUSP1,EGR1,FOS,HMOX1,JUN,LIF,MMP9,MYC,PLAT,PLAUR,PRPH,SERPINE1,SOCS1,SOCS3,STAT3,TNFAIP6,TNFRSF1B	352 (19)
ERK1/2		group	Activated	2.536	5.6e-07	APLN,BCL2L11,CCL4,CCND1,CCND2,CDKN1A,CEBPB,COL3A1,DDIT3,DUSP1,EGR1,ESR1,EZR,FOS,FOSB,FOSL1,GJA1,HLA-A,HMGA1,IGFBP3,ITGA3,JUN,JUNB,MMP9,MYC,NOX4,PDGFRA,PLAUR,RHOC,SERPINE1,SOCS3,SPP1	397 (20)
MYOD1		transcription regulator		1.359	5.8e-07	ADORA1,BCL6,CDK2,CDKN1A,COL4A1,CYP2S1,DUSP1,ENPP2,ESR1,FOSL1,GADD45A,GADD45G,GREM2,HSPB8,IRX1,ITGA7,JUNB,KIF14,KLF6,LIF,Nes,NPTX1,PLEKHO1,PRKAR2B,RUNX1,SUSD2,TEAD2,TNNT2	336 (20)
Igkv1-117	1.756	other			5.88e-07	CCND2,CDKN1A,FOSL2,JUN,JUNB,MYC	289 (20)
STAT5a/b		group		0.826	5.9e-07	AHR,BCL2L11,BCL6,CCND1,CCND2,CDKN1A,Chil3/Chil4,DUSP1,EBF1,EMP1,FOS,IDI1,MYC,MYD88,NETO2,PDE4B,PIM1,SOCS1,SOCS3	259 (20)
DDIT3	0.485	transcription regulator		1.359	5.9e-07	ATF3,ATF5,AVIL,BBC3,BCL2L11,DDIT3,DDR2,HMOX1,KRT6B,MTHFD2,NFIL3,PCK2,PLAT,RGS4,SOX30,STAT3,TGM2,TRIB3,TSC22D3	364 (15)
KLF5		transcription regulator		-0.456	6.03e-07	CCND1,CDKN1A,CDT1,CSRNP1,DUSP1,EGR2,JUN,LITAF,MAFF,MMP9,MYC,NIBAN2,NR1H4,RUNX1,S100A9,WNT10A,ZFP36L1	384 (21)
AICAR		chemical - endogenous mammalian		1.564	6.1e-07	BBC3,CCND1,CDKN1A,CEBPB,COL3A1,CYP11A1,GPX3,GSTM5,MMP9,MSTN,PDK4,SCD,SERPINE1,SESN2,SOCS3,SOD3,SQSTM1,SRXN1	365 (22)
TET2		enzyme	Activated	2.683	6.22e-07	ANXA2,APOBR,BCL2L11,BCL3,CHST11,CLEC4D,CMPK2,CYP2S1,FOSL2,IFIT3,Ifitm1,MAFF,NIBAN1,NIBAN2,PAX2,PLS3,RUNX1,SLC16A12,SLC6A8,SORL1,TNNT2
AIRE		transcription regulator		1.89	6.93e-07	ACOD1,BMP4,C4A/C4B,CALHM6,CD274,CLEC4E,DDX60,GBP6,GPR84,IFI44,IFIT3,LTF,MARCKSL1,MMP9,NFKBIE,PDE4B,S100A9,SLC7A11	190 (7)
BTK		kinase	Activated	2.175	6.93e-07	BBC3,CCL4,CCND2,CD274,CDK2,CDKN1A,CEBPB,EMP1,HELLS,HMOX1,IFIT3,IL27,JUN,MTHFD2,MYC,PIM1,RELA,Zfp185	284 (19)
mercuric chloride		chemical toxicant			6.94e-07	CDKN1A,DDIT3,GADD45A,GSTM1,HMOX1,HSPB1,JUN,JUNB,Mt1,SPP1	391 (17)
TLR2		transmembrane receptor		1.664	7.16e-07	ATF3,CAST,CCL4,CDKN1A,CEBPB,Chil3/Chil4,DUSP1,FOS,GADD45A,GJA1,GRIN2A,HMOX1,IL1RN,IL27,MMP9,MYD88,NR1H4,PTGFR,RELA,SCD,SLC7A11,SOCS1,SOCS3,SQSTM1	359 (17)
resveratrol		chemical drug		1.516	7.42e-07	AR,ATF3,CCND1,CCND2,CD68,CDK2,CDKN1A,CYP11A1,DDIT3,EGR1,ESR1,FOS,FOSL1,FOSL2,HEY1,HMGCR,HMOX1,IGFBP3,JUN,LITAF,MMP9,MYC,PDK4,PGR,RELA,SERPINE1,SESN2,SHH,SPHK1,SPP1,SQSTM1,TNFAIP6	384 (21)
IRS1		enzyme		0.295	7.49e-07	CCND1,CEBPB,COL3A1,COL4A1,COL4A2,COL6A3,CRABP2,DDIT3,EGR1,FOS,GJA1,HMGCR,HMOX1,LPL,MYC,SPP1,TNNT2,TRIB3,WNT10A	450 (26)
RUNX3		transcription regulator		-0.319	7.49e-07	BBC3,BCL2L11,CCND1,CD79A,CDKN1A,COL4A1,EOMES,FBN1,FGF9,FLNA,GLI2,LILRB3,MMP9,MYC,PCDH7,RUNX1,SPP1,STC2,THY1	362 (22)
TAF4		transcription regulator	Inhibited	-2.543	7.54e-07	AR,BCL6,CCND1,CLDN1,COL6A3,DDIT3,FMOD,IL1RN,KRT6B,MAFF,MAFK,MAP3K6,RUNX1,SCUBE1,SPP1,SPRR1A
ZBTB10	-0.351	transcription regulator		0.966	7.7e-07	ACOD1,ARID5A,BCL2L11,CCL4,CD274,CD83,CD8A,ESR1,GBP6,HK1,IFIT3,Ifitm1,IFITM2,IL1RN,IL27,LPL,Mx2,MYD88,PRKCQ,RELA,SERPINE1	303 (12)
MAPK7		kinase		0.359	7.81e-07	ADAMTS1,CCND1,CYP51A1,DHCR24,DUSP1,ELOVL6,HMGCS1,HMOX1,IDI1,INSIG1,JUN,MSMO1,MYC,PLAT,STARD4	358 (23)
PSEN1		peptidase		0.062	7.96e-07	ATP1A2,ATP1B1,C1QC,CCL4,CCND1,CYP51A1,DLL3,DUSP1,EGR1,EIF5A2,EMP1,ENPP2,FOS,GADD45B,GJA1,GRIN2A,HK1,LRP1B,MMP9,Mt3,MYC,NUPR1,PDGFRA,PVALB,RHOQ,SH3GL2,SNAP25,SOCS1,SQSTM1,STAB1,TPPP,TUBA1C,TUBA4A,TUBB2B,TUBB3,TUBB6,VSNL1	361 (21)
IGF1R		transmembrane receptor		1.023	8.25e-07	ANXA3,BCL2L11,CCND1,CD300A,CD68,CDKN1A,CEBPB,COL18A1,COL3A1,COL4A1,COL4A2,COX6A2,CYP11A1,DDIT3,EGR1,EMP1,ESR1,FLNC,FOS,IGFBP3,INHBB,KRT6B,LPL,MT-ATP6,MYC,PLAT,RELA,S100A10,SNCG,SPP1,STAT3	369 (21)
epicatechin		chemical drug		1	8.71e-07	CCDC184,COL1A2,COL3A1,COL4A1,COL4A2,COL5A3,CYB5R2,ELOVL6,FBN1,HEY1,LPL,PARVG,PODN,PTPN6,SLC27A2,SNAP25	184 (7)
EPOR		transmembrane receptor			8.91e-07	CCND2,HMOX1,JUN,JUNB,MYC,PIM1,Serpina3g (includes others),SOCS1,SOCS3	240 (17)
KIF3A		enzyme	Activated	2.214	9.24e-07	ACAT2,CDKN1A,CYP51A1,GLI2,HMGCR,HMGCS1,IDI1,MYC	269 (7)
MTOR		kinase		-0.763	9.29e-07	AR,AVIL,BCL2L11,CCND1,CD274,CDKN1A,CEBPB,CYP11A1,DDIT3,DUSP1,EOMES,GAP43,GSTM5,HK1,HSPB1,KCND2,LDHB,LDHD,MICAL1,MLXIPL,MMP9,MYC,NOX4,PDK4,PGR,PIM1,PRKAR2B,PTPN6,RAP1GDS1,RELA,SNCG,SOCS3,SQSTM1,STAT3,TPPP	313 (18)
lomustine		chemical drug	Activated	3.051	9.6e-07	A2M,ANXA2,C4A/C4B,CACNG5,EMP3,GPNMB,LGALS3,MYC,PLA1A,S100A10,SPP1,TES,TNFRSF12A
Ro31-8220		chemical drug	Inhibited	-2.151	1e-06	CDKN1A,CLDN1,COL1A2,DDIT3,DUSP1,EGR1,HMOX1,ITGA5,Mt1,PRKCQ,SERPINE1	322 (19)
puromycin aminonucleoside		chemical reagent	Activated	3.153	1.03e-06	A2M,ADAMTS1,ANXA2,C4A/C4B,CACNG5,EFEMP2,EMP3,GPNMB,LGALS3,MYC,NOX4,PLA1A,S100A10,SOD3,SPP1,TES,TNFRSF12A
mir-3622		microRNA		-0.522	1.03e-06	BBC3,CCND1,CCND2,CDKN1A,GADD45A,GADD45B,MYC
Il3		cytokine	Activated	2.054	1.06e-06	ATF5,BCL2L11,CCND2,CD68,CDKN1A,EGR1,FOS,LTF,MYC,NFIL3,PIM1,SOCS1,SPP1,TNFRSF1B	251 (19)
ELK1		transcription regulator	Activated	3.174	1.06e-06	CDKN1A,EGR1,EGR2,EGR3,FOS,FOSB,FOSL1,JUN,JUNB,MMP9,MTHFD2,NUPR1,SLC7A11,SPP1	402 (21)
SLC15A4		transporter	Activated	2.998	1.06e-06	ADAMTS1,ANXA2,ANXA3,CD274,FOS,HMOX1,IFIT3,LGALS3,LOXL1,MARCKSL1,MTHFD2,PLAUR,PTPN6,SHTN1,STAP2,STC2,TNFAIP6,Tpm4,TUBB6	252 (10)
deferoxamine		chemical drug	Activated	2.394	1.1e-06	ADGRG1,ANXA2,APLN,CACNB4,CCL4,CCND1,CCND2,CD300A,CDK2,CDKN1A,DDIT3,DUSP1,FOS,GADD45A,GADD45B,HMOX1,IGFBP3,JUN,LPL,MYC,NFIL3,PLAT,PLAUR,SERPINE1,SPP1	249 (17)
aldosterone		chemical - endogenous mammalian		1.747	1.13e-06	ADAMTS1,APLN,ATP1B1,BMP4,CD68,CNKSR3,COL1A2,COL3A1,DUSP1,EGR1,EMB,FKBP1B,FOS,FOSL1,INA,LGALS3,LPL,PIK3CD,PLAUR,RGS2,SERPINE1,SPP1,TSC22D3	377 (22)
TARDBP		transcription regulator	Inhibited	-2.728	1.14e-06	ACAT2,BCL2L11,CFTR,CYP51A1,DHCR24,FDFT1,GALNT13,HLA-A,HMGCR,HMGCS1,IDI1,INSIG1,LAMB3,LRRN1,NUPR1,SFRP1,SQSTM1,SULT4A1
allopurinol		chemical drug	Activated	3	1.16e-06	A2M,ADAMTS1,ANXA2,C4A/C4B,CACNG5,EFEMP2,EMP3,GPNMB,HMOX1,LGALS3,MYC,PLA1A,S100A10,SPP1,TES,TNFRSF12A	386 (22)
GDF2		growth factor	Activated	2.387	1.16e-06	ANXA3,ELOVL1,EMB,ENPP2,FMOD,FOS,GADD45B,HSPB8,MMP9,MYC,SCD,SEMA3C,SERPINF1,SLC3A2,SPP1,TUBB3	318 (16)
SOCS3	1.233	phosphatase		-1.603	1.16e-06	ATF3,CCND1,CDKN1A,CRH,EGR1,FOS,IL1RN,JUN,Mx2,PLAUR,SCD,Serpina3g (includes others),SOCS1,SOCS3,STAT3,TNFRSF1B	377 (24)
TLR7		transmembrane receptor		1.956	1.2e-06	Abi3bp,ATF3,CCL4,CCND1,CD274,CD300A,CD79A,CD83,CDKN1A,CEBPB,FOSL1,GPR84,IFI44,IFIT3,IL27,JUNB,MYD88,NR1H4,PLAT,PTPN6,RGS4,SOCS1,TRPM2,UCMA,Zfp185	278 (16)
TNFSF13B		cytokine		1.942	1.2e-06	APLN,BCL2L11,BCL6,CCL4,CCND2,CD274,CD83,CTTN,DDR2,FOSL1,HELLS,IL1RN,JUN,MMP9,MYC,PLAUR,SOX11,SPP1,TNFAIP6,TNFRSF12A	361 (19)
IL13		cytokine		1.933	1.2e-06	ADORA1,ATF3,BCL3,CCL4,CEBPB,Chil3/Chil4,CLDN2,CLEC4E,COL18A1,COL1A2,COL3A1,CTSH,DHCR24,EGR1,EGR2,ENPP2,EZR,GPNMB,GPX3,GSN,HDC,HK1,HMOX1,IL1RN,JUN,KITLG,KLF6,LILRB3,LTBP1,MMP9,MSMO1,SERPINE1,SERPINF1,SOCS1,SOCS3,SPHK1,SPP1,SPRR1A,TGM2,TMC6,TNFRSF1B	418 (19)
LHCGR		G-protein coupled receptor		-0.145	1.2e-06	ADAMTS1,AR,CYP11A1,EDN2,ESR1,INHBB,INSL3,PGR,PRLR,TNFAIP6	427 (26)
NVP-TAE684		chemical drug		-1.131	1.2e-06	BCL2L11,CCND1,CCND2,CD274,COL3A1,FOSL2,JUNB,MYC,PTP4A1,SERPINE1	314 (20)
formaldehyde		chemical - endogenous mammalian		1.943	1.2e-06	EGR1,EGR2,FOS,FOSB,FOSL1,FOSL2,GABBR2,JUN,JUNB,MMP9	369 (21)
MYOC		other		1.067	1.24e-06	ADAMTS1,DDIT3,EGR2,FBN1,IGFBPL1,MAFK,PGR,RAB27B,SESN2,SFRP1,SLC7A11,SOX11,SPP1,STC2,TAF7L
PIK3R1		kinase	Activated	2.42	1.24e-06	AR,ATF5,CCL4,CCND1,CCND2,COL1A2,DDIT3,FOS,HMOX1,MMP9,MYC,PDGFRA,PIK3CD,SERPINE1,TRIB3	371 (21)
EPHB1		kinase	Activated	2.395	1.25e-06	EGR1,EGR2,FOS,JUN,JUNB,SERPINE1	344 (21)
ST3-Hel2A-2		chemical reagent	Activated	2.449	1.25e-06	ATF3,BCL6,DDIT3,EGR2,FOS,GADD45A	209 (11)
AFP		transporter		1.503	1.25e-06	EGR1,EGR2,FOS,MMP9,PTP4A1,TNFRSF12A	235 (11)
3M-002		chemical reagent		-0.791	1.28e-06	Abi3bp,ACOD1,CCL4,CCND1,CD300A,CD79A,CD83,CLEC4E,CYP26A1,FOSL1,GPNMB,GPR84,IFI44,MYD88,RGS4,SLFN12L,UCMA,Zfp185	359 (16)
miR-29b-3p (and other miRNAs w/seed AGCACCA)		mature microRNA	Inhibited	-2.922	1.33e-06	BCL2L11,CCND1,COL1A2,COL3A1,COL4A1,COL4A2,COL4A5,COL5A3,DNMT3B,EOMES,FBN1,INSIG1,NID2,PTP4A3,STAT3,ZFP36L1	366 (21)
oleic acid		chemical - endogenous mammalian		-0.471	1.33e-06	ATF3,BBC3,CD68,CEBPB,DDIT3,DUSP1,EGR1,FOS,GADD45A,GADD45B,HMGCR,HMOX1,IGFBP3,LPL,MLXIPL,Mt1,PDK4,SCD,SERPINE1,SPHK1	377 (23)
aspirin		chemical drug	Inhibited	-2.033	1.35e-06	ACVRL1,AHR,AKAP12,APLN,AR,CCL4,CCND1,CDK2,CDKN1A,DDIT3,EDNRB,EMP1,FBLN5,FBN1,GRIN2A,HEY1,IGFBP3,KITLG,MMP9,NOX4,RELA,RHOC	404 (18)
BHLHE40		transcription regulator		0.99	1.37e-06	AHR,ATF3,ATP1B1,CD274,CNTN1,CRABP2,CYP11A1,DAPL1,DDIT3,EOMES,FRZB,GBE1,GBP6,HDAC9,HK1,Ifitm1,IFITM2,Ighv1-52,LIF,MAFF,MTHFD2,NTRK3,PCDH7,PDE4B,PTPN6,RASGRP1,SOCS1,SOCS3,STAT3,TES,TGM2,THY1	364 (11)
TCL1A		transcription regulator			1.44e-06	ACOD1,C1QC,CD68,CLEC4D,CLEC4E,CTSH,FOS,GPNMB,HMOX1,LTF,MMP19,MMP9,NETO2,S100A9,SLC11A1	356 (12)
FGFR1		kinase	Activated	2.439	1.45e-06	BMP4,BMP7,CCND1,CCND2,CDKN1A,COL3A1,COL4A1,DDIT3,EIF4EBP1,FGF1,FOS,JUN,LIF,MYC,OLFML2A,PDGFRA,PLAUR,TUBB3	365 (21)
cerivastatin		chemical drug		-0.345	1.47e-06	CDKN1A,HMGCR,HMGCS1,HMOX1,HSPB1,IDI1,JUN,MMP9,MYC,PLAT,PLAUR,S100A9,SERPINE1,TSC22D3	400 (21)
PTH		other	Activated	2.846	1.48e-06	ADAMTS1,CALB1,CCND1,CDKN1A,CEBPB,COL1A2,DDIT3,DUSP1,EGR2,FOS,FOSB,FOSL2,GJA1,IGFBP3,JUN,LMNA,NFIL3,PDK4,RGS2,RUNX1,SOCS3,SPP1	374 (24)
LDB1		transcription regulator		0.712	1.5e-06	AHR,BBC3,BMP7,CCND2,CDKN1A,CLDN2,CLEC4E,COL18A1,EFEMP2,FBLN1,FRZB,GJA1,GSN,Ifitm1,IL1RAP,KIFAP3,LTBR,MDK,NOTCH3,NSG2,PIK3CD,RAB11FIP4,RASGRP1,SERPINF1,SFRP1,SQSTM1,STAT3,TES,THY1,TNFRSF1B
ADRA1B		G-protein coupled receptor			1.58e-06	CCND1,CDKN1A,CEBPB,COL3A1,DDAH1,DUSP1,EGR1,EGR2,FOS,JUN,LIF	354 (22)
ATP		chemical - endogenous mammalian		0.686	1.63e-06	AHR,BCL2L11,CCL4,CCND1,CD83,CLDN1,DUSP1,FLNA,FOS,GRIN2A,HK1,IL1RN,IL27,MYC,SERPINE1,SPHK1,TNFRSF1B,TUBB3	346 (21)
MIR17HG		other		-1.17	1.63e-06	BCL2L11,BMP4,CCND1,CD274,CDKN1A,CLIC1,DLL3,FBN2,FRAS1,HK1,HSPG2,LAMA5,LTBP1,PDGFRA,RELA,Sik1,SOX11,TBX20	256 (7)
AKIRIN2		other		0.656	1.64e-06	CCND1,CCND2,DUSP1,MMP9,MYC	295 (16)
ZFP36L2		transcription regulator		-1.342	1.64e-06	CD274,NEFH,Nefm,SCN2A,SNAP25
phytoestrogen		chemical drug			1.64e-06	AR,ESR1,LIF,LTF,PGR
trovafloxacin		chemical drug		1.941	1.65e-06	CDKN1A,FOS,HLA-A,HMOX1,JUNB,MLXIPL,MYD88,PDE4B,SERPINE1,SOCS3,STAT3,SUMO2,TGM2	363 (12)
methapyrilene		chemical drug		0.277	1.67e-06	A2M,ANXA2,ATF3,CCND1,DDIT3,ENPP2,GADD45A,GCKR,GSTM1,HMGCR,HMOX1,Mt1,Mx2,MYC,NR1H4,PLCB1,SCD,SLC27A2,SLC3A2
CCL5		cytokine		1.547	1.72e-06	AHR,ALCAM,CCL4,DDAH1,DUSP1,EMP1,FOS,HDC,HMGA1,IER2,MMP19,MMP9,PLAUR,STAT3	379 (22)
RAC1		enzyme	Activated	3.448	1.83e-06	ATF3,BCL6,CCND1,COL1A2,DUSP1,ESR1,FOS,FOSL1,GREB1,GSN,HMOX1,HSPB1,JUN,KRT6B,MMP9,MYC,PLAUR,STAT3	381 (21)
MET		kinase		1.144	1.86e-06	ARID5A,CCND1,CCND2,CD274,CDKN1A,CLDN1,ESR1,FOS,HDC,HMOX1,HSPB1,ITGA3,JUN,MYC,NOX4,PIM1,RUNX1,SOCS3,SPP1	322 (19)
phenylephrine		chemical drug		1.681	1.92e-06	COL3A1,DUSP1,EDNRB,EGR1,FOS,GJA1,HMOX1,JUN,MSTN,MYC,PDK4,RAPGEF3,RGS2,RGS4,SQSTM1	334 (21)
P38 MAPK		group	Activated	2.17	1.94e-06	ATF3,BBC3,CCND1,CCND2,CD83,CDKN1A,CEBPB,COL3A1,DDIT3,DUSP1,EDNRB,EGR1,EGR2,FLNA,FOS,GJA1,HMOX1,IL1RN,IRX1,JUN,JUNB,MMP9,MYC,Nes,NOTCH3,NR1H4,PLAUR,RGS4,RUNX1,SATB2,SERPINE1,SOCS3,SORCS3,SPP1,VIP	350 (17)
Raf		group		0.808	1.96e-06	BCL2L11,CCND1,CDKN1A,EGR1,ETV1,FOS,FOSL1,IER2,JUN,MAFF,MYC,SEMA3C,SEMA6A	285 (15)
COLQ		other		0.213	1.96e-06	BMP4,COL4A1,COL4A2,COL6A3,DOK7,FBLN5,FRAS1,HSPG2,ITGA7,LTBP1,MMP19,MMP9,NID2
trans-hydroxytamoxifen		chemical drug		-1.964	1.96e-06	ANXA3,BMP4,COL1A2,COL4A5,CTSH,DUSP1,EGR1,EGR3,FGF9,GREB1,INHBB,KLF6,LITAF,LMNA,MATN2,MYO1B,NELL2,PVALB,RUNX1,SERPINF1,SFRP1,SNCG	260 (7)
simvastatin		chemical drug		-0.178	1.97e-06	ADAMTS1,ANXA3,AR,ARHGEF2,CCND1,CCND2,CDKN1A,DDAH1,ESR1,FOS,GJA1,HK1,HMGCR,HMOX1,IGFBP3,IL27,LPL,MMP9,MYC,PLAT,RELA,SERPINE1,SOCS3,SPP1,TSC22D3	301 (17)
FBN1	0.502	other	Inhibited	-2.608	1.98e-06	COL1A2,COL3A1,COL4A2,COL6A3,FBN1,LTBP1,MMP9,SERPINE1	404 (19)
Mt2		other		-1.195	1.98e-06	ATF3,CCND1,FOS,JUN,LPL,MYC,RELA,SERPINE1	403 (17)
ethionine		chemical toxicant	Activated	2.538	2.01e-06	C4A/C4B,CACNG5,GPNMB,LGALS3,MYC,PLA1A,S100A10,SPP1,TES,TNFRSF12A
PKD1		ion channel		-0.914	2.07e-06	ACOT2,ADAM22,ATP1B1,CDKN1A,CLCF1,DDIT3,EDIL3,EIF4EBP1,FOSB,GLI2,HDAC9,IER2,LTBP1,MYC,PCDH7,PCDH9,PDE4B,PRLR,PVALB,RAB9B,SLITRK5,THG1L,TRIM15,ZBTB10	348 (13)
PELP1		other		-1.913	2.08e-06	CCND1,CDK2,CDKN1A,CTSH,FBN2,FOS,GREB1,HS3ST5,IFI44,MMP9,MYC,NIBAN1,PLD5,PRKCQ,PSAT1,S100A9,SESN2,SNCG,TGM2	330 (17)
AHNAK		other		-1.951	2.18e-06	CCND1,CCND2,CDKN1A,MYC	412 (22)
TCF		group	Activated	2.417	2.21e-06	ADGRG2,BMP4,CCND1,CRYBG1,EGR1,FGF9,FOS,GJA1,INHBB,JUNB,LGALS3,MYC,PLS3,SEMA3C,SERPINE1	382 (20)
APEX1		enzyme		1.151	2.25e-06	CDKN1A,EGR1,EGR2,EGR3,FOS,FOSB,JUNB,RGS2,RGS4	357 (20)
pitavastatin		chemical drug	Inhibited	-2.376	2.25e-06	CYP51A1,FDFT1,FOS,HMGCR,HMGCS1,IDI1,JUNB,MMP9,SLC27A2	246 (16)
letrozole		chemical drug		-0.602	2.25e-06	CCND1,CDK2,CDKN1A,ESR1,FOSL1,GJA1,LIF,MYC,PGR	382 (23)
PPARG		ligand-dependent nuclear receptor		-0.101	2.3e-06	ACOD1,BCL6,CCND1,CD274,CD68,CDK2,CDKN1A,CEBPB,COL1A2,CRABP2,CYP11A1,CYP26A1,EDN2,EIF4EBP1,ELOVL6,FGF1,FOSL1,HMGCR,HMOX1,IGFBP3,IGFBP7,INSIG1,JUN,KLF6,LAMB3,LPL,MMP9,MYD88,NOX4,PCK2,PDK4,RAB20,RELA,SCD,SDC1,SERPINE1,SNCG,SOCS1,SOCS3,SPP1,SPRR1A,TRIB3,TSC22D3	429 (20)
NUPR1	0.936	transcription regulator	Activated	2.469	2.3e-06	ADAM22,ADGRG1,AKAP12,ALOXE3,ATF3,BRINP3,CD63,CD68,CDK15,CDK2,CEBPB,COL1A2,COL3A1,DDIT3,DHCR24,DNMT3B,DUSP8,ETV1,FAM83G,FGF1,GADD45A,KLF6,LIF,MYC,MYD88,Nes,NFIL3,NUPR1,PIM1,POLA2,PRAG1,RAB20,RAB38,RILPL2,RIMKLA,SERPINE1,SESN2,SPC25,SPP1,THG1L,TRIB3,ZC3HAV1,ZFP36L1	152 (6)
CITED2		transcription regulator		0.361	2.32e-06	ACOD1,ARHGEF3,CALHM6,CD274,Chil3/Chil4,CMPK2,DUSP1,ENDOD1,GADD45B,GBP6,HLA-A,IFI44,IFIT3,IL1RN,KLF6,LPL,Mx2,PCMTD1,PDE7B,PIM1,RELA,SEMA3C,Serpina3g (includes others),SLFN12L,TGM2	325 (20)
acetaminophen		chemical drug		1.845	2.35e-06	A2M,ACOT7,AHR,CAST,CCND1,CDKN1A,CEBPB,Chil3/Chil4,DDIT3,GADD45A,GLUL,GSTM5,HMGCR,HMGCS1,HMOX1,IGFBP3,JUN,Mt1,MYC,NR1H4,PLAUR,SERPINF1,SLC27A2,SLC7A11,SOCS3,SRXN1	368 (14)
palmitic acid		chemical - endogenous mammalian	Activated	3.294	2.38e-06	AHR,ATF3,BBC3,BCL2L11,CCL4,CD68,CDKN1A,DDIT3,ELOVL6,FOS,Gm26588,GPAT3,HLA-A,HMOX1,Hrk,IL1RN,JUN,LPL,MLXIPL,Mt1,PDK4,PROKR1,RELA,SCD,SERPINE1,SOCS3,SPHK1,SQSTM1,TRIB3	356 (24)
DRD1		G-protein coupled receptor			2.42e-06	EGR1,FOS,FOSB,HTR1B,JUNB,S100A10	447 (24)
NDP		growth factor		-0.199	2.42e-06	EDN2,LIF,Mt1,NUPR1,POU4F3,SERPINF1
GATA6		transcription regulator		0.136	2.45e-06	ACOD1,BMP4,C4A/C4B,CALML4,CDKN1A,Chil3/Chil4,COL4A1,COL4A2,CRABP2,CYP11A1,DLX3,GBX2,LDHB,LTBP1,MYC,MYH9,PAX2,PDGFRA,PGM2,SCD,SEMA3C,SHH,SPRR1A,ZIC2	287 (13)
GIP		other		0.041	2.51e-06	ATF3,CCL4,FOS,GBP6,IFIT3,IL1RN,LPL,RGS2,SERPINE1,SOCS3,SPP1,TNFRSF1B	270 (19)
bicuculline		chemical - endogenous non-mammalian	Activated	3.377	2.51e-06	ATF3,DUSP1,EGR1,EGR2,FOS,FOSB,GADD45B,GADD45G,IER2,JUN,JUNB,MAFF	461 (26)
LMO2		transcription regulator		0.756	2.55e-06	ADGRG1,AHR,BBC3,BMP7,CCND2,CDKN1A,CLDN2,CLEC4E,COL18A1,EFEMP2,FBLN1,GJA1,GSN,Ifitm1,IL1RAP,KIFAP3,LTBR,MDK,NOTCH3,NSG2,PIK3CD,RAB11FIP4,RASGRP1,SERPINF1,SQSTM1,STAT3,TES,THY1,TNFRSF1B	141 (7)
Pka		complex		0.582	2.57e-06	CDK2,CDKN1A,CEBPB,CYP11A1,CYP51A1,DDIT3,DUSP1,EGR1,FOS,GJA1,HMGCR,HMOX1,JUN,JUNB,KLF6,PDE4B,RGS2,RUNX1,SHH	363 (21)
NR0B2		ligand-dependent nuclear receptor	Inhibited	-2.7	2.58e-06	CDKN1A,COL1A2,CYP11A1,CYP51A1,CYP7B1,EGR1,GSTM1,GSTM5,HDC,HMGCR,IL1RN,NR1H4,PCK2,PDK4,PIK3CD,SCD,SERPINE1,SPP1	302 (22)
INSIG2		other	Activated	2.586	2.68e-06	DDIT3,ELOVL6,FDFT1,HMGCR,INSIG1,SCD,TRIB3	248 (9)
LDLR		transporter		0.956	2.74e-06	ALCAM,CCL4,CCND1,CD274,CD68,CDKN1A,CLEC4E,CYP7B1,DDIT3,DUSP1,EGR1,ELOVL6,GADD45G,GJA1,HELLS,HMGCR,HSPG2,IL1RN,LPL,MMP9,MYC,PCK2,PGM2,SCD,SOCS1,SPP1	404 (21)
ELOVL3		enzyme		1.976	2.75e-06	ACAT2,CD68,COL1A2,COL3A1,COL6A3,FDFT1,GPNMB,HMGCR,IDI1,MSMO1,Psg29,PVALB,SPP1
curcumin		chemical drug		-1.599	2.77e-06	AR,BBC3,BCL2L11,CCND1,CCND2,CDK2,CDKN1A,CEBPB,CLIC1,COL1A2,DDIT3,DNMT3B,EGR1,FOS,FOSB,FOSL1,FOSL2,GLUL,HMOX1,JUN,JUNB,LPL,MARCKSL1,MMP9,MYC,PIM1,POU3F2,RELA,SERPINE1,SNCG,SOCS1,SOCS3,STAT3,TSC22D3,TUBB3	397 (18)
RARG		ligand-dependent nuclear receptor		1.405	2.92e-06	CCL28,COL4A1,CRABP2,CYP26A1,DUSP1,EGR1,EGR2,FOS,GAP43,GREB1,INSL3,JUN,MYC,Serpinb6c,ZMAT4	423 (21)
1-methyl-4-phenyl-1,2,3,6-tetrahydropyridine		chemical toxicant		1.937	2.93e-06	ANXA2,CALB1,CLDN1,EGR1,EGR3,FOS,FOSB,GRM1,HMOX1,HSPB1,JUN,LIF,PDGFRA,PVALB,SQSTM1,TNFRSF1B	420 (20)
dalfampridine		chemical drug	Activated	3.464	3.01e-06	ATF3,DUSP1,EGR1,EGR2,FOS,FOSB,GADD45B,GADD45G,IER2,JUN,JUNB,MAFF	441 (23)
Tnf (family)		group	Activated	2.552	3.02e-06	ATF3,BBC3,CCL4,CCND1,CD274,CLDN2,CRH,ENPP2,GJA1,GPR84,IL1RN,JUN,LAD1,MMP9,MSTN,MYC,NOX4,SERPINE1,SOCS3,TGM2,TNFAIP6,TNFRSF1B,TNFRSF4	318 (15)
androgen		chemical drug		-0.793	3.1e-06	AR,BMP4,C4A/C4B,CCND1,COL4A2,DHCR24,DNMT3B,FLNA,FOS,FOSL1,GJA1,GSN,JUN,MMP9,Mt1,MYC,PIM1,RUNX1,SDC1,SOCS1,STAT3	356 (21)
STAT5A		transcription regulator		0.102	3.13e-06	A2M,AR,BCL6,CCND1,CCND2,CD68,CDKN1A,CEBPB,EOMES,ESR1,FOS,FOSB,FOSL2,GADD45A,GADD45G,Ifitm1,IFITM2,KLF10,LAMB3,LTBR,MYC,PIM1,PRLR,RAB27B,RIMKLA,SH3GL2,SOCS1,SOCS3,TNFRSF4	398 (23)
GMNN		transcription regulator		-0.577	3.17e-06	BMPER,CDKN1A,CDT1,CYP26A1,DSP,DUSP1,EOMES,FRZB,GREB1,PCDH18,PDGFRA,POU4F1,TEAD2,WLS
MMP2		peptidase		1.136	3.23e-06	CCND1,CDKN1A,CEBPB,COL18A1,COL3A1,HMGCR,IL1RN,INSIG1,ITGA3,MLXIPL,MYC,PDK4,SOCS1	396 (21)
phenacetin		chemical drug		1.803	3.26e-06	A2M,ANXA2,CACNG5,LGALS3,MYC,PLA1A,S100A10,SPP1,TES,TNFRSF12A	230 (7)
acyline		biologic drug			3.32e-06	BCL6,CYP11A1,DUSP1,EGR1,FOS,GADD45B,GADD45G,HMGCR,JUN,JUNB,MYC,RGS2,Sik1,SLC1A4,SLC7A1,SLC7A11	310 (16)
EIF4E		translation regulator	Activated	2.471	3.4e-06	CCND1,CD274,CDK2,CDKN1A,CDT1,CEBPB,EIF4EBP1,ESR1,FOSL1,GPX3,HLA-A,HMOX1,INSIG1,LAT2,MMP9,MYC,PIM1,PLAUR,PVALB,REPS2,SLC11A1,SPHK1,SRXN1,VIP	373 (19)
metformin		chemical drug		-1.988	3.5e-06	AHR,ATF3,BCL3,CCND1,CCND2,CD274,CDKN1A,CEBPB,CYP11A1,DDIT3,EOMES,FOS,GADD45B,GADD45G,GPNMB,HMOX1,IFI44,IL1RN,INSIG1,MMP9,MSTN,MYC,PGR,PHLDA3,SERPINE1,SERPINF1,SHH,SOCS3	281 (18)
RAS		group		1.765	3.59e-06	ARHGEF2,BCL2L11,CCND1,CD274,CDKN1A,EGR1,FOS,FOSL1,HMGA1,HMOX1,JUN,LIF,MMP9,MYC,PLAUR,POU3F2,SERPINE1,TGM2	326 (17)
STAT6		transcription regulator	Activated	2.639	3.66e-06	ARID5A,BCL3,BCL6,CCND2,CDK2,CDKN1A,Chil3/Chil4,CLDN2,CMPK2,COL1A2,COL3A1,DDAH1,EGR1,EGR2,FLRT2,GADD45B,GADD45G,GBP6,GBP7,HMGCR,IER2,IFI44,IFIT3,IL1RN,LIF,MMP9,NFIL3,PDK4,PLCD1,RASSF4,S100A10,SERPINE1,SERPINF1,SOCS1,SPHK1,SQSTM1,TES,THY1,TMTC1,TNIP2	356 (19)
roscovitine		chemical drug		-1.444	3.68e-06	AR,BCL2L10,BCL2L11,CCND1,CD274,CD63,CDK2,CDKN1A,JUN,MYC,TNFRSF4	383 (23)
carrageenan		chemical drug	Activated	2.262	3.68e-06	EGR1,EGR2,ESR1,FOS,FOSB,FOSL1,FOSL2,JUN,JUNB,RELA,TRPM2	405 (21)
Calcineurin protein(s)		complex		-0.086	3.8e-06	BCL2L11,CCL4,DUSP1,EGR1,EGR2,FOS,KCNQ2,NFIL3,PVALB,RGS2,SERPINE1,SPP1,STAT3	305 (18)
GDF11		growth factor		0.489	3.8e-06	BMP4,BMP7,CCND2,COL4A2,FOS,GNG4,ITGA3,ITGA5,LAMB3,LPAR5,MSTN,PPP2R2C,SPP1	308 (12)
SMAD4		transcription regulator	Activated	3.193	3.84e-06	ACVR1C,ARHGEF2,BBC3,BMP4,BMP7,CCND1,CCND2,CD79A,CDKN1A,COCH,COL1A2,DLX3,EIF4EBP1,FOS,FOSL1,GADD45A,GADD45B,GJA1,HMOX1,KITLG,MYC,NOTCH3,RUNX1,SCD,SERPINE1,SHH,SPHK1,TNFAIP6,VIP	406 (21)
MITF		transcription regulator		1.302	3.89e-06	ALCAM,CDK2,CDKN1A,CDT1,CRYBG1,EDNRB,FMOD,FOS,GPNMB,GREB1,HAPLN1,ITGA3,LGALS3,MICAL1,PLA1A,POU3F2,RAB27A,RHOQ,SCD,SDC1,SEMA3C,SEMA6A,SERPINE1,SERPINF1,SHTN1,SPC25,TMC6	347 (17)
NPC1		transporter		-1.92	3.89e-06	CCND1,CD63,CD68,CD8A,CTSH,CYP51A1,DDIT3,EGR1,HLA-A,HMGCR,HMGCS1,IDI1,LGALS3,LPL,S100A9,SCD,SQSTM1,STAT3,SULT4A1	362 (25)
NTF3		growth factor		0.099	3.93e-06	CCND2,ETV1,FOS,GJA1,GRIN2A,JUN,PVALB,RELA,VGF	362 (24)
4-(2-aminoethyl)benzenesulfonylfluoride		chemical - protease inhibitor		0.631	3.93e-06	ATP1A2,CDKN1A,COL1A2,DDIT3,ENPP2,FBN2,HMOX1,SCN1A,SERPINI1	243 (10)
beta-galactosidase		group			3.93e-06	ALCAM,COL3A1,COL4A5,COL6A3,EGR2,EZR,FLRT2,SEMA3D
AMPK		complex		-0.201	3.97e-06	AR,BCL2L11,CCND2,CDKN1A,CLDN1,EGR1,GJA1,HMOX1,IL1RN,LDHB,LITAF,MMP9,MSTN,MT-ATP6,NOX4,SERPINE1,SLC6A8	339 (19)
azoxymethane		chemical toxicant		0.223	4.24e-06	BBC3,BMP4,CCL4,CCND1,CDKN1A,IGFBP3,MMP9,MYC,NOTCH3,OLFM4,PRKCD,PTP4A3,RELA,STAT3	363 (19)
RHOC	0.807	enzyme		-1.342	4.25e-06	ATF3,CDKN1A,DDIT3,GLUL,NAT8L	274 (15)
OSMR		transmembrane receptor		1.964	4.3e-06	BCL3,FOS,GAP43,JUNB,Mx2,PIM1,SBNO2,SCD,Serpina3g (includes others),SOCS1,SOCS3,STAT3	242 (18)
MED1		transcription regulator		0	4.33e-06	BCL3,BCL6,CCND1,CCND2,CD79A,CDK2,CDKN1A,CYP11A1,EBF1,GADD45A,GREB1,HECW2,HYDIN,IGFBP3,LAD1,LIF,MYC,NID2,PDK4,PIM1,PRLR,SCD,SLC27A2,STC2	423 (23)
CSF2RA		transmembrane receptor	Activated	2.429	4.35e-06	CCND2,FOS,JUN,JUNB,MYC,PIM1	312 (19)
CHD4		enzyme		-1.387	4.44e-06	ADORA1,CDA,CDKN1A,CLCF1,ELAVL2,GNB3,HMOX1,JAK3,JUN,OPRL1,PRPH,SOCS3,SYDE1	237 (11)
CDK19		kinase		-1.976	4.45e-06	ATF3,CCND2,CDKN1A,FDFT1,GADD45A,HMGCS1,HMOX1,JUN,LIF,MYC,OSGIN1,PHLDA3,SDC1,SLC7A11,SPHK1,TRIB3,ZFP36L1	164 (7)
GH1		growth factor		1.39	4.45e-06	ATF3,CEBPB,DDIT3,EGR1,FOS,GADD45A,GRIN2A,IGFBP3,JUN,JUNB,JUP,PRLR,Serpina3g (includes others),SHMT2,SOCS1,SOCS3,SPP1	354 (22)
FGFR2		kinase		1.367	4.46e-06	BMP4,BMPER,CCND1,CCND2,CD274,CDKN1A,COL3A1,COL4A1,COL4A2,CTSH,GJA1,INHBB,MYC,PCOLCE,PDGFRA,PLAUR,SFRP1,SPP1	416 (23)
SPHK1	0.555	kinase		0.047	4.48e-06	BCL2L11,CCND1,CDKN1A,COL1A2,CTTN,DDIT3,EGR1,JUN,SERPINE1,SOCS3,SPHK1	369 (19)
CCN5		growth factor		-0.389	4.48e-06	CCND1,CLDN1,DSP,ESR1,IGFBP7,ITGA5,JUN,JUP,LAMB3,LPL,SERPINE1	388 (24)
PRDM1		transcription regulator		-0.054	4.68e-06	ADGRG1,BCL2L11,BCL6,CD79A,CLDN1,EGR2,ESR1,F5,FAM167A,FAR2,FOS,FOSL1,GBE1,GPAT3,GPR84,HLA-A,IFIT3,LGALS3,LRRN1,MYC,PCDH18,PTPN6,RAPGEF3,S100A9,SLC25A37,SLC5A8,TNFAIP6,TNFRSF1B,TSPAN10	371 (15)
bisphenol A		chemical - endogenous mammalian		-0.514	4.98e-06	AR,CCND1,CDKN1A,COL1A2,COL5A3,CTTN,EGR1,ESR1,FGF1,FGF9,FOS,GABRG2,HMOX1,Igkv1-117,MMP9,PGR,RBPMS,RPH3A,SLC6A13,SQSTM1,STAT3,TGM2,ZYX	466 (21)
PSMB11		peptidase	Inhibited	-2.72	4.99e-06	Abi3bp,BMPR1B,CCND1,CLDN2,COL1A2,COL3A1,COL4A6,COL5A3,GADD45A,GADD45B,GNB3,HMOX1,LGALS3,MT-ATP6,ROBO2,TNFRSF12A,TNFRSF1B	275 (7)
EPHA2		kinase	Activated	2.538	5.13e-06	ATF3,CD274,DUSP1,EGR1,FOS,FOSB,JUN,JUNB,KLF6,MMP9	365 (21)
everolimus		chemical drug		-1.428	5.13e-06	BBC3,CCND1,CCND2,CD274,CDKN1A,CEBPB,MYC,NKD1,OLFM4,SQSTM1	385 (20)
Creb		group	Activated	2.666	5.15e-06	ADCYAP1,ADK,ATF3,BBC3,CCND1,CDH10,CDKN1A,CEBPB,COX6A2,CRH,CYP51A1,DUSP1,EGR1,EGR3,FOS,FOSB,FOSL1,GABRG2,GJA1,HSPB8,JUN,JUNB,NMNAT2,NRN1,PCOLCE,PDE4B,PLAT,PYCR1,RGS2,RIPK1,SLC7A11,SYNPO	421 (24)
SPDEF		transcription regulator		-1.338	5.19e-06	CDKN1A,COL4A1,COL4A2,COL4A5,COL4A6,COL6A3,ITGA3,ITGA5,PLAUR,SDC1,SERPINE1,SERPINE3,SQSTM1	370 (13)
HSF1		transcription regulator		-0.716	5.34e-06	Abi3bp,AMZ1,BAG3,BMP4,BMP7,CD274,CEBPB,COL18A1,FBLN1,FGF1,FMOD,GREB1,HMOX1,HSPB1,HSPB8,INHBB,JUN,LIF,LPL,MMP19,POLA2,RELA,SCD,SEMA3A,SEMA3C,TUBB4A	391 (18)
norepinephrine		chemical - endogenous mammalian		1.909	5.36e-06	CEBPB,COL1A2,CRH,DUSP1,EGR1,ELOVL1,ELOVL6,EOMES,FOS,FOSL2,GALNT14,GRM1,HMOX1,IL27,LAMB3,MMP9,PDE4B,SERPINE1,Sik1,TINAGL1,WNT10A	377 (20)
ECSIT		transcription regulator	Activated	2.121	5.4e-06	BCL3,CD83,HMOX1,IL1RN,JUNB,NFKBIE,PIM1,PLAUR	303 (15)
EPCAM		other		-0.953	5.4e-06	ATF3,CCND1,CDKN1A,EGR1,FOS,FOSL1,JUN,MYC	379 (20)
BAX		transporter		0.518	5.43e-06	BCL2L11,CDK2,CDKN1A,CTSH,ETV1,HLA-A,Hrk,Ifitm1,IFITM2,MMP9,TGM2	345 (23)
CCN1		other	Activated	2.576	5.62e-06	BCL2L11,CCL4,CCND1,CCND2,CDKN1A,COL1A2,ESR1,ITGA3,ITGA5,JUN,MMP9,MYC,SERPINE1,SFRP1	355 (18)
EML4-ALK		fusion gene/product		1.589	5.62e-06	BCL2L11,CD274,CDKN1A,COL3A1,DUSP1,EGR1,GADD45B,IGFBP3,JUNB,PTP4A1,RAB27A,SERPINE1,SOCS3,STAT3	317 (18)
gefitinib		chemical drug		1.026	5.68e-06	ADAMTS1,BCL2L11,CCND1,CD274,CDK2,CEBPB,EGR3,EHD1,FOSL1,GADD45B,GJA1,HMOX1,HSPB1,LTF,MAFF,MMP9,Muc1,NOX4,PDGFRA,PLAUR,S100A9,TGM2	406 (18)
Histone h4		group			5.8e-06	AKAP12,CCL4,CCND1,CDKN1A,ESR1,FOS,GADD45B,MMP9,Mt1,NCAM2,PRLR,RASGRP1,SFRP1,SOCS3,SPHK1,SPP1,STAT3,SYNPO,TNFRSF4	401 (21)
PML		transcription regulator		0.509	5.91e-06	CCND1,CDK2,CDKN1A,DDX60,ELOVL6,GADD45A,HMGCR,HMGCS1,HMOX1,HSPB1,IDI1,IFI44,IFIT3,JUP,LPL,MAFF,PDK4,SCD,SQSTM1,SUMO2	397 (23)
GNRH1		other		1.505	6.05e-06	CYP11A1,EGR1,EGR2,FOS,FOSB,INHBB,JUN,JUNB,PGR,PLAT,PRKCD,PRKCQ	376 (23)
GRIN1		ion channel	Inhibited	-2.714	6.05e-06	ATF3,CRH,ECEL1,EGR3,GAL,GRIN2A,IGFBP3,RIN1,SEMA6A,SERPINE1,SOX11,SPRR1A	315 (12)
PRKCA		kinase		0.278	6.22e-06	CCND1,CDKN1A,EGR1,FOS,HEY1,IFIT3,IGFBP3,INSIG1,JUN,LPL,MMP9,MYC,PRKCD,RUNX1,S100A9,SERPINE1,TRPC1	416 (24)
BMP4	1.483	growth factor		1.16	6.32e-06	ADGRG1,BMP4,CCND1,CDK2,CDKN1A,CEBPB,COCH,CYP11A1,DLX3,FGF12,GJA1,HEY1,INHBB,JUN,JUNB,KLF10,MAFK,MYC,NUPR1,PAX2,SERPINE1,SHH,SLC13A4,TGM2,TNNT2	440 (25)
BRAF		kinase		0	6.36e-06	ATF5,BCL2L11,CCND1,CD63,CDKN1A,CEBPB,COL18A1,COL3A1,COL4A1,COL4A2,COL5A3,DDIT3,DNMT3B,EGR1,HSPG2,IGFBP7,JUN,LAMB3,LOXL1,MMP9,MYC,PLAUR,POU3F2,SDC1,SERPINE1,SLC7A1,UGT8	406 (21)
SLC6A4		transporter		-1.929	6.36e-06	CYP4F8,GNAI1,GPNMB,HTR1A,HTR1B,NELL1,PRSS56,PTP4A1,SLC7A5,SLFN12L	117 (4)
ATP2B2		transporter		0.508	6.36e-06	A2M,CDKN1A,DDIT3,DDR2,EIF4EBP1,FLNC,GADD45A,LOXL1,NUPR1,SOD3	145 (8)
benzo(a)pyrene		chemical toxicant		0.73	6.39e-06	AHR,BBC3,BCL2L11,CDK14,CDKN1A,DOK5,FGF9,FOS,GNAI1,GSTM1,HMOX1,HS6ST2,HSPB1,IL1RAP,INHBB,JUN,MAFF,PLCB1,PRKCQ,RHOC,SERPINE1,SLC1A4,SOD3,SQSTM1	342 (19)
26s Proteasome		complex		-1.677	6.4e-06	AHR,AR,ATF5,BAG3,BCL2L11,BCL3,CD68,CDKN1A,Chil3/Chil4,DDIT3,ESR1,FOSL1,HSPB8,JUNB,MYC,PGR,SOCS3,SQSTM1,TGM2	424 (22)
CDH1		other		-0.122	6.45e-06	BMP4,BMP7,CCND1,EIF4EBP1,FOSL1,GLI2,IGFBP3,JUN,JUP,MMP19,MMP9,MYC,PLAUR,SHH	408 (24)
EGR2	1.525	transcription regulator		1.534	6.48e-06	BCL2L11,BCL6,CAST,CDKN1A,CEBPB,CYP51A1,EGR1,EGR2,FOS,GRIN2A,HMGCR,JUN,KITLG,MYC,Nefm,POU3F2,PRKCD,SCD,SOCS1,SOCS3	347 (23)
leukotriene D4		chemical - endogenous mammalian	Activated	2.743	6.56e-06	ADAMTS1,ATF3,CCL4,DUSP1,EGR1,EGR2,EGR3,FOSL2,PDK4,RELA,RGS2	365 (22)
miR-450a-5p (and other miRNAs w/seed UUUGCGA)		mature microRNA		-1.667	6.57e-06	COL1A2,COL3A1,EMP3,ESR1,ITGA5,MMP9,SERPINE1,SPP1,SYDE1
GLIS1		transcription regulator	Activated	3	6.57e-06	COL1A2,COL4A1,COL4A2,FBLN1,FBLN5,FBN2,ITGA3,LOXL1,S100A9
PLAT	0.681	peptidase		1.447	6.57e-06	CCND1,DDIT3,FOS,JUN,MMP9,MVP,MYC,PLAT,SERPINE1	329 (19)
NR1I2		ligand-dependent nuclear receptor		0.621	6.71e-06	AHR,CDKN1A,CLEC4E,CYP39A1,EGR1,ELOVL6,GLUL,GSTM1,GSTM5,HMGCS1,IL27,INSIG1,JUN,LTBP1,NR1H4,RELA,SCD,SOCS1,SORL1,SPHK1,STAT3,TGM2	534 (21)
cuprizone		chemical toxicant	Activated	2.673	6.85e-06	ANXA2,ANXA3,C1QC,CCL4,FDFT1,FLNA,FOS,GLUL,GSN,HMGCS1,LGALS3,MAP6D1,MYH9,SOCS3,SYNPO,TPPP3	132 (6)
celecoxib		chemical drug		0.145	6.94e-06	AR,B3GALT5,CCND1,CD68,CDKN1A,COL3A1,DDIT3,ESR1,FOS,GADD45A,HMOX1,MMP9,RELA,RIPK1,SERPINE1,ST3GAL4,TNFRSF1B	400 (22)
NCOA1		transcription regulator		0.374	7.04e-06	ADAM22,AHR,CCND1,CDKN1A,CEBPB,CRH,CYP11A1,EGR1,EOMES,FOS,HIC1,IL1RN,JUNB,Muc1,MYC,PGR,PLCD1,PRLR,SERPINE1	267 (17)
methylmercury		chemical toxicant		-1.155	7.13e-06	ACVR1C,ATF5,CD63,COL3A1,DHCR24,EGR1,HMOX1,IGFBP3,LTBR,Mt1,PLS3,PRLR	254 (12)
PTPN11		phosphatase		0.514	7.29e-06	CCND1,CD68,CDKN1A,EGR1,FOS,IFIT3,JUN,LTF,MMP19,OLFM4,PIM1,PLAUR,RPRM,SOCS3,VIP	336 (22)
eicosapentenoic acid		chemical drug		1.056	7.29e-06	CD83,CEBPB,DDIT3,FBN1,FOS,HMOX1,HTR1A,IL1RAP,JUN,MLXIPL,MMP9,PDK4,RELA,SERPINE1,TNFRSF1B	324 (20)
onapristone		chemical drug	Inhibited	-2	7.36e-06	ADAMTS1,ADCYAP1,ESR1,PGR,RUNX1,SPHK1	298 (15)
haloperidol		chemical drug		-0.249	7.39e-06	ADCYAP1,CRH,EGR1,FOS,FOSB,GRIN2A,HMGCR,HMGCS1,HSPG2,PCSK2,PRKAR2B,PVALB,RESP18,SCN2B	409 (22)
molybdenum disulfide		chemical reagent		-1.414	7.48e-06	COL4A1,COL4A2,COL5A3,FBN1,GPNMB,HAPLN1,HMGA1,HMOX1,IFI44,ITGA7,JUP,LAMA5,MYH9,NID2,PCDH10,PODN,SPP1,TINAGL1
CCR2		G-protein coupled receptor	Activated	3.207	7.69e-06	B3GAT2,C1QC,CCL4,Chil3/Chil4,COL1A2,COL4A1,COL4A2,COL6A3,FBLN1,FBLN2,FBN1,HSPG2,MMP9,OGN,PCOLCE,TGM2	400 (16)
AIP		transcription regulator		0.429	7.88e-06	AHR,DUSP1,GNG4,HTR1D,PDE4B,PDE7B,PRKCD,PROKR1,RASGRP1,RGS2,RGS4
GPR174		G-protein coupled receptor		1.291	8.24e-06	ARID5A,BCL2L11,BCL3,CDT1,HDAC9,LITAF,PDE4B,PPP1R16B,PTPN6,RGS2,SCD,Sik1,STAT3,TNFRSF1B,ZYX
STING1		other		0.191	8.28e-06	BBC3,CALB2,CCL4,CD68,CD83,DDIT3,DDX60,HDC,HLA-A,IFI44,IFIT3,JAK3,LIF,PLAT,PLAUR,S100A9,Serpina3g (includes others),SLC11A1	285 (18)
CIP2A		other		-0.389	8.39e-06	CORO6,FAM110D,GADD45A,GPNMB,LDHB,MYC,NPTX1,PDK4,PDLIM7,PLAUR,RHOC,TUBA4A
GNB2		enzyme			8.39e-06	AHR,CCL4,CD83,CDKN1A,DUSP1,FOSB,FOSL2,PDE4B,TSC22D3	191 (7)
SRC		kinase		1.724	8.6e-06	CCND1,CCND2,CDKN1A,COL1A2,DUSP1,FOS,FOSL1,GJA1,JUN,MMP9,MYC,PLAT,PLAUR,PRKCD,SPP1,STAT3,SYNPO	359 (18)
DICER1		enzyme		-1.191	8.75e-06	ACVR1C,BCL2L11,CCND1,CCND2,CDKN1A,COL18A1,CRH,DHCR24,EGR1,EGR2,EGR3,EOMES,FOS,HMGCR,IL27,ITGA5,JUN,MMP9,MYC,NEFH,PRKCD,PRKCQ,PTPRN,RASGRP1,RUNX1,SEMA3C,SERPINE1,SERPINF1,SOCS3,SYNPO	389 (23)
tamoxifen		chemical drug		0.768	8.75e-06	ADORA1,BMP4,CCND1,CDK2,CDKN1A,COL1A2,CRH,DNMT3B,EIF4EBP1,ESR1,FOLR1,FOS,GAP43,GREB1,HMGCR,HMGCS1,IGFBP3,Igkv1-117,IL1RN,JUN,JUNB,LIF,MAFF,MYC,PGR,PHGDH,SCD,SLC7A5,SPP1,SQSTM1	411 (21)
Ras homolog		group		0	8.86e-06	CCND1,CDKN1A,EGR1,FOS,MMP9,MYC,PDGFRA	387 (23)
SIN3B		transcription regulator			8.86e-06	BCL6,COL1A2,DDIT3,GADD45B,KLF10,KLF6,MYC	254 (7)
Ap1		complex	Activated	2.903	9.02e-06	ATF3,BCL2L11,CCL4,CCND1,DDIT3,EZR,FOS,FOSL1,HMOX1,IGFBP3,JUN,KRT6B,LPL,MMP9,MYC,PLAUR,SERPINE1,SNCG,SOCS1,SOCS3,VIP	330 (17)
MEMO1		other	Activated	2.215	9.25e-06	CCND1,FOS,JUN,MYC,STC2	323 (19)
OTUB1		enzyme		0.603	9.25e-06	CCND2,CD274,ESR1,GREB1,PGR	267 (6)
DETA-NONOate		chemical reagent		1.43	9.43e-06	CCND1,CDKN1A,DUSP1,FOS,HMGCR,HMOX1,MMP9,MYC,SERPINE1,SOD3,TAGLN2	355 (21)
AMBRA1		other		-1.557	9.63e-06	CCND1,CCND2,CDKN1A,COL18A1,COL3A1,COL4A1,COL4A2,COL5A3,LOXL1,SERPINE1	331 (23)
ACTL6A		other		-0.378	9.75e-06	BBC3,BCL2L11,CCND1,CCND2,CDK2,CDKN1A,HMOX1,MYC	332 (14)
methylnitronitrosoguanidine		chemical toxicant	Activated	2.743	9.75e-06	BBC3,CCND1,CDKN1A,EGR1,GADD45A,KLF10,PLAT,SERPINE1	355 (19)
cholesterol		chemical - endogenous mammalian	Activated	3.622	9.76e-06	ATF3,C1QC,CCL4,CD68,COL3A1,CYP7B1,DDIT3,FDFT1,GLI2,GNAI1,HMGCR,HMGCS1,IDI1,IL1RN,INSIG1,KITLG,LGALS3,LPL,MSMO1,PSAT1,SCD,SHH,SLC7A5,SOCS3,STARD4	278 (11)
TLR9		transmembrane receptor	Activated	2.589	1.05e-05	ACOD1,ATF3,CAST,CCL4,CCND1,CD274,CD300A,CD83,CDK2,DUSP1,EGR1,GADD45B,HMOX1,IFIT3,LIX1,MYC,MYD88,NR1H4,RELA,SDC1,SERPINE1,SOCS1,SOCS3,SPHK1,TNFRSF1B	375 (19)
IFT88		other		1.869	1.06e-05	ACAT2,CEBPB,COL1A2,CYP51A1,HMGCR,HMGCS1,IDI1,MMP9,SHH	341 (13)
EIF2AK4		kinase	Activated	2.33	1.06e-05	ATF3,ATF5,CHAC1,DDIT3,EGR1,PCK2,PHGDH,PSAT1,TRIB3	103 (5)
ILF3		transcription regulator		-0.288	1.1e-05	ACAT2,ALCAM,ATF3,CD300A,CH25H,FOS,IL1RN,LGALS3,LPL,NFKBIE,PLAUR,SCD,SLC3A2,TNFRSF12A
methyl methanesulfonate		chemical toxicant	Activated	3.244	1.12e-05	ATF3,CDKN1A,DDIT3,EGR1,GADD45A,GADD45B,GADD45G,JUN,LIF,NUPR1,PHLDA3	398 (18)
brefeldin A		chemical - endogenous non-mammalian		1.644	1.12e-05	BBC3,CEBPB,DDIT3,ESR1,GADD45B,GJA1,HLA-A,HMOX1,KCND2,LPL,SESN2	358 (17)
benzene		chemical toxicant		-1.242	1.12e-05	ACVR1C,ATF5,CD63,CDKN1A,COL3A1,DHCR24,EGR1,IGFBP3,LTBR,PLS3,PRLR
tacrolimus		chemical drug		1.604	1.15e-05	BCL2L11,CALB1,CALB2,CCL4,CCND1,COL3A1,EGR1,ESR1,ETV1,F5,FLNA,FOS,FOSB,GAP43,HELLS,JUN,JUNB,MARCKSL1,MYC,NPTX1,PDLIM4,SPP1,TNFRSF12A,TNFRSF1B,TNFRSF4,WLS	336 (19)
ZMPSTE24		peptidase		-1.944	1.18e-05	ATF3,CDKN1A,ETNPPL,GADD45A,GADD45B,GADD45G,IGFBP3,LMNA,SOCS1,SOCS3	370 (18)
TOPBP1		other	Inhibited	-2.201	1.19e-05	BBC3,CDKN1A,GADD45A,HIC1,IGFBP3,MYC	361 (18)
(-)-norephedrine		chemical drug	Inhibited	-2.449	1.19e-05	CYP51A1,FDFT1,HMGCR,HMGCS1,IDI1,MSMO1	248 (9)
isoquercitrin		chemical drug	Inhibited	-2.433	1.19e-05	ACAT2,CYP51A1,FDFT1,HMGCR,INSIG1,MSMO1	206 (6)
RPTOR		other		-0.082	1.22e-05	BCL3,CCND1,CCND2,CDK2,Chil3/Chil4,CYP51A1,DHCR24,FDFT1,HMGCR,HMGCS1,IDI1,IFI44,JUN,MSMO1,MYC,SHH,SOCS3,SQSTM1	428 (22)
AXIN1		other		-0.633	1.26e-05	CCND1,CCND2,CD274,CSRNP1,FOS,JUP,TUBB3	395 (21)
SMARCB1		transcription regulator		0.627	1.27e-05	A2M,ALX4,ATP1B1,BAG3,BCL2L11,BMP4,C4A/C4B,CCND1,CDKN1A,CDT1,COL18A1,CTTN,CYP39A1,CYP4F8,DSG2,FOS,GJA1,GSN,HEY1,JUP,MYC,PAX2,STAT3	376 (19)
YAP1		transcription regulator		0.933	1.3e-05	ACAT2,ADAMTS1,BCL2L11,BMPR1B,CCND1,CD274,CDK2,CDKN1A,Chil3/Chil4,CYP11A1,DDAH1,EGR1,EGR2,EHD1,FGF1,FLNA,FOS,GADD45A,HMGCR,HMGCS1,ITGA5,LMNA,LPL,MYC,MYH9,NUPR1,OLFM4,PDK4,PTGFR,RASSF4,SERPINE1,SHH	420 (22)
TRH		other		0.705	1.33e-05	CDK14,DUSP1,FOS,JUN,JUNB,KRT6B,PRLR,TRHR,VIP	381 (23)
FGFR3		kinase		0.896	1.33e-05	BMP4,CCL4,CCND1,CD274,CDKN1A,COL3A1,FOS,MMP9,SPP1	312 (20)
GNB1		enzyme			1.33e-05	AHR,CCL4,CD83,CDKN1A,DUSP1,FOSB,FOSL2,PDE4B,TSC22D3	370 (19)
sucrose		chemical - endogenous mammalian		-0.151	1.33e-05	CRH,DDAH1,ELOVL6,FOS,FOSB,HMGCR,MLXIPL,SCD,SNAP25	281 (11)
TICAM1		other	Activated	2.049	1.35e-05	ACOD1,BCL3,CCL4,CH25H,CMPK2,DUSP1,EDNRB,EGR1,IFIT3,MAFF,Mx2,Nes,NOX4,PDE4B,SERPINE1,SOCS1,SOCS3,ZC3HAV1	361 (17)
losartan potassium		chemical drug		-1.692	1.35e-05	APLN,BMP7,Chil3/Chil4,COL3A1,EGR1,FOS,GBP6,GJA1,LRRC55,MMP9,NOX4,PLCB1,S100A9,SERPINE1,SOCS3,SPP1,STAT3,TUBB3	364 (19)
NFE2L2		transcription regulator	Activated	2.687	1.35e-05	ADAMTS1,ADCYAP1,AHR,ARHGEF3,ATF3,CALB1,CCL4,CDKN1A,COL3A1,COL4A2,DDIT3,GADD45G,GBE1,GPX3,GSTM1,GSTM5,HMOX1,IL1RN,LMNA,LPL,MAFF,MAPK10,MGST3,MMP9,MSMO1,Mt1,OSGIN1,PHGDH,PSAT1,PSMD5,RELA,RUNX1T1,SCD,SERPINE1,SHMT2,SLC1A4,SLC7A11,SOCS3,SOD3,SQSTM1,SRXN1,VSNL1	308 (17)
IL10RA		transmembrane receptor		0.811	1.37e-05	ACOD1,BMP4,CACHD1,CALHM6,CFTR,CLEC4E,CYP2S1,EDNRB,ETV1,FADS3,FBN1,GBP6,GSTM1,GSTM5,HLA-A,IL1RN,KITLG,OGN,OLFM4,PARVG,PCOLCE,PDGFRA,REPS2,Serpina3g (includes others),SLC7A11,SOCS3,STAT3,TGM2,TRPM2	214 (13)
GATA3		transcription regulator		-0.361	1.38e-05	CCL4,CCND1,CDKN1A,CRABP2,CYP11A1,DLX3,EBF1,ELOVL1,ELOVL6,EOMES,ESR1,FOS,GLUL,GREB1,MYC,MYO10,NFIL3,RUNX1,S100A9,SLC27A2,SPRR1A,Sprr2g,TGM2,ZIC2,ZNF217	368 (24)
BMP10		growth factor		0.794	1.41e-05	A2M,APLN,CD274,CD83,CMPK2,COL1A2,COL3A1,EGR2,FOS,HEY1,HLA-A,IGFBP7,Serpina3g (includes others),TBX20	175 (7)
trinitrobenzenesulfonic acid		chemical reagent	Activated	2.118	1.41e-05	CCL4,CD68,CLDN1,CLEC4D,CLEC4E,COL1A2,COL3A1,CYP11A1,FOS,MMP9,NR1H4,S100A9,SOCS3,TNFRSF12A	385 (19)
TWIST2		transcription regulator		-0.915	1.43e-05	CCND1,CDKN1A,DDIT3,FBLN5,HOXB9,KLF6,MGST3,MMP9,OSGIN1,RELA	150 (7)
K+		chemical - endogenous mammalian		-0.279	1.43e-05	ADCYAP1,ATF3,BCL2L11,CYP11A1,EGR1,FOS,Hrk,JUN,NPTX1,Sik1	360 (20)
NTRK2		kinase		1.069	1.43e-05	BCL2L11,CCND1,CCND2,CDKN1A,CEBPB,EGR1,FOS,Muc1,MYC,PVALB,SERPINE1,SNAP25,SPP1	337 (20)
pirinixic acid		chemical toxicant		1.997	1.5e-05	ACAT2,ACOT2,ANXA2,BMP7,CCND1,CD63,CDK2,CDKN1A,CYP7B1,ELOVL1,ELOVL6,GADD45A,GADD45B,GBE1,GLUL,Gm26588,GPR22,HMGCR,HMGCS1,HMOX1,HSPB1,IL1RN,INSIG1,JUNB,KLF10,LAMB3,LDHB,LGALS3,LPL,MGST3,MMP9,MYC,PCK2,PDK4,SCD,SERPINE1,SLC27A2	323 (19)
RARA		ligand-dependent nuclear receptor		0.821	1.53e-05	AR,ATF5,CALB1,CCND1,CDKN1A,CEBPB,CRABP2,CRH,CYP26A1,DUSP1,EGR1,EGR2,EGR3,EIF5A2,FGF12,FOS,FOSL2,GAP43,GREB1,HELLS,IFI44,INSL3,JUN,JUP,LTF,MYC,PHLDB1,RUNX1,Serpinb6c,SLC7A11,SPP1,ZMAT4	410 (23)
sirolimus		chemical drug	Inhibited	-2.06	1.55e-05	AR,BBC3,BCL2L11,BCL3,CCND1,CCND2,CD274,CD68,CDA,CDKN1A,CEBPB,CHRNB4,CLIC1,COL1A2,DDIT3,EGR1,EGR2,FGF9,FOS,GAP43,HMOX1,IDI1,IL27,JUN,JUNB,LDHB,LGALS3,LMNA,MMP9,Mt1,MTHFD2,MYC,OLFM4,PDGFRA,PIM1,PLAUR,PTP4A1,RCAN2,RELA,RHOQ,SCD,SERPINE1,SLC3A2,SLC7A11,SLC7A5,SOCS3,SQSTM1	353 (18)
MEF2C		transcription regulator		1.064	1.59e-05	ATF3,CCBE1,CCL4,CDKN1A,CLSTN2,COL1A2,COL3A1,EGR2,FOS,FOSB,FRZB,GJA1,HDAC9,JUN,JUNB,SMYD1,TNNT2	318 (15)
SREBF2		transcription regulator		-1.902	1.6e-05	BMP4,CDKN1A,CYP51A1,CYP7B1,ELOVL6,FDFT1,GLI2,HMGCR,HMGCS1,IDI1,INSIG1,MSMO1,SCD,STARD4	398 (23)
cadmium chloride		chemical toxicant	Activated	2.613	1.6e-05	AR,CCND1,DDIT3,FOS,GADD45A,GSTM1,HMOX1,HSPB1,HSPB8,JUN,MAFF,Mt1,MYC,SQSTM1	350 (20)
MYF6		transcription regulator		1.309	1.67e-05	APLN,BRINP3,CCL28,CDKN1A,CTSH,FGF9,GSN,IGFBP3,IL1RN,LIF,LTF,MSTN,SERPINE1,SERPINF1,SPP1
CD24		other		0.314	1.67e-05	ATF3,CDKN1A,CFTR,CHAC1,CTTN,EMP3,FOS,HSPB8,JUN,LAT2,NAGK,PLCB1,PTP4A1,SPHK1,TTC3	318 (18)
calcipotriene		chemical drug	Activated	2.03	1.67e-05	FOS,FOSL1,JUN,JUNB,PLAUR,PRKCD,SERPINE1,SPP1	309 (18)
Stat5 dimer		complex		1.069	1.67e-05	BCL6,CCND1,CCND2,EBF1,IGFBP3,MYC,SOCS1,SOCS3
NR2E1		ligand-dependent nuclear receptor			1.67e-05	AR,CCND1,CDKN1A,MAPK10,MYC,POU4F1,POU4F2,POU4F3	381 (20)
OXT		other		-1.04	1.67e-05	CEBPB,CRH,ESR1,FOS,GJA1,LPL,RGS2,SCD	408 (23)
IL21		cytokine		1.894	1.7e-05	BCL2L11,BCL6,CALHM6,CCL4,CCND2,CDKN1A,CMPK2,EGR1,EOMES,GBP6,IFIT3,MMP9,Mx2,MYD88,RUNX1,Serpina3g (includes others),SOCS1,SOCS3,STAT3,TIRAP	358 (19)
pifithrin alpha		chemical reagent		-1.018	1.75e-05	AR,BBC3,CDKN1A,HMOX1,RELA,SH2D1A,SQSTM1	355 (21)
concanavalin a		chemical drug		0.83	1.76e-05	BCL2L11,CCL4,CDKN1A,EGR1,EGR3,HELLS,HTR1A,HTR1B,IL1RN,IL27,MMP9,PRLR,RGS2,RIPK1,SIPA1,SOCS3,SPP1	320 (21)
2-hydroxy-1-naphthylaldehyde isonicotinoyl hydrazone		chemical reagent		-0.492	1.79e-05	CCND1,CCND2,CDK2,CDKN1A,GADD45A	264 (7)
daidzein		chemical drug		-0.832	1.81e-05	A2M,ADK,CCND1,ESR1,FOLR1,FOSB,HLA-A,HMGCR,HMOX1,Igkv1-117,MYC,PRLR,PTPN6,RASGRP1	501 (25)
di-2-pyridylketone 4-cyclohexyl-4-methyl-3-thiosemicarbazone		chemical drug		0.256	1.84e-05	AR,CCND1,JUN,MYC,RELA,SHH	482 (27)
NR1I3		ligand-dependent nuclear receptor		1.448	1.87e-05	AHR,CDKN1A,CYP39A1,CYP7B1,EIF4EBP1,GADD45B,GSTM1,GSTM5,HK1,INSIG1,MAFF,Mt1,MYC,SCD,TUBA4A	276 (7)
BCL2		transporter		-0.791	1.87e-05	BBC3,BCL2L11,CCND1,CDKN1A,CTSH,FOS,GADD45A,GAP43,Hrk,MMP9,NSG2,PLAUR,SNAP25,SPHK1,SQSTM1	390 (18)
NFATC2		transcription regulator		-0.479	1.88e-05	BCL2L11,CD274,CD83,CDKN1A,CMPK2,EGR2,EGR3,ENPP2,GPNMB,IFIT3,IL27,JUN,Mx2,MYC,NOX4,PLAT,POU3F2,RGS2,SLC3A2,SLFN12L,SOCS1,SOCS3	385 (18)
miR-1-3p (and other miRNAs w/seed GGAAUGU)		mature microRNA		-0.84	1.88e-05	ANXA2,CAND1,CDK14,CHST11,ESR1,FAM81A,FBLN2,GJA1,MRC2,MTHFD2,NETO2,NOTCH3,PDLIM7,PGM2,PLEKHG2,POLA2,SHTN1,SPHK1,SRXN1,TAGLN2,TPPP
PPARD		ligand-dependent nuclear receptor		-1.113	1.89e-05	ADORA1,C1QC,CCND1,CCND2,CD68,CDK2,CEBPB,CH25H,Chil3/Chil4,CYP39A1,CYP7B1,EGR1,ESR1,GLI2,HMGCR,HMGCS1,LDHB,LPL,MMP9,NR1H4,OAF,PDK4,PLAT,RASGRP1,SCD,SLC27A2,STBD1,TNFRSF12A	366 (22)
10E,12Z-octadecadienoic acid		chemical - endogenous mammalian		1.848	1.92e-05	ALX4,APLN,ATF3,CDK18,DDIT3,EBF1,EGR2,FOLR1,GPRIN3,IGFBP3,IL1RN,ITPKA,NPTX1,PANK1,PBXIP1,PODN,SCD,TRIB3,Zfp185	303 (15)
mir-223		microRNA		1.434	1.96e-05	ALCAM,CCND1,CD274,CLEC4E,CRHBP,EGR2,EGR3,EMP1,GSTM5,HMGCS1,IL1RN,LPL,MSMO1,RAB38,RIPK1,S100A9,Serpina3g (includes others),STAT3	384 (18)
IL1		group	Activated	3.485	2.01e-05	ADAMTS1,AHR,AR,CCL4,CDKN1A,CRH,DUSP1,EGR1,FOS,GJA1,HMGCR,HMOX1,IL1RN,JUN,KITLG,KLF6,LIF,MMP9,MYC,NR1H4,PDGFRA,RELA,S100A9,SERPINE1,SOCS3,SPHK1,TGM2,THY1,TNFAIP6,TNFRSF1B,TNFRSF4	357 (17)
POU2F1		transcription regulator			2.04e-05	A2M,BBC3,BCL6,CCND1,CD79A,ESR1,GADD45A,GPX3,GSTM1,GSTM5,LPL,RELA,SESN2,SLC7A11,SPP1,VIP	330 (13)
KCNK9		ion channel		-1.066	2.06e-05	A2M,ACVR1C,CALB1,ECEL1,GADD45B,GAL,HTR1B,NEFL,SNCG
IL11RA		transmembrane receptor			2.07e-05	CCL4,FOS,GBX2,JUNB,MMP9,Muc1,MYC,PIM1,SOCS3,STAT3	256 (20)
ESRRA		transcription regulator		0.784	2.08e-05	APLN,CCL28,COL4A1,COL4A2,CTSH,CYP51A1,EGR3,FGF1,HK1,HMGCR,HMGCS1,HMOX1,IDI1,LDHB,LPL,LTF,MMP9,MYH9,PCK2,PDK4,PLXND1,PRKCD,SEMA6A,SPP1,TNFRSF12A,VASH2	352 (13)
SOX1		transcription regulator		-0.577	2.08e-05	BMPER,CYP26A1,DSP,DUSP1,EOMES,FRZB,GREB1,PCDH18,PDGFRA,POU4F1,TEAD2,WLS
5-O-mycolyl-beta-araf-(1->2)-5-O-mycolyl-alpha-araf-(1->1')-glycerol		chemical - endogenous non-mammalian		1.387	2.12e-05	ATF3,BCL3,CCL4,CD83,DUSP1,EGR2,GPAT3,IFIT3,MMP9,PDE4B,SLC7A11,SOCS3,SPHK1	345 (11)
3,4,5,3',4'-pentachlorobiphenyl		chemical toxicant		0	2.12e-05	ACOT2,BMP4,CALB1,CCND2,ESR1,FGF9,GADD45A,IGFBP3,ITGA7,JUN,PRKAR2B,PTGFR,RESP18	472 (24)
mir-154		microRNA	Inhibited	-2.278	2.16e-05	ADAMTS1,BCL2L11,CCND1,HMOX1,KLF10,MYC,PLAUR,STAT3	362 (20)
NCOR2		transcription regulator		-0.374	2.18e-05	AR,CCND1,CDKN1A,CRH,FOLR1,FOS,JUN,LPL,MYC,NFAM1,PGR	425 (24)
troglitazone		chemical drug		0.598	2.21e-05	ACOT2,ANXA2,AR,ATF3,CCND1,CCND2,CDK2,CDKN1A,COL1A2,COL4A1,DDIT3,EGR1,FOS,FOSL1,GADD45A,HMOX1,JUN,KIF14,LPL,MLXIPL,MMP9,MYC,NAGK,NOTCH3,PDGFRA,PDK4,RELA,SCD,SDC1,SERPINE1,SPP1,TRIB3,TST	373 (20)
UBA1		enzyme		-1.89	2.38e-05	ANXA2,CCND1,DDIT3,HSPB1,NEFL,TAGLN2,TUBA1C
HOXA5		transcription regulator		1.622	2.38e-05	CDKN1A,EGR1,GADD45B,IER2,KLF10,PGR,SHH
CSNK2A1		kinase		1.195	2.38e-05	AHR,CCND1,EOMES,GNAL,ITGA3,JUP,RELA	335 (17)
ATM		kinase		0.83	2.4e-05	BBC3,CCND1,CDKN1A,DUSP1,GADD45A,GADD45B,GADD45G,HMOX1,JUN,PPP2R2C,SERPINE1,TGM2	333 (18)
Map3k7		kinase		0.532	2.4e-05	AR,BMP4,CCL4,CMPK2,EGR2,JUN,MMP9,Mx2,RUNX1T1,S100A9,SCD,SPHK1	375 (19)
RBPJ		transcription regulator		-1.636	2.48e-05	ARHGEF4,BMP7,CCND1,CDKN1A,CYP11A1,DUSP1,FGF1,FGF9,FOS,GNAI1,HEY1,INHBB,JUN,KITLG,LIF,MDK,MSTN,MYC,SDC1	367 (21)
N-acetyl-L-cysteine		chemical drug	Inhibited	-2.68	2.52e-05	AR,BCL2L11,CCND1,CCND2,CD274,CDKN1A,CFTR,DDIT3,DUSP1,EGR1,FOS,GJA1,HDC,HMOX1,JUN,LPL,MMP9,MYC,OSGIN1,PGR,PHGDH,PLAUR,RELA,SERPINE1,SPP1	337 (18)
ATF1		transcription regulator		1.94	2.53e-05	CD79A,CEBPB,COL24A1,CYP51A1,EGR1,FOS,FOSL1,HMOX1,JUN	279 (12)
RETN		other		1.473	2.55e-05	FOS,HMOX1,LPL,MYC,PLAT,RELA,SCD,SERPINE1,SOCS3,SPP1,STAT3	355 (24)
GLI3		transcription regulator		1.5	2.58e-05	BMP4,CCND1,CCND2,DLL3,DUSP1,EBF1,EGR1,FOSB,GLI2,JUNB,PAX2,RUNX1,SFRP1,SHH
BMP2		growth factor		1.33	2.62e-05	BMP4,CALB1,CCND1,CDKN1A,CLIC4,COL1A2,DLX3,FGF12,FOS,FOSB,GADD45B,HEY1,IGFBP3,JUN,JUNB,KLF10,MMP9,MYC,Nes,NTRK3,SPP1,TGM2,TUBB3	382 (21)
FOXM1		transcription regulator	Activated	2.251	2.7e-05	AR,CCL4,CCND1,CCND2,CDK2,CDKN1A,ESR1,FOS,IL1RN,ITGA5,JUN,MMP9,MYC,Nes,PLAUR,RELA,SFRP1,SQSTM1,STAT3	399 (22)
MUC1		other		1.889	2.74e-05	CCND1,CCND2,CD83,CDA,DDIT3,DNMT3B,IFIT3,Ifitm1,Mx2,MYC,POLD4,PYCR1,RELA	309 (19)
PXDN		enzyme	Inhibited	-2.449	2.75e-05	CDKN1A,DUSP1,JUN,KLF6,MYC,NFIL3
HOXB4		transcription regulator		1.633	2.75e-05	CCND2,FOSL1,GPX3,JUNB,MYC,PGR	208 (7)
CR1L		transmembrane receptor	Inhibited	-2.804	2.75e-05	COL18A1,COL1A2,COL3A1,COL4A1,COL4A2,COL6A3,FBN1,SERPINE1	186 (7)
mibolerone		chemical drug		-0.176	2.83e-05	AHR,ALCAM,AR,C4A/C4B,CCND1,COL1A2,COL6A3,CYP51A1,FOSL2,GADD45G,GPNMB,HMGCS1,IGFBP3,JUN,KLF10,LPL,MYC	325 (7)
REL		transcription regulator		1.502	2.86e-05	ADK,AHR,BBC3,BCL3,CCL4,CCND1,CCND2,CDKN1A,EGR2,ESR1,FOS,FOSL1,GADD45B,HLA-A,IL27,JUN,JUP,MMP9,MYC,PHGDH,RDH10,RELA,STAT3,TNFRSF4	373 (18)
TRIM24		transcription regulator		0.302	2.89e-05	CALB1,CALHM6,CCL4,CMPK2,DDX60,EMB,FBN1,GLUL,IFI44,IFIT3,LGALS3,PRKCQ,SERPINE1,SOCS1,SPP1	265 (18)
NCOR1		transcription regulator		-1.572	2.89e-05	BCL3,CCND1,CDKN1A,CRH,DDX60,DUSP1,HK1,IFIT3,MMP9,MYD88,PDK4,RELA,SERPINF1,SLC25A45	383 (25)
IPMK		kinase	Activated	3.111	2.94e-05	AHR,FLNA,FLNC,FOS,FOSB,ITGA3,JUN,JUNB,MYC,TAGLN2	346 (20)
RORC		ligand-dependent nuclear receptor			2.98e-05	ACOT2,ATP1B1,COL1A2,COL3A1,CYP39A1,CYP4F8,CYP7B1,DHCR24,ELOVL6,FDFT1,GADD45B,GFPT2,HMGCR,MGST3,Mt1,MYC,NAT2,S100A9,SLC29A4,SLC2A13,SLC7A5
SERCA		group		-1.961	3.07e-05	EGR1,FOSL1,JUN,MYC	328 (19)
vanillyl-N-nonylamide		chemical drug			3.07e-05	ATF3,CCND1,DDIT3,GADD45A	200 (8)
CBLC		enzyme		-1.982	3.07e-05	DDIT3,HMOX1,NOX4,SQSTM1	224 (13)
Gm35986		other		1.98	3.07e-05	FDFT1,HMGCR,HMGCS1,IDI1
6-cyano-7-nitroquinoxaline-2,3-dione		chemical reagent		-1.997	3.07e-05	EGR1,FOS,JUN,JUNB	318 (16)
SNAI2		transcription regulator		-1.949	3.1e-05	AR,BBC3,BCL2L11,CCND1,CDKN1A,CLDN1,DSP,EGR2,ITGA3,JUP,MMP9,STAT3,TNNT2	287 (20)
CISH		other	Inhibited	-2.309	3.16e-05	CCL4,CLEC4E,EOMES,HDC,HMOX1,MYC,PLAUR,SLC7A11,SORL1,SPHK1,SPP1,SQSTM1	290 (17)
L-serine		chemical - endogenous mammalian		-1.032	3.18e-05	CCND1,CDKN1A,PCK2,PHGDH,PSAT1	203 (7)
MBOAT7		enzyme	Activated	2.236	3.18e-05	DHCR24,ELOVL6,HMGCR,HMGCS1,SCD	176 (7)
PPP1R15B		phosphatase	Inhibited	-2.2	3.18e-05	CHAC1,DDIT3,NUPR1,SESN2,TRIB3	76 (3)
SLC7A5	0.363	transporter		-1.109	3.18e-05	CHAC1,DDIT3,PCK2,SLC3A2,TRIB3	175 (8)
KLB		enzyme		0.849	3.18e-05	CCND1,EGR1,FOS,HMGCR,HMGCS1	299 (17)
FGF4		growth factor		-1.536	3.2e-05	CD68,CDKN1A,FOS,HMGCR,HMGCS1,SCD,SHH	338 (19)
bisindolylmaleimide I		chemical drug	Inhibited	-2.102	3.21e-05	CCND2,CDKN1A,CLCF1,CLDN1,EGR1,EIF4EBP1,FOS,GAP43,HMOX1,LPL,MMP9,Mt1,PRKCD,SERPINE1,TNNT2	364 (21)
F2RL1		G-protein coupled receptor		0.421	3.24e-05	ALKAL2,ANGPTL2,ATF3,BCL3,FOS,GBP6,ITGA7,KITLG,LIF,MMP9,RAB27A,Serpina3g (includes others),SPRR1A,VGF	395 (19)
lactacystin		chemical - protease inhibitor	Activated	2.684	3.46e-05	ATF3,BAG3,CCND1,CCND2,CDKN1A,CLIC1,DDIT3,DUSP1,ESR1,FOSL1,GJA1,GNAI1,HLA-A,HMOX1,HSPB1,HSPB8,MMP9,PRLR,SLC3A2,SQSTM1,TUBB4A	412 (22)
THEM6		other		0.194	3.48e-05	ATF3,CYB5R2,CYP51A1,DDIT3,FDFT1,HMGCS1,MSMO1,NIBAN1
TSC22D3	-0.305	transcription regulator		-0.817	3.49e-05	BBC3,BCL2L11,CCND1,CD274,CD83,CDKN1A,DUSP1,EDIL3,EGR2,EGR3	359 (19)
TAC1		other		1.345	3.51e-05	CCL4,FOS,FOSB,HDC,HMOX1,HTR1A,IL1RN,KCND2,KITLG,Nefm,PLAT,SERPINE1,SERPINI1	329 (19)
FOSL1	0.76	transcription regulator		-1.269	3.51e-05	CCL4,CCND1,EGR1,EGR2,EHD1,FOS,FOSB,FOSL1,JUN,JUNB,MMP9,PLAUR,SERPINE1	359 (20)
T-5224		chemical reagent		1.291	3.56e-05	ADAMTS1,CRYBG1,CYP51A1,EGR1,FGF12,FLRT2,GADD45B,HMGCS1,JUN,KCTD11,NIBAN1,RGS2,RUNX1,SOCS3,TRIB3
IL11		cytokine	Activated	2.71	3.61e-05	A2M,ANXA2,EZR,FOS,JUN,JUNB,MMP9,SOCS3,SPHK1,SPP1,STAT3,VIP	302 (20)
TSC1		other		-0.676	3.62e-05	DDIT3,EGR2,ELOVL1,FLNA,GLUL,HMOX1,LDHB,LITAF,MLXIPL,NIBAN1,NKD1,OLFM4,PDGFRA,SCD	378 (23)
N-nitro-L-arginine methyl ester		chemical drug		1.263	3.62e-05	APLN,ATF3,CD68,CD83,CDK14,COL1A2,COL3A1,GJA1,HMGCR,HMOX1,INSIG1,MMP9,PDK4,SERPINE1	391 (21)
CAV1		transmembrane receptor		0.251	3.63e-05	ACVRL1,ADGRG2,BCL2L11,CCND1,CDKN1A,EDIL3,EGR1,ESR1,FOLR1,FOS,GRIN2A,GRM1,HMOX1,INHBB,KRT6B,PRLR,SERPINE1,SPRR1A	444 (23)
RET		kinase		0	3.63e-05	BBC3,CALB1,CCND1,COL1A2,DUSP8,EDNRB,EGR1,ETV1,FOS,GJA1,MMP9,PLAUR,PRKCD,S100A9,TAGLN2,TNNT2,VGF,VIP	328 (17)
DNMT3A		enzyme	Inhibited	-2.593	3.72e-05	ADORA1,AKAP12,APLN,ATF3,BCL2L11,CD79A,DNMT3B,ECEL1,JUN,Mt1,P2RY1,PIK3CD,PPP1R14C,PRKAR2B,RCAN2,S100A9,SOCS3,SPHK1,SPP1,TGM2,TNNT2	379 (20)
IFN Beta		group		0.93	3.72e-05	ACOD1,ATF3,CD274,CD79A,CD83,CDKN1A,CEBPB,CMPK2,DUSP1,HLA-A,IFI44,IFIT3,IL1RN,IL27,INSIG1,MMP9,Mx2,MYC,NELL2,SERPINE1,SLC7A11,SOCS1,SPHK1,SPP1	348 (17)
mir-155		microRNA	Inhibited	-2.095	3.73e-05	ANXA2,BCL6,CCND1,CD68,CDKN1A,CEBPB,CLDN1,DYNC1I1,HMOX1,IFIT3,MYD88,RELA,RIPK1,SERPINE1,SOCS1,SOCS3,STAT3	365 (20)
TLR4		transmembrane receptor		1.726	3.74e-05	ARID5A,ATF3,CAST,CCL4,CCND2,CD274,CMPK2,DDIT3,FOS,GADD45G,GJA1,HDC,HMOX1,IFIT3,IL27,MMP9,Mx2,MYC,MYD88,NR1H4,PGR,PLA1A,PLAT,PTGFR,RELA,RUNX1,SLC7A11,SLFN12L,SOCS1,SOCS3,SPHK1,SPP1,SQSTM1,STAT3	402 (17)
miR-92a-3p (and other miRNAs w/seed AUUGCAC)		mature microRNA	Inhibited	-2.469	3.76e-05	BCL2L11,CCND1,CCND2,CDK2,CDKN1A,EDNRB,ITGA5,NOX4,VSNL1	322 (12)
IRS2		enzyme		-0.053	3.76e-05	CCND1,EGR1,FOS,GCKR,HMGCR,HMOX1,LPL,MYC,RELA	419 (23)
CDKN2A		transcription regulator		0.766	3.81e-05	A2M,BBC3,BCL2L11,CCL4,CCND1,CD274,CD79A,CDK2,CDKN1A,CEBPB,DUSP1,EBF1,EGR1,EGR2,FOS,GADD45G,GLUL,HOXB9,JUN,KITLG,LGALS3,MMP9,MYC,NOX4,PHGDH,PSAT1,PYCR1,RAB27A,SERPINE1,SH3BP2,TNFRSF1B	339 (21)
RORA		ligand-dependent nuclear receptor		-0.896	3.88e-05	ACOT2,ATP1B1,CCL4,CDKN1A,CH25H,CYP39A1,CYP4F8,CYP7B1,DHCR24,ELOVL6,FDFT1,GADD45A,GADD45B,HMGCR,MGST3,Mt1,NAT2,S100A9,SCD,SLC29A4,SLC2A13,SOCS3	266 (9)
OGT		enzyme		-0.254	3.95e-05	CCND1,CDKN1A,FOS,GAP43,GLI2,GNG4,HMGA1,JUN,JUP,LPL,MYC,PCDH20,SHH,SQSTM1,THY1	423 (25)
N(6)-(3-iodobenzyl)-5'-N-methylcarboxamidoadenosine		chemical drug		-0.297	3.99e-05	CCND1,ESR1,FOS,MYC,RGS2,RGS4	268 (17)
CSF2RB		transmembrane receptor	Activated	2.415	3.99e-05	CCND2,FOS,JUN,JUNB,MYC,PIM1	314 (21)
acyclic retinoid		chemical drug		-1.8	3.99e-05	CCND1,CDKN1A,COL1A2,COL4A2,MYC,PDGFRA	348 (24)
FGF1	-0.659	growth factor	Activated	2.282	4.09e-05	AHR,CCND1,CD68,CDKN1A,EGR1,FOS,GADD45G,GSTM1,GSTM5,HMOX1,JUN,MYC,NOTCH3,SPP1,TGM2,TNFRSF12A	390 (22)
dimethyl sulfoxide		chemical drug		0.871	4.09e-05	B3GNT8,BMP4,CCND2,CEBPB,DDIT3,EIF4EBP1,EMP3,FOS,FRZB,HMOX1,JUN,LPL,MYC,NUPR1,PBXIP1,SQSTM1	394 (20)
MTORC1		complex		0.406	4.12e-05	AHR,CCND1,CYP11A1,HMGCR,IDI1,INSIG1,MYC,NFIL3,NOX4,SCD	403 (23)
TCF7L2		transcription regulator		-1.033	4.16e-05	ADGRG1,AR,BMP4,CCND1,CCND2,CDKN1A,CLDN2,CYP51A1,DHCR24,EFNB1,ELOVL1,ENPP2,FGF1,FOS,GLUL,GSN,HOXB9,IL1RAP,JUN,KCNJ3,KNDC1,LGI3,LRRN1,MYC,PLAT,PLAUR,PPP1R16B,SLC27A2,SPP1,SQSTM1,STAT3,TMEM163,TPPP,TSPAN2,UGT8	444 (26)
tofacitinib		chemical drug		-1.941	4.23e-05	CCND1,IFIT3,JAK3,MYC,SOCS1,SOCS3,STAT3	276 (19)
AZGP1		transporter		-1.195	4.23e-05	BMP4,CCND1,CEBPB,DSP,EGR1,ITGA5,MYC	331 (26)
FMR1		translation regulator		-0.764	4.3e-05	ATF3,BAG3,CACNB4,CLSTN2,EGR3,GABRG2,GAP43,IRX2,KCND2,LYNX1,MMP9,PCDH10,PLAT,RPRM,SNAP25,TAGLN2,VGF,ZCCHC12
PAX3-FOXO1		fusion gene/product		-1.868	4.35e-05	AKAP12,CCND1,CCND2,CD63,CDKN1A,CLIC1,DUSP1,EDIL3,EMB,FDFT1,FLNA,FLNC,FOSL1,HEY1,HMOX1,HOXB9,Ifitm1,ITGA5,MVP,MYH9,OGN,PDE4B,SDC1,SLC7A5,SPP1,TNNT2	279 (13)
PRKCZ		kinase		-0.255	4.36e-05	CCND1,COL1A2,HMOX1,JUN,MMP9,MYC,PHGDH,PSAT1	369 (20)
calcimycin		chemical reagent	Activated	3.067	4.37e-05	AR,ATF3,BCL2L11,CD83,CRH,CYP11A1,DDIT3,EGR1,FOS,FOSB,FOSL1,JUN,JUNB,MYC,SERPINE1	367 (20)
ANGPT2		growth factor	Activated	2.069	4.45e-05	ARHGEF2,BCL2L11,CD68,CDKN1A,CEBPB,COL18A1,COL1A2,COL3A1,CRH,CYP51A1,DDIT3,HMGCS1,HMOX1,MAPK10,MMP9,NOX4,RDH10,SERPINE1,SOD3,SRXN1,TNFRSF12A,TUBB3	310 (19)
fenofibrate		chemical drug		-0.062	4.46e-05	ACOT2,AR,BCL2L11,CCND1,CD68,CEBPB,CYP11A1,DDIT3,GADD45A,GBE1,GLUL,GPR22,HMOX1,JUN,LDHB,LPL,MSTN,PANK1,PCK2,PDK4,RELA,SCD,SERPINE1,SLC27A2,STAT3	323 (23)
SAMSN1		other		0.832	4.46e-05	ARID5A,CCL4,CCND2,CMPK2,HDC,IFIT3,Mx2,PLA1A,PLAT,SDC1,SLFN12L,SOCS1,SOCS3	189 (10)
mir-34		microRNA		-1.463	4.52e-05	AR,CCND1,CCND2,EFNB1,EMP1,FOSL1,GNAI1,HEY1,KLF10,MYC,SATB2,SEMA3C,SLC7A11,TUBB3	371 (24)
BMP6		growth factor	Activated	2.274	4.52e-05	ADAMTS1,BMP4,CDKN1A,CYP11A1,CYP39A1,FOSL1,HMOX1,INHBB,ITGA5,MATN2,SCEL,SEMA3A,SERPINE1,TNFRSF12A	307 (20)
PLAUR	3.397	transmembrane receptor		-1.316	4.54e-05	CCND1,FOSL1,JUN,JUNB,MMP9,MYC,PLAUR,SCN2A,SOCS1	342 (21)
MRGPRX3		G-protein coupled receptor	Activated	2.333	4.54e-05	ACOD1,CCL4,CD274,CLEC4E,IL1RN,KCTD11,S100A9,SLFN12L,TNFRSF1B
SOX7		transcription regulator		-0.905	4.62e-05	ACOD1,ADGRG1,COL4A1,COL4A2,CRABP2,DLX3,GBX2,HSPG2,PAX2,SPRR1A,ZIC2
HAND2		transcription regulator		-0.581	4.62e-05	ALX4,CALB2,CCBE1,CCL4,CLSTN2,COL1A2,COL3A1,GJA1,SHH,TNNT2,XIRP2
FGF21		growth factor		-0.745	4.69e-05	CCND1,CD68,COL3A1,DDIT3,EGR1,FOS,MMP9,PDK4,PHGDH,RELA,SCD,SERPINE1	343 (23)
captopril		chemical drug		1.772	4.69e-05	A2M,C4A/C4B,CACNG5,EFEMP2,HMOX1,IL1RN,LGALS3,MMP9,S100A10,SHH,SPP1,TNFRSF12A	343 (17)
ETV5		transcription regulator		-1.508	4.83e-05	ALCAM,CCND1,CDKN1A,CLDN1,ITGA5,LGALS3,LGI3,NCAM2,PLAUR,RAB27A,SCD,SHH,SPP1,TINAGL1,TNFRSF1B	269 (11)
KLF11		transcription regulator		1	4.93e-05	ADAMTS1,BMP7,CEBPB,CHRNA6,CHRNB3,CHRNB4,COL1A2,COL3A1,ITGA3,LTBP1,MMP9,MYC,PCK2,PDK4,PLAT,SERPINE1	293 (12)
WNT5A		cytokine		-0.821	4.97e-05	BRINP3,CCND1,CYB5R2,CYP11A1,ENPP2,ESR1,FLNA,GABRG2,GJA1,HMOX1,INHBB,LAMB3,MMP9,MYC,PRLR,PRSS12,ROR2,SDC1,SOCS3,SPP1,STAT3	411 (25)
SPI1		transcription regulator		-0.243	5e-05	BCL6,C1QC,CCL4,CCND1,CCND2,CD68,CD79A,CDK2,CDKN1A,CMPK2,EBF1,EGR2,FOS,GPR84,HIC1,IFI44,IFIT3,IL1RN,IL27,ITGA5,JUN,LILRB3,LTF,MYC,PTPN6,RELA,SPP1	360 (21)
CHRM3		G-protein coupled receptor		1.067	5.28e-05	EGR1,FOS,HMOX1,ITGA3,MMP9	285 (18)
SOX3		transcription regulator		-0.577	5.33e-05	BMPER,CYP26A1,DSP,DUSP1,EOMES,FRZB,GREB1,PCDH18,PDGFRA,POU4F1,TEAD2,WLS
IL1RN	1.851	cytokine		-1.167	5.41e-05	ATF3,CDKN1A,CHAC1,CRH,GJA1,HDAC9,IFI44,IFIT3,KLF6,LIF,MMP9,RELA,RIPK1,S100A9,SERPINE1,SPP1	397 (19)
TRIB3	0.52	kinase		-1.294	5.41e-05	BCL2L11,DDIT3,MTHFD2,PCK2,PSAT1,SQSTM1,STC2,TRIB3	335 (18)
CDC42		enzyme	Activated	2.219	5.41e-05	ATF3,BCL2L11,CCND1,ESR1,FOS,JUN,STAT3,TGM2	379 (21)
honokiol		chemical - endogenous non-mammalian			5.41e-05	CCND1,CCND2,CDK2,CDKN1A,FOS,JUNB,MMP9,PTPN6	349 (19)
IFNLR1		transmembrane receptor			5.45e-05	ATF3,CCL4,CLEC4D,CLEC4E,CMPK2,IFI44,IFIT3,LIF,MYC	198 (11)
PAX1		transcription regulator		-1.667	5.45e-05	ACOD1,CRABP2,DLX3,GBX2,PAX2,PDGFRA,SPRR1A,THY1,ZIC2
N-acetylsphingosine		chemical reagent		0.885	5.45e-05	CDKN1A,CEBPB,COL1A2,COL3A1,FOS,GSTM5,JUN,SERPINE1,SPHK1	324 (19)
PTC-209		chemical reagent		-0.812	5.45e-05	CDKN1A,COL1A2,COL3A1,FBLN1,FBLN2,KCNJ5,PDGFRA,RND1,TNNT2
ELAVL1		other		1.177	5.5e-05	ATF3,CACHD1,CD68,CD83,CDK2,CDKN1A,CLDN1,CYP51A1,DUSP1,FLNA,FOS,GBP6,HLA-A,HMOX1,IFI44,Ighv2-5,MYC,PCOLCE,PRLR,SLC7A11,SQSTM1,STAT3,TSC22D3	306 (19)
HDAC2		transcription regulator		-0.214	5.51e-05	BBC3,BCL6,CCND1,CDK2,CDKN1A,CDT1,COL1A2,EGR1,ESR1,MMP9,MYC,OLFM4,PAX2,S100A9,SCN2A,SFRP1,SOX11,SQSTM1	356 (24)
CTSS		peptidase		-0.555	5.53e-05	BCL2L11,COL4A1,COL4A2,ITGA5,ITGA7,MMP9,PRKCD	204 (7)
XIAP		enzyme		1.248	5.53e-05	ACOD1,CCND1,CDKN1A,MYC,RELA,SERPINE1,SQSTM1	326 (23)
arachidonic acid		chemical - endogenous mammalian	Activated	2.791	5.59e-05	CD83,COL1A2,DDIT3,EGR1,ELOVL6,FOS,FOSL1,HMOX1,JUN,KLF6,RGS2,SCD,SPP1,TNFRSF1B	374 (21)
Ctbp		group		1.455	5.64e-05	DSG2,GADD45A,HEY1,JUP,PLAUR,STAP2	172 (7)
FSHR		G-protein coupled receptor		1.387	5.67e-05	AR,CEBPB,CYP11A1,DUSP1,IGFBP3,INHBB,KITLG,PGR,PLA1A,PLAT	385 (25)
NOP58		enzyme			5.68e-05	CCND1,LTF,PGR
PSMD14		peptidase			5.68e-05	BCL2L11,BCL3,CCND1	309 (14)
EXOC3L1		other			5.68e-05	CDKN1A,PDE7B,SEPTIN9
foretinib		chemical drug			5.68e-05	BBC3,BCL2L11,Hrk
ELL		transcription regulator			5.68e-05	CDKN1A,FOS,MYC	387 (23)
U2AF2		other			5.68e-05	BBC3,CCND1,CDKN1A	302 (16)
STRAP		other			5.68e-05	JUN,MYC,SERPINE1	349 (24)
GFRA2		transmembrane receptor			5.68e-05	EGR1,EGR2,FOSB	151 (7)
ELAVL3		other			5.68e-05	GAP43,Nefm,TUBB3
mir-297		microRNA			5.68e-05	AR,CCND2,JUNB
(E)-1-(2-nitrovinyl)naphthalene		chemical reagent			5.68e-05	CCND1,MYC,SQSTM1	173 (7)
(E)-9-(2-nitrovinyl)anthracene		chemical reagent			5.68e-05	CCND1,MYC,SQSTM1	173 (7)
2-amino-3-phosphonopropionic acid		chemical - endogenous mammalian			5.68e-05	EGR1,FOS,JUNB	236 (7)
PRKCB		kinase		1.517	6.12e-05	CCND1,CD83,CDKN1A,COL1A2,EGR1,FOS,JUN,MMP9,MYC,PRKCD,SERPINE1	314 (18)
let-7		microRNA	Inhibited	-2.883	6.25e-05	ACVR1C,AR,CCND1,CDT1,COL1A2,COL24A1,COL3A1,COL4A1,FOSL1,GREB1,HMGA1,HMOX1,MYC,MYD88,NR1H4,NXT2,PLAUR,RDH10,RELA,SCD,SERPINE1,SLC1A4,STAT3	325 (21)
GPD1		enzyme			6.3e-05	ACOT2,ANXA2,BCL6,CCND1,CD63,CYP39A1,CYP7B1,ELOVL6,FADS3,GADD45A,GPAT3,NIBAN1,PSAT1
IL27	1.693	cytokine	Activated	2.518	6.3e-05	AHR,CCL4,CCND2,CD274,CD63,EGR1,EGR2,EOMES,FOS,GADD45G,HLA-A,IL1RN,MYC,PIM1,SOCS1,SOCS3,TNFRSF4	371 (17)
morphine		chemical drug		0.175	6.3e-05	CALB1,CCND1,CDKN1A,FOS,FOSB,FOSL1,FOSL2,GRIN2A,JUNB,MMP9,NTRK3,OPRL1,PLAT,PPP1R14C,RELA,SYNPO,TRPC1	499 (24)
SMAD1		transcription regulator		1.463	6.51e-05	CDKN1A,COCH,COL1A2,COL4A1,GADD45B,HEY1,MYC,SPP1,TBX20	385 (21)
AGTR1		G-protein coupled receptor		1.969	6.51e-05	CCND1,COL3A1,CRH,DUSP1,FOS,GSTM5,HMOX1,JUN,SERPINE1	311 (18)
MED13		transcription regulator		0.164	6.51e-05	ELOVL6,HMGCR,KITLG,LIF,MYC,PRKAR2B,SCD,Sik1,SUSD2
trichloroethylene		chemical toxicant		-1.897	6.62e-05	ACVR1C,ATF5,CD63,COL3A1,DHCR24,EGR1,IGFBP3,LTBR,PLS3,PRLR
verapamil		chemical drug		-0.99	6.62e-05	ANXA2,FOS,GJA1,HLA-A,HMGCR,INSIG1,JUN,KCNC2,S100A10,SRXN1	399 (22)
FOSB	0.804	transcription regulator		0.301	6.68e-05	CCND1,CEBPB,CRH,FOS,FOSB,FOSL1,MMP9,SERPINE1	353 (20)
ozone		chemical toxicant	Activated	2.77	6.68e-05	Chil3/Chil4,FOS,HMOX1,JUN,JUNB,RELA,SOCS3,SPP1	280 (17)
rolipram		chemical drug		1.063	6.68e-05	BCL2L11,DUSP1,FOS,IL27,MMP9,PDE4B,PGR,SYNPO	294 (23)
FBXW7		enzyme		0.059	6.83e-05	ADAM22,BCL2L11,FDFT1,HEY1,HMGCR,HSPB1,JUN,MT-ATP6,MTHFD2,MYC,RELA,SERPINE1	384 (19)
PTHLH		other		1.27	6.83e-05	ADAMTS1,AR,CCND1,CDK2,CDKN1A,FOS,FOSL2,HAPLN1,MMP9,RGS2,RUNX1,SERPINE1	374 (23)
entinostat		chemical drug	Activated	2.134	6.83e-05	BBC3,BCL2L11,CCND1,CD83,CDKN1A,DUSP1,GSN,IGFBP3,MMP9,MYC,OLFM4,SERPINE1	384 (22)
IRF8		transcription regulator		0.337	6.84e-05	ACVRL1,AKAP12,ATF3,BCL6,CD83,CDKN1A,EGR1,EGR2,FOS,GABRA3,IFIT3,IL1RN,IL27,KCNJ5,KLF6,LIF,LTF,MMP9,MYC,PCDH7	368 (18)
MED13L		other		1.091	6.95e-05	KITLG,LIF,MYC,SUSD2
mercury		chemical toxicant		0.085	6.95e-05	ESR1,Mt1,PGR,PLAT
budesonide		chemical drug		-0.939	6.98e-05	BCL2L11,CAPN5,CAST,CD68,CDA,CDKN1A,CNTN4,CYP2S1,DSG1,EMP1,GNAI1,GNG4,HDC,IGFBP3,IL1RAP,IL1RN,JUN,MSMO1,NIBAN2,PIM1,PRKCQ,RHOC,S100A9,ST3GAL4,TNFAIP6,TOM1,TSC22D3	274 (14)
DOCK8		other		0.302	7.01e-05	ARID5A,CCL4,CCND2,CMPK2,HDC,IFIT3,Mx2,PLA1A,PLAT,SLFN12L,SOCS1
JQ1		chemical reagent		-0.02	7.01e-05	BCL2L11,CCND1,CD274,CFTR,DDIT3,DHCR24,FDFT1,FOS,GADD45G,LAMB3,MYC,RELA,SLC7A11,SOCS3,SPP1,Sprr2g,SQSTM1,STAT3	375 (22)
ASCL1		transcription regulator		-0.825	7.04e-05	CDK2,CDKN1A,DLL3,GADD45G,Nefm,PAX2,PDGFRA,POU4F2,PRKCQ,PRMT2,SNAP25,TEAD2,ZMAT4
MAX		transcription regulator	Inhibited	-2.8	7.04e-05	AR,BCL6,CCND2,CDKN1A,DDIT3,EBF1,GADD45A,GADD45B,HMGA1,KLF10,KLF6,MYC,TNNT2	268 (9)
ADA		enzyme		-0.768	7.12e-05	ADORA1,COL1A2,MMP9,PDE5A,PLAT,SERPINE1,SPP1	296 (17)
amino acids		chemical - endogenous mammalian	Inhibited	-2.027	7.12e-05	DDIT3,FOS,FOSB,JUN,JUNB,MYC,SLC7A1	362 (23)
IKZF1		transcription regulator		-1.027	7.2e-05	BCL6,CCL4,CCND2,CD68,CD8A,CDKN1A,CYP7B1,DIPK1A,EBF1,EMP1,IFIT3,IGSF11,IL27,JUP,KITLG,LILRB3,MYC,MYO1B,NOTCH3,NR1H4,PRKCQ,RAPGEF4,RASSF4,RUNX1,TNNT2	391 (16)
CXCL12		cytokine		1.607	7.54e-05	BCL3,CCND1,CDK2,COL3A1,EGR1,FLNA,FOS,HEY1,IGFBP7,JUN,JUNB,MAFK,MMP9,MYC,PGR,PRKCD,RHOC,SHH,SOCS1,SOCS3,TNFRSF1B	360 (19)
caffeic acid phenethyl ester		chemical drug		-0.695	7.62e-05	CCND1,CD83,CDK2,CDKN1A,DDIT3,EGR1,ELOVL1,ESR1,HMOX1,HSPB1,IL27,KLF6,PTGFR,STAT3	418 (19)
RTN4		other		-0.074	7.7e-05	CPLX1,FGF1,GAP43,INA,JUN,NEFL,RELA,SPRR1A,TSPAN2,TUBB4A	221 (7)
LRP1		transmembrane receptor	Inhibited	-2.32	7.7e-05	CCL4,CD68,COL3A1,DDIT3,GLI2,MMP9,MRC2,SERPINF1,SHH,SQSTM1	397 (26)
ruxolitinib		chemical drug		-1.429	7.71e-05	ADM2,CCND1,CD274,CD79A,ESR1,LOXL1,MT-ATP6,MYC,PSAT1,RAB20,SQSTM1,STAT3	281 (17)
HDAC6		transcription regulator		1.937	7.74e-05	ADAMTS1,AR,ESR1,HTR1A,JUN,JUNB,MYC,MYD88,SERPINE1	417 (24)
n-nitrosomethylbenzylamine		chemical toxicant			7.75e-05	ANXA2,CCND1,CLDN1,CTTN,HMOX1,INHBB,KIFAP3,KLF10,LAMB3,MGST3,MYO10,PHGDH,PLS3,SCEL,SDC1,TUBB6
PKNOX2		transcription regulator		0.816	7.79e-05	BBC3,CDKN1A,EGR1,ESR1,GADD45A,RPRM
CYB5R4		enzyme		-1.041	7.79e-05	ATF3,DDIT3,HMOX1,LPL,Mt1,SCD	192 (7)
KCNJ10		ion channel		1.633	7.79e-05	ANXA3,FOSL1,GADD45A,GBP6,LGALS3,TNFRSF12A
ACTN4		transcription regulator		0.984	7.79e-05	CCND1,FOS,MMP9,MYC,PGR,SERPINE1	301 (21)
CLDN7		other		0.862	7.83e-05	ANXA3,CD68,F5,FADS3,FOSL1,IFI44,IGFBP7,LGALS3,MMP9,NETO2,PANX2,PHGDH,SCEL,TEAD2,TINAGL1
EHF		transcription regulator		1.941	7.86e-05	BMP4,CCBE1,CRABP2,HMOX1,IL1RN,NOTCH3,PLAT,PLAUR,S100A9,SCEL,SERPINE1,THY1,ZFP36L1
SLC25A13		transporter			7.86e-05	ACOT2,ANXA2,BCL6,CCND1,CD63,CYP39A1,CYP7B1,ELOVL6,FADS3,GADD45A,GPAT3,NIBAN1,PSAT1
SASH1		other		0.302	8.01e-05	ARID5A,CCL4,CCND2,CMPK2,HDC,IFIT3,Mx2,PLA1A,PLAT,SLFN12L,SOCS1
GFI1		transcription regulator	Inhibited	-2.508	8.1e-05	BBC3,BCL3,CCND2,CDKN1A,EGR2,FOSL2,GADD45G,GJA1,JAK3,JUN,LTBR,MAFF,MYC,RAPGEF4,RASGRP1,RELA,RIPK1	341 (14)
PAK2		kinase		-0.707	8.17e-05	BMP4,DUSP1,GADD45A,HMGA1,IGFBP3,NOX4,PGR,PLAUR	364 (16)
aprepitant		chemical drug		-1.414	8.17e-05	CCL28,EGR1,IGFBP3,LAMB3,OLFM4,S100A9,TSPAN2,UNC13D
ezetimibe		chemical drug		-1.6	8.17e-05	CD68,CH25H,CYP51A1,FDFT1,HMGCR,HMGCS1,IDI1,SCD	124 (6)
NR4A1		ligand-dependent nuclear receptor		-0.746	8.19e-05	ATF3,BCL2L11,CCND1,CCND2,COL1A2,CRABP2,DDIT3,GBE1,GSTM5,HDC,HMGCR,HMOX1,INSL3,JUP,KITLG,LPL,MARCKSL1,MMP9,Mt1,NR1H4,PCK2,PDK4,RASSF4,SCD,SERPINE1,TAGLN2	400 (23)
ARNT		transcription regulator		1.158	8.21e-05	AHR,CCND2,CD274,CEBPB,CLDN1,CYP2S1,F5,GADD45B,MYC,PCDH18,PCK2,PGM2,SERPINE1,SHH,SOCS3,SPP1,TSC22D3,TUBA4A	437 (25)
CHRM1		G-protein coupled receptor	Activated	2.207	8.3e-05	EGR1,EGR2,EGR3,FOS,JUN	369 (23)
TLE1		transcription regulator			8.3e-05	ATF3,DUSP1,EGR1,FOS,NUPR1	212 (7)
RPL22		translation regulator	Inhibited	-2.219	8.3e-05	ATF3,BBC3,BCL2L11,CDKN1A,DDIT3	139 (7)
PPP5C		phosphatase	Inhibited	-2.2	8.3e-05	AHR,CCND1,CDKN1A,DUSP1,MYC	358 (20)
S-equol		chemical drug		1.951	8.3e-05	HMOX1,MMP9,PGR,PLAT,SERPINE1	413 (23)
Sb202190		chemical drug		-1.333	8.46e-05	CCND1,CCND2,CDKN1A,CEBPB,CFTR,EGR1,FOS,HAPLN1,HMOX1,IL27,JUNB,MMP9,PGR,RUNX1,SERPINE1,SPP1	262 (18)
IL10		cytokine		0.62	8.47e-05	BCL2L11,BCL3,CCL4,CCND2,CD274,CD63,CD68,CD83,CDKN1A,Chil3/Chil4,CTSH,DUSP1,FLRT2,FOS,HDAC9,HMOX1,IL1RN,IL27,JUN,KITLG,LIF,MMP9,MYD88,PDE4B,PHGDH,RAB20,S100A9,SLC11A1,SLC7A5,SOCS1,SOCS3,SPP1,STAT3,TINAGL1,TNFRSF1B,TSC22D3	392 (20)
PD173074		chemical reagent		0.057	8.68e-05	ADGRG1,CCND1,CCND2,CEBPB,CYP11A1,DLX3,HEY1,MAFK,MYC,NUPR1,SLC13A4,TGM2	366 (22)
EBF1	-0.485	transcription regulator		1.311	8.79e-05	BCL6,CD79A,CEBPB,EBF1,EIF4EBP1,ESR1,MAPK10,MYC,MYD88,NFIL3,PCK2,PIK3CD,PRKAR2B,RHOQ,SCD,SOCS1,SOCS3	354 (22)
SATB1		transcription regulator		1.19	8.87e-05	CCND1,CD8A,CDKN1A,CORO6,F5,FOSB,GADD45B,GNG4,KITLG,NIBAN1,PGR,POU4F1,RASGRP2,RIPK1,RUNX1,SLC27A2,TSC22D3,TUBA4A
let-7a-5p (and other miRNAs w/seed GAGGUAG)		mature microRNA	Inhibited	-3.233	9.08e-05	ADGRG1,CCND1,CCND2,COL1A2,COL24A1,COL3A1,COL4A1,COL4A2,COL4A5,DSP,HMGA1,HMOX1,MMP9,MYC,NID2,RDH10,SCD,SLC1A4,STAT3,UGT8	347 (14)
SH3TC2		other		-1.89	9.08e-05	CYP51A1,DHCR24,EGR1,EGR2,HMGCR,HMGCS1,IDI1
PRKDC		kinase		1.067	9.08e-05	AHR,CCND1,CDKN1A,EGR1,EGR2,GREB1,PLA1A	377 (21)
HEIH		other	Activated	2.571	9.08e-05	DUSP1,FLNA,FLNC,FOS,GADD45B,JUN,KITLG	162 (7)
Salmonella enterica serotype abortus equi lipopolysaccharide		chemical toxicant		0.385	9.57e-05	ATP1B1,CCL4,CD274,EGR1,EGR3,FOSL1,GADD45A,GADD45B,HECW2,HEY1,MAFF,OSGIN1,PLA1A,SGPP2,SOCS3,STARD4,TEX14,ZBTB10	358 (13)
NGFR		transmembrane receptor		-0.52	9.94e-05	A2M,CCND1,CDK2,FOS,JUN,PLAT,SERPINE1,SNAP25	355 (20)
ATF3	2.197	transcription regulator	Activated	2.676	0.0001	ATF3,BBC3,CCND1,CD83,CDK2,CDKN1A,CHAC1,DDIT3,GBP6,GSN,HSPB1,JUN,SERPINE1,SLC11A1,SPRR1A,STAT3	356 (19)
rosiglitazone		chemical drug		0.266	0.000103	ADAMTS1,C1QC,C4A/C4B,CCND1,CD68,CDKN1A,COL1A2,COL3A1,ELOVL6,EOMES,FGF1,FOS,FOSL1,GPAT3,HMOX1,IFIT3,IL1RN,INSIG1,ITGA3,LAMB3,LPL,MMP9,Muc1,NOX4,PDGFRA,PDK4,PRLR,RGS2,S100A9,SCD,SEMA3C,Serpina3g (includes others),SERPINE1,SERPINF1,SLC27A2,SOCS1,SOCS3	317 (22)
IFNA2		cytokine		0.337	0.000103	ATF5,BAG3,CD274,CDKN1A,CMPK2,DDX60,HLA-A,HMGCS1,IFI44,IFIT3,IFITM2,MMP9,MT-ATP6,Mx2,MYC,PLAT,PPP2R2C,SDC1,SH2D1A,SOCS1,SOCS3,TGM2,ZC3HAV1	290 (16)
GW3965		chemical reagent		-0.101	0.000103	CCL4,CH25H,CLEC4E,CYP11A1,DUSP1,GADD45G,GNAI1,IL1RN,LPL,MLXIPL,MMP9,PDK4,PRKAR2B,SCD,SOCS3	220 (15)
NDRG1		kinase		-1.103	0.000104	AR,ATF3,BCL2L11,CCND1,EGR2,FOS,JUN,MYC,RELA,SHH,STAT3	401 (21)
CD-38 inhibitor 78c		chemical reagent		-1.633	0.000106	FBLN5,FGF1,FGF9,HLA-A,LIF,STAT3	222 (7)
PPP4R3A		other			0.000106	CALB2,EOMES,IRX1,MYT1L,OTX1,TUBB3
DSP	1.995	other		1	0.000106	COL1A2,COL3A1,GJA1,JUP,LPL,MMP9	310 (12)
PCDH11Y		other	Activated	2.433	0.000106	BMP4,CCND1,FOSL1,GJA1,JUN,MYC	269 (7)
ST8SIA1		enzyme		-0.577	0.000106	C1QC,C4A/C4B,CDK2,CDKN1A,HMGCR,MMP9	452 (24)
tranylcypromine		chemical drug		-1.029	0.000106	CD274,CDKN1A,CRH,FOS,MMP9,PDE4B	207 (7)
acetaldehyde		chemical - endogenous mammalian	Activated	2.449	0.000106	CEBPB,COL1A2,DDR2,FOS,JUN,MYC	312 (17)
TCF3		transcription regulator		-0.856	0.000108	ALCAM,ATF3,BCL2L11,BCL6,CCL28,CCND2,CD79A,CDKN1A,CYP11A1,EBF1,EIF4EBP1,ESR1,GADD45A,GADD45B,GLUL,JUN,KLF6,MSMO1,MYC,NELL1,NFIL3,NFKBIE,NOTCH3,NUPR1,RASGRP2,RASSF4,Serpina3g (includes others),SLC7A5,SOCS1,SOCS3,SPC25,THY1,TUBB3	258 (17)
MTA1		transcription regulator		1.703	0.000108	CCND1,CCND2,EMP1,ESR1,GPRIN3,MMP9,MYC,PGR,STAT3	340 (25)
JAK3	0.929	kinase		0	0.000108	BCL6,CD274,CDK2,ENPP2,GADD45G,SHH,SOCS3,STAT3,TUBB3	362 (21)
mir-29		microRNA		-1.315	0.000108	AR,CCND1,CLDN1,COL1A2,COL3A1,COL4A2,COL4A5,DNMT3B,EOMES,HMGA1,LPL,PDGFRA,ZFP36L1	394 (20)
HDAC3		transcription regulator		-0.091	0.000108	CCND1,CDKN1A,COL1A2,ELOVL6,ENPP2,FOS,HMOX1,JUP,MMP9,MYC,SCD,SERPINE1,SPP1	320 (22)
Cdc42		enzyme		-1.58	0.00011	CTSH,DDAH1,EDN2,EIF4EBP1,FADS3,FLNA,LIF,MYH9,OLFM4,PHGDH,SDC1,TNFRSF12A	196 (7)
ionomycin		chemical reagent	Activated	2.025	0.000112	CCND2,DDIT3,DUSP1,EGR1,EIF4EBP1,FOS,FOSB,Hrk,HTR1A,MMP9,MYC,NFIL3,PIM1,RELA,RGS2,Sik1,SLC3A2,SPP1,STAT3,TRHR	427 (22)
TLR3		transmembrane receptor	Activated	2.757	0.000112	ACOD1,ATF3,CAST,CCL4,CD274,CMPK2,DUSP1,FOS,GADD45B,HMOX1,IFI44,IFIT3,IL1RN,IL27,JUNB,LIX1,MYD88,PIK3CD,RIPK1,SERPINE1,SOCS1,SOCS3,TNFRSF1B,ZC3HAV1	359 (18)
SUPT16H		transcription regulator		-0.777	0.000113	CCND1,CDK2,CDKN1A,CLSTN2,CPNE4,EGR1,IGFBP7,NEFL,NXT2,PLEKHO1,SLC1A4,TMTC1,TRIM55,VGF,VWA5B2
tributyltin		chemical reagent		0.333	0.000113	AHR,COL1A2,COL3A1,ELOVL6,IFIT3,ITGA3,LPL,NDST4,PALM3,PDGFRA,PDK4,RCAN2,SH2D3C,SOD3,SYNPO	193 (7)
RB1		transcription regulator	Inhibited	-2.056	0.000113	ATF3,ATP1B1,BCL2L11,CCND1,CD274,CD83,CDK2,CDKN1A,CDT1,CLIC4,COL4A1,COL4A2,DDIT3,DUSP1,EGR1,EGR3,EOMES,EZR,FOS,FOSB,FOSL1,GADD45A,GADD45B,GLI2,GNAI1,GPR176,JUN,JUNB,KLF10,MYC,Nefm,PIM1,RAB27A,SERPINE1,SH3BP2,SLC5A8,TNFRSF1B,TNNT2	449 (22)
PI3K (family)		group		0.712	0.000113	BCL2L11,CD274,CLDN2,DDIT3,ESR1,FOS,HK1,HMOX1,MMP9,MYC,RDH10,SERPINE1,SHH,TGM2	358 (20)
EIF2B5		translation regulator			0.000115	COL1A2,DDIT3,DUSP1,MYC,Rpl34 (includes others),SCD,SYT2	360 (12)
RACK1		enzyme		1.709	0.000115	CDKN1A,COL1A2,DDX60,FOS,IFI44,IFIT3,MYC	256 (21)
ramipril		chemical drug		-1.89	0.000115	COL1A2,COL3A1,COL4A1,COL4A2,COL4A5,CRH,MMP9	343 (13)
JAK1		kinase	Activated	2.094	0.000118	BCL2L11,BCL3,CDKN1A,ENPP2,FOS,HLA-A,JUNB,LIF,RUNX1,SOCS3,STAT3	274 (18)
RC3H1		enzyme		-0.707	0.000118	CCL4,CLDN1,FOSL1,HSPB1,IFI44,IFIT3,SDC1,SHMT2,SPP1,TNFRSF1B,TNFRSF4	341 (12)
tyrphostin AG 1478		chemical drug	Inhibited	-2.101	0.000118	CCND1,CDKN1A,FBN1,FOS,HAPLN1,MMP9,RELA,RUNX1,S100A10,SPHK1,TNFAIP6	401 (19)
ATP7B		transporter	Inhibited	-2.828	0.00012	CYP51A1,ELOVL6,FDFT1,HMGCR,HMGCS1,IDI1,MSMO1,Mt1
FCGR2B		transmembrane receptor		1.463	0.00012	ACOD1,CCND2,CLEC4E,GPR84,MARCKSL1,RASGRP1,SOCS1,SOCS3	360 (17)
Nr1h		group		-1.287	0.000121	ATP1B1,BCL3,CCND2,CLEC4E,ELOVL6,FGF1,LAT2,LPL,MARCKSL1,MLXIPL,Mx2,PRKCQ,SBNO2,SCD,SFRP1,SLFN12L,THY1	334 (19)
methamphetamine		chemical drug		1.683	0.000121	BMP7,CAST,DERL3,EGR1,FOS,FOSB,FOSL1,FOSL2,HMOX1,JUN,MAP3K6,MATN2,MMP9,MYC,NAT8L,TNFRSF1B,UGT8	360 (21)
methylselenic acid		chemical reagent		0.278	0.000123	ADAMTS1,AR,ATF3,ATF5,BMP4,CCND1,CDK2,CDKN1A,DDIT3,DHCR24,ESR1,GADD45A,JUN,JUNB,MATN2,MYC,NAT2,NFIL3,RAPGEF4,RHOQ,SCD,TUBA4A,ZNF217	475 (25)
CDKN1B		kinase	Inhibited	-2.39	0.000124	ARL10,CCND1,CDK2,CDKN1A,DHH,EGR1,GAP43,HSPB8,LGALS3,MMP9,MYC,RUNX1,S100A9,SERPINE1,STAT3	373 (21)
black raspberry extract		chemical drug			0.000124	ANXA2,CLDN1,CTTN,HMOX1,INHBB,KIFAP3,KLF10,LAMB3,MYO10,PHGDH,PLS3,SCEL,SDC1,TUBB6
dihydroartemisinin		chemical drug		-0.656	0.000125	CCND1,CDK2,CDKN1A,MMP9,MYC	347 (21)
withaferin A		chemical reagent		0.369	0.000125	BCL2L11,CDKN1A,RUNX1,SERPINE1,SPP1	344 (20)
ethyl 2-{[(6,7-dimethyl-3-oxo-1,2,3,4-tetrahydro-2-quinoxalinyl)acetyl]amino}-4,5-dimethyl-3-thiophenecarboxylate		chemical reagent		0.447	0.000125	BBC3,CDKN1A,PLAT,POU3F2,TUBB3
anti-benzo(a)pyrene-diol-epoxide		chemical toxicant	Activated	2.174	0.000125	BCL2L11,CCND1,CDKN1A,GADD45B,JUN	337 (20)
growth factor		group	Activated	2.236	0.000125	DUSP1,FOS,GLUL,MYC,SPHK1	375 (17)
TIMP3		other		-1.066	0.000127	BMP4,CEBPB,EGR2,FOS,JUN,LTBP1,MMP9,SERPINE1,STAT3	301 (21)
CCND1	0.482	transcription regulator	Activated	2.868	0.000129	AR,ARHGEF2,CCND1,CCND2,CDK2,CDKN1A,DHCR24,EIF5A2,ENDOD1,ENPP2,FLNA,HSPB1,HSPB8,MAFF,MFSD6,MYC,NIBAN2,PDLIM4,PGR,RGS2,ROR2,SOX11,SPC25,SPP1,STARD4,STBD1,TRAPPC2,TUBA1C	409 (25)
ETS2		transcription regulator		1.764	0.000133	BMP4,CD79A,CDKN1A,FGF1,FOS,HMOX1,JUN,JUNB,MMP9,MYC,SPP1	362 (27)
saikosaponin A		chemical reagent			0.000135	BMP4,FOS,JUN,JUNB	357 (19)
N-Cadherin		group		0	0.000135	CCND1,CDKN1A,MMP9,SOX11	348 (18)
BANP		other			0.000135	BBC3,CCND1,CDKN1A,STAT3	366 (24)
SNW1		transcription regulator			0.000135	CCND1,CDKN1A,MMP9,SERPINE1	304 (12)
JNJ-39933673		chemical reagent		-1	0.000135	MLXIPL,RELA,SCD,SPP1	141 (6)
NKX2-3		transcription regulator		0.673	0.000136	BMP4,CD68,CDKN1A,CMPK2,CSRNP1,DDX60,FAR2,FBN2,FLRT2,HEY1,MYD88,NETO2,PHGDH,PLA1A,PLCB1,PRSS12,PSAT1,SEMA3A,SHMT2,TTC3,ZC3HAV1
GRN		growth factor		-1.635	0.000137	C1QC,CCL4,CCND1,CD300A,CD68,CH25H,DDIT3,GPNMB,LGALS3,LPL,SORL1,SPP1,SQSTM1,UGT8	398 (21)
SALL4		transcription regulator		0.943	0.000139	AKAP12,ANXA2,ATP1B1,AVIL,CCL4,CCND1,CCND2,CDK2,FGF1,FLNC,GLI2,JUN,PRKAR2B,SEMA3C,SEMA3D,SEMA6A,SERPINE1,SFRP1	172 (7)
WWTR1		transcription regulator		0.529	0.00014	AIFM3,BMP4,CCND1,CDKN1A,CYP11A1,EMP1,ESR1,FMOD,GJA1,HMGCR,LAMA5,SERPINE1,SHH,SPP1,SYNPO,THY1	354 (19)
glycine		chemical - endogenous mammalian		-0.271	0.00014	CCND1,CDKN1A,FOS,PCK2,PHGDH,PSAT1	382 (21)
MFSD2A		transporter	Activated	2.433	0.00014	CYP51A1,FDFT1,IDI1,INSIG1,SCD,STARD4
RPS6KA5		kinase	Activated	2.418	0.00014	DUSP1,FOS,FOSL1,JUN,JUNB,MYC	348 (19)
BAPTA		chemical reagent		-1.387	0.00014	FOS,FOSB,FOSL1,JUN,JUNB,MMP9	403 (22)
V-PYRRO/NO		chemical reagent	Inhibited	-2.449	0.00014	DDIT3,EGR1,HMOX1,JUN,RELA,TNFRSF1B	189 (7)
SLC22A5		transporter	Activated	2.646	0.000143	ACVRL1,BMP4,CDKN1A,COL3A1,IGFBP3,JUNB,LTBP1
FECH		enzyme			0.000143	CCND1,COL3A1,COL4A1,COL6A3,CYP51A1,CYP7B1,HMOX1
VTN		other		0.467	0.000143	CDKN1A,COL1A2,ITGA5,MMP9,PLAUR,S100A10,SERPINE1	346 (22)
pilocarpine		chemical drug		0.796	0.000143	FOS,FOSB,JUNB,KCNQ2,LGALS3,PDK4,SFRP1	379 (20)
IRF2BP1		transcription regulator			0.000144	ADAMTS1,ATF3,DUSP1,EGR2,EMP1,FAM83G,FASTKD2,FOS
mir-25		microRNA	Inhibited	-2.766	0.000144	BBC3,BCL2L11,CDKN1A,EDNRB,GADD45A,ITGA5,KITLG,NOX4	376 (20)
propylthiouracil		chemical drug		0.5	0.000145	EMB,EMP1,EMP3,GAP43,GLUL,GSN,Ifitm1,INA,JUN,MGST3,Nefm,NRN1,PCSK2,POU4F1,Serpinb1b,SLC29A4,SNCG,SYNPO,TRHDE,TRIB3,TUBB2B
EIF2AK2		kinase	Activated	2.408	0.000147	ATF3,CCND1,CDKN1A,CEBPB,DDIT3,EGR1,FOS,IFITM2,JUN,MMP9,MYC,SOCS3,ZC3HAV1	339 (20)
HIPK2		kinase	Activated	2.334	0.00015	AVIL,CCND2,CDKN1A,EGR1,GNB3,GSTM5,HMOX1,LGALS3,POU4F1,SH2D6,SLC25A37	356 (17)
diphenyleneiodonium		chemical reagent	Inhibited	-2.124	0.00015	ATF3,DDIT3,EGR1,FOS,HMOX1,MMP9,NOX4,PAX2,PDE5A,RELA,SERPINE1	348 (18)
levothyroxine		chemical - endogenous mammalian		-0.05	0.00015	BBC3,CDK14,CDKN1A,ESR1,FOS,IGFBP3,MLXIPL,Nes,SEMA3C,SLC7A3,TRHDE	372 (26)
AGER		transmembrane receptor		1.724	0.00017	CCL4,CCND1,CDKN1A,COL4A1,EGR1,LPL,MMP9,NEFL,S100A9,SERPINE1,TUBB3	373 (21)
NOTCH3	0.468	transcription regulator		1.243	0.00017	ARHGEF4,CDKN1A,COL18A1,COL3A1,COL5A3,HEY1,ITGA3,ITGA7,MMP9,PRAG1,PRKCQ	285 (15)
FST		other		-0.672	0.00017	ATP1A2,BMP7,GPAT3,INHBB,LIF,LTF,MSTN,Muc1,PAX2,POU4F3,PRLR	216 (7)
KDM3A		transcription regulator		0.689	0.000172	ALCAM,AR,CCND1,FLNC,HMOX1,MMP9,MYC,SERPINE1	257 (15)
NF2		other		-0.524	0.000172	CCND1,CD274,CDKN1A,GLUL,HMOX1,MMP9,MYC,PLAUR	394 (19)
CGS 21680		chemical reagent		-0.412	0.000172	CCL4,COL3A1,EGR1,EGR3,FOS,GRIN2A,RGS2,RGS4	397 (25)
PAX5-ELN		fusion gene/product		-0.707	0.000172	CRHBP,GALNT14,HTR1B,NKD2,PCDH9,PRLR,RAPGEF3,SH3BGRL2
EIF4EBP1	0.845	translation regulator		-0.819	0.000172	BBC3,CCND1,CEBPB,DDIT3,EGR1,IL1RN,MYC,NFIL3,SOCS1	394 (21)
KITLG	0.393	growth factor	Activated	2.948	0.000174	BCL2L11,CCL4,CD68,CDKN1A,CLIC1,DHCR24,EDNRB,EGR1,FOS,GJA1,HMOX1,IGFBP3,IL1RN,LTF,PIM1,PRKCQ,PTPRR,RCC2,SOCS1,ST3GAL4,STAT3,Tpm4,TSC22D3	312 (17)
collagenase		group	Activated	2.646	0.000177	CCL4,CEBPB,EGR1,FOSL1,JUN,JUNB,STAT3	336 (10)
miR-26a-5p (and other miRNAs w/seed UCAAGUA)		mature microRNA		0.649	0.000177	CCND2,CDKN1A,FGF9,HTR1A,MYC,PGR,PLCB1
GHR		transmembrane receptor		-1.172	0.000178	CCND1,CDKN1A,IGFBP3,LPL,MYC,PRLR,RELA,Serpina3g (includes others),SOCS3,SPP1	367 (22)
birabresib		chemical drug		1.993	0.000178	ADAMTS1,CDH10,DDIT3,HS6ST2,IFI44,KANK4,MYC,PCDH9,SERPINF1,TEX14
KDM5B		transcription regulator		1.52	0.000179	CCND1,CLCF1,CLDN1,DDIT3,DHCR24,EGR1,EHD1,ESR1,GADD45A,GAL,GREB1,INSIG1,NEFL,PGR,PLS3,PRLR	269 (13)
SMAD2		transcription regulator		1.376	0.00018	ACVR1C,BCL2L11,CDKN1A,COL1A2,COL3A1,CYP51A1,FDFT1,GADD45B,HMOX1,IRX1,MMP9,SERPINE1,SPHK1,SYT2	344 (21)
mir-1		microRNA		-0.739	0.00018	ANXA2,CCND1,CCND2,CDK14,CEBPB,ESR1,GJA1,MMP9,NOTCH3,NXT2,SFRP1,TAGLN2,TNNT2,ZFP36L1
PADI4		enzyme		-1.941	0.000182	BBC3,CDKN1A,GADD45A,OSGIN1,TNFRSF12A	260 (12)
FOXG1		transcription regulator		-1.121	0.000182	BCL2L11,CCND2,CDKN1A,PAX2,SERPINE1	198 (7)
IGFBP7	0.598	transporter		0.577	0.000182	CCND1,CDKN1A,CYP11A1,MMP9,MYC	324 (21)
Betacatenin/TCF		complex		1.387	0.000182	CCND1,FGF9,GJA1,JUN,MYC
SP2		transcription regulator			0.000182	CCND1,CDKN1A,FOS,PRKCD,SERPINE1
cyproterone acetate		chemical drug		0.277	0.000182	AR,CCND1,GAP43,MYC,PRLR	396 (19)
ETS		group			0.000184	CCND1,CRH,EGR1,FOS,JAK3,SERPINE1
MED12		transcription regulator		1.274	0.000184	BMP4,EGR2,KITLG,LIF,MYC,SUSD2	11 (2)
CDH2		other		-0.398	0.000184	AR,CCND1,CDKN1A,JUN,MMP9,THY1	370 (24)
MPZ		other			0.000184	DDIT3,DERL3,FDFT1,HMGCR,HMGCS1,JUN	182 (7)
ELK4		transcription regulator		1.969	0.000184	EGR1,EGR2,EGR3,FOS,FOSL1,JUNB	241 (12)
silicon dioxide		chemical drug	Activated	2.376	0.000184	EGR1,FOS,FOSL1,JUN,JUNB,SQSTM1	308 (18)
dopamine		chemical - endogenous mammalian		1.86	0.000185	ATF3,CSRNP1,CYP4F8,DDIT3,DUSP8,EGR1,EGR3,FOLR1,FOS,FOSB,GABRG2,GPR22,HMOX1,IL27,JUN,KCND2,PLPPR1,SCN1A	370 (20)
promegestone		chemical drug	Activated	2.61	0.00019	BCL6,CCND1,CDKN1A,CEBPB,GAL,IFIT3,INHBB,MYC,PDK4,PGR,RGS2,STAT3	348 (26)
SETBP1		transcription regulator			0.000191	AR,BCL3,BCL6,CCND1,CDH10,HEY1,JAK3,KCNJ5,MYC,NTRK3,STAT3	256 (7)
TFAP2C		transcription regulator		0.014	0.000191	ALCAM,CDKN1A,CYP11A1,EGR3,EOMES,ESR1,GREB1,HK1,KITLG,MMP9,MYC	386 (16)
IL7		cytokine		1.27	0.000193	AHR,BCL2L11,CCL4,CCND2,CD274,CD8A,CDKN1A,EBF1,JAK3,LIF,MAPKAPK3,MMP9,MYC,PIM1,SOCS1,SOCS3	311 (16)
TGFB3		growth factor		1.281	0.000197	CDKN1A,COL1A2,COL3A1,FOS,FOSB,FOSL2,GJA1,JUN,MMP9,MYO10,PLAUR,SCD,SERPINE1,TSPAN2	392 (19)
ETS1		transcription regulator		1.873	0.000198	BMP4,CCND1,CD79A,CDK2,CDKN1A,COL1A2,EGR1,HMOX1,HSPB8,INSIG1,JUNB,MMP9,MYC,NFIL3,PGR,RUNX1,SERPINE1,SLC7A11,SPP1,THY1,TRPC1	420 (23)
GRB2		other		-1.667	0.0002	ACOD1,CRABP2,DLX3,GBX2,LTBR,PAX2,SLC7A1,SPRR1A,ZIC2	254 (7)
LMNB1		other	Activated	2.219	0.0002	CYP51A1,FBN1,GJA1,HMGCR,HMGCS1,HS6ST2,LMNA,MSMO1,SCD
ABL1		kinase		1.463	0.000204	BCL2L11,CCND1,CCND2,CDKN1A,GADD45A,MMP9,MYC,VIP	324 (20)
ERG		transcription regulator		1.468	0.00021	ADGRG1,AR,ARHGEF2,CHRNB4,CLDN1,DYNC1I1,ELMO1,FLNC,FOSB,LAMA5,MMP9,MYO10,NFIL3,PIM1,PLAT,PLAUR,PTPN6,RCAN2,RHOJ,SPP1,TSC22D3	369 (21)
VEGFA		growth factor	Activated	2.741	0.000213	ADAMTS1,BMP4,CCND1,CD68,CD83,CDKN1A,CLIC4,EGR1,EOMES,FOS,FOSB,GJA1,HEY1,HK1,HMOX1,JUNB,LMNA,MMP9,MVP,PIM1,PLAT,RUNX1,SERPINE1,SHMT2,SNCG,SPP1	382 (20)
MYB		transcription regulator		1.098	0.000213	CCND1,COL1A2,COL4A1,COX6A2,GSTM1,IGFBP3,JUN,KITLG,LIF,MYC,PRAG1,SDC1,Serpina3g (includes others),SHH,SLC27A2,SPHK1,SPP1,TRHR	325 (18)
folic acid		chemical - endogenous mammalian		-0.336	0.000214	CDKN1A,COL18A1,COL3A1,DDIT3,JUN,LGALS3,MMP9,MYD88,NOX4,RELA,SFRP1	343 (19)
PLX5622		chemical drug		-0.077	0.000216	C1QC,CACNB4,CCL4,CD68,CNTNAP1,GJA1,GPR84,GRIN2A,HTR1A,IL1RN,IL27,LTBR,NEFL,NELL2,RAB3C,SCN1A,SERPINF1,SMYD1,SPP1
fluoromethyl 2,2-difluoro-1-(trifluoromethyl)vinyl ether		chemical toxicant	Activated	2.621	0.000217	ATF3,GPNMB,HMOX1,HSPB1,LGALS3,SPP1,TNFRSF12A
C1QA		other		0.522	0.000217	C4A/C4B,CD274,CD68,EGR1,S100A10,SERPINE1,STAT3	356 (15)
NPPB		other		1.937	0.000217	ACAT2,COL3A1,FDFT1,HMGCR,HMGCS1,IDI1,MSMO1	290 (7)
LRP4		other			0.000221	BMP4,BMP7,SHH
USP35		peptidase			0.000221	CCND1,GREB1,MYC	245 (7)
SLC39A4		transporter			0.000221	CCND1,Mt1,NELL1
GCLC		enzyme			0.000221	FOS,JUN,JUNB	192 (7)
COL1A2	0.919	other			0.000221	CDKN1A,COL1A2,SERPINE1	240 (11)
USP17L22 (includes others)		peptidase			0.000221	JUNB,MYC,STAT3	174 (7)
carboxyamido-triazole		chemical drug			0.000221	BAG3,CCND1,FOS	352 (21)
atipamezole		chemical drug			0.000221	EGR1,FOS,JUNB	193 (7)
ibotenic acid		chemical toxicant			0.000221	CRH,FOS,JUN
cholecalciferol		chemical - endogenous mammalian	Activated	2.226	0.000224	ADGRG1,ANXA2,CD300A,CD83,CDA,CEBPB,FOS,IGFBP3,JUN,PDGFRA,PDK4,PSAT1,PVALB,SERPINE1,SPP1	339 (21)
rotenone		chemical toxicant		-0.529	0.00023	AR,CCND1,DDIT3,FOS,GADD45G,GJA1,HMOX1,HTR1B,MMP9,PAX2	373 (20)
mitomycin C		chemical drug	Activated	2.628	0.00023	ATF3,BCL2L11,CCND1,CDKN1A,DDIT3,EGR1,GADD45A,ITPRIPL2,JUN,SESN2	349 (21)
oblimersen		biologic drug		1.706	0.000231	ATF3,CDKN1A,DUSP1,GADD45A,GADD45B,IFI44,IFIT3,KLF10,MAFF
TSHZ3		transcription regulator		1.114	0.000231	ACVR1C,FMOD,FOSB,FOSL2,IER2,IGFBP3,NTRK3,PODN,TRHR
CDK9		kinase		1.457	0.000231	CCND2,CDKN1A,DDIT3,FOS,MMP9,MYC,PDK4,RUNX1,STC2	359 (20)
SFRP1	0.818	transmembrane receptor		-1.463	0.000231	CCND1,ELOVL6,MLXIPL,MMP9,MYC,PRLR,SCD,SERPINE1,SFRP1	391 (23)
FGF10		growth factor		0.437	0.000231	ANXA2,ANXA3,BMP4,CEBPB,CTSH,CYP51A1,MMP9,SCD,SHH	368 (13)
carboplatin		chemical drug		0.643	0.000231	A2M,CACNG5,CD274,GPNMB,LGALS3,MYC,PLA1A,SPP1,TNFRSF12A	162 (7)
iron		chemical - endogenous mammalian		-0.63	0.000231	CCND1,CCND2,CDKN1A,DDIT3,GADD45A,GADD45B,GADD45G,HMOX1,Mt1	330 (21)
L-cysteine		chemical - endogenous mammalian		-0.152	0.000235	FOS,MYC,PCK2,SCD	407 (24)
ST-4 SEC2 mutant superantigen		chemical reagent		-1	0.000235	ELOVL1,HMGCR,INSIG1,SCD	250 (11)
TENM1		transmembrane receptor	Activated	2	0.000235	EDNRB,GPNMB,SEMA6A,SLC1A4
genipin		chemical - endogenous non-mammalian		0.152	0.000235	CCND1,CDK2,CDKN1A,HMOX1	215 (12)
YBX3		transcription regulator			0.000235	CCND1,CLDN2,JUN,MYC
CD99		other			0.000235	FOSB,MMP9,NEFH,TUBB3	173 (7)
cordycepin		chemical drug			0.000235	ADORA1,ESR1,FOS,MYC	370 (21)
dexamethasone phosphate		chemical drug	Activated	2.449	0.000237	BCL6,DUSP1,GADD45G,Mt1,PDK4,SCN7A	170 (7)
ML290		chemical reagent	Inhibited	-2.449	0.000237	COL1A2,COL3A1,COL6A3,IGFBP3,INHBB,PDGFRA
zerumbone		chemical - endogenous non-mammalian		0.625	0.000237	BBC3,CCND1,DDIT3,HMOX1,MMP9,MYC	278 (11)
CTR9		other		0	0.000237	EGR3,GREB1,MYC,PGR,RASGRP1,SDC1	289 (12)
TGFB1I1		transcription regulator		-0.735	0.000237	AR,CDKN1A,FOS,LTBP1,NOX4,SERPINE1	407 (22)
ACVR1C	1.874	kinase		0.896	0.000237	CCND1,CDK2,CDKN1A,FOS,JUNB,SERPINE1	371 (22)
THZ2		chemical drug		-1.633	0.000237	CCND1,CDKN1A,FOSL2,GLI2,LIF,MYC	170 (4)
7-ketocholesterol		chemical - endogenous mammalian	Activated	2.392	0.000237	DDIT3,EGR1,GNAI1,KLF6,NOX4,RELA	171 (7)
miR-155-5p (miRNAs w/seed UAAUGCU)		mature microRNA	Inhibited	-2.395	0.000238	ARL10,BCL2L11,CCL4,CCND1,CEBPB,CLDN1,CYP51A1,DSG2,LPL,MYD88,MYO10,PLXND1,RAB27B,RAB6A,RIPK1,SERPINE1,SOCS1	304 (20)
Gsk3		group		0.118	0.000239	BBC3,BCL2L11,CCND1,DDIT3,ESR1,FOS,FOSB,HMGCR,JUN,MYC,SPP1	330 (21)
rottlerin		chemical drug		-0.2	0.000239	CCND1,CDKN1A,CLDN1,COL3A1,DDIT3,HMOX1,JUN,LPL,MMP9,PRKCD,RGS2	350 (19)
MM-589		chemical reagent		-1.161	0.000242	COL1A2,COL3A1,FBLN1,FBLN2,KCNJ5,PDGFRA,RND1,TNNT2
SUZ12		enzyme		0	0.000243	CALB2,CYP26A1,IGFBP3,INSIG1,LAMB3,LGALS3,LITAF,MYC,Nes,NKD1,PCDH10,PCDH20,PGR,SLC7A5,TNFRSF1B	241 (13)
NREP		other		1.342	0.000256	COL3A1,ITGA3,ITGA5,MMP9,PDGFRA
H3-3A/H3-3B		other			0.000256	BBC3,CD79A,CDKN1A,EGR1,PDGFRA	271 (12)
THRB		ligand-dependent nuclear receptor		-0.573	0.000256	BCL3,CCND1,CCND2,CFTR,CTSH,FOS,FOSL1,FRZB,GSN,IGFBP3,JUN,LPL,MLXIPL,MMP9,MYC,NKD1,PCSK2,PDK4,SERPINE1,SFRP1,SLC25A45,SLC7A11,SPP1,Sprr2g	355 (23)
metronidazole		chemical drug		0.535	0.000257	ALCAM,BMP4,BMP7,CCND1,CD63,COL3A1,FOS,GRM1,JUNB,LGALS3,MYO1B,SCOC,SPP1,STAT3	326 (16)
TREM1		transmembrane receptor	Activated	2.107	0.000262	ATF3,ATP1B1,CD274,CD83,CEBPB,EGR1,EGR2,EGR3,FOSL1,GADD45B,HECW2,LIF,LPL,MAFF,MMP19,MYD88,OSGIN1,SPP1,STARD4	385 (20)
TEAD4		transcription regulator		0.647	0.000263	BMP4,CCND1,CDKN1A,COL3A1,EOMES,FIBIN,GLI2,JUN,JUNB,LOXL1,NOTCH3,PCDH18,TNNT2	205 (10)
Calcineurin A		group		1.172	0.000265	CCND1,COL1A2,COL3A1,FOS,GJA1,JAK3,JUN	343 (21)
Smad2/3-Smad4		complex	Activated	2.602	0.000265	CDKN1A,COL1A2,GLI2,IGFBP3,MYC,NOX4,SERPINE1	290 (19)
ANXA2	0.578	other		-0.311	0.000265	CDKN1A,GADD45A,IGFBP3,JUN,MYC,S100A10,SESN2	273 (19)
ZBTB7A		transcription regulator		-1.342	0.000265	BBC3,BCL2L11,CDK2,CDKN1A,FOS,MYC,RELA	391 (21)
abemaciclib		chemical drug		1.979	0.000265	ESR1,IGFBP3,LIF,LYNX1,PGR,PLAT,VGF
IGFBP2		other		-0.579	0.000266	CCND1,DDAH1,ELOVL6,ESR1,IGFBP3,ITGA5,MYC,PTGFRN,STAT3	453 (22)
STEAP3		transporter	Inhibited	-3	0.000266	ANXA2,CEBPB,COL3A1,ITGA5,NUPR1,S100A10,TGM2,TNFRSF12A,ZYX
5-fluorouracil		chemical drug	Activated	2.49	0.000266	ANXA2,ATF3,BBC3,BCL2L11,CCND1,CCND2,CDK2,CDKN1A,COL1A2,EGR1,GADD45A,GAP43,GSN,HMOX1,JUN,LIF,MMP9,MVP,MYC,OSGIN1,PHLDA3,SDC1,SLC7A11,SPHK1,SPP1,SQSTM1,TNFRSF12A,TRIB3,ZFP36L1	351 (18)
PRNP		other		0	0.000268	AHR,CCND1,EGR1,FGF9,FOSL1,GJA1,HSPB1,MYC,PLAUR,RELA,SNAP25	361 (21)
SKIV2L		enzyme	Inhibited	-2.138	0.000284	HMGCR,KRT6B,MTHFD2,S100A9,SHMT2,SLC7A11,SLC7A5,TRIB3
FLT3		kinase			0.000284	BCL2L11,CCND2,CEBPB,IFIT3,MYC,NOX4,PIM1,PTPN6	270 (23)
ZFP36		transcription regulator	Inhibited	-2.781	0.000285	CDKN1A,COL3A1,FOS,FOSL1,JUN,KIF14,LTF,PIM1,PLAUR,S100A9,SOCS1,SPP1	331 (20)
KMT2A		transcription regulator		-0.673	0.000285	BAG3,BCL6,CDKN1A,EGR1,KLF6,LRRC55,MYC,PGR,RGS4,SATB2,SCN1A,ZMAT4	337 (22)
colistin		biologic drug		0.277	0.000288	ALCAM,BMP4,BMP7,CCND1,CD63,FOS,GRM1,JUNB,LGALS3,MYO1B,SCOC,SPP1,STAT3
VIP	-0.62	other		-0.491	0.000288	CCL4,CCND1,CD274,CEBPB,CFTR,CLCF1,EGR2,EGR3,FOS,MYC,RELA,TRHR,VIP	361 (20)
DLX1		transcription regulator		0.493	0.000295	BMPER,EDIL3,FBLN1,GBX2,GJA1,PAX2,RGS4,SDC1,SERPINE1,ZFP36L1
F3		transmembrane receptor		1.265	0.000295	BRINP3,EGR1,FOS,GJA1,MAPKAPK3,MDK,MMP9,SEMA3A,SERPINE1,TGM2	283 (18)
SPP1	0.53	cytokine		0.417	0.000298	BCL2L11,CCL4,CCND1,CDK2,CDKN1A,CYP39A1,DSP,FOS,HMGCR,HMOX1,INSIG1,ITGA3,JUN,LIF,MMP9,MYC,SERPINE1,SERPINF1,SPP1	362 (21)
PIN1		enzyme		1.913	0.000298	CCND1,CD274,CDKN1A,COL3A1,DDIT3,ESR1,MMP9,MYC,NOTCH3,PGR,TBC1D31	371 (24)
Smad		complex		1.282	0.000302	CDKN1A,COL1A2,GLI2,MYC,SERPINE1,VIP	378 (15)
UCP2		transporter			0.000302	ESR1,HDC,LPL,MYC,RELA,SCD	382 (22)
SOX6		transcription regulator		0.162	0.000302	CALB2,CCND1,CDKN1A,HSPG2,MYC,SOCS3	401 (26)
MSX1		transcription regulator		0.18	0.000302	BMP4,CDKN1A,EGR2,GJA1,SFRP1,SHH
NKX3-1		transcription regulator			0.000305	AR,FOS,IGFBP3,MMP9,MYC,PIM1,RUNX1,SDC1,STAT3	401 (25)
CD5		transmembrane receptor	Activated	2.132	0.000305	BCL3,CCL4,CEBPB,MSMO1,PCK2,PIM1,SIPA1,STAT3,WNT10A	317 (15)
semaxinib		chemical drug	Activated	2.138	0.000309	AHR,ATF3,C1QC,CD8A,EGR1,EGR2,FGF12,FOS,HMOX1,LTF,MMP9,PRKCQ,RASGRP1,SERPINE1,SOCS3	399 (22)
NR1H3		ligand-dependent nuclear receptor		-1.014	0.000317	ATF3,CCL4,CD274,CD68,CDKN1A,CH25H,CLEC4E,DDX60,FDFT1,GPX3,GSTM5,HELLS,HK1,HMGCR,IL1RN,LPL,MLXIPL,MMP9,Mt1,SCD,SOCS1	402 (23)
eplerenone		chemical drug		-1.655	0.00032	CD68,CRH,LGALS3,MMP9,NOX4,SERPINE1,SPP1	356 (18)
monocrotaline		chemical toxicant		0.785	0.000332	BCL6,CCND1,FGF12,GADD45A,GAP43,HMOX1,MMP9,NOTCH3,SPP1,TUBB3	329 (21)
lipoxin A4		chemical - endogenous mammalian		1.162	0.000332	CCND1,CDKN1A,CFTR,ESR1,GREB1,HMOX1,PGR,SERPINE1	417 (25)
PRKACA		kinase		1.761	0.000332	BCL2L11,CCND1,CCND2,CEBPB,MYC,SDC1,Sik1,SOCS3	331 (23)
TGFA		growth factor	Activated	2.82	0.000332	CCND1,CDKN1A,CEBPB,ESR1,FOS,FOSL2,JUNB,MMP9,PLAT,S100A10,SERPINE1	381 (21)
NKX2-1		transcription regulator		0.526	0.000341	ADCYAP1,BMP4,EDIL3,ENPP2,HELLS,HLA-A,KITLG,NECTIN3,Nes,NKD1,PDGFRA,SCD,SCN7A,SERPINE1,SHH,THY1,TMEM37,UGT8
CCN2		growth factor		0.613	0.000345	ADAMTS1,CCND1,COL4A2,EGR1,ESR1,HAPLN1,JUN,KITLG,LOXL1,MMP9,MYC,PTGFR,SERPINE1	335 (23)
kanamycin A		chemical drug		0.277	0.000345	ALCAM,BMP4,BMP7,CCND1,CD63,FOS,GRM1,JUNB,LGALS3,MYO1B,SCOC,SPP1,STAT3
PTPRJ		phosphatase		0	0.000349	ARID5A,CCL4,FOS,HDC,Mx2,PLA1A,PLAT,PLAUR,SLFN12L	308 (19)
MNT		transcription regulator	Inhibited	-2.121	0.000349	ATP1B1,BCL6,CCND2,DDIT3,GADD45B,KLF10,KLF6,MYC,Serpinb6c
di(2-ethylhexyl) phthalate		chemical toxicant	Activated	2.395	0.000349	AR,CCND2,EGR1,FOS,FOSB,JUN,MYC,MYD88,PGR	365 (16)
9,10-dimethyl-1,2-benzanthracene		chemical toxicant	Activated	2.069	0.000349	AHR,CCND1,CDKN1A,GADD45A,JUN,MMP9,RUNX1,S100A9,SERPINE1	306 (18)
leukotriene C4		chemical - endogenous mammalian	Activated	2.233	0.000351	CCL4,EGR1,EGR2,EGR3,FOS	376 (23)
DDX17		enzyme		1.053	0.000351	CCND1,CDKN1A,FOSL1,JUN,MYC	368 (13)
premarin		chemical drug		0.314	0.000351	GREB1,LTF,MYC,PGR,SERPINE1	265 (7)
decursin		chemical - endogenous non-mammalian		-0.6	0.000351	CCND1,CDK2,CDKN1A,MMP9,MYC	377 (23)
mevastatin		chemical drug		0.218	0.000351	ADAMTS1,AR,BMP4,CDKN1A,HMGCR
canrenoate potassium		chemical drug	Inhibited	-2.2	0.000351	CD68,CDKN1A,COL3A1,LGALS3,SPP1
miR-124-3p (and other miRNAs w/seed AAGGCAC)		mature microRNA	Inhibited	-3.255	0.000356	AHR,CDK2,DDIT3,DHCR24,EGR1,ELOVL1,ENDOD1,GSN,LGALS3,LITAF,MYH9,MYO10,NIBAN2,OAF,PDLIM7,RDH10,RELA,SQSTM1,STAT3,TUBB6,VSNL1
phytohemagglutinin		chemical drug	Activated	2.017	0.000358	BCL3,CCL4,CCND2,CD83,CHML,CHN1,COL18A1,COL1A2,COL4A5,EGR1,FBN1,FOS,FOSL2,GNAI1,HTR1A,JAK3,MMP9,OMG,PLCD1,PRLR,RIPK1,SLC6A8,SPHK1,SPP1,STAT3	283 (18)
ciglitazone		chemical drug		0.677	0.000361	CCND1,CDK2,CDKN1A,CRABP2,DNMT3B,EOMES,ESR1,GAL,GSN,IFITM2,MMP9,Nes,NOX4,SERPINE1,TUBB3	399 (23)
KLF2		transcription regulator		-1.182	0.000364	APLN,BCL3,BMP4,CCL28,CCL4,CDKN1A,COL4A1,FBLN1,GADD45A,JUNB,KITLG,MVP,MYC,NOTCH3,RELA,SERPINE1,STAT3,TNFRSF4	347 (16)
IL15		cytokine		1.837	0.000366	AHR,BBC3,BCL2L11,CCL4,CCND1,CCND2,CD274,CD83,CD8A,CDKN1A,CEBPB,EGR2,EOMES,HK1,HMOX1,IL1RAP,JUN,JUNB,LIF,MAPKAPK3,MYC,MYD88,NFIL3,OGN,PDE4B,PGM2,PIM1,PTP4A1,SERPINE1,SOCS1,SORL1,SYNPO,TKTL1,ZFP36L1	372 (19)
RHO		G-protein coupled receptor		-1.667	0.000373	CEBPB,COL1A2,DDIT3,FBLN1,FOS,Mt1,PCOLCE,PRPH,SHH,TRPC1	286 (20)
EIF6		translation regulator		-0.277	0.000377	ACAT2,ACOT2,ANXA2,COL3A1,COL4A1,DHCR24,FADS3,FGF9,HMGCR,HMGCS1,LAMB3,SCD,SORL1
17-alpha-ethinylestradiol		chemical drug		0.684	0.000379	BCL3,C1QC,CD68,CDKN1A,CYP7B1,FBLN2,FOS,INHBB,JUN,MMP9,NR1H4,PGR,SLC11A1,SOCS1,TGM2,ZYX	431 (19)
leukotriene B4		chemical - endogenous mammalian		1.009	0.00038	CRH,JUN,MMP9,MYD88,NOX4,SOCS1	376 (20)
CDC73		other		-0.085	0.00038	CCND1,HMGA1,LGALS3,MYC,RUNX1,SOCS1	221 (13)
P2RY2		G-protein coupled receptor		1.698	0.00038	CCND1,CDKN1A,GAP43,JUN,SERPINE1,SESN2	329 (19)
SRD5A1		enzyme		0.152	0.00038	AR,CLDN1,CLDN2,CYP11A1,HMGCR,Mt1
EXT1		enzyme		1.715	0.00038	BMP4,CCND1,CEBPB,FGF1,MYC,SHH	394 (25)
Shc		group		1.961	0.00038	CCND2,FOS,LPL,MYC	373 (22)
PPM1D		phosphatase		-1.067	0.00038	CCND1,CDKN1A,PGR,RELA	378 (25)
FRMD6		other		0.577	0.00038	CDKN1A,FGF1,IGFBP3,RASSF4
IL9R		transmembrane receptor			0.00038	BCL3,JUNB,MYC,PIM1	208 (15)
RCOR2		transcription regulator			0.00038	INA,NEFH,Nefm,SCN2A
ulixertinib		chemical drug		-1	0.00038	AHR,COL18A1,COL1A2,COL3A1
INCB054329		chemical drug		-1.091	0.00038	CCND1,CCND2,MYC,STAT3	236 (11)
acetic acid		chemical - endogenous mammalian		1.998	0.00038	EGR1,FOS,JUN,JUNB	276 (11)
tiron		chemical reagent		-1	0.00038	CDKN1A,DUSP1,HMOX1,PLAUR	332 (19)
ACVRL1	0.349	kinase	Inhibited	-2	0.000384	CDKN1A,JUP,MYC,PLAT,PLAUR,SERPINE1,ZYX	331 (17)
4-tert-octylphenol		chemical toxicant		-0.137	0.000384	AR,CLSTN2,EMP1,ESR1,MYC,PGR,RESP18	317 (13)
benzyl isothiocyanate		chemical - endogenous non-mammalian		-1.619	0.000387	BCL2L11,CCND1,FOS,MYC,RHOC,SERPINE1,STAT3,ZBTB10	279 (20)
cyclopamine		chemical reagent		0.035	0.000387	CCND1,CDKN1A,CYP11A1,GLI2,INSL3,SERPINE1,SHH,SPP1	340 (16)
RUNX2		transcription regulator		0.205	0.000389	C4A/C4B,CCND1,CDKN1A,COL1A2,COL24A1,FLRT2,GADD45B,HAPLN1,LGALS3,PCDH18,RUNX1,SERPINE1,SHH,SPP1	361 (21)
STIM1		ion channel		1	0.000397	ATF5,CDKN1A,FGF9,FOSL1,HMOX1,ITGA5,JUNB,KLF10,MYC	363 (16)
HBEGF		growth factor		1.182	0.000397	AR,BCL3,CCND1,CCND2,EGR1,GJA1,IGFBP3,MMP9,PDK4	401 (18)
MAP3K8		kinase		1.199	0.000407	CCL4,EGR1,FOS,GNG4,GPR176,JUN,JUNB,LAD1,MMP9,NFAM1,P2RY1,PGR,PLAT,SLFN12L,SOCS3,TUBB2B	337 (18)
DIO2		enzyme		-0.788	0.000407	ANKRD34C,ATF3,EGR1,FOS,FOSB,GADD45G,GREM2,HAPLN1,HS3ST5,MARCKSL1,NEFH,Nefm,SBNO2,SCUBE1,ST8SIA2,TSPAN18
PP2/AG1879 tyrosine kinase inhibitor		chemical drug		-1.951	0.00041	BCL2L11,CDKN1A,DSP,DUSP1,FOS,HMOX1,JUP,RELA,RHOC,SERPINE1,SPP1	319 (20)
mycophenolic acid		chemical drug		0.905	0.00041	AKAP12,ATF3,CCND2,CD274,CD63,CDKN1A,CLDN1,DUSP1,KRT6B,RGS4,SERPINE1	357 (20)
erlotinib		chemical drug	Activated	2.346	0.000411	BBC3,BCL2L11,EGR1,FBN1,IGFBP7,LIF,MYD88,NOX4,PLAUR,RIPK1,SERPINE1,TIRAP,TNFRSF1B	387 (20)
plicamycin		chemical drug		-1.893	0.000411	AHR,BBC3,CDKN1A,COL1A2,HMGCR,HMOX1,OLFM1,PLAUR,PRKCD,SERPINE1,SNAP25,SOCS3,SQSTM1	406 (21)
GDNF		growth factor	Activated	2.135	0.000419	AR,CALB2,CCND1,EGR1,EGR2,FOSB,HTR1A,NRN1,SPHK1,TUBB4A	387 (22)
olanzapine		chemical drug		1.313	0.00042	ANGPTL2,ATF3,COL1A2,CYP11A1,FOS,HMGCR,HMGCS1,HMOX1,IL1RAP,RGS2,S100A9,SNCG	364 (22)
cobalt chloride		chemical reagent		1.502	0.00042	ADAMTS1,BBC3,CD274,CDKN1A,COL18A1,DUSP1,HIF3A,HMOX1,PLAUR,SERPINF1,SORL1,SPHK1	334 (17)
BCR (complex)		complex	Activated	3.38	0.000434	ATF3,BCL2L11,BCL3,BCL6,CCL4,CCND1,CCND2,CD300A,CDK2,CDKN1A,CLCF1,EGR1,EGR2,FOS,FOSB,FOSL2,HK1,JUNB,MYC,PIM1,PPP1R18,RELA,S100A10,TES,ZNF217	317 (22)
MLX		transcription regulator		-1.572	0.000449	ATF3,BCL2L11,ELOVL6,EOMES,IGFBP3,IL1RN,MLXIPL,SCD
dimethylnitrosamine		chemical toxicant		0.277	0.000449	CDKN1A,COL1A2,COL3A1,COL4A1,HMOX1,MMP9,Mt1,TGM2	420 (18)
quinolinic acid		chemical - endogenous mammalian	Activated	2.074	0.000449	EGR1,FOS,FOSB,JUN,JUNB,MYC,NTRK3,SQSTM1	402 (19)
omeprazole		chemical drug			0.000449	A2M,ADORA1,CDKN1A,EGR1,FOS,HDC,RESP18,WFDC1	270 (14)
HDAC5		transcription regulator		-1.091	0.000454	CDKN1A,EGR2,ETNPPL,GAP43,HMGCR,JUN,KLF6,LPL,MYC,SCD,TUBB3	392 (25)
LGALS1		other		1.46	0.000454	AHR,CCND2,CDKN1A,GALNT16,GPAT3,INSIG1,LGALS3,MMP9,SERPINE1,SOCS3,SPP1	389 (20)
amphetamine		chemical drug	Activated	2.182	0.000454	ATF3,BMP4,EGR1,EZR,FOS,FOSB,FOSL1,FOSL2,JUN,JUNB,RGS2	352 (21)
apigenin		chemical - endogenous non-mammalian		-0.552	0.000454	APLN,AR,CCL4,CCND1,CCND2,CDK2,CDKN1A,FOS,HMOX1,MMP9,RELA	349 (20)
PRKCQ	-0.904	kinase		0.165	0.000458	CCND1,CDKN1A,EZR,FOSL1,MMP9,STAT3,TNFRSF4	397 (23)
PML-RARA		fusion gene/product			0.000458	CDKN1A,EGR1,FOS,HMOX1,JUN,MYC,S100A10	362 (17)
15(S)-HETE		chemical - endogenous mammalian		1.432	0.000471	EGR1,FOSB,FOSL1,HMGCR,JUN	389 (25)
PPP4R3B		other			0.000471	CALB2,EOMES,IRX1,MYT1L,TUBB3
Endothelin		group		1.406	0.000471	APLN,FOS,JUN,MYC,RELA	302 (17)
PHB2		transcription regulator		0.314	0.000471	GJA1,PGR,SOCS1,SOCS3,STAT3
PDGFRA	0.327	kinase		1.96	0.000471	CDKN1A,FOS,MYC,PDGFRA,PRKCQ	350 (22)
CD300LF		other		0.816	0.000473	APOBR,HK1,IL1RN,MMP9,PCK2,PGM2	207 (7)
SOX4		transcription regulator		1.972	0.000485	ARPP21,B3GNT8,BBC3,CHAC1,EMB,EMP1,EOMES,FOS,Ifitm1,MARCKSL1,MEX3A,Mt1,PLXND1,SEMA3A,SEMA3C,SLC7A3,TES,Tpm4,TUBB2B
SYVN1		transporter	Activated	2.84	0.000487	AHR,CCND1,CDA,DUSP1,FOLR1,HLA-A,HSPB1,IFI44,IFITM2,ITGA3,LDHB,SLC3A2,SLC7A5,UNC13D,ZC3HAV1	147 (6)
NFYA		transcription regulator		1.414	0.000502	BBC3,CDKN1A,COL1A2,COL5A3,EGR1,GADD45A,GADD45B,JUN,JUNB,RGS4,SCD	399 (23)
POMC		other		1.575	0.000505	CRH,CYP11A1,DUSP1,FOS,FOSL1,FOSL2,GSTM5,HMOX1,JUN,JUNB,Sik1,UCN	384 (21)
ALK		kinase			0.000512	CCND2,CD274,COL3A1,EGR2,EGR3,FOS,SERPINE1,SHH,STMN4	346 (19)
EGR3	1.311	transcription regulator	Activated	2.789	0.000519	BCL6,EFNB1,INHBB,JUN,MYC,PLXND1,SOCS1,SOCS3	338 (21)
TFAP4		transcription regulator		0.371	0.000519	CDK2,CDKN1A,CLDN1,EGR1,ETV1,FOS,GLI2,LIF	253 (7)
CALR		transcription regulator		-0.744	0.000519	CDKN1A,COL1A2,COL3A1,CRABP2,CTTN,DDIT3,GJA1,LPL	372 (24)
SP4		transcription regulator			0.000519	CCL28,CCND1,CDKN1A,IL1RN,KITLG,PRKCD,RELA,STAT3
TXN		enzyme		0.761	0.000519	BCL6,CCND2,CDKN1A,ESR1,FOS,HMOX1,MMP9,RELA	311 (17)
sorafenib		chemical drug		-0.747	0.000519	ATF5,CCND1,CCND2,DDIT3,PIM1,SCD,SLC7A11,SOCS1	292 (17)
TAL1		transcription regulator		-0.336	0.000523	ADGRG1,ARPP21,BCL6,CDKN1A,CHST11,CPLX1,DSG2,FBN1,HELLS,HLA-A,JUN,KIF14,LMO1,MYC,NEFL,P2RY1,PLEKHO1,RELA,RUNX1,TTC3	279 (15)
ADRA1		group			0.000536	EGR1,FOS,JUNB	324 (20)
ZMIZ2		transcription regulator			0.000536	CCND1,JUN,MYC
DRD1/5		group			0.000536	FOS,GNAL,NAT8L
EIF3I		translation regulator			0.000536	CCND1,MYC,SERPINE1	269 (7)
AZD1480		chemical drug			0.000536	SLC3A2,SLC7A5,SOX11
BRCA2		transcription regulator			0.000536	BBC3,CDKN1A,SERPINE1	241 (12)
ASH2L		transcription regulator			0.000536	DDIT3,ESR1,MMP9	147 (7)
GCLM		enzyme			0.000536	FOS,JUN,JUNB
CLDN2	2.003	other			0.000536	CCND1,ITGA5,MMP9	359 (15)
MI-773		chemical drug			0.000536	BBC3,BCL2L11,CDKN1A	252 (7)
scoparone		chemical - endogenous non-mammalian			0.000536	CCND1,MYC,SOCS3	174 (7)
silicon phthalocyanine		chemical drug			0.000536	CCND1,CDK2,CDKN1A	377 (22)
CBFB-MYH11		fusion gene/product			0.000536	ATF3,JUN,SPHK1	285 (10)
STAT		group		1.979	0.000543	A2M,CDKN1A,FOS,JUNB,SOCS1,SOCS3,VIP	255 (10)
TRIM37	-0.422	enzyme	Inhibited	-2.414	0.000543	BCL2L10,CD63,CDT1,CLDN1,EGR1,SFRP1,TNNT2	341 (7)
CASZ1		enzyme		0.378	0.000543	GRIN3A,HTR1B,ITGA7,KCND2,NEFL,Sik1,TNFRSF1B
KDM2B		enzyme		0.2	0.000543	CDKN1A,CRABP2,EOMES,FOS,LAMA5,NSG2,PDGFRA	390 (23)
arginine		chemical - endogenous mammalian		-0.333	0.000543	DDIT3,EGR1,HDC,MYC,PCK2,SCD,SLC7A5	353 (19)
CTF1		cytokine		0.644	0.000543	A2M,ENPP2,FOS,JUNB,SOCS1,SOCS3,VIP	222 (15)
SLC16A2		transporter		-0.378	0.000543	HAPLN1,MARCKSL1,NEFH,Nefm,SCUBE1,SHH,SLC7A5
POU4F2	-2.311	transcription regulator			0.000543	CALB1,IRX4,POU4F1,POU4F2,POU4F3,SHH,ZIC2
lisinopril		biologic drug		-1.134	0.000543	CAST,Chil3/Chil4,FOS,GBP6,JUN,MMP9,S100A9	264 (12)
steroid		chemical - endogenous mammalian		0.372	0.000543	FOS,GAP43,HTR1A,MYC,PLAT,PRKCD,SPP1	416 (22)
miR-30c-5p (and other miRNAs w/seed GUAAACA)		mature microRNA	Inhibited	-2.29	0.000575	BCL6,CCND1,COL1A2,COL4A1,COL4A2,COL4A5,HEY1,JUN,MYC,MYO10,NID2,PTGFRN,RAB27B,SLC7A1,SLC7A11,THEM4	256 (7)
FOXD1		transcription regulator			0.000579	ISL2,SERPINE1,SHH,ZIC2
PTCSC3		other		-1.131	0.000579	CCND1,MMP9,MYC,STAT3	174 (7)
LGALS7/LGALS7B		other		-1.044	0.000579	COL1A2,EGR1,MMP9,SERPINE1	375 (14)
TBX1		transcription regulator		1.067	0.000579	BMP4,CDKN1A,GBX2,OTX1
ELK3		transcription regulator		-1.729	0.000579	EGR1,FOS,HMOX1,SERPINE1	196 (7)
Ncoa6		transcription regulator			0.000579	FOS,LPL,SCD,SERPINE1	245 (12)
clioquinol		chemical drug		1	0.000579	CCND1,CDKN1A,FOS,JUN	407 (24)
enterolactone		chemical - endogenous mammalian		1	0.000579	CCND1,ESR1,IL1RN,SPP1	223 (7)
2,2-bis(4-hydroxyphenyl)-1,1,1-trichloroethane		chemical - endogenous mammalian		1.732	0.000579	AR,CYP11A1,ESR1,PGR	373 (15)
allopregnanolone		chemical - endogenous mammalian		-1.131	0.000579	CRH,FOS,GRIN2A,LGALS3	297 (19)
TFPI2		other		0.816	0.000582	ADCYAP1,ATF3,CCND1,GADD45B,HTR1D,JUNB	196 (7)
1-methyl-4-phenylpyridinium		chemical toxicant		1.47	0.000582	BBC3,BCL2L11,CCND1,DDIT3,TRIB3,TRPC1	350 (20)
oxaliplatin		chemical drug		-0.073	0.000584	ANXA2,BBC3,BCL2L11,CCND1,CDKN1A,GAP43,HELLS,HTR1A,SQSTM1,STAT3	355 (23)
cadmium		chemical toxicant		1.775	0.000584	CCND1,CDKN1A,CYP26A1,HMOX1,JUN,LGALS3,Mt1,MYC,PGR,SERPINF1	402 (21)
BAPTA-AM		chemical reagent		-0.788	0.000597	ATF3,CDKN1A,DDIT3,EGR1,FOS,JUN,SOCS1,SOCS3	294 (18)
QKI		other		-1.679	0.00061	CYP51A1,DHCR24,FDFT1,HMGCR,HMGCS1,IDI1,MSMO1,NSG2,SCD,TNNT2,TUBB2B
NEDD9		other		1.943	0.00061	ALOXE3,AOAH,BMPR1B,FOS,GALNT14,MMP9,NELL1,NRN1,PPP2R2C,SERPINE1,TPPP3	344 (19)
RHOJ	0.39	enzyme			0.000619	AKAP12,GSN,LRP1B,MYH9,PLAT
PROM1		other	Activated	2.236	0.000619	DHCR24,DSG2,HMGCS1,IDI1,INSIG1	125 (6)
CREBZF		transcription regulator		-0.692	0.000619	CEBPB,DDIT3,INSIG1,MAPK10,PDK4	187 (7)
TFEC		transcription regulator			0.000619	COL6A3,ELAVL4,GBP7,MYH9,S100A9
S100B		other		0.391	0.000619	CDKN1A,FOS,JUN,MYC,NEFL	309 (20)
ITGA6		transmembrane receptor		0.083	0.000619	CCND2,ENPP2,ITGA3,ITGA7,RELA	349 (15)
phencyclidine		chemical drug		1.54	0.000619	FOS,GAL,HDC,PVALB,RGS4	314 (17)
diethylmaleate		chemical toxicant		1.488	0.000619	CDKN1A,GBE1,HMOX1,SLC3A2,SLC7A11	136 (7)
tanespimycin		chemical drug		-0.284	0.000622	AHR,AR,CCND1,CDKN1A,DDIT3,FDFT1,HMGCR,HMGCS1,JUN,MYC,PDGFRA,SCD,SERPINE1,STAT3	365 (21)
GSE1		other			0.00064	FOS,IFIT3,IL1RN,ITGA7,PCOLCE,SLC7A5,STAB1
NSD2		enzyme			0.00064	BACE2,CCND2,FOS,GADD45A,JUN,STAT3,TUBB4A	340 (20)
TGS1		enzyme		-1.912	0.00064	CCND1,CCND2,CDK2,CHAC1,DDIT3,SESN2,TRIB3	213 (7)
CAMK4		kinase	Activated	2.382	0.00064	ATF3,CDKN1A,FOS,FOSB,FOSL2,JUN,JUNB	397 (22)
piceatannol		chemical - endogenous non-mammalian		-0.059	0.00064	BCL2L11,BCL6,CCND1,CCND2,HMOX1,MMP9,MYC	345 (20)
miR-34a-5p (and other miRNAs w/seed GGCAGUG)		mature microRNA		-0.732	0.000648	ARPP21,ATF3,BVES,CACHD1,CCND1,CCND2,CDKN1A,FAM110C,IFITM2,MYC,PLCB1,POU3F2,PPP1R1C,SHISA2,SLC27A2	335 (20)
KL		enzyme		0.532	0.000653	ATF3,CAST,CCND1,CDKN1A,DDIT3,EGR1,KCND2,MMP9,MYC	378 (24)
N-ethyl-N-nitrosourea		chemical toxicant		0	0.000653	CDKN1A,GSTM1,IFI44,IFIT3,Mt1,Mx2,SPP1,TGM2,TNFRSF1B
FLCN		other		-0.173	0.000671	ADAMTS1,ADGRG1,ANKRD34B,ANXA3,BCL2L11,GPNMB,HMOX1,MT-ATP6,PLXND1,SEMA6A,SERPINE1,TMTC1,UAP1L1,WLS
PKM		kinase		1.792	0.000671	CCND1,CD274,EGR1,MMP9,MT-ATP6,MYC,PCK2,PDK4,RELA,STAT3,TGM2	396 (19)
PAX3		transcription regulator	Inhibited	-2	0.000675	BMP4,CDKN1A,COL1A2,CTTN,EGR2,FGF9,GSTM5,HSPG2,IFITM2,LAMB3,MMP9,OLFM1,PCSK2,PHGDH,PRMT2,PTP4A1,ST8SIA2,TRPC1	259 (7)
hyaluronic acid		chemical - endogenous mammalian	Activated	2.757	0.000677	BCL3,CCL4,CD83,CTTN,FOS,JUN,MMP9,MYD88,RHOC,SERPINE1,SOCS3,SPHK1,SPP1	332 (21)
prednisolone		chemical drug		-0.768	0.000682	BAG3,BCL2L10,Chil3/Chil4,DUSP1,ESR1,GPX3,HEY1,MYH9,NFIL3,NOTCH3,PLAT,RELA,SOCS1,SOD3,SPP1,SQSTM1,TGM2,TMEM43,TMEM74,TSC22D3,TUBA4A	481 (21)
LIN28A		other		1.617	0.000684	AR,CCND1,CDK2,CDKN1A,COL1A2,COL4A5,MYC,SCD	387 (20)
candesartan		chemical drug	Inhibited	-2.13	0.000684	COL1A2,COL3A1,CRH,FOS,FOSL2,SERPINE1,SPP1,TRPC1	346 (26)
VCAN		other		-0.51	0.000702	C4A/C4B,CCL4,CDKN1A,CEBPB,ENPP2,FBLN5,IFI44,IL1RN,INHBB,ITGA3,ITGA5,LGALS3,MMP9,NOTCH3,OGN,RGS2	359 (22)
VEGFA-antisense		other			0.00071	APLN,FGF1,HIF3A,IL1RN,MDK,MMP19
trans-cinnamaldehyde		chemical drug	Activated	2.393	0.00071	CDKN1A,DDIT3,EGR1,HMOX1,SERPINE1,SRXN1	266 (9)
MAP3K12		kinase	Activated	2.177	0.00071	JUN,NRN1,POU4F1,STAT3,STMN4,TUBB2B	261 (7)
CDKN2B		transcription regulator		0	0.00071	DNMT3B,GLUL,PHGDH,PSAT1,PYCR1,SERPINE1
HOXB13		transcription regulator		-1.633	0.00071	AR,CCND1,CDKN1A,LRRN1,MYC,SEMA3A	379 (13)
nitroarginine		chemical reagent		1.78	0.00071	EGR1,HMGCR,HMOX1,NFIL3,PLAT,SPP1	395 (21)
NR1H2		ligand-dependent nuclear receptor		-1.43	0.000718	CCL4,CH25H,Chil3/Chil4,DDX60,ELOVL6,FDFT1,HK1,HMGCR,IL1RN,LPL,MMP9,SCD	251 (18)
ZNF217	0.365	transcription regulator		1.134	0.000721	EOMES,HAPLN1,IGFBP3,MYC,MYO1B,NEFL,NMNAT2,PLAT,SEMA3A,VSNL1
ursolic acid		chemical drug		-0.943	0.000721	ATF3,CCND1,CDKN1A,EIF4EBP1,FOS,MMP9,MYC,RELA,STAT3,TUBB4A	382 (24)
etoposide		chemical drug		1.068	0.000727	ATF3,BBC3,BCL2L10,BCL2L11,CCND1,CD274,CDKN1A,COL1A2,DUSP1,GADD45A,GADD45G,HK1,Hrk,JUN,MYC,NOTCH3,RELA,SPHK1,SQSTM1	351 (16)
GLI2	0.773	transcription regulator		0.767	0.000733	BMP4,CCL4,CCND1,CCND2,CDKN1A,DLX3,GLI2,JUNB,MMP9,MYC,PAX2,SFRP1,SPP1	401 (25)
MAFB		transcription regulator		1.897	0.000733	ALCAM,CCL4,CCND2,CRHBP,EGR2,ESR1,FBLN5,LGALS3,LGI3,MMP9,PCSK2,STAB1,THG1L
NFkB (family)		group		1.244	0.000734	CCL4,CCND1,ESR1,LPL,MMP9,PLAT,RELA,S100A9,SQSTM1	287 (16)
MSC		transcription regulator	Inhibited	-2.121	0.000734	BMP7,CCL28,CCL4,CD79A,DDX60,GPAT3,IFI44,SCEL,SPP1
BCR-ABL1		fusion gene/product		0.224	0.000738	BCL2L11,CCND1,CEBPB,HK1,HMOX1,IL1RAP,MYC,PIM1,PRKCD,RELA,SOCS1	338 (20)
CD28		transmembrane receptor		1.778	0.000738	AHR,CCL4,CCND1,CCND2,CD274,CDK2,CH25H,EGR2,EOMES,FOS,HELLS,IL1RAP,IL27,JUN,LTBP1,MYC,NLGN3,PDE4B,RELA,RHOC,SHH,SLC7A1,SLC7A5,SOCS1,SOCS3,STAT3,TNFRSF1B	331 (18)
HOXA10		transcription regulator		0.258	0.000738	ATP1A2,BCL2L11,CDKN1A,COL3A1,EGR2,ENPP2,GJA1,HMGCR,IGFBP3,KLF10,LTF,PHGDH,PRKCD,RELA,SCD,SCOC,TTC3
FOXP3		transcription regulator		1.97	0.000738	BBC3,BCL2L11,CDKN1A,EGR1,EOMES,FOS,FOSL2,HLA-A,JUN,LGALS3,MMP9,NFIL3,NRN1,NTRK3,RUNX1,TGM2,TNFRSF4	356 (20)
melatonin		chemical - endogenous mammalian		0.79	0.000749	AR,CDKN1A,CYP11A1,ELAVL4,FOS,GJA1,HMOX1,IGFBP3,JUNB,MMP9,Mt1,MYC,PLAT,RELA,SPP1,SQSTM1	421 (22)
MK2206		chemical drug		-0.373	0.00075	BCL2L11,CCND1,CD274,EDIL3,GREB1,MLXIPL,MYC	398 (23)
mir-148		microRNA		-1.207	0.00075	ALCAM,BCL2L11,DNMT3B,EGR1,MMP9,RELA,SOCS1	237 (10)
ALOX15		enzyme		0.273	0.00075	CCL4,FOSL1,HMOX1,JUN,Muc1,NOTCH3,RGS2	337 (20)
IL18		cytokine	Activated	2.271	0.00076	ATF3,BCL6,CCL4,CD83,EDNRB,ENPP2,FOSL2,GADD45B,GADD45G,GJA1,GRIN2A,JUN,LIF,MMP9,NFIL3,RELA,SLC3A2,SPP1	351 (19)
DGCR8		enzyme		0.051	0.000782	CCND1,EGR1,EGR2,FOS,GJA1,MYC,POU3F2,SHH	353 (22)
ABCB4		transporter	Inhibited	-2.443	0.000782	COL1A2,COL4A1,LGALS3,MMP9,NOX4,SERPINE1,SOCS3,SPP1	318 (15)
2,3,4,7,8-pentachlorodibenzofuran		chemical toxicant		-0.707	0.000782	ACOT2,ESR1,FGF9,GADD45A,ITGA7,PRKAR2B,PTGFR,RESP18
FGF7		growth factor		-0.038	0.000799	CCND1,CDK2,CDKN1A,FGF1,MMP9,S100A10,SCD,SDC1,SERPINE1,SHH	356 (21)
FOXA1		transcription regulator		1.234	0.000799	ASTN1,CDKN1A,CFTR,COL18A1,ESR1,GREB1,GRIN3A,HK1,MLXIPL,MYC,PGR,PPP1R14C,RPRM,SHH,TMEM74,TNFRSF12A	425 (24)
cyclooxygenase		group		1.172	0.000799	Chil3/Chil4,FOS,HMOX1,LIF,RGS2	359 (18)
SAV1		other	Inhibited	-2.219	0.000799	CCND1,CDKN1A,COL3A1,COL4A1,SPP1	175 (7)
HGS		other		1.387	0.000799	EGR2,ESR1,FOS,JUN,POU3F2	381 (19)
DUSP5		phosphatase	Inhibited	-2.236	0.000799	CH25H,EGR1,EGR3,FAM83G,SRXN1
prazosin		chemical drug	Inhibited	-2.236	0.000799	DUSP1,EGR1,FOS,MYC,Sik1	389 (22)
IKBKE		kinase		0.999	0.000809	ACOD1,CCND1,HLA-A,IFIT3,MMP9,MYC,PDK4,PGM2,PHGDH,PSAT1,ZC3HAV1	280 (21)
sunitinib		chemical drug		0.41	0.000823	BBC3,BCL2L11,CCND2,CDKN1A,COL4A2,ITGA3,LAMB3,MMP9,RUNX1	262 (20)
BCL3	1.187	transcription regulator		-0.894	0.000823	CCND1,CD274,EGR1,EGR2,FOS,JUN,PDK4,PLAUR,STAP2	336 (19)
CDX1		transcription regulator		-1.761	0.000823	B3GALT5,CCND1,CCND2,CLDN1,CLDN2,HDC,HOXB9,Muc1,RELA	187 (7)
GSTO1		enzyme		1.129	0.000823	CHAC1,LAMA5,MYH9,NECTIN3,NID2,PDE4B,SEMA3A,VSNL1,ZFP36L1
IRF2		transcription regulator		1.342	0.000836	CCND1,CD274,CDK2,CDKN1A,CFTR,Chil3/Chil4,CLDN2,CLIC1,IL27,MYH9,SDC1,SLC7A1,SOCS1,SRXN1	215 (12)
USP28		peptidase		1.987	0.000842	CCND1,CD274,CDKN1A,MYC	356 (19)
quizartinib		chemical drug		0.218	0.000842	CCND2,COCH,GADD45G,SPP1	133 (7)
NELFB		other	Inhibited	-2	0.000842	ATF3,CDKN1A,GADD45A,GADD45B	174 (9)
CIC		transcription regulator			0.000842	CCND1,ETV1,FOSL1,MAFF	130 (7)
PIAS2		transcription regulator			0.000842	AR,CDKN1A,FOS,SLC11A1	453 (25)
RB1CC1		other		-0.025	0.000842	CCND1,CDKN1A,MYC,SERPINE1	388 (24)
DDB2		other			0.000842	BBC3,CDKN1A,MMP9,SEMA3A	388 (21)
putrescine		chemical - endogenous mammalian		1	0.000842	CDK2,CDKN1A,FOS,JUN	365 (23)
trientine		chemical drug		-0.831	0.000842	COL3A1,IGFBP3,SERPINE1,SOD3
androstenediol		chemical - endogenous mammalian			0.000842	AR,CDKN1A,ESR1,RELA	471 (16)
CYP19A1		enzyme		0.863	0.000851	AR,ASPG,CCND1,CLCF1,ESR1,HLA-A,JUN,LPL,PGR,PRLR,S100A10,SLC27A2	352 (23)
GW501516		chemical drug		-0.555	0.000851	CCND1,CDKN1A,IGFBP3,LAMB3,LPL,LTF,PDK4,PLAT,S100A9,SCD,SNCG,Sprr2g	327 (22)
quercetin		chemical drug		1.81	0.000852	AR,CD63,CDKN1A,CRH,CYP11A1,EGR1,ESR1,FOS,FOSB,HMOX1,JUN,KLF10,LPL,MMP9,MYC,PHGDH,PIM1,PLAUR,RFX2,TST	383 (19)
Sos		group			0.000853	APLN,CAST,CRABP2,ELOVL6,FLRT2,FOS,HMOX1,HSPB8,KLF6,MAFK,MYH9,NFIL3,NPTX1,RAPGEF3,RIPK1,RUNX1,SCD,Tpm4	304 (13)
THRA		ligand-dependent nuclear receptor		-0.311	0.000854	BMP4,CCL28,CCND1,CDKN1A,CTSH,FOS,FRZB,HMOX1,JUN,LPL,PCSK2,PGR,RCAN2,SERPINE1,SQSTM1	398 (24)
ROCK1		kinase	Activated	2.421	0.000859	CCND1,CCND2,COL3A1,COL4A2,FBLN2,FBN1	375 (23)
MST1R		kinase	Activated	2.425	0.000859	CCL4,CCND1,FOS,IL27,JUN,MYC	309 (18)
bardoxolone methyl		chemical drug		-0.26	0.000859	CCL4,CCND1,HMOX1,MMP9,MYC,RELA	356 (21)
PGF		growth factor		1.823	0.000875	ATF3,CCL28,CCL4,EGR1,FOSB,MMP9,SERPINE1	379 (24)
FOXP1		transcription regulator		-0.342	0.000875	CD274,CDKN1A,GAP43,JUN,NLGN3,PCDH10,ST8SIA2	308 (12)
laminaran		chemical drug		1.89	0.000875	ACOD1,CCL4,CLDN1,CLEC4E,GPR84,SGPP2,TNFAIP6
PPARA		ligand-dependent nuclear receptor		0.553	0.000887	ACAT2,ACOT2,ANXA2,CCND1,CD63,CDK2,CDKN1A,CEBPB,CYP51A1,CYP7B1,ELOVL6,FDFT1,FOS,GLUL,GRIN2A,HMGCR,HMGCS1,HMOX1,IDI1,IGFBP3,IL1RN,INSIG1,LAMB3,LPL,MGST3,MMP9,MSMO1,MYC,PDK4,S100A9,SCD,SLC27A2,STBD1	327 (20)
MMP1		peptidase		1.771	0.00089	CDK2,CDKN1A,Chil3/Chil4,FOS,JUN,MMP9,MYC,SERPINE1	325 (20)
alitretinoin		chemical drug		-0.252	0.000908	AR,BMP7,CALB1,CCND1,CD83,CDK2,CDKN1A,CYP26A1,DUSP1,ESR1,FOS,HMGCS1,LTF,MMP9,SCD,SPP1	401 (23)
TREX1		enzyme		1.217	0.000913	CAST,CD274,CDKN1A,CLEC4E,CMPK2,DDX60,FXYD7,GSN,IFI44,IFIT3,MVP,Mx2,MYD88,RASSF4,ZC3HAV1	185 (7)
1,25-dihydroxyvitamin D		chemical drug		0.54	0.000921	CCND1,CCND2,EGR1,GLUL,MSTN,MYC,SLC7A5,SOCS1,STAT3	382 (24)
SGK1		kinase		-0.863	0.000921	BCL2L11,CDKN1A,CFTR,GRIN2A,KCNA2,KCNQ2,LIF,SLC3A2,SLC6A8	263 (12)
ATG7		enzyme		-0.222	0.000924	BCL2L11,CCL4,CMPK2,GSTM5,HK1,JUN,MYC,NIBAN2,PRKCD,SOCS3,SQSTM1,SYNPO	344 (19)
HAVCR1		other		-0.266	0.000924	AHR,CEBPB,EGR2,GLI2,JUN,PLAUR,PPP2R2C,SESN2,SOCS3,STAT3,STC2,TSPAN18	240 (15)
ZC3H12A		enzyme		-0.144	0.00094	BCL3,CEBPB,CLCF1,DUSP1,FOS,JUNB,LIF,LPL,MMP9,PPP1R18,RGS2,Rnf125,TES,TNFRSF1B,TNFRSF4,ZFP36L1,ZNF217	327 (18)
ZBTB16		transcription regulator		-1.478	0.000957	BCL6,BMP7,CCND1,CD274,CD83,CD8A,CDKN1A,Cyp4f16/Cyp4f37,EGR2,EMB,GBE1,MMP9,MYC,POLA2,SCD,SHH,SPP1,TNFRSF4,TSC22D3	390 (22)
NANOG		transcription regulator		0.113	0.000966	ACVR1C,AHR,BMP4,BMPR1B,CCND2,COL3A1,EGR1,EOMES,FOS,FOSB,GBX2,GLI2,LTBP1,MYC,NPTX1,OTX1	229 (14)
IRAK4		kinase			0.000976	ATF3,CSRNP1,EGR1,FOS,FOSB,IER2,JUN,LIF,PDE4B,SOCS1	371 (18)
KAT2A		enzyme		1.364	0.000997	ADAMTS1,AKAP12,CCND1,CCND2,EMP1,FGF1,GBX2,HMGA1,JUN,JUNB,OTX1,POU4F3,RCAN2	363 (15)
ROCK		group		1.067	0.00101	CCND1,CDKN1A,COL3A1,FOS,MAFK,MYC,Nes,SPP1	355 (22)
Am 580		chemical reagent	Activated	2.733	0.00101	CYP51A1,DUSP1,FDFT1,HMGCR,HMGCS1,PLAT,SCD,TGM2
ARRB1		transcription regulator			0.00102	EGR1,JUNB,LPL,MYC,SERPINE1,SPP1,TSC22D3	359 (22)
HOXC6		transcription regulator		-0.64	0.00102	ARMH4,BMP7,CNTN1,IGFBP3,PDGFRA,RUNX1,ZBTB7C
BAG1		other		1.664	0.00102	BCL2L11,CCND1,CDKN1A,FOS,GADD45A,JUN,RAB27A	394 (18)
1,2-dimethylhydrazine		chemical toxicant		0.447	0.00102	CCND1,GJA1,MYC,PRSS12,RELA,S100A9,SPP1	367 (12)
DUSP11		phosphatase	Activated	2.213	0.00102	CMPK2,DDX60,GBP6,IFI44,IFIT3
ABT-737		chemical drug	Activated	2.183	0.00102	BCL2L10,BCL2L11,CDKN1A,CEBPB,GADD45A	365 (21)
Collagen type IV		complex		1.342	0.00102	MMP9,MYC,PLAUR,RELA,SERPINE1	399 (23)
HDAC7		transcription regulator		-1.033	0.00102	ALCAM,CCND1,CDKN1A,ETNPPL,RPRM	432 (21)
PPP1R15A		other		-0.849	0.00102	CCND1,CEBPB,DDIT3,GADD45A,SNAP25	182 (9)
YAP/TAZ		group		1.126	0.00102	CD274,GLI2,HSPB1,PSAT1,SLC7A11
vitamin E		chemical drug	Inhibited	-2.377	0.00103	CDKN1A,EGR1,KLF6,LPL,NFIL3,PLAT,PVALB,SERPINE1,SPP1	343 (22)
Go 6976		chemical drug		-1.302	0.00103	CCL4,CCND1,CD83,CDKN1A,FOS,HMOX1,ITGA5,MMP9,TNFRSF4	283 (16)
mir-31		microRNA		0	0.00103	AR,DLX3,ITGA5,RELA,SATB2,SPP1
PTX3		other		-1.59	0.00103	CCL4,EGR2,EGR3,FOS,JUN,MMP9	298 (18)
urethane		chemical toxicant		0.294	0.00103	CCND1,CDKN1A,Chil3/Chil4,HMOX1,MYC,SFRP1	352 (24)
dithiothreitol		chemical reagent		0.762	0.00103	ATF3,CCND1,DDIT3,GADD45A,HMOX1,MYC	367 (22)
carbenoxolone		chemical toxicant		0.97	0.00103	BCL2L11,COL3A1,HMGCR,MMP9,NOX4,SPP1	393 (21)
CYD0618		chemical reagent			0.00104	CCND1,MMP9,MYC	174 (7)
GPIIB-IIIA		complex			0.00104	BCL3,MMP9,PLAUR	295 (16)
Rp-8-pCPT-cGMPS-triethylamine		chemical reagent			0.00104	CDKN1A,S100A10,SOD3
OSU-2S		chemical reagent			0.00104	CDK2,CDKN1A,CEBPB
FKBP8		other			0.00104	MMP9,SDC1,SHH
PRKACB		kinase			0.00104	CRH,MYC,PDE4B	362 (17)
PLSCR1		enzyme			0.00104	CCND1,CDKN1A,MYC	216 (12)
NEK10		kinase			0.00104	BBC3,CDKN1A,GADD45A	252 (7)
mir-548		microRNA			0.00104	AR,CDKN1A,MMP9	221 (7)
DYNLL1		other			0.00104	BCL2L11,CDKN1A,FOS	369 (17)
MAT2A		enzyme			0.00104	FOS,HMOX1,MMP9
TRIM33		transcription regulator			0.00104	MYC,RUNX1,SERPINE1
F2RL3		G-protein coupled receptor			0.00104	CD63,EGR1,FOS	215 (12)
EFEMP2	0.438	other			0.00104	FBLN2,FBLN5,MMP9
STX2		transporter			0.00104	BMP4,CCND1,MYC	344 (16)
BTG1		transcription regulator			0.00104	DDIT3,JUN,TRIB3
RPS20		other			0.00104	BBC3,CDKN1A,MYC	252 (7)
azetidine		chemical reagent			0.00104	BAG3,DDIT3,HSPB8
butylated hydroxytoluene		chemical toxicant			0.00104	FOS,JUN,VIP	136 (7)
PK11007		chemical reagent			0.00104	BBC3,CDKN1A,DDIT3
Z-VEID-FMK		chemical reagent			0.00104	CCND1,CCND2,SPHK1	171 (7)
quisqualic acid		chemical - endogenous non-mammalian			0.00104	EGR1,FOS,JUNB	354 (22)
levonorgestrel		chemical drug			0.00104	ESR1,LIF,PGR	128 (7)
3',4',7-trihydroxyisoflavone		chemical - endogenous non-mammalian			0.00104	CCND1,CDK2,ESR1	430 (26)
CD3		complex	Activated	2.048	0.00105	AHR,BCL2L11,BCL6,CCL4,CCND1,CCND2,CD274,CD83,CD8A,CDK2,CH25H,EDIL3,EGR2,EGR3,EOMES,FOS,GRM1,HELLS,IL1RAP,JAK3,JUN,JUNB,LTBP1,MTHFD2,MYC,NLGN3,OGN,PDE4B,PTP4A1,RHOC,SHH,SLC7A1,SOCS1,SOCS3,SORL1,ST8SIA3,SYNPO,TGM2,THY1,TNFRSF4,ZFP36L1	379 (20)
IHH		enzyme		0	0.00106	BMP4,CCND1,CHST11,DHH,EDIL3,HAPLN1,PDK4,PTGFR,SPATA24,SPP1,Zfp185
heparin		chemical - endogenous mammalian		-1.185	0.00108	CCND1,CD83,CYP11A1,DUSP1,FOS,IGFBP3,LPL,MMP9,PLAT,TNFAIP6	359 (16)
(+)-MK-801		chemical drug		-0.516	0.00108	CCND1,CDKN1A,CRH,EGR1,FOS,FOSB,GJA1,JUN,JUNB,STAT3	411 (24)
fluticasone propionate		chemical drug		1.058	0.00109	CD83,EMP1,FBLN5,GADD45B,GAL,GSTM1,IL1RN,LPL,MMP19,MMP9,PDK4,SERPINE1,SERPINF1,SPP1,TGM2,TSC22D3	254 (12)
GSTP1		enzyme			0.00109	DYNC1I1,ESR1,ETNPPL,FHL5,GRIN2A,HMOX1,JUN,RAB27A,SEMA3D,SERPINE1,SLC7A11,STK40,SULT4A1,TEAD2,TMOD2,TSC22D3	369 (21)
IL12 (family)		group		1.194	0.00111	ATF3,BCL2L11,BCL3,BCL6,CCL4,CD274,CD8A,EGR2,ENPP2,FOSL2,LIF,MYC,NFIL3,PIM1,SH2D1A	375 (16)
NOS2		enzyme		1.518	0.00112	AR,CCL4,CDKN1A,Chil3/Chil4,CLEC4D,COL4A1,COX6A2,GJA1,HMOX1,IFIT3,IL1RN,KLF6,MMP9,RELA,SLFN12L,THY1,TNNT2	411 (25)
FCGR2A		transmembrane receptor		1.51	0.00114	ACOD1,CCL4,CLEC4E,GPR84,IFIT3,MARCKSL1,RASGRP1,SERPINE1	391 (17)
DCN		other		0.784	0.00114	CDKN1A,COL1A2,DUSP1,FBN1,MMP9,SDC1,SEMA3A,SERPINE1	438 (17)
mir-30		microRNA		-1.657	0.00114	AR,BBC3,BCL2L11,CDKN1A,GADD45A,RAB38,SERPINE1,UGT8	385 (18)
BACH1		transcription regulator		-0.989	0.00115	AIFM3,CEBPB,DUSP1,HIF3A,HMOX1,PDK4,SLC7A11,SPP1,SQSTM1	137 (7)
NCOA3		transcription regulator		1.274	0.00116	AHR,CCND1,CDK2,CDKN1A,DDIT3,EOMES,HMOX1,IGFBP3,MMP9,Muc1,PGR	423 (24)
DYSF		other			0.00116	ANXA2,CD68,CD83,CTSH,ELOVL6,GPAT3,HLA-A,HSPB1,LGALS3,PDGFRA,SCD
2-deoxyglucose		chemical drug		1.094	0.00116	BCL2L11,CCND1,CDKN1A,CRH,DDIT3,EOMES,FOS,IFIT3,JUN,MYC,SPP1	385 (25)
ARHGAP21		other		-0.378	0.00117	ARID5A,HDC,IFIT3,Mx2,PLA1A,PLAT,SLFN12L
KDM4D		enzyme		0.795	0.00118	CCND1,CD274,CDKN1A,GLI2
Ppp2c		group		-0.152	0.00118	CDKN1A,DUSP1,EIF4EBP1,PIM1	372 (22)
BCAR1		enzyme			0.00118	CCND1,CDKN1A,EGR1,ESR1	407 (21)
RPS6KA4		kinase		1.992	0.00118	DUSP1,FOS,JUN,JUNB	371 (20)
pectin		chemical drug		-1.963	0.00118	CD68,COL3A1,LGALS3,SPP1
N-[(2Z)-3-(4,5-dihydro-1,3-thiazol-2-yl)-1,3-thiazolidin-2-yl idene]-5H dibenzo[a,d][7]annulen-5-amine		chemical reagent		0.6	0.00118	CEBPB,FOS,MMP9,MTHFD2,MYC,RHOC,SERPINE1,SNCG,SPP1,VIP	248 (9)
MBD3		other			0.00118	CCND1,CCND2,FOSL1,Mt1,MYC,NKD1,PPP2R2C,SCD,SFRP1,WNT10A	303 (16)
SCH 58261		chemical reagent		-1.016	0.00123	EGR1,EGR2,FOS,JUNB,LILRB3,TRPC1	398 (20)
PTH1R		G-protein coupled receptor			0.00123	AR,CALB1,CCND1,DUSP1,GLI2,SPP1	263 (17)
carvedilol		chemical drug		-0.946	0.00123	COL3A1,GAP43,HMOX1,MMP9,MYC,RELA	436 (22)
SERPINE1	0.935	other		1.99	0.00126	BCL6,CDKN1A,DUSP1,EGR1,FBLN2,FOS,GAP43,JUNB,MVP,PLAUR,PRLR	369 (21)
POU2F2		transcription regulator		1.093	0.00126	BBC3,BCL6,COCH,EBF1,JUN,MYC,SCD,SPP1,STAT3,TNFRSF12A,VIP	28 (3)
flutamide		chemical drug		-0.801	0.00126	AR,COL3A1,CRH,CYP11A1,DHH,ESR1,FOS,GSTM1,INSL3,KITLG,TUBB3	443 (24)
IL12 (complex)		complex	Activated	3.873	0.00126	AHR,BCL3,CCL4,CD63,EOMES,FOS,GADD45B,GADD45G,GJA1,IL27,JUN,MMP9,MYC,MYD88,PIM1,SH2D1A,SOCS1,SOCS3	277 (15)
MAPK8IP1		other		-0.404	0.00127	CCND1,EOMES,FOS,GRIN2A,JUN	420 (21)
MAP3K5		kinase		1.931	0.00127	BCL2L11,CCND1,CDKN1A,HMOX1,JUN	369 (18)
GADD45A	0.491	other		-0.391	0.00127	CDKN1A,FOSB,JUN,MMP9,PIK3CD	426 (21)
PTPN3		phosphatase		0.794	0.00127	CDKN1A,MMP9,MYC,SERPINE1,TGM2	366 (20)
GLP-1-(7-34)-amide		biologic drug		1.412	0.00127	CEBPB,FOS,HMOX1,LPL,STAT3	367 (23)
platelet activating factor		chemical - endogenous mammalian		1.736	0.00129	CDKN1A,EGR1,EGR2,FOS,MMP9,PLAUR,SERPINE1,SOCS3	320 (21)
ITGAV		transmembrane receptor		1.842	0.00129	CCL4,CDKN1A,COL1A2,FOS,HLA-A,ITGA5,MMP9,SERPINE1	354 (21)
CBL		transcription regulator	Inhibited	-2.401	0.00129	BCL2L11,CDKN1A,CFTR,DDIT3,FOS,HMOX1,PDGFRA,SQSTM1	369 (21)
Y 27632		chemical drug		-0.964	0.0013	BBC3,BMP4,CDKN1A,CEBPB,FOS,MMP9,MYC,RELA,SERPINE1,TAGLN2	347 (19)
STAT4		transcription regulator	Activated	2.883	0.00131	ACVRL1,BCL2L11,BCL3,CAPN5,CDK2,GADD45G,GBE1,GJA1,INSL3,ITGA7,Mt1,MYC,POLD4,SERPINE1,SOCS3,STC2,STK32C,TUBB2B,UNC13D	331 (21)
ETV6-RUNX1		fusion gene/product		-0.735	0.00134	BCL3,CALN1,CD79A,CD83,CLIC1,EMP3,GREB1,IFIT3,JAK3,KLF6,LAT2,MMP9,Mx2,MYC,PCDH18,PDE4B,PIM1,PRMT2,RASGRP2,SEMA6A,SIPA1,SPP1,STAT3,TSC22D3	113 (4)
thymoquinone		chemical drug		1.491	0.00135	AR,BCL2L10,CDK2,CDKN1A,COL3A1,HMOX1,MMP9	359 (22)
TXNRD1		enzyme		-1.912	0.00135	GPX3,GSTM1,GSTM5,HMOX1,MGST3,SCD,SRXN1	254 (7)
GBX2	1.553	transcription regulator			0.00135	EGR2,ELMO1,ENPP2,FGF12,IL1RAP,PAX2,SYT2
6-hydroxydopamine		chemical toxicant		0.61	0.00137	BBC3,CRH,DDIT3,FOS,FOSB,GADD45G,GAP43,GNAL,JUN,MMP9,TRIB3	307 (20)
MYCN		transcription regulator		-1.713	0.00137	ADAMTS1,CCND1,CCND2,CDKN1A,COL18A1,COL4A1,EMP1,FBN1,GBX2,HLA-A,HMGA1,IGFBP7,ITGA3,JUNB,LRRN1,MRC2,MYH9,OTX1,PHGDH,POU4F3,RCAN2,S100A10,SERPINE1,TGM2,ZYX	368 (21)
laquinimod		chemical drug		1.673	0.00138	AMZ1,GPNMB,HDC,HIC1,INHBB,LAD1,OLFML2A,Pdzph1,SLC27A2,SLC7A11,SLFN12L,STBD1
4-phenylbutyric acid		chemical - endogenous mammalian		-0.047	0.00138	CCND1,CDKN1A,DDIT3,GJA1,GSN,HLA-A,LGI1,MMP9,NUPR1,RELA,SOCS3,TRIB3	385 (26)
APC		enzyme	Inhibited	-2.02	0.00139	CCND1,CCND2,CD274,CDKN1A,CLDN1,GLI2,GLUL,HEY1,Ifitm1,JUN,LPL,MMP9,MYC,PDK4,SPP1,TNFRSF12A	399 (23)
SN-011		chemical reagent		0.333	0.00141	CD274,CDKN1A,CLEC4E,DDX60,IFI44,IFIT3,MYD88,RASSF4,ZC3HAV1
FASN		enzyme	Inhibited	-2.178	0.00141	DDIT3,DHCR24,EDNRB,ELOVL6,FGF1,LPL,PRKAR2B,RELA,SCD	357 (24)
ITGB3		transmembrane receptor		0.553	0.00141	CD274,COL1A2,FOS,ITGA3,ITGA5,MMP9,PLAUR,RUNX1,SERPINE1	325 (19)
JUND		transcription regulator		1.091	0.00143	BCL3,CCND1,FOSL1,HMOX1,MMP9,NOX4,PLAUR,SDC1,SOCS1,SPP1	377 (20)
fluoxetine		chemical drug		0.566	0.00143	CRH,EGR1,FOS,FOSB,GNAI1,HTR1A,MYC,PDE4B,S100A10,VGF	408 (23)
SMARCA5		transcription regulator		-0.301	0.00144	AHR,BCL6,CCND2,CDKN1A,GBP6,HLA-A,IFITM2,OSGIN1,PHLDA3,PLXND1,SLC27A2,TUBB3,ZNF442	178 (7)
tetrabromobisphenol A		chemical toxicant	Activated	2.828	0.00145	BMP7,CEBPB,COL1A2,COL3A1,ITGA3,JUN,LTBP1,MYC	370 (23)
luteolin		chemical drug		-0.651	0.00145	AR,CCND1,FOS,HMOX1,IL27,JUN,MMP9,MYC	363 (21)
MEF2		group		0	0.00145	ADCYAP1,IL1RN,JUN,LDHB,PCDH10,RGS2
TAB1		enzyme		0.896	0.00145	CDKN1A,CH25H,JUN,RELA,RGS2,SERPINE1	387 (22)
rosuvastatin		chemical drug		-1.633	0.00145	CYP51A1,FDFT1,HMGCR,HMGCS1,HMOX1,IDI1
vitamin K3		chemical drug	Activated	2.384	0.00145	DDIT3,EGR1,FOS,HMOX1,KLF6,MYC	336 (18)
2-methylthio-ATP		chemical reagent			0.00148	FOS,SERPINE1	246 (14)
CG Beta		group			0.00148	ADCYAP1,PGR	178 (7)
1alpha,20-dihydroxyvitamin D3		chemical - endogenous mammalian			0.00148	COL1A2,COL3A1
(20S,23)-dihydroxyvitamin D3		chemical - endogenous mammalian			0.00148	COL1A2,COL3A1
1R,20,23-trihydroxyvitamin D3		chemical - endogenous mammalian			0.00148	COL1A2,COL3A1
20S-hydroxyvitamin-d3		chemical - endogenous mammalian			0.00148	COL1A2,COL3A1
lonaprisan		chemical drug			0.00148	CCND1,MYC	370 (13)
MSK1/2		group			0.00148	DUSP1,FOS	254 (7)
FBXO25		enzyme			0.00148	EGR1,FOS	168 (7)
GJA3		transporter			0.00148	GJA1,GJA8
RPRD1B		other			0.00148	CCND1,MYC	357 (18)
CCDC88C		other			0.00148	CCND1,MYC	322 (11)
OSI-027		chemical drug			0.00148	BBC3,CCND1	90 (3)
FUBP3		transcription regulator			0.00148	FGF9,MYC
BEST4		other			0.00148	CCND1,MYC	280 (11)
CTNNβ-LEF1		complex			0.00148	CCND1,MYC
OMG	-0.517	G-protein coupled receptor			0.00148	FOS,MYC
ASNS		enzyme			0.00148	MYC,SLC7A5
miR-509-3p (miRNAs w/seed GAUUGGU)		mature microRNA			0.00148	AR,NTRK3
mir-331		microRNA			0.00148	MYC,PLAUR
CCT5		other			0.00148	BBC3,CDKN1A
POU4F3	-0.93	transcription regulator			0.00148	FOS,POU4F2
ING2		transcription regulator			0.00148	SERPINE1,SPP1	260 (7)
BOC		other			0.00148	ISL2,SHH
ING5		other			0.00148	CDK2,CDKN1A
PDHA1		enzyme			0.00148	CCND1,MYC	147 (7)
CRTAP		other			0.00148	CDKN1A,SERPINE1	199 (8)
RNF11		enzyme			0.00148	MMP9,SERPINE1	189 (7)
HUS1		kinase			0.00148	BBC3,BCL2L11	251 (7)
nexrutine		chemical drug			0.00148	RELA,STAT3
ZFYVE16		other			0.00148	CDKN1A,SERPINE1	368 (14)
MLS000389544		chemical reagent			0.00148	PCK2,PDK4
amsacrine		chemical drug			0.00148	JUN,MMP9
(S)-flurbiprofen		chemical drug			0.00148	CCND1,JUNB
chlordiazepoxide		chemical drug			0.00148	FOS,TRHR
SC144		chemical reagent			0.00148	ENPP2,STAT3
EWSR1-WT1		fusion gene/product			0.00148	EGR1,SLC29A4
NVP-BHG712		chemical drug			0.00148	AR,MYC
L-canavanine		chemical - endogenous non-mammalian			0.00148	BAG3,HSPB8
clofibrate		chemical drug		1.994	0.00149	ACOT2,BMP7,CCND1,CCND2,GADD45A,HMGCR,HMOX1,IL1RN,Mt1,MYC,SCD	321 (21)
cocaine		chemical drug	Activated	2.934	0.00149	DNMT3B,DUSP1,EGR1,EGR2,FOS,FOSB,FOSL1,GABRG2,GADD45A,GADD45B,GRM1,INA,JUN,JUNB,MIDN,PVALB,Sik1	400 (24)
arsenic trioxide		chemical drug		1.787	0.00149	ACAT2,ATP1A2,ATP1B1,BBC3,CCND1,CDKN1A,CYP26A1,CYP51A1,DDIT3,DHCR24,FDFT1,GLI2,HMGCR,HMGCS1,HMOX1,IDI1,MMP9,MSMO1,MYC,PIM1,RELA,SCD,SHMT2,SLC7A11,STAT3	396 (22)
EGLN		group	Inhibited	-2.125	0.00153	A2M,ADM2,APLN,CCL28,EIF4EBP1,FOSL2,GREM2,PPP2R5B,PRSS56,RAB20,S100A9,Serpina3g (includes others),SERPINE1,STC2,TNFAIP6	150 (5)
ZNF106		other	Inhibited	-2.646	0.00155	C4A/C4B,GPNMB,HSPB1,LGALS3,SLC11A1,TNFRSF12A,UGT8
MAZ		transcription regulator		0.747	0.00155	ATF3,CCL28,CDKN1A,IL1RN,MMP9,MYC,STAT3	361 (16)
SOX10		transcription regulator		0.896	0.00155	CD274,CDKN1A,CHRNB4,DHH,EDNRB,FOS,SOD3
IFI16		transcription regulator		1.356	0.00156	CCL4,CCND1,CDKN1A,ESR1,GADD45A,IL1RN,LPL,MTHFD2,MYC,PIM1	382 (18)
gemcitabine		chemical drug		0.159	0.00156	CCND1,CD274,CDKN1A,EGR1,FOSL1,HMOX1,MDK,MMP9,MYC,RIPK1	390 (23)
silibinin		chemical drug		-0.635	0.00156	BBC3,CCND1,CDK2,CDKN1A,EGR1,IGFBP3,MMP9,MYC,PLAUR	424 (23)
NADPH oxidase		complex		1.172	0.00158	FOS,HMOX1,JUN,MMP9,SERPINE1	367 (20)
HMGXB4		other		1.342	0.00158	CD274,IL27,KLF6,PIM1,TGM2
GDF15		growth factor			0.00158	CCND1,CDKN1A,LTBP1,PLAUR,SERPINE1	409 (22)
SLC2A1		transporter		-1.091	0.00158	ALDH1L2,DDIT3,HMOX1,SERPINE1,SLC7A11	431 (25)
TWNK		enzyme	Inhibited	-2.236	0.00158	ATF3,ATF5,DDIT3,SQSTM1,TRIB3
PDGFC		growth factor	Activated	2.225	0.00158	CCND1,COL1A2,COL4A2,MYC,PDGFRA	396 (24)
Sch-23390		chemical drug			0.00158	EGR1,EGR2,FOS,FOSB,FOSL1	282 (18)
desipramine		chemical drug		-0.392	0.00158	CDKN1A,FOS,HMOX1,Nes,PDE4B	367 (21)
4-nonylphenol		chemical toxicant			0.0016	AR,FOS,LPL,MYC	388 (17)
Ptprd		phosphatase	Inhibited	-2	0.0016	A2M,CDKN1A,GADD45G,MYC	174 (7)
Collagen Alpha1		group		0.975	0.0016	CDKN1A,IL1RN,MMP9,PLAUR	342 (19)
DNAJC3		other			0.0016	CALB2,DDIT3,NEFL,SNCG
NDUFA13		enzyme			0.0016	A2M,CCND1,CTTN,MMP9	325 (12)
CBX2		transcription regulator			0.0016	AHR,CCND2,CDKN1A,RUNX1
MGAT3		enzyme		0.849	0.0016	HEY1,ITGA3,ITGA5,NOTCH3	244 (12)
IQGAP2		other		-1.067	0.0016	CCND1,FOSL1,NKD1,SFRP1	269 (7)
HOXA4		transcription regulator		-1.029	0.0016	CCND1,CCND2,MYC,TAGLN2	191 (7)
cytochalasin B		chemical toxicant		0.343	0.0016	CD63,CDKN1A,MMP9,TAGLN2	326 (21)
salmeterol		chemical drug		0.849	0.0016	CFTR,DUSP1,RGS2,SOCS3	337 (14)
pyrimidin-2-one beta-ribofuranoside		chemical reagent			0.0016	BMP4,CDK2,CDKN1A,SQSTM1	370 (12)
CD3E		transmembrane receptor		1.724	0.00162	CCND2,CDK2,CDT1,FOS,JUN,MMP9,MYC,PIK3CD,SOCS1,SPHK1,TNFRSF1B	386 (21)
MAP2K4		kinase	Activated	2.53	0.00163	ATF3,CCND1,CDKN1A,FLNA,FOS,GADD45A,JUN,STAT3	311 (17)
EBI3		cytokine		0.923	0.00163	CCND2,CD274,EOMES,FOS,GADD45G,HLA-A,MYC,PIM1	245 (17)
GAST		other		0.677	0.00171	CCND1,EGR1,FOS,GLI2,HDC,JUN,MMP9,RELA,SHH,STAT3	371 (21)
LYN		kinase	Inhibited	-2.425	0.00171	BCL2L11,BCL3,CCL4,CDKN1A,EGR1,MYC,SOCS1,SOCS3,SPHK1,STAT3	300 (19)
lithium		chemical drug		1.195	0.00171	CDKN1A,CRH,DPP10,EGR1,FOS,GNAI1,IL27,JUN,MMP9,NPTX1	413 (24)
FGFR4		kinase			0.00171	CCND1,CDKN1A,FOS,LPL,MLXIPL,SERPINE1	347 (25)
EZR	0.415	other		-0.717	0.00171	ATF3,DDIT3,EIF4EBP1,MMP9,MYC,TRIB3	375 (20)
TBXT		transcription regulator		-0.816	0.00171	ALCAM,DUSP8,FMOD,HAPLN1,ITGA3,SHH
bardoxolone		chemical drug		1.633	0.00171	CCND1,CDKN1A,CEBPB,DDIT3,HMOX1,SQSTM1	394 (23)
cyclophosphamide		chemical drug		1.365	0.00175	ATF3,C4A/C4B,CACNG5,FOS,GAP43,KITLG,LGALS3,MYC,PLA1A,SPP1,TNFRSF12A	375 (18)
CDK2	0.4	kinase		1.016	0.00176	BCL2L11,CDKN1A,FOS,MYC,PGR,RAB27A,SNAP25	364 (22)
4-methylnitrosoamino-1-(3-pyridinyl)-1-butanone		chemical toxicant	Activated	2.417	0.00176	CDKN1A,FOS,GBX2,JUN,JUNB,RELA,SPP1	316 (20)
ciprofibrate		chemical drug		1.521	0.00176	ACOT2,ADAMTS1,ANXA2,CCND2,CD63,COL4A2,CYP26A1,CYP7B1,IL1RAP,LPL,PDK4,SCD,SQSTM1,TAGLN2	364 (21)
GSK3B		kinase		-0.021	0.00177	AR,CCND1,CDKN1A,DDIT3,ESR1,FOS,GFPT2,MMP9,MYC,SERPINE1,SPP1,SQSTM1,TUBB4A	412 (24)
OSMI-1		chemical reagent			0.00177	CCND1,CDKN1A,SQSTM1	354 (19)
histidinol		chemical - endogenous mammalian			0.00177	EGR1,SLC7A1,SLC7A5
flavokawain B		chemical - endogenous non-mammalian			0.00177	AR,BBC3,BCL2L11	158 (7)
PRMT7		enzyme			0.00177	BCL6,CDKN1A,GADD45B	121 (6)
GNE		kinase			0.00177	CHAC1,DDIT3,TRIB3
DAB2		other			0.00177	CCND1,FOS,HMGCR	384 (23)
PHIP		other			0.00177	CCND1,CCND2,ZYX	158 (7)
PDE3A		enzyme			0.00177	CCND1,CDKN1A,DUSP1	406 (23)
TDO2		enzyme			0.00177	AHR,SLC1A4,SLC7A11
TDG		enzyme			0.00177	CRABP2,MYC,PGR	141 (7)
MAP1LC3B		other			0.00177	DDIT3,RELA,SQSTM1
H4C3		other			0.00177	FOSB,Nes,PGR
volinanserin		chemical drug			0.00177	EGR1,FOS,GRM1	199 (7)
manidipine		chemical drug			0.00177	FOS,HMGCR,JUN	263 (12)
L-cystine		chemical - endogenous mammalian			0.00177	DDIT3,SLC7A11,TRIB3
Muscarinic cholinergic receptor		group			0.00177	FOS,JUN,RGS2	335 (19)
androstenedione		chemical - endogenous mammalian			0.00177	AR,CDK2,CYP11A1	299 (11)
NOTCH1		transcription regulator		-0.58	0.00179	BCL6,CCND1,CCND2,CD68,CDK2,CDKN1A,CEBPB,COL1A2,FOS,FOSB,FOSL1,GLI2,HEY1,HMOX1,IGFBP3,MYC,NOTCH3,PRAG1,RELA,SERPINE1,SOCS1,SPP1	343 (19)
methotrexate		chemical drug		-0.576	0.0018	CCL4,CCND1,CDKN1A,CLDN2,COL4A1,DUSP1,GAP43,GSN,HMGCS1,HMOX1,IGFBP3,LPL,Mt1,MYC,NR1H4,SCD,SLC27A2,SOCS3,SPP1,ZFP36L1	342 (20)
Tcf7		transcription regulator		-1.646	0.00182	AR,CCL4,CD79A,CD83,CDKN1A,CTTN,DHCR24,EGR2,EGR3,ENPP2,EOMES,FOSB,FOSL1,KCNJ3,KLF6,MMP9,MSMO1,MYD88,NRN1,NUPR1,P2RY1,RBPMS,SDC1,SH3BGRL2,SOCS3	289 (7)
NFATC1		transcription regulator	Activated	2.182	0.00186	AHR,ATF3,BMP7,CCND1,CCND2,EGR3,HMOX1,MYC,NOX4,PLS3,PRLR,SPP1	357 (21)
CD40		transmembrane receptor	Activated	2.187	0.00187	BCL2L11,BCL6,CCL4,CCND1,CCND2,CD83,CD8A,CDKN1A,DUSP1,FOS,HK1,IL1RN,IL27,JUN,LGALS3,LTBR,MAP3K6,MMP9,MYC,NEFH,Nefm,PIM1,RELA,SERPINE1	312 (17)
GCG		other		1.537	0.00189	BMP4,CEBPB,ELMO1,ETNPPL,FOS,FOSL2,GREM2,HK1,HMGCR,LMNA,PTPRN,Sik1,TNFAIP6	412 (24)
LCK		kinase		1.065	0.0019	EGR1,FOS,GADD45B,JUN,MMP9,MYC,PIK3CD,PRKCQ,RUNX1	319 (22)
alvespimycin		chemical drug		1.069	0.00193	CCND1,ESR1,FDFT1,HMGCR,SCD	279 (7)
trastuzumab		biologic drug		-0.73	0.00193	ANXA2,CCND1,CDKN1A,CEBPB,MYC	367 (23)
EIF2A		translation regulator			0.00193	ATF5,DDIT3,EGR2,JUN,PCK2	125 (6)
FOXF1		transcription regulator		1.231	0.00193	CCND1,CDK2,CDKN1A,ITGA5,PDGFRA
NTRK1		kinase		0.882	0.00193	CDKN1A,EGR1,FOS,GADD45A,MMP9	394 (20)
IGF2BP1		translation regulator		-0.747	0.00199	CDKN1A,COL1A2,COL6A3,DDIT3,GADD45A,MYC	279 (12)
TERC		other			0.00199	CDKN1A,EGR1,HMGCR,NUPR1,PANX2,S100A9	223 (7)
ING1		transcription regulator		-1.293	0.00199	CDKN1A,CTTN,SHH,SPP1,STMN4,TPPP	180 (11)
PRLR	-1.499	transmembrane receptor		0.826	0.00199	A2M,CDKN1A,ESR1,MYC,PIM1,Serpina3g (includes others)	294 (19)
PAK1		kinase		0.708	0.00199	CCND1,CDKN1A,FOSL1,MMP9,MYC,PGR	335 (23)
green tea polyphenol		chemical drug	Activated	2.236	0.00199	CDKN1A,FOS,HMOX1,IGFBP3,JUN,MMP9	351 (22)
verteporfin		chemical drug	Inhibited	-2.449	0.00199	CDKN1A,CLDN1,COL3A1,COL4A1,GADD45A,IGFBP3	165 (7)
betulinic acid		chemical drug		-0.243	0.00199	AR,CCND1,MMP9,NOX4,PTPN6,RELA	378 (21)
CTCF		transcription regulator		0.126	0.002	CD274,CD68,CD83,CDKN1A,EGR1,GBX2,MDK,MYC,NEFH,PBXIP1,RIN1,SLC7A11,TNFRSF12A,TUBA4A	398 (21)
tanshinone II		chemical - endogenous non-mammalian		1.139	0.00201	AR,ATF3,CD68,CDK2,FOS,HMOX1,MMP9	372 (24)
parthenolide		chemical drug		0.397	0.00201	DDIT3,HMOX1,LIF,MMP9,NKD1,PDK4,RELA	341 (17)
S-nitroso-N-acetyl-DL-penicillamine		chemical reagent		1.548	0.00203	CDKN1A,DDIT3,HMOX1,MARCKSL1,MYC,S100A10,SPP1,SUMO2	371 (19)
deoxycholate		chemical - endogenous mammalian	Activated	2.053	0.00203	CCND1,DDIT3,EGR1,GJA1,GLUL,KCNJ3,PLAUR,RELA	342 (18)
panobinostat		chemical drug		0.419	0.00203	BBC3,BCL2L11,CCND2,CDKN1A,FLNA,MYC,RASGRP2,SERPINE1	321 (22)
IL9		cytokine		1.38	0.00203	BCL3,CTTN,JUNB,LTBP1,MYC,PIM1,PLS3,S100A10	421 (19)
thioctic acid		chemical drug		1.286	0.00203	FOS,HMOX1,JUN,LPL,MMP9,MYC,PDK4,SLC7A11	353 (21)
IRF5		transcription regulator		-0.426	0.00203	CCL4,CDKN1A,CMPK2,COL3A1,COL4A1,IFI44,IFIT3,MYC,RELA,RIPK1	361 (19)
THPO		cytokine	Activated	2.442	0.00205	CCND1,CCND2,CMPK2,CTTN,DDX60,FOS,MYC,PGR,PIM1,RUNX1,SOCS3	245 (20)
cetuximab		biologic drug		-0.254	0.00212	BBC3,HSPB1,PLAUR,STAT3	364 (10)
SNORD22		other			0.00212	CCND1,CCND2,CDK2,MYC	159 (7)
48s		complex		1.982	0.00212	ATF5,CCND1,DDIT3,MYC
ZBTB33		transcription regulator		0	0.00212	BBC3,BCL6,CDKN1A,MYC
CAPN3		peptidase	Activated	2	0.00212	DUSP1,GPX3,HMOX1,NOX4
GTF2I		transcription regulator		1.029	0.00212	CCND1,CDKN1A,FOS,MYC	369 (16)
UBR5		enzyme		-1.98	0.00212	BBC3,CCND1,CDKN1A,GREB1	275 (10)
CYP1B1		enzyme		1.155	0.00214	BMP7,CACHD1,CCND1,CLDN1,CYP26A1,DSP,HMOX1,LDHB,LMO1,MICAL1,Mt1,ST3GAL4	276 (7)
metribolone		chemical reagent		-0.195	0.00217	ADAMTS1,AKAP12,AR,ATP1B1,BMPR1B,CAPN5,CCND1,CDKN1A,DHCR24,EGR1,ETV1,EZR,FDFT1,FOS,GADD45G,GREB1,HK1,HMGCR,HMGCS1,IDI1,IFITM2,INSIG1,MGST3,MYC,PAX2,PGM2,PRKCD,RAB27A,SCD,SLC1A4,SOCS1,ZBTB10	438 (25)
Hsp90		group		0.8	0.00221	AHR,AR,BAG3,BCL6,CCND2,CDK2,COL3A1,ESR1,GJA1,MYC	384 (20)
AREG		growth factor		1.839	0.00221	CCND1,EGR1,FOS,IFIT3,JUN,KIF14,MMP9,RUNX1,TMC6,TNFAIP6	400 (21)
CSF		group	Activated	2.121	0.00226	CCL4,CD274,GPR84,IL1RN,SERPINE1,SOCS3,TGM2,TNFAIP6
LATS2		kinase		-0.707	0.00226	BBC3,CDKN1A,DHH,LTF,Nes,PGR,PRLR,SPP1	264 (7)
clozapine		chemical drug		-0.42	0.00226	ACAT2,EGR1,FOS,HMGCR,HMGCS1,PRKAR2B,PVALB,SCD	407 (21)
Hsp27		group		-0.059	0.00227	CCND1,CD274,CDKN1A,EIF4EBP1,FOS,NOX4,STAT3	409 (21)
BCAP31		transporter		0.33	0.00227	CEBPB,CFTR,Chil3/Chil4,DDIT3,EGR2,INSIG1,SCD	232 (12)
mir-19		microRNA		-0.219	0.00227	BCL2L11,CCND2,CDKN1A,ESR1,MSMO1,RAPGEF4,SOCS3	309 (13)
acetovanillone		chemical drug		-1.915	0.00227	CCND2,DUSP1,HMOX1,MMP9,OSGIN1,PVALB,SERPINE1	327 (20)
1,4-bis[2-(3,5-dichloropyridyloxy)]benzene		chemical toxicant		1.409	0.0023	CCND1,CDK2,CDKN1A,CYP39A1,CYP7B1,EIF4EBP1,GADD45B,INSIG1,MAFF,Mt1,SCD,TUBA4A	343 (12)
GHRL		growth factor		0.824	0.0023	CYP11A1,DDIT3,FOS,LPL,PCSK2,RAPGEF3,SCD,SOCS3,SPP1	342 (24)
MDK	0.519	growth factor	Activated	2.401	0.00232	FOSL1,LIF,PLAT,RELA,S100A9,SPP1	350 (19)
miR-221-3p (and other miRNAs w/seed GCUACAU)		mature microRNA		-0.867	0.00232	BBC3,BCL2L11,ESR1,FOS,SH3BP2,TUBB3	269 (7)
GSR		enzyme		-1.633	0.00232	GSTM1,GSTM5,HMOX1,MGST3,SCD,SRXN1
MYL2		other			0.00232	ANXA2,FLNC,HK1,LMNA,Tpm4,XIRP2
FKBP5		enzyme		-1.633	0.00232	CCND1,CDKN1A,CRABP2,LPL,MYC,PDK4	400 (22)
NCOR-LXR-Oxysterol-RXR-9 cis RA		complex		0.447	0.00234	CYP51A1,FDFT1,LPL,MLXIPL,SCD
STAT1/3/5 dimer		complex		1.387	0.00234	BCL3,FOS,JUNB,SOCS3,VIP
POLR2M		other	Inhibited	-2.213	0.00234	ADGRG1,CCND1,CDKN1A,PHLDA3,SESN2
UBE3A		enzyme		0.468	0.00234	AR,CDKN1A,ESR1,PGR,SERPINE1	429 (27)
PD184352		chemical drug		-1.179	0.00234	BCL2L11,CCND1,EGR1,ESR1,FOS	337 (19)
ketamine		chemical drug			0.00234	FOS,HK1,HMOX1,KLF6,PVALB	382 (19)
UCN-01		chemical drug		-0.701	0.00234	BCL2L11,CCND1,CDK2,CDKN1A,PRKCQ	376 (22)
ADIPOQ		other		0.467	0.00237	BCL3,CCND1,CDKN1A,CEBPB,Chil3/Chil4,COL3A1,CRH,CYP11A1,DUSP1,EGR1,FOS,HMOX1,LPL,MLXIPL,MMP9,NOX4,SCD,SLC27A2,SOCS3,STAT3	364 (23)
miR-17-5p (and other miRNAs w/seed AAAGUGC)		mature microRNA	Inhibited	-2.357	0.00239	BCL2L11,CCND1,CCND2,CD274,CDK2,CDKN1A,EGR2,ESR1,RHOC,RUNX1,STAT3	345 (15)
spironolactone		chemical drug		-0.913	0.00239	BMP4,CDKN1A,CEBPB,COL1A2,COL3A1,DUSP1,EDNRB,LGALS3,MLXIPL,SCD,TSC22D3	434 (20)
WBP2		transcription regulator		1.268	0.00247	ALOXE3,BMP4,CDK15,COL4A1,COL4A6,COL6A3,EGR1,ESR1,JUN,MED19,SLC27A2,SLC7A11,WLS	168 (7)
L-methionine		chemical - endogenous mammalian	Inhibited	-2.4	0.00251	ATF5,DDIT3,GADD45B,PCK2,PLAT,SLC7A11,SPP1,TRIB3	378 (18)
PTGES		enzyme		-0.422	0.00251	ANXA2,CDKN1A,EGR1,EZR,MMP9,MYC,NOX4,SERPINE1	382 (21)
Smad2/3		group		-0.254	0.00252	ACVR1C,CD274,CDKN1A,DLX3,EOMES,MMP9,RUNX1,SERPINE1,TGM2	237 (9)
ID1		transcription regulator		1.166	0.00252	CCND1,CDKN1A,EGR1,FAM110D,IGFBP3,MMP9,MYC,SCD,SHH	357 (21)
TBX2		transcription regulator		-1.726	0.00252	ATF3,ATF5,CDKN1A,CDT1,DDIT3,HELLS,HEY1,NFIL3,TRIB3	216 (7)
LGR4		transmembrane receptor		-0.97	0.00256	AHR,CYP11A1,ESR1,GLUL,MMP9,MYC,PRLR	300 (20)
SETDB1		enzyme			0.00256	CNTN4,GRIN2A,HMOX1,IFI44,KCND2,ROBO2,STAT3
CDX2		transcription regulator		1.301	0.00259	B3GALT5,CDKN1A,CLDN1,CLDN2,CYP26A1,EZR,FGF1,GLI2,HOXB9,JUN,Muc1,MYC,NR1H4,RELA,SYNPO	303 (23)
RNASEL		enzyme		0.447	0.00268	CDKN1A,DDIT3,MT-ATP6,PCDH7,PCDH9,STAT3	170 (7)
deferasirox		chemical drug	Activated	2.401	0.00268	ADGRG1,ANXA2,CD300A,FOS,JUN,PLCB1
PLP1		other			0.00268	ATF3,DDIT3,ENPP2,NOTCH3,PRKCQ,SHH	308 (11)
miR-338-3p (miRNAs w/seed CCAGCAU)		mature microRNA	Inhibited	-2.377	0.00268	CCND1,COL1A2,COL4A1,COL4A2,COL4A5,NID2
ELF4		transcription regulator		0.816	0.00268	CDKN1A,DLX3,DUSP1,HDC,MAPKAPK3,SPP1
histone deacetylase inhibitor		chemical drug		1.715	0.00268	BCL2L11,CDKN1A,ESR1,GSN,IGFBP3,MYC	394 (20)
epoprostenol		chemical - endogenous mammalian		1.165	0.00274	EGR1,FOS,SERPINE1,SPP1	391 (22)
cyclic GMP		chemical - endogenous mammalian		1.103	0.00274	CDKN1A,FOS,MARCKSL1,SERPINE1	317 (23)
MAPK8IP3		other			0.00274	JUN,MAPK10,OTX1,PAX2
PURA		transcription regulator			0.00274	AR,CDKN1A,MYC,NEFH	215 (7)
CGB3 (includes others)		other		0.762	0.00274	CYP11A1,IL27,RUNX1,TNFAIP6
H1-2		other		-0.119	0.00274	CCND1,DDIT3,GADD45A,MYC	283 (10)
ATG16L1		enzyme			0.00274	AOAH,CH25H,KLHL13,SQSTM1
MAPK10	-0.422	kinase		0.218	0.00274	BBC3,FOS,Hrk,JUN	415 (18)
RCOR1		transcription regulator			0.00274	COL1A2,SCN1A,SCN2A,SERPINE1	213 (8)
SCH772984		chemical drug		-0.762	0.00274	FOS,JUN,JUNB,MMP9	255 (10)
101.10 peptide		chemical reagent		-0.927	0.00274	GJA1,IL1RN,MMP9,PTGFR	207 (10)
cyclopiazonic acid		chemical - endogenous non-mammalian		1.997	0.00274	DDIT3,EGR1,FOS,Hrk	390 (24)
morin		chemical - endogenous non-mammalian		1	0.00274	CCND1,COL18A1,MMP9,PTPN6	320 (14)
N6-cyclopentyladenosine		chemical reagent			0.00275	FOS,RGS2,RGS4
L-proline		chemical - endogenous mammalian			0.00275	CCND1,CDKN1A,LIF	326 (17)
Li+		chemical reagent			0.00275	CCND1,FOS,GJA1	311 (16)
GCS-100		chemical drug			0.00275	CCND2,CDKN1A,LGALS3	158 (7)
2,5-bis(5-hydroxymethyl-2-thienyl)furan		chemical reagent			0.00275	BBC3,CDKN1A,GADD45A	298 (12)
Retinoic acid-RAR-RXR		complex			0.00275	CRABP2,DUSP1,IGFBP3
IL-2R		complex			0.00275	CCND2,FOS,PHGDH	240 (16)
STAG1		other			0.00275	MYC,PCDH11X,PCDH7
immune complex		complex			0.00275	IL1RN,SOCS1,SOCS3	202 (10)
evofosfamide		chemical drug			0.00275	CCND1,CCND2,CDKN1A
BAG6		enzyme			0.00275	BBC3,CDKN1A,SERPINE1	404 (20)
NFE2L3		transcription regulator			0.00275	BBC3,CDKN1A,RAB27A
mir-190		microRNA			0.00275	CCND1,CLDN1,MYC	249 (7)
SMARCA1		transcription regulator			0.00275	CDKN1A,GADD45A,MYC	282 (7)
EGR4		transcription regulator			0.00275	AR,EGR1,EGR2
EIF2AK1		kinase			0.00275	BAG3,DDIT3,HSPB8
EFEMP1		enzyme			0.00275	FBLN5,RELA,SERPINE1
ATF7		transcription regulator			0.00275	DDIT3,DUSP1,DUSP8	106 (4)
WNT7B		other			0.00275	CCND1,MYC,SHH	398 (17)
FKBP1A		enzyme			0.00275	CDKN1A,MMP9,SDC1	415 (23)
H3C6		other			0.00275	SHH,THY1,VGF
ULBP1		transmembrane receptor			0.00275	CCL4,CD83,HLA-A
chlorpyrifos		chemical toxicant			0.00275	CRH,GAL,HMOX1
PCM1-JAK2		fusion gene/product			0.00275	HS6ST2,SOCS3,TUBB6
melanotan-II		chemical drug			0.00275	CRH,FOS,HMOX1	374 (20)
artemisinin		chemical drug			0.00275	CCND1,CDK2,CDKN1A	358 (22)
pyrogallol		chemical toxicant			0.00275	GPX3,JUN,VIP	161 (7)
RIPK2		kinase		1.543	0.00276	ACOD1,CLEC4E,GPR84,HMGCR,MARCKSL1,MYC,PDE4B,RASGRP1,SCD	368 (19)
NS-398		chemical reagent		-0.311	0.00278	BCL2L11,CCND1,CDKN1A,CEBPB,COL1A2,EGR2,HAPLN1,MMP9,PCDH7,S100A9,SPP1	319 (23)
Fcer1		complex	Activated	2.375	0.00278	CCL4,CD83,FOS,IL1RN,JUN,LIF,RELA,SPHK1	346 (17)
HES1		transcription regulator		0.345	0.00278	BBC3,CDKN1A,DLL3,DUSP1,HTR1A,PAX2,SPP1,TUBB3	370 (22)
HNRNPU		transporter		1.134	0.00278	C1QC,GPNMB,IFIT3,INHBB,KITLG,MYC,PRLR,SPP1
TXNIP		other		-0.053	0.00278	BCL6,CCND1,CDKN1A,COL1A2,LPL,NOX4,RELA,STARD4	402 (21)
ADORA2A		G-protein coupled receptor		-0.599	0.0028	ATP1A2,ATP2B3,COL3A1,DUSP1,EGR2,FOS,HMOX1,KIF5A,MMP9,RAB6A,TSC22D3,TUBB3,TUBB4A	345 (22)
RNF20		enzyme		-1	0.0028	CDK2,CDKN1A,FOS,FOSL2,MYC
BPIFB1		other		-1.387	0.0028	CCND1,JUN,MYC,RASSF4,RELA	311 (19)
LHX2		transcription regulator		1	0.0028	EDN2,GNAL,LIF,NCAM2,ROBO2
MST1		growth factor		0.651	0.0028	CCND1,FOS,IL1RN,PAX2,SPP1	243 (19)
Trp53cor1		other		-0.2	0.0028	BBC3,CDKN1A,NPTX1,POU4F3,STAT3	307 (13)
BTRC		enzyme		0.555	0.0028	CCND1,CDKN1A,CTTN,GLUL,RELA	322 (19)
CD9		other			0.0028	CALB2,ITGA3,ITGA5,MMP9,MYC	336 (23)
NOS1		enzyme		0.625	0.0028	EGR1,FOS,PDE5A,RELA,SOCS1	407 (23)
ADAMTS12		peptidase		-1.432	0.0028	ACOD1,Chil3/Chil4,CLEC4E,HDC,S100A9
KN-62		chemical drug		-0.447	0.0028	ATF3,CCND1,DDIT3,EGR1,MMP9	284 (22)
Ifn		group		1.554	0.00283	ADAMTS1,BCL6,CD83,CH25H,FOS,HLA-A,IL27,MMP9,Mx2,SERPINE1,SOCS1,SPP1	253 (16)
LCN2		transporter		-1.531	0.00283	ATF5,CCL4,Chil3/Chil4,ESR1,HMOX1,IL1RN,SCD,SPP1,TAGLN2,TINAGL1	379 (22)
phorbol esters		chemical - other		1.89	0.00283	CRH,DUSP1,EGR1,FOS,JUN,JUNB,LIF,MMP9,PLAT,VIP	362 (22)
ALB		transporter		1.342	0.00288	CDKN1A,DDIT3,EDNRB,RELA,SCD,SQSTM1,SYNPO	382 (20)
IL24		cytokine		1.99	0.00288	BCL2L11,BCL6,CCND1,DDIT3,GADD45A,GADD45G,IL27	372 (17)
ADAM10		peptidase		1.912	0.00298	CCL4,CCND1,Chil3/Chil4,FOS,GADD45G,GRIN2A,ITGA5,LTF,PVALB,RGS4,S100A9,SCN2A,TUBB2B	351 (21)
Brd4		kinase	Activated	2.714	0.00299	COL1A2,COL3A1,COL4A1,COL4A2,COL4A5,COL6A3,EDNRB,LGALS3,MYC,PLAT,Serpina3g (includes others)	347 (12)
RELB		transcription regulator	Activated	2.373	0.00302	CCND1,CDKN1A,CRH,ENPP2,ESR1,LTBR,MARCKSL1,MYC,RELA	323 (19)
interferon beta-1a		biologic drug			0.00302	AOAH,GADD45B,IL1RN,LILRB3,LTF,MMP9,NFIL3,PLAUR,PPP1CC,S100A9,TNFAIP6,TNFRSF1B
DIO3		enzyme		-1.175	0.00306	CYP11A1,DHH,F5,GREB1,HLA-A,Hrk,ITGA7,KCNC2,KCNJ3,MMP9,NFAM1,PRLR,PTPRR,SHH,STK32C	200 (7)
MYOCD		transcription regulator		-0.366	0.00306	CCBE1,CDKN1A,CLSTN2,COL1A2,COL3A1,DDIT3,FOS,GJA1,KCNJ3,TNNT2
elaidic acid		chemical - endogenous mammalian	Inhibited	-2.563	0.00306	ACAT2,CYP51A1,DHCR24,ELOVL6,FDFT1,HMGCR,HMGCS1,IDI1,PHGDH,SCD
CP-55940		chemical reagent			0.00308	AR,CCL4,GADD45A,JUN,JUNB,MYC	306 (17)
PRDM16		transcription regulator		0.737	0.00308	CDKN1A,GADD45G,GPX3,IFI44,Mx2,SERPINE1	199 (10)
COL4A3		other			0.00308	COL1A2,COL3A1,COL4A1,COL4A2,COL4A5,MMP9	289 (15)
RHOA		enzyme		1.622	0.00321	CCND1,CDKN1A,CEBPB,COL3A1,ESR1,FOS,JUN,MMP9,PRLR,RHOC,STAT3	352 (23)
AVP		other		0.441	0.00323	APLN,ATF3,CCND1,COL3A1,EDNRB,EGR1,FOS	332 (21)
SFTPA1		transporter	Inhibited	-2.333	0.00329	CDH10,EGR1,FOS,FOSB,GFPT2,MYC,PDK4,RELA,SERPINE1	363 (19)
fenretinide		chemical drug		1.136	0.00329	ATF3,BBC3,CCND1,DDIT3,IGFBP7,JUN,MMP9,MYC,RELA	323 (16)
PDLIM2		other		-1.32	0.00331	CCND1,ENPP2,GSTM1,IFI44,IFIT3,IGFBP3,NAP1L2,PHLDA3,SH3GL2,STC2	185 (10)
JUN/JUNB/JUND		group			0.00333	FOS,FOSL1,HMOX1,JUN,STAT3	265 (12)
DCAF1		kinase	Inhibited	-2.219	0.00333	CDKN1A,KLF10,SOCS3,TGM2,UCN
PROCR		other		1.095	0.00333	CCND1,GBP6,LIF,MMP9,MYC	352 (21)
mir-9		microRNA		-0.27	0.00333	AR,BCL6,JAK3,RUNX1,RUNX1T1
TRPC1	-0.329	ion channel		0.156	0.00333	CCND1,CCND2,CDKN1A,SPHK1,TRPC1	351 (22)
FGF9	-0.308	growth factor		0.853	0.00333	BMP4,CCND1,CYP11A1,HMOX1,SHH	331 (24)
calyculin A		chemical toxicant		0.447	0.00333	CCND1,CCND2,CDKN1A,EGR1,TGM2	339 (20)
ritonavir		chemical drug		-0.283	0.00337	ACAT2,CCND2,FDFT1,HMGCR,IDI1,KIF14,KITLG,MMP9,MSMO1,MYC,NAGK,SCD,TSC22D3	370 (18)
tributyrin		chemical drug		1.414	0.00338	AKAP12,ATF3,CD274,CDKN1A,CLDN1,DUSP1,KRT6B,RGS4	248 (13)
PPP2CA		phosphatase		1.387	0.00338	AHR,BCL2L11,CCND1,CDKN1A,EIF4EBP1,MYC,SOCS1,SOCS3	350 (22)
PTK2		kinase		0.776	0.00338	CCND1,CDKN1A,COL1A2,DSP,FOS,ITGA5,MMP9,SPP1	387 (24)
NEUROG1		transcription regulator		0	0.00338	CCND2,COL3A1,DSP,FGF9,GFPT2,LIX1,MMP9,SERPINF1	248 (7)
CD200R1		transmembrane receptor	Inhibited	-2.138	0.00338	AR,ATF3,EGR1,JUN,JUNB,MYC,RELA,TNFRSF12A	352 (20)
OTX2		transcription regulator		1.912	0.00338	A2M,BMP4,ENPP2,GBX2,GPNMB,PAX2,RDH10,SEMA3C
N-[N-(3,5-difluorophenacetyl-L-Ala)]-S-phenylglycine t-butyl ester		chemical - protease inhibitor		-1.515	0.00344	ADGRG1,CHAC1,GADD45B,HAPLN1,HEY1,ITGA5,JUNB,MYD88,NOTCH3,RELA,SERPINE1	344 (18)
estradiol valerate		chemical drug		-0.762	0.00347	ESR1,LTBP1,PGR,TUBB4A	253 (7)
ADP		chemical - endogenous mammalian		0.068	0.00347	CCL4,FOS,HMOX1,SERPINE1	319 (20)
desoxycorticosterone		chemical - endogenous mammalian		1.728	0.00347	FOS,NOX4,SERPINE1,SPP1	312 (19)
pCPT-cAMP		chemical - kinase inhibitor		1.982	0.00347	EGR1,FOS,JUN,JUNB	364 (16)
Foxo		group			0.00347	BCL2L11,CDKN1A,GADD45A,TRIB3	276 (12)
anacardic acid		chemical - endogenous non-mammalian			0.00347	AR,DDIT3,MMP9,PLAT	323 (18)
Hmgb1		transcription regulator		-1	0.00347	CCND1,CDKN1A,NEFL,TUBB3	333 (13)
HBP1		transcription regulator		-0.5	0.00347	CCND1,CDKN1A,PDK4,PIM1	398 (19)
LAMA5	0.342	other		-0.038	0.00347	CCL4,MMP9,SHH,TNFRSF1B
ITGB6		other		0.577	0.00347	COL1A2,COL3A1,MMP9,SERPINE1	307 (18)
ACSL5		enzyme		1.982	0.00347	ELAPOR2,GALNT13,GFPT2,MDK
CNOT3		other		-1.982	0.00347	CDKN1A,EBF1,MYC,PDK4
HDAC8		transcription regulator		-1.964	0.00347	BBC3,BMP7,CDKN1A,SOCS1	270 (7)
AP20187		chemical reagent			0.00347	CEBPB,EGR1,FOS,S100A9	277 (11)
amlodipine		chemical drug		0.218	0.00347	ANXA2,CD274,HMGCR,S100A10
zearalenone		chemical toxicant		1.904	0.00347	CCND1,ESR1,KITLG,MYC	295 (12)
bombesin		chemical - endogenous mammalian		1	0.00347	GREB1,IGFBP3,MYC,SHH	170 (4)
sulforafan		chemical drug		1.375	0.00351	ADAMTS1,ALDH1L2,CCND1,CDKN1A,FOS,GBE1,GSTM1,GSTM5,HLA-A,HMOX1,HTR1A,MICALL1,MMP9,MSTN,Mt1,RELA,RUNX1T1,SOCS3,SQSTM1,TST	297 (16)
FTO		enzyme		0.749	0.00352	CALB2,CCND1,CYP26A1,JUN,MYC,PDE4B	404 (23)
NSUN6		enzyme		1.633	0.00352	DDAH1,FLNA,PHGDH,SERPINE1,TGM2,TNNT2
JAG2		growth factor		-0.816	0.00352	BCL6,BMP7,CEBPB,IL1RN,NOTCH3,SPP1
CTBP1		enzyme		-1.177	0.00361	BMP7,CDKN1A,COL1A2,ENPP2,FOS,HMGCR,JUP
peptidoglycan		chemical - endogenous non-mammalian	Activated	2.739	0.00369	CCL4,CD274,DUSP1,EGR1,FOS,HMOX1,IL1RN,JUNB,MYD88,RELA,S100A9	327 (16)
2,4,5,2',4',5'-hexachlorobiphenyl		chemical toxicant		0.905	0.00369	AKAP12,EBF1,ELOVL6,GADD45A,GADD45B,HMGCR,IL1RAP,Mx2,MYC,RBPMS,SLC1A4
dactolisib		chemical drug		-1.043	0.00372	BCL2L11,CDKN1A,EIF4EBP1,HK1,IGFBP3,MYC,PCK2,SQSTM1	326 (22)
mir-122		microRNA	Inhibited	-2.488	0.00386	CDA,CLIC4,FOSL2,HMGCR,INSIG1,MTHFD2,RCC2,SEPTIN9,SLC7A1,TGM2
estradiol benzoate		chemical drug		0.845	0.0039	AHR,AR,CYP11A1,ESR1,FOS,GJA1,PGR,PLAT,VIP	378 (23)
RNF187		enzyme	Inhibited	-2.135	0.0039	AHR,ATF3,CCND1,CDKN1A,HMOX1,JUN,LTF,PBXIP1,ZFP36L1	305 (11)
UTP		chemical - endogenous mammalian	Activated	2.161	0.00393	FLNA,KCNC4,KCND2,SERPINE1,SPP1	280 (16)
p70 S6k		group		0.277	0.00393	BCL2L11,CCND1,GAP43,NOX4,SCD	397 (23)
ELOVL5		enzyme		0.626	0.00393	ELOVL6,MLXIPL,PDK4,SCD,TRIB3	208 (11)
entolimod		biologic drug		1.432	0.00393	ATF3,CCL4,DUSP1,HMOX1,JUNB	189 (7)
CTBP2		transcription regulator			0.00393	CCND1,EOMES,HMGCR,JUP,NEFL	288 (7)
miR-335-3p (miRNAs w/seed UUUUCAU)		mature microRNA	Inhibited	-2.236	0.00393	COL1A2,COL4A1,COL4A2,COL4A5,NID2
REN		peptidase		1.934	0.00393	APLN,COL3A1,FOS,NOX4,RELA	352 (12)
SFN		other	Activated	2.213	0.00393	BCL6,DSG2,DSP,JUP,PDK4	164 (7)
SL 327		chemical - protease inhibitor		-0.555	0.00393	ARMH4,BBC3,FOS,FOSB,HECW1	290 (11)
phorbol 12,13-didecanoate		chemical toxicant		-0.156	0.00393	CDKN1A,DUSP1,IL1RAP,MYC,PRKCD	361 (22)
DNMT3B	0.396	enzyme		0.962	0.004	ADORA1,CDKN1A,DDIT3,DNMT3B,ESR1,HDAC9,MYC,NAP1L2,POLD4,PPP1R14C,RCAN2,RGS4,SH2D1A,SLC7A11,TNNT2	376 (20)
CARM1		transcription regulator		1.948	0.00401	CDKN1A,EGR3,FOS,GADD45A,MYC,STC2	379 (23)
pimagedine		chemical drug		-0.896	0.00401	CAST,COL4A1,GADD45B,HMOX1,RELA,SERPINE1	397 (21)
tempol		chemical drug		-1.633	0.00401	BMP4,MMP9,PLAUR,RELA,SERPINE1,SPP1	319 (20)
sphingosylphosphocholine		chemical - endogenous mammalian			0.00401	FOS,JUN,TGM2	303 (18)
SW016789		chemical reagent			0.00401	ATF3,DDIT3,DUSP1	192 (7)
Bcl9-Cbp/p300-Ctnnb1-Lef/Tcf		complex			0.00401	CCND1,GJA1,MYC
BMS-387032		chemical drug			0.00401	CCND1,CDK2,PDGFRA	244 (10)
AAMDC		other			0.00401	MYC,PHGDH,SHMT2
ZBED2		transcription regulator			0.00401	CMPK2,HLA-A,PIM1
TRIB2		kinase			0.00401	AR,CEBPB,POU3F2
SPTAN1		other			0.00401	CDKN1A,ITGA3,ITGA5
nicotiflorin		chemical reagent			0.00401	MMP9,RELA,STAT3	173 (7)
MED15		transcription regulator			0.00401	BBC3,CCND1,CDKN1A	199 (7)
SFRP2		transmembrane receptor			0.00401	MYC,PDGFRA,ROR2
PRSS8		peptidase			0.00401	CCND1,MMP9,MYC
OTUD7B		peptidase			0.00401	ESR1,GREB1,RIPK1	245 (7)
SIX3		transcription regulator			0.00401	CCL28,CCND1,PDGFRA
PPP1CA		phosphatase			0.00401	AR,FOS,SPP1	381 (24)
CSNK1A1		kinase			0.00401	CCND1,CDKN1A,MYC	354 (18)
GNRH2		other			0.00401	FOS,FOSB,JUN	424 (23)
SERPINH1		other			0.00401	COL4A2,DDR2,SERPINE1
asbestos		chemical toxicant			0.00401	FOSL1,JUN,JUNB	140 (7)
1,1-bis(3'-indolyl)-1-(4-trifluoromethyl-phenyl)methane		chemical reagent			0.00401	AR,ATF3,CDKN1A	204 (7)
prodigiosin		chemical toxicant			0.00401	BBC3,CDKN1A,DDIT3	353 (17)
ziprasidone		chemical drug			0.00401	CRH,HMGCR,HMGCS1
3-beta,17-beta-androstanediol		chemical - endogenous mammalian			0.00401	AR,BBC3,ESR1	252 (7)
lead acetate		chemical toxicant			0.00401	CCND1,GSTM1,GSTM5
BCOR		transcription regulator		-1.342	0.00403	ADAMTS1,BMP7,CCNO,CDKN1A,COL18A1,IRX2,MYC	193 (7)
ABCG1		transporter		-0.378	0.00403	CCL4,CH25H,CYP7B1,GBP6,HMGCR,INSIG1,MYC	367 (24)
POLR2A		enzyme			0.00409	CCND1,CDK2,CDKN1A,CYP26A1,EGR2,FOS,MYC,STC2	325 (15)
TCF20		transcription regulator		1.134	0.00409	B3GALT5,CRH,ETNPPL,FRZB,MYC,PLS3,SCN4B,SQSTM1
BACH2		transcription regulator		-1.941	0.00409	AHR,BCL6,HMOX1,JUN,JUNB,S100A9,SDC1,TNFRSF4	387 (16)
Ifn gamma		complex		1.537	0.00416	CDKN1A,ESR1,LIF,MMP9,MYC,MYD88,PCDH7,SH2D1A,SOCS1,SOCS3	274 (18)
RGS4	-0.849	enzyme		-1.265	0.00416	CALN1,EIF5A2,Gm10222,NDST4,NEFL,NELL1,PCDH9,PRSS12,SCN7A,SPP1
MACROH2A1		other		-0.956	0.00423	ANXA2,CCND2,CDKN1A,EGR1,FGF1,GADD45A,HIF3A,LPL,SERPINE1	228 (12)
fingolimod		chemical drug		-1.539	0.00423	CCL4,CD274,CDK2,CDKN1A,COL3A1,FOSB,FOSL1,SERPINE1,SPHK1	382 (21)
IL22		cytokine		0.701	0.00427	BCL3,CCL4,CCND1,CD274,CLDN1,CLDN2,HMOX1,HSPB1,MMP9,Muc1,MYC,S100A9,SOCS3	305 (18)
GY1-22		chemical reagent			0.00433	CCND1,CDKN1A
LLL12B		chemical reagent			0.00433	CCND1,MYC
FKHR		group			0.00433	A2M,CCND1
Stat1-Stat3		complex			0.00433	A2M,FOS
MLN8054		chemical drug			0.00433	BBC3,CDKN1A
hexa-D-arginine		biologic drug			0.00433	GJA1,PTGFR
INTS11		enzyme			0.00433	EGR1,FOSB
NIBAN2	0.349	transcription regulator			0.00433	CCND1,MYC	257 (7)
SMYD2		enzyme			0.00433	GREB1,PGR
ZNF451		enzyme			0.00433	CDKN1A,SERPINE1
NDUFAF3		other			0.00433	CCND1,ESR1
C1QL1		other			0.00433	CRH,FOS	273 (13)
avexitide		biologic drug			0.00433	FOS,NOX4	217 (11)
potassium channel		group			0.00433	FOS,JUN	97 (7)
RNF32-DT		other			0.00433	CCND1,MYC
KLHL2		other			0.00433	CCND1,JUN	183 (7)
DSTYK		kinase			0.00433	CCND1,MYC
TRPM3		ion channel			0.00433	EGR1,FOS
OLA1		enzyme			0.00433	CCND1,CDKN1A	264 (7)
ATP13A2		transporter			0.00433	CTTN,DDIT3
ATP1A2	1.099	transporter			0.00433	ATP1A2,FOS
defibrotide		biologic drug			0.00433	PLAT,SERPINE1
pimasertib		chemical drug			0.00433	BBC3,BCL2L11
SRGAP1		other			0.00433	CCND1,MYC
vistusertib		chemical drug			0.00433	HMOX1,MYD88
GPC3		other			0.00433	CCND1,MYC	310 (12)
RRAD		enzyme			0.00433	CCND1,LPL
MAT2B		enzyme			0.00433	CCND1,HMOX1	217 (7)
PMEPA1		other			0.00433	AR,CDKN1A
riociguat		chemical drug			0.00433	SERPINE1,SPP1	162 (7)
mir-541		microRNA			0.00433	AR,PTPRN
MAPK15		kinase			0.00433	AR,JUN	251 (7)
ATOX1		transporter			0.00433	CCND1,SOD3
SGI 1776		chemical drug			0.00433	CCND1,MYC	288 (9)
SCN1B		ion channel			0.00433	FOS,SCN2A
RYBP		transcription regulator			0.00433	CCND2,RUNX1
EIF2B1		translation regulator			0.00433	CCND1,DDIT3
BMP1		peptidase			0.00433	IGFBP3,OGN
TOR2A		other			0.00433	FOS,MYC
DDX24		enzyme			0.00433	BBC3,CDKN1A	151 (7)
ZNF350		transcription regulator			0.00433	GADD45A,MMP9
TRERF1		transcription regulator			0.00433	CDKN1A,CYP11A1
IFT20		other			0.00433	GLI2,PDGFRA
RASSF7		other			0.00433	CCND1,CDKN1A
silvestrol		chemical - endogenous non-mammalian			0.00433	CD274,JUN
PES1		other			0.00433	CCND1,HMOX1
TCP1		other			0.00433	BBC3,CDKN1A	189 (7)
8-butyl-10-[(3-methoxy-5-pyrrol-2-ylidenepyrrol-2-ylidene)methyl]-11-azabicyclo[7.2.1]dodeca-1(12),9-diene		chemical reagent			0.00433	BBC3,CDKN1A
RPL37		other			0.00433	BBC3,CDKN1A
GBP2		enzyme			0.00433	HLA-A,MMP9	173 (7)
CYP2C9		enzyme			0.00433	CCND1,DUSP1	258 (7)
RDH16		enzyme			0.00433	CCND1,CYP26A1
ATAD2		enzyme			0.00433	CCND1,MYC	176 (7)
UIMC1		other			0.00433	BBC3,CDKN1A
RX-821002		chemical reagent			0.00433	EGR1,FOS	215 (12)
chlordecone		chemical toxicant			0.00433	LTF,PGR
ethyl ether		chemical reagent			0.00433	CRH,FOS	184 (7)
rocuronium		chemical drug			0.00433	CCND1,MMP9
protein phosphatase		complex			0.00433	ESR1,PIM1
tarenflurbil		chemical drug			0.00433	CCND1,JUNB
LFM-A13		chemical drug			0.00433	CCND2,HMOX1	267 (20)
10-decarbamoylmitomycin C		chemical toxicant			0.00433	CDKN1A,GADD45A
taprostene		chemical reagent			0.00433	DUSP1,TSC22D3
CBFA2T3-GLIS2		fusion gene/product			0.00433	BMP4,DNMT3B
Ala-Tyr-Pro-Gly-Lys-Phe-NH2		chemical reagent			0.00433	EGR1,FOS	325 (21)
L-JNK inhibitor I		chemical reagent			0.00433	HMOX1,SPHK1
mizoribine		chemical drug			0.00433	CCND1,CDK2
ponasterone A		chemical reagent			0.00433	CCND1,GRM1
Pdgf Ab		complex		1.179	0.00433	CCND1,FOS,HMOX1,SCD	260 (17)
ARHGDIG		other		0	0.00433	ALCAM,JUP,PLCD1,RGS2
KLF9		transcription regulator		1.698	0.00433	CALB2,CCND1,ESR1,PGR	320 (13)
PPP3CB		phosphatase		0.489	0.00433	CDKN1A,GADD45A,NOX4,RUNX1	335 (13)
MXI1		transcription regulator		-1.919	0.00433	MTHFD2,MYC,SLC1A4,SLC7A1
HOXC9		transcription regulator			0.00433	BMP4,MMP9,SHH,SPP1
ATP2A2		transporter		0	0.00433	ATP2B3,CCND1,DDIT3,SCD	195 (7)
ATXN7		other			0.00433	BBC3,ITPKA,Sik1,VSNL1
BARX2		transcription regulator		-1.154	0.00433	ESR1,FGF12,FLNA,MMP9	146 (7)
RPS6KA3		kinase		1.966	0.00433	DDIT3,FOS,MYC,RELA	368 (20)
indirubin		chemical drug		-1	0.00433	CCND1,JUN,MMP9,MYC	399 (16)
FTI-277		chemical reagent		-1.103	0.00433	CCND1,MYC,PGR,SERPINE1	354 (23)
2,3-bis(4-hydroxyphenyl)-propionitrile		chemical reagent		0.811	0.00448	AR,CCND1,FDFT1,FOS,HMGCS1,HMOX1,PGR	384 (18)
3-nitropropionic acid		chemical toxicant		0.277	0.00448	ATP1B1,JUN,LDHB,MMP9,MYC,SLC7A11,SQSTM1	292 (16)
NFATC3		transcription regulator		0.265	0.00448	ATF3,EGR2,EGR3,FOS,FOSB,GAP43,JUN,LRRC55	358 (15)
3,3'-diindolylmethane		chemical drug		0.819	0.00448	AR,ATF3,BBC3,CCND1,CDKN1A,HLA-A,HMOX1,RELA	334 (17)
Rxr		group			0.00453	BMP7,CDKN1A,CYP26A1,GADD45A,INSIG1,LTF,MYC,Neat1,PDK4,SERPINF1,SPP1	357 (24)
mir-146		microRNA		-1.802	0.00453	DUSP1,FOS,IDI1,MMP9,MYC,MYD88,PANK1,PDGFRA,RELA,RUNX1,SOCS1	413 (16)
LGALS3	1.07	other		-0.082	0.00453	CCND1,CDKN1A,CEBPB,Chil3/Chil4,COL3A1,COL4A1,CTSH,ENPP2,MYC,SOCS3,SPP1	371 (20)
VHL		transcription regulator		-0.955	0.00453	ADGRG1,BBC3,BCL2L11,CCND1,CDKN1A,GBE1,GNG4,HMOX1,ITGA5,LMNA,NOX4,RUNX1,ZFP36L1	291 (19)
LIPE		enzyme			0.00453	ATF3,BCL6,CEBPB,COL1A2,EGR1,FMOD,FOS,GJA1,JUP,KITLG,PDK4,PVALB,SCD	319 (19)
oleanolic acid		chemical - endogenous non-mammalian		-0.156	0.00455	AHR,CCND1,CDKN1A,HMOX1,MMP9,SOCS3	295 (17)
NR0B1		ligand-dependent nuclear receptor		-0.152	0.00455	AR,CYP11A1,GPR101,INSL3,LOXL1,MLXIPL	390 (11)
fluoride		chemical - endogenous mammalian		0.822	0.00459	DDIT3,FOS,GADD45A,GLI2,PRKCQ,TUBB2B,TUBB3,TUBB4A,TUBB6	197 (5)
GRP		growth factor	Activated	2.196	0.0046	CCND1,FOS,FOSB,JUN,MYC	357 (21)
hemozoin		chemical - endogenous non-mammalian		0.463	0.0046	CCL4,CD83,HMOX1,MMP9,S100A9	356 (15)
TERT		enzyme		-0.428	0.00473	AR,ATF3,CCND1,CDKN1A,EIF5A2,FAM167A,GSN,IFI44,IFIT3,JUP,MMP9,Mx2,MYC,SPP1,STAT3,TNFRSF1B	380 (27)
Notch		group		0.706	0.00479	CDKN1A,DLL3,DUSP1,GADD45B,HEY1,LTBR,MEX3A,MYC,Nes,NFAM1,NOTCH3,RELA,SORL1	356 (21)
ASPSCR1-TFE3		fusion gene/product	Activated	3.162	0.00481	ADGRG1,ANGPTL2,CAST,CTTN,EZR,GPNMB,HMOX1,MAFF,OLFML2A,UAP1L1
BRCA1		transcription regulator		0.115	0.0049	AR,CCND1,CDKN1A,COL18A1,DDIT3,EGR1,ENPP2,ESR1,EZR,GADD45A,GADD45B,HMOX1,HSPB1,IFIT3,MYC	377 (21)
Collagen type I (complex)		complex		-0.128	0.0049	CCND1,CD83,EIF4EBP1,ITGA3,MMP9,MYC,PGR,S100A10	355 (21)
CXCR4		G-protein coupled receptor		0.869	0.0049	CCND1,CDKN1A,EGR1,IGFBP7,JUNB,MYC,PGR,SHH	329 (18)
MYRF		transcription regulator		0	0.0049	BCL2L11,JUNB,NOTUM,NRIP2,PDK4,PLAUR,PWWP3B,UAP1L1
GW 4064		chemical toxicant	Activated	2.131	0.0049	DDAH1,MMP9,NR1H4,PCK2,PDK4,SDC1,SOD3,TRIB3	145 (4)
dehydroisoandrosterone		chemical - endogenous mammalian		-0.173	0.00497	AR,BMP4,CCND1,EDIL3,ESR1,LGALS3,MYC,PTP4A1,SCD	431 (24)
TAFAZZIN		enzyme		-0.285	0.0051	ADAMTS1,ANXA2,BCL2L11,CCND1,Chil3/Chil4,DUSP1,EGR2,ENPP2,FBLN2,GBE1,GSTM5,HELLS,HLA-A,HMOX1,KLF6,MYC,OLFM4,RGS4,SEMA3C,SERPINE1,SIPA1	314 (22)
crizotinib		chemical drug		0	0.00513	BCL2L11,CD274,COL3A1,PTP4A1,SCD,SERPINE1	382 (22)
Mir122a,b		group		-1.664	0.00513	CD68,HMGCR,MMP9,PLAUR,RELA,SOCS1	336 (10)
SAA1		transporter		1.664	0.00513	CCL4,CCND1,Chil3/Chil4,IL1RN,MMP9,S100A9	397 (17)
PDPK1		kinase		-1.048	0.00513	A2M,CCND1,CDKN1A,DYNC1I1,MYC,SERPINE1	361 (24)
carbamylcholine		chemical drug		0.89	0.00513	CCND1,CDKN1A,EGR1,FOS,JUN,RGS2	417 (24)
naringenin		chemical - endogenous non-mammalian		0.254	0.00513	CCL4,COL3A1,GJA1,HMOX1,MMP9,PGR	340 (21)
pexidartinib		chemical drug		0.632	0.00517	BCL6,DSP,EIF4EBP1,INSIG1,MFSD6,PCDH7,PDE7B,PDGFRA,SLC1A4,TUBB4A
cephaloridine		chemical drug	Activated	3.138	0.00517	CDT1,DSG2,GPNMB,GSTM5,HMOX1,LAMB3,POLA2,RND1,TNFRSF12A,TRIB3
KMT2D		transcription regulator		0.61	0.0052	ADGRG1,ADGRG2,BVES,CD274,CHURC1,LAMB3,LOXL1,MMP9,PCDH7,RAB38,SH3BGRL2,SPRR1A,STBD1,TNNT2,Tpm4,TRIQK	149 (6)
Rp-cAMPS		chemical - kinase inhibitor		0	0.00532	HMOX1,INA,SPP1,SYNPO	161 (7)
TMSB4		group		1.969	0.00532	BMP4,ITGA3,SERPINE1,SPP1	275 (11)
FGFR		group		1	0.00532	FOS,HEY1,HMOX1,SPP1	322 (21)
PREX1		other		-1	0.00532	ADGRG1,BMP7,LMNA,SEMA3A
volasertib		chemical drug		0	0.00532	ESR1,GADD45A,HELLS,MYC	296 (11)
TEK		kinase		0.152	0.00532	APLN,CDKN1A,S100A9,TUBB3	215 (13)
GNA11		enzyme		1.091	0.00532	ADAMTS1,EDN2,EGR3,PGR
vanadate		chemical - other		0.025	0.00532	CCND1,ESR1,JUN,PGR	310 (19)
peroxynitrite		chemical toxicant		1.067	0.00532	DDIT3,FOS,MARCKSL1,RGS2	392 (23)
GC-GCR dimer		complex		1.196	0.00534	BCL2L11,DUSP1,IL1RN,PDK4,TSC22D3
SFRP4		transmembrane receptor		0	0.00534	CCND1,GREM2,MYC,PRLR,TNNT2	228 (7)
epoxomicin		chemical - protease inhibitor	Activated	2.176	0.00534	BCL2L11,DDIT3,GJA8,NOX4,SQSTM1	332 (14)
N(G)-monomethyl-D-arginine		chemical - endogenous mammalian		0.19	0.00534	CD8A,FOS,HMOX1,MMP9,PLAUR	318 (17)
USF1		transcription regulator		0.927	0.00537	AKAP12,APLN,DUSP1,IGFBP3,Mt1,MYH9,SERPINE1,SPP1,SYNPO
thyroid hormone		chemical - endogenous mammalian		-0.199	0.00542	CCND1,CDK2,CDKN1A,DDAH1,EGR1,FDFT1,FOS,HMGCR,IGFBP3,LPL,MYC,S100A10,TRHR,Trhr2,VIP	363 (22)
PRKAA		group		1.333	0.00549	AR,CCND1,CDKN1A,CLDN1,CYP11A1,DUSP1,RELA	379 (26)
BIRC5		other			0.00549	C1QC,CDKN1A,COL3A1,FBLN1,FBN1,FMOD,ITGA5	256 (7)
IRF9		transcription regulator		-0.475	0.00549	CD274,GBP6,IFIT3,IL27,SOCS1,SOCS3,STAT3	264 (16)
ANKRD17		other			0.00557	ARID5A,HDC,SOCS3
CLEC14A		other			0.00557	EGR1,PLAUR,RELA
EBF4		transcription regulator			0.00557	CDKN1A,EOMES,JAK3
PHF21A		other			0.00557	PTPRN,SCN2A,SNAP25
AGTRAP		G-protein coupled receptor			0.00557	FOS,GJA1,HMOX1	315 (20)
CD244		transmembrane receptor			0.00557	CCL4,EGR1,FOS	330 (20)
ITGA4		transmembrane receptor			0.00557	IL1RN,ITGA5,MMP9	307 (14)
PKP2		other			0.00557	COL3A1,DSP,GJA1	93 (3)
HCRT		other			0.00557	EGR1,FOS,KITLG	444 (26)
RANBP9		other			0.00557	FOS,GAP43,JUN	384 (20)
ANGPTL3		growth factor			0.00557	ELOVL6,HSPG2,SCD	158 (7)
SH2B1		other			0.00557	FOSL1,MYC,PLAUR	303 (12)
COPS8		other			0.00557	CCND2,CDK2,CDKN1A
ADAM9		peptidase			0.00557	CHAC1,ITGA3,SLC1A4
DHH	0.448	peptidase			0.00557	ADAMTS1,CYP11A1,GJA1
GPAT4		enzyme			0.00557	ATF3,DDIT3,GPAT3
RECK		other			0.00557	CCND1,CDKN1A,MMP9	396 (18)
maraviroc		chemical drug			0.00557	CCL4,COL1A2,TNNT2
quinidine		chemical drug			0.00557	CCND1,CDKN1A,KCNA2	286 (13)
alprazolam		chemical drug			0.00557	CRH,GABRG2,UCN
TO-901317		chemical reagent		-0.101	0.00558	CCND1,CDK2,CH25H,CYP11A1,CYP7B1,ELOVL1,ELOVL6,FDFT1,GBE1,GSTM5,LGALS3,LPL,MLXIPL,MMP9,Mt1,SCD,SLC27A2,TGM2	247 (15)
TFAP2A		transcription regulator		1.636	0.00566	ALCAM,CCL28,CCND1,CDKN1A,CYP11A1,ESR1,KITLG,MMP9,PLAUR,RAB27B,S100A9,SERPINE1	396 (21)
FOXC1		transcription regulator		1.155	0.00567	BCL2L11,DSG1,FOS,GPNMB,IFIT3,IGFBP3,KRT6B,MMP9,OTX1,SATB2,SERPINE1,SOCS3,SPP1	268 (8)
INHBA		growth factor		1.53	0.00571	CALB1,CCND2,CDKN1A,CYP11A1,ESR1,INHBB,IRX1,JUNB,PCDH9,PRLR,S100A9,SERPINE1,SLC5A8,SOCS1,TNNT2,ZBTB10	508 (23)
pituitary adenylate cyclase-activating polypeptide		biologic drug			0.00578	CCND1,CCND2,EGR1,ELAVL4,FOSL1,NKD1	237 (7)
SELPLG		other	Activated	2.449	0.00578	CCL4,CDKN1A,FOS,PLAUR,PRKCD,RELA	419 (21)
CDK2AP1		other			0.00578	CCND2,CDK2,FOSL1,MYC,NKD1,WNT10A	393 (25)
SIRT6		enzyme		-0.555	0.0058	CD68,COL3A1,ELOVL1,ELOVL6,HMGCR,MMP9,PLCB1,SCD,SERPINE1	408 (22)
NGEF		other		-1.667	0.0058	CCND2,EDIL3,GPNMB,GRM1,HEY1,OLFML2A,PARP3,RAPGEF4,RCAN2
POU2AF1		transcription regulator		0.986	0.0058	BCL6,CD79A,CD83,GADD45G,IFI44,IFIT3,MYC,S100A10,SPP1	378 (16)
COPS5		transcription regulator	Inhibited	-2.165	0.00582	ANGPTL2,ATF3,CDKN1A,HELLS,HMGA1,HMOX1,INHBB,LDHB,MYC,PDE4B,PHLDA3,S100A10,SLC3A2,SLC7A5,SPHK1,STAT3,TRIB3,ZFP36L1	357 (19)
USF2		transcription regulator		0.823	0.00584	APLN,CFTR,HMOX1,IGFBP3,MYC,MYH9,SERPINE1,SPP1	238 (7)
CUX1		transcription regulator		-0.579	0.00584	CDK2,CDKN1A,FLNA,LILRB3,LTF,MYC,PCDH10,WNT10A	317 (11)
lipoteichoic acid		chemical - endogenous non-mammalian		1.011	0.00584	BCL2L11,CAST,CD83,HMOX1,IL1RN,MMP9,MYD88,TIRAP	261 (16)
diphtheria toxin		chemical - endogenous non-mammalian			0.00587	BCL3,CAST,CD274,CD63,COL1A2,COL3A1,FKBP1B,FOS,S100A10,TGM2,TRPM2	360 (12)
N-cor		group		1.076	0.00594	CCND1,CDKN1A,ELOVL6,ESR1,FOLR1,IGFBP3,MMP9,RAB20,SCD,SOCS1	349 (25)
PTPRR	-0.31	phosphatase	Inhibited	-3.162	0.00594	CALML4,DNMT3B,FLNA,FOS,FOSL1,IFITM2,ITGA5,JUN,MYH9,PBXIP1	235 (7)
MAP2K7		kinase		1.103	0.00605	ATF3,CCND1,CDKN1A,ENPP2,GJA1,JUNB,MYC	396 (20)
CLU		other		-1.287	0.00605	CCND1,CCND2,CDKN1A,GBP6,GBP7,MMP9,RELA	387 (20)
ABCA1		transporter		1.633	0.00605	CYP51A1,FDFT1,GBP6,HMGCR,INSIG1,MMP9,MYD88	355 (22)
Histone h2a		group			0.00617	EGR1,IRX2,JUN,SHH,SLC7A11	224 (7)
caspase		group		1.387	0.00617	CCND1,CCND2,CDK2,CDKN1A,GLUL	400 (25)
BMPR2		kinase			0.00617	CD274,CLIC4,EFNB1,SEMA3C,SPP1	337 (10)
MAC		complex		1.109	0.00617	EGR1,EGR2,FAM110C,FGF1,SPP1	400 (23)
MDM4		transcription regulator			0.00617	BBC3,CDKN1A,LGALS3,NKD2,PCDH10	332 (14)
VAV1		transcription regulator			0.00617	CCND1,CCND2,FOS,JUN,RELA	332 (18)
USP18		peptidase	Inhibited	-2.236	0.00617	BBC3,BCL2L11,Hrk,SOCS1,SOCS3	366 (20)
citarinostat		chemical drug	Inhibited	-2.219	0.00617	IFIT3,LIF,TNFRSF12A,TSC22D3,ZYX
arsenic		chemical toxicant		1.091	0.00617	DDIT3,ESR1,FOS,LTF,Mt1	373 (17)
PRDM5		transcription regulator			0.00626	ALX4,EBF1,GADD45B,MYC,MYD88,RUNX1,SOCS3,STK32C,TINAGL1
IFNL1		cytokine		-0.216	0.00626	ATF3,CD83,CHAC1,CMPK2,DDX60,IFI44,IFIT3,IFITM2,ZC3HAV1	197 (10)
CNR1		G-protein coupled receptor		-0.093	0.00632	ADORA1,BMP4,BMP7,CRH,CYP7B1,EOMES,FOS,KRT6B,MDK,MSTN,PDGFRA,SHH,STAT3	407 (20)
gemfibrozil		chemical drug		1.717	0.00635	ACOT2,BMP7,CCND1,GADD45A,MYC,SCD,SERPINE1,SOCS3	381 (23)
hydroxypropyl-beta-cyclodextrin		chemical drug		0.378	0.00635	APLN,CD68,CD79A,ELOVL1,HMGCR,SDC1,SQSTM1,STAT3
YBX1		transcription regulator		1.879	0.00636	ALKAL2,CDKN1A,COL1A2,CYP11A1,FOS,IGFBP3,LGALS3,MVP,MYC,PLAUR,RIN1,STC2	408 (15)
peoniflorin		chemical drug		1	0.00645	DDAH1,HMOX1,RUNX1,SNAP25
SUCNR1		G-protein coupled receptor	Activated	2	0.00645	COL1A2,COL3A1,COL4A2,LAMA5
SMYD3		enzyme		1.067	0.00645	AR,CDK2,ECEL1,GREB1	255 (7)
PLCG1		enzyme		-0.13	0.00645	CCND1,EGR1,FOS,SERPINE1	365 (21)
mir-515		microRNA		-1.59	0.00645	AR,RELA,SERPINE1,STAT3	221 (7)
SMARCD3		transcription regulator		0	0.00645	ALCAM,FMOD,HAPLN1,ITGA3
AURKB		kinase		-1.109	0.00645	ATF3,BBC3,CDKN1A,SORCS3	267 (12)
GFI1B		transcription regulator			0.00645	CDKN1A,MYC,SOCS1,SOCS3
WWOX		enzyme		-0.339	0.00645	BBC3,ESR1,ITGA3,MMP9	277 (12)
SMURF2		enzyme		-1.964	0.00645	CEBPB,JUN,MLXIPL,SERPINE1	249 (7)
WWTR1-CAMTA1		fusion gene/product		1	0.00645	ATF3,Serpina3g (includes others),SERPINE1,TMEM37
NCD-38		chemical reagent		1.091	0.00645	ATF3,DDIT3,DISP3,FOSB	310 (13)
(1S,2R)-NCL-1		chemical reagent		1.091	0.00645	ATF3,DDIT3,DISP3,FOSB	299 (12)
KT5823		chemical - kinase inhibitor		-0.882	0.00645	FOS,PLAUR,S100A10,TAGLN2	359 (19)
mir-22		microRNA		-0.017	0.00648	BMP7,BMPR1B,CDKN1A,ESR1,FOSL1,RGS2	316 (19)
FUS-DDIT3		fusion gene/product		0.128	0.00648	COL4A1,RGS4,SERPINE1,SOX30,STAT3,TSC22D3	249 (7)
PIM1	1.116	kinase		1.941	0.00666	BBC3,CCND2,CDKN1A,FOSL1,MYC,PIM1,SOCS1	374 (22)
colchicine		chemical drug	Activated	2.611	0.00666	ADCYAP1,ATF3,CRH,FOS,GAP43,JUN,NR1H4	395 (22)
SMO		G-protein coupled receptor			0.00674	ALCAM,CCND1,COL4A2,FBLN2,GLI2,MYC,NKD1,OGN,RUNX1	368 (21)
cinnamaldehyde		chemical toxicant	Activated	2.377	0.00674	DNMT3B,EGR1,FOS,HMOX1,INSIG1,PDK4,SLC7A11,SQSTM1,SRXN1	378 (21)
Nfat (family)		group		1.97	0.0068	ATF3,CCND1,EGR2,KLF6,NOX4,RHOJ,SERPINE1,SLC7A1,TNNT2,TUBB3	226 (12)
SHC1		other		1.029	0.0069	BCL2L11,CDKN1A,DAPL1,EDN2,EGR1,FOS,SERPINE1,SQSTM1	369 (22)
MSTN	-1.512	growth factor		-0.353	0.0069	BMP7,CDK2,CDKN1A,FOS,IGFBP3,INHBB,KLF10,SPP1	442 (21)
KCNIP3		transcription regulator		-1.89	0.0069	CCND1,FOS,FOSB,FOSL2,KCND2,SOCS3,TGM2,TNFAIP6	400 (16)
BAK1		other		0.391	0.00709	BCL2L11,CDKN1A,HLA-A,Ifitm1,IFITM2	297 (16)
ALDH1A2		enzyme	Inhibited	-2.236	0.00709	ATF3,COL1A2,COL3A1,PCOLCE,SPP1	358 (11)
PRKG1		kinase		-0.246	0.00709	CCND1,CDKN1A,COL3A1,FOS,SERPINE1	368 (25)
linsidomine		chemical drug		0.555	0.00709	ANXA2,CRH,EGR1,HMOX1,MYC	371 (20)
selenium		chemical drug		1.067	0.00709	AR,CDK2,CDKN1A,PVALB,STAT3	362 (18)
IRF1		transcription regulator		-0.33	0.00716	ACOD1,CCND1,CD274,CDK2,CDKN1A,CEBPB,CFTR,CMPK2,IFI44,IFIT3,IL27,MMP9,MYC,PCDH7,SOCS1,STAT3	322 (14)
IRF3		transcription regulator		-1.436	0.00716	CALHM6,CCL4,CD274,CLIC4,CMPK2,DDX60,FGF1,IFI44,IFIT3,IL27,JUNB,MMP9,Mx2,SORL1,TNFRSF4,ZC3HAV1	243 (18)
Collagen(s)		complex		1.387	0.00723	BCL3,C4A/C4B,CD63,CD68,DDIT3,PSAT1
A2M	0.658	transporter		-0.218	0.00723	CCL4,CCND1,DDIT3,GADD45B,GAP43,PRLR	345 (20)
ANGPT1		growth factor			0.00723	ADAMTS1,ALCAM,APLN,CCND1,COL3A1,DUSP1	346 (19)
sildenafil		chemical drug		1.387	0.00723	CEBPB,Chil3/Chil4,FGF1,HMOX1,PDE5A,TRPC1
baicalein		chemical drug		-0.728	0.00723	CCND1,DDIT3,FOS,HMOX1,JUN,PTPN6	364 (19)
COL18A1	1.236	other	Inhibited	-2.926	0.00725	CCND1,EDNRB,FOS,JUN,JUNB,MYC,RELA,SERPINE1,STAT3	322 (21)
FGF19		growth factor		1.982	0.00725	CCND1,CYP7B1,EGR1,FOS,GADD45A,HMGCR,IL1RN,RGS2,SCD	287 (20)
SOD2		enzyme		0.631	0.00726	CDKN1A,DDIT3,GSN,HMOX1,MMP9,MYC,MYO3B,RELA,SERPINE1,TMC1	396 (21)
LRP6		transmembrane receptor		1.432	0.00731	CCND1,CD68,FOS,MMP9,MYC,PRLR,SPP1	340 (24)
PLAG1		transcription regulator	Activated	2.619	0.00731	ATF5,EFNB1,EGR1,FLNC,LILRB3,PTP4A3,TGM2
MAPKAPK2		kinase		-0.895	0.00731	DDIT3,HDC,HSPB1,HSPB8,MMP9,PLA1A,PLAT	423 (20)
NFAT5		transcription regulator	Activated	2.72	0.00741	AR,COL1A2,COL4A1,HECW2,IFIT3,IGFBP7,IL1RN,LIF,Mx2,NOX4,PLAT,PTGFRN,SPP1	337 (16)
geneticin		chemical toxicant			0.00744	BBC3,CDKN1A,PLAT
soloxolone methyl		chemical reagent			0.00744	IFI44,SERPINE1,SOCS3
MGAT1		enzyme			0.00744	CLDN1,ITGA3,ITGA5
MIEF2		other			0.00744	HMGCR,HMGCS1,SCD
T 0070907		chemical reagent			0.00744	CDKN1A,COL1A2,HMOX1	188 (9)
PARP14		enzyme			0.00744	CCND1,Mx2,PIM1	158 (7)
LTB4R2		G-protein coupled receptor			0.00744	AR,MMP9,NOX4	216 (9)
Fcor		enzyme			0.00744	BCL2L11,CDKN1A,GADD45A	209 (11)
HUWE1		transcription regulator			0.00744	CCND2,CDKN1A,MYC	360 (16)
SNHG20		other			0.00744	CCND1,CDKN1A,MYC
astragalin		chemical - endogenous non-mammalian			0.00744	MMP9,RELA,STAT3	173 (7)
ganetespib		chemical drug			0.00744	AR,HLA-A,MYC	421 (23)
CARTPT		other			0.00744	CRH,FOS,GAP43	412 (24)
DAB2IP		other			0.00744	CDKN1A,EGR1,MYC	422 (21)
RUVBL2		transcription regulator			0.00744	CCND1,CCND2,PGR
KLF7		transcription regulator			0.00744	CDKN1A,IFIT3,IL1RN
DDB1		other			0.00744	BBC3,CDKN1A,FMOD	284 (10)
CNB-001		chemical reagent			0.00744	ATF3,DDIT3,SLC7A11
MYZAP		other			0.00744	DSP,FOS,GJA1	161 (7)
PPBP		cytokine			0.00744	COL18A1,COL6A3,SERPINE1
TAS1R3		G-protein coupled receptor			0.00744	SLC3A2,SLC7A11,SLC7A3
CYBA		enzyme			0.00744	CDKN1A,PIM1,SERPINE1	343 (22)
acriflavine		chemical toxicant			0.00744	CD274,MYC,SOCS3	223 (10)
sesame oil		chemical reagent			0.00744	EGR1,GJA1,MMP9	273 (12)
pargyline		chemical drug			0.00744	AR,CDKN1A,PVALB
allyl isothiocyanate		chemical toxicant			0.00744	FOS,HMOX1,MMP9	352 (19)
clonidine		chemical drug			0.00744	EGR1,FOS,MYC	310 (16)
zVAD		chemical - protease inhibitor			0.00744	CCL4,RELA,SPHK1	352 (19)
triptorelin		biologic drug			0.00744	FOS,JUN,PGR	378 (23)
MI-503		chemical reagent			0.00744	CCND2,COCH,SPP1
CRH	2.176	cytokine		1.094	0.00748	AR,CRH,CYP11A1,FOS,IL1RN,JUNB,SOCS3,UCN	348 (23)
DKK1		growth factor		-1.178	0.00748	BMP4,CCND1,CDKN1A,MMP9,MYC,PRLR,SLC7A11,TNNT2	387 (24)
IRF4		transcription regulator		-0.626	0.00756	BCL6,CD68,CDK2,Chil3/Chil4,DDIT3,EOMES,EZR,GPRIN3,IL1RN,MYC,PLAUR,PRKCQ,SCN2A,SPP1,ZFP36L1	303 (18)
[truncated: 1,585 more rows]
